# Supplementary material
Source: PubMed Central journal article supplement (PMC3931331)
Supplement: ol401039h_si_001.pdf [file ol401039h_si_001.pdf]

Supporting Information

**Enantioselective Michael Addition/Iminium Ion Cyclization  
Cascades of Tryptamine-Derived Ureas**

Isabelle Aillaud, David M. Barber, Amber L. Thompson and Darren J. Dixon

*Department of Chemistry, Chemistry Research Laboratory, University of Oxford,*

*Mansfield Road, Oxford, OX1 3TA, UK*

*darren.dixon@chem.ox.ac.uk*

## Contents

|                                                                                                          |            |
|----------------------------------------------------------------------------------------------------------|------------|
| <b>1. General experimental</b>                                                                           | <b>3</b>   |
| <b>2. Practical experimental</b>                                                                         | <b>5</b>   |
| <b>2.1 Synthesis and characterisation of tryptamine derived ureas</b>                                    | <b>5</b>   |
| <b>2.2 Synthesis and characterisation of cyclised products</b>                                           | <b>15</b>  |
| <b>3. <math>^1\text{H}</math> and <math>^{13}\text{C}</math> NMR spectra of tryptamine derived ureas</b> | <b>33</b>  |
| <b>4. <math>^1\text{H}</math> and <math>^{13}\text{C}</math> NMR spectra of cyclised products</b>        | <b>61</b>  |
| <b>5. HPLC traces of cyclised products</b>                                                               | <b>107</b> |
| <b>6. Single crystal X-ray diffraction data of 9r</b>                                                    | <b>130</b> |

## 1. General experimental

All non-aqueous reactions were conducted using oven-dried glassware and were magnetically stirred unless otherwise stated. Yields refer to chromatographically purified and spectroscopically pure compounds, unless otherwise stated.

### 1.1 Solvents and reagents

Concentration under reduced pressure was performed by rotary evaporation at 40 °C at the appropriate pressure. Reagents used were obtained from commercial suppliers or purified according to standard procedures. Triethylamine was distilled from calcium hydride under a positive pressure of dry nitrogen and stored over potassium hydroxide. Tryptamines,<sup>1</sup> tryptamine-derived thiourea **5h**,<sup>2</sup> tryptamine-derived urea **5i**,<sup>3</sup> unsaturated ketones **6c-d**<sup>4</sup> and catalysts **10**<sup>5</sup> were prepared according to reported procedures. Petroleum ether (PE) refers to distilled light petroleum of fraction 30 - 40 °C. Anhydrous dichloromethane and toluene were dried by filtration through activated alumina (powder ~150 mesh; pore size 58Å, basic) columns. Deuterated solvents were used as supplied.

### 1.2 Chromatography

Reactions were monitored by thin layer chromatography (TLC) using Merck silica gel 60 F254 plates and visualised by fluorescence quenching under UV light. In addition, TLC plates were stained with *p*-anisaldehyde. Chromatographic purification was performed on VWR 60 silica gel 40-63 µm using technical grade solvents that were used as supplied.

### 1.3 Melting points

Melting points were obtained on a Leica Galen III Hot-stage melting point apparatus and microscope and are uncorrected.

### 1.4 NMR spectra

NMR spectra were recorded on a Bruker Spectrospin spectrometer operating at 400 MHz or 500 MHz (<sup>1</sup>H acquisitions) and 100 MHz or 125 MHz (<sup>13</sup>C acquisitions). Chemical shifts (δ) are reported in ppm with the solvent resonance as the internal standard (e.g. DMSO δ 2.50 ppm for <sup>1</sup>H and 39.52 ppm for <sup>13</sup>C). Coupling constants (*J*) are reported in hertz (Hz). Data are reported as follows: s = singlet, d = doublet, t = triplet, q = quartet, dd = doublet of doublets, ddd = doublet of doublets of doublets, dt = doublet of triplets, td = triplet of doublets, m = multiplet, br. s. = broad signal, coupling constants in Hz, integration, assignment. Two-dimensional

---

<sup>1</sup> M. E. Muratore, C. A. Holloway, A. W. Pilling, R. I. Storer, G. Trevitt, D. J. Dixon, *J. Am. Chem. Soc.* **2009**, *131*, 10796–10797.

<sup>2</sup> R. J. Herr, J. L. Kuhler, H. Meckler, C. J. Opalka, *Synthesis* **2000**, *11*, 1569-1574.

<sup>3</sup> S. A. Rogers, D. C. Whitehead, T. Mullikin, C. Melander, *Org. Biomol. Chem.* **2010**, *8*, 3857–3859.

<sup>4</sup> L. A. Batory, C. E. McInnis, J. T. Njardarson, *J. Am. Chem. Soc.* **2006**, *128*, 16054–16055.

<sup>5</sup> R. I. Storer, D. E. Carrera, Y. Ni, D. W. C. MacMillan, *J. Am. Chem. Soc.* **2006**, *128*, 84–86.

spectroscopy (COSY, HSQC and HMBC) was used to assist in the assignment. The data are not reported.

### **1.5 Mass spectra**

Low-resolution mass spectra (ESI) were recorded on a Waters LCT Premier XE Micromass mass spectrometer. High-resolution mass spectra (ESI) were recorded on Bruker Daltonics MicroTOF mass spectrometer. High-resolution mass spectra (EI) were recorded on a Bruker FT-ICR Apex III mass spectrometer.

### **1.6 Infrared spectra**

Infrared spectra were recorded on a Bruker Tensor 27 FT-IR spectrometer as a thin film on a sodium chloride plate. Only selected maximum absorbances are reported.

### **1.7 Determination of enantiomeric excesses**

Enantiomeric excesses were determined using high performance liquid chromatography (HPLC) performed on Agilent Technologies 1200 Series or 1260 Infinity Series systems (column and solvent conditions are given for each compound).

### **1.8 Optical rotations**

Optical rotations were recorded using a Perkin-Elmer 241 polarimeter; specific rotation (SR) ( $[\alpha]_D^{23}$ ) are reported in  $10^{-1} \text{ deg cm}^2 \text{ g}^{-1}$ ; concentrations ( $c$ ) are quoted in g/100 mL; D refers to the D-line of sodium (589 nm), temperatures ( $T$ ) are given in degrees Celsius ( $^{\circ}\text{C}$ ).

All atom numbering used in this section is arbitrary and does not follow any particular convention.

## 2. Practical experimental

### 2.1 Synthesis of starting materials

#### 2.1.1 General procedure I for the preparation of tryptamine-derived ureas 5a-g

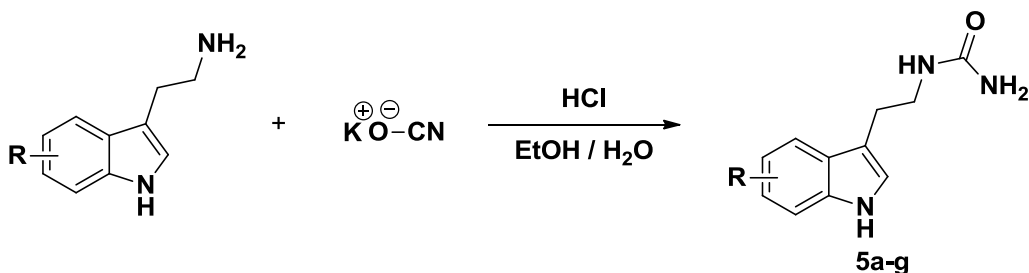

Concentrated HCl (37% in water, 1.2 eq.) was added to tryptamine (1.0 eq.) at 0 °C and the mixture was dissolved in refluxing ethanol (1.05 mL/mmol). The solution was cooled to room temperature and added to a solution of KOCN (1.2 eq.) dissolved in distilled water (1.05 mL/mmol). The resulting mixture was stirred at room temperature for the indicated time. The reaction mixture was then concentrated *in vacuo* and the residue was purified by flash column chromatography on silica gel to afford the desired ureas **5a-g**.

##### 2.1.1.1 Synthesis and characterisation of 1-[2-(1*H*-indol-3-yl)ethyl]urea **5a**

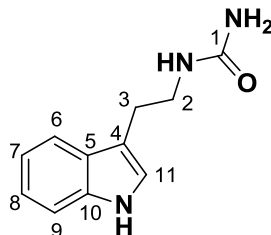

The title compound was synthesised according to general procedure **I**. Tryptamine (10.0 g, 62.4 mmol) was reacted with KOCN (6.08 g, 74.9 mmol) in ethanol (65 mL) and water (65 mL) for 15 hours. The residue was purified by flash column chromatography on silica gel (solvent: CH<sub>2</sub>Cl<sub>2</sub>/MeOH 95/5) to afford product **5a** in 55% yield (7.03 g) as a white powder.

**m.p.** 140-142 °C; **IR** (neat)  $\nu$ =3413, 3376, 3344, 3146, 1637, 1552, 1455, 1348, 1088, 747, 737; **<sup>1</sup>H NMR** (500 MHz, [D<sub>6</sub>]DMSO, 25 °C)  $\delta$ =10.83 (br. s., 1H; NH indole), 7.55 (d,  $J$ =7.5 Hz, 1H; H<sub>6</sub>), 7.36 (d,  $J$ =7.5 Hz, 1H; H<sub>9</sub>), 7.15 (d,  $J$ =2.5 Hz, 1H; H<sub>11</sub>), 7.08 (td,  $J$ =7.5, 1.0 Hz, 1H; H<sub>8</sub>), 6.99 (td,  $J$ =7.5, 1.0 Hz, 1H; H<sub>7</sub>), 6.01-5.98 (m, 1H; NH urea), 5.49 (br. s., 2H; NH<sub>2</sub> urea), 3.30 (q,  $J$ =7.5 Hz, 2H; H<sub>2</sub>), 2.81 (t,  $J$ =7.5 Hz, 2H; H<sub>3</sub>); **<sup>13</sup>C NMR** (125 MHz, [D<sub>6</sub>]DMSO, 25 °C)  $\delta$ =158.8 (C<sub>1</sub>), 136.3 (C<sub>10</sub>), 127.3 (C<sub>5</sub>), 122.6 (C<sub>11</sub>), 120.9 (C<sub>8</sub>), 118.4 (C<sub>7</sub>), 118.2 (C<sub>6</sub>), 112.0 (C<sub>4</sub>), 111.4 (C<sub>9</sub>), 39.6 (C<sub>2</sub>), 26.1 (C<sub>3</sub>); **MS**  $m/z$  (ES<sup>+</sup>) 226 ([M+Na]<sup>+</sup>, 100%); **HRMS** (ES<sup>+</sup>) exact mass calculated for [M+Na]<sup>+</sup> (C<sub>11</sub>H<sub>13</sub>N<sub>3</sub>NaO<sup>+</sup>) requires  $m/z$  226.0951, found  $m/z$  226.0956.

### 2.1.1.2 Synthesis and characterisation of 1-[2-(5-methoxy-1*H*-indol-3-yl)ethyl]urea **5b**

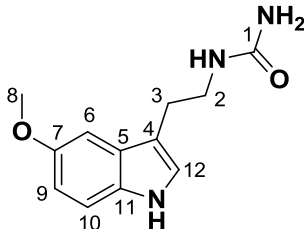

The title compound was synthesised according to general procedure **I**. 5-Methoxytryptamine (500 mg, 2.63 mmol) was reacted with KOCN (256 mg, 3.16 mmol) in ethanol (2.8 mL) and water (2.8 mL) for 15 hours. The residue was purified by flash column chromatography on silica gel (solvent: CH<sub>2</sub>Cl<sub>2</sub>/MeOH 95/5) to afford product **5b** in 52% yield (307 mg) as a brown powder.

**m.p.** 141-143 °C; **IR** (neat)  $\nu$ =3489, 3385, 3184, 1655, 1608, 1491, 1455, 1215, 800, 702; **<sup>1</sup>H NMR** (500 MHz, [D<sub>6</sub>]DMSO, 25 °C)  $\delta$ =10.65 (br. s., 1H; NH indole); 7.23 (d,  $J$ =8.5 Hz, 1H; H10), 7.10 (d,  $J$ =1.5 Hz, 1H; H12), 7.04 (d,  $J$ =2.0 Hz, 1H; H6), 6.72 (dd,  $J$ =8.5, 2.0, Hz, 1H; H9), 5.96 (br. s., 1H; NH urea), 5.45 (br. s., 2H; NH<sub>2</sub> urea), 3.76 (s, 3H; H8), 3.28-3.25 (m, 2H; H2), 2.76 (t,  $J$ =7.0 Hz, 2H; H3); **<sup>13</sup>C NMR** (125 MHz, [D<sub>6</sub>]DMSO, 25 °C)  $\delta$ =158.7 (C1), 152.9 (C7), 131.4 (C11), 127.6 (C5), 123.3 (C12), 111.9 (C10), 111.8 (C4), 111.0 (C9), 100.2 (C6), 55.3 (C8), 39.5 (C2), 26.1 (C3); **MS**  $m/z$  (ES<sup>+</sup>) 489 ([2M+Na]<sup>+</sup>, 100%); **HRMS** (ES<sup>+</sup>) exact mass calculated for [M+Na]<sup>+</sup> (C<sub>12</sub>H<sub>15</sub>N<sub>3</sub>NaO<sub>2</sub><sup>+</sup>) requires  $m/z$  256.1056, found  $m/z$  256.1058.

### 2.1.1.3 Synthesis and characterisation of 1-[2-(5-fluoro-1*H*-indol-3-yl)ethyl]urea **5c**

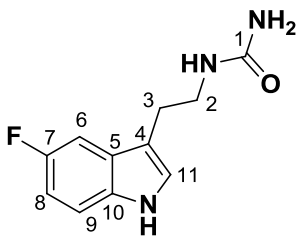

The title compound was synthesised according to general procedure **I**. 5-Fluorotryptamine (500 mg, 2.81 mmol) was reacted with KOCN (274 mg, 3.37 mmol) in ethanol (3.0 mL) and water (3.0 mL) for 15 hours. The residue was purified by flash column chromatography on silica gel (solvent: CH<sub>2</sub>Cl<sub>2</sub>/MeOH 95/5) to afford product **5c** in 53% yield (330 mg) as a brown powder.

**m.p.** 159-161 °C; **IR** (neat)  $\nu$ =3501, 3343, 3305, 1694, 1634, 1580, 1118, 935, 774; **<sup>1</sup>H NMR** (500 MHz, [D<sub>6</sub>]DMSO, 25 °C)  $\delta$ =10.92 (br. s., 1H; NH indole); 7.33 (dd,  $J$ =9.0, 4.5 Hz, 1H; H8), 7.30 (dd,  $J$ =10.0, 2.5 Hz, 1H; H6), 7.22 (d,  $J$ =2.0 Hz, 1H; H11), 6.91 (td,  $J$ =9.0, 2.5 Hz, 1H; H9), 5.96 (br. s., 1H; NH urea), 5.44 (br. s., 2H; NH<sub>2</sub> urea), 3.23-3.19 (m, 2H; H2), 2.75 (t,  $J$ =7.0 Hz, 2H; H3); **<sup>13</sup>C NMR** (125 MHz, [D<sub>6</sub>]DMSO, 25 °C)  $\delta$ =158.7 (C1), 156.1 (d,  $J$ =229 Hz, C7),

132.9 (C5), 127.5 (d,  $J=10$  Hz, C10), 124.8 (C11), 112.4 (d,  $J=5$  Hz, C4), 112.2 (d,  $J=10$  Hz, C8), 108.9 (d,  $J=25$  Hz, C9), 103.0 (d,  $J=25$  Hz, C6), 48.6 (C2), 26.0 (C3); **MS**  $m/z$  (ES+) 465 ( $[2M+Na]^+$ , 100%); **HRMS** (ES+) exact mass calculated for  $[M+Na]^+$  ( $C_{11}H_{12}FN_3NaO^+$ ) requires  $m/z$  244.0857, found  $m/z$  244.0862.

#### 2.1.1.4 Synthesis and characterisation of 1-[2-(5-chloro-1H-indol-3-yl)ethyl]urea 5d

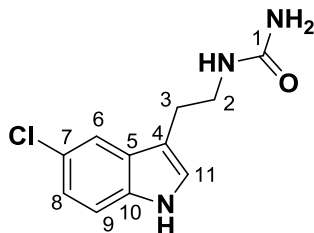

The title compound was synthesised according to general procedure **I**. 5-Chlorotryptamine (500 mg, 2.16 mmol) was reacted with KOCN (211 mg, 2.59 mmol) in ethanol (2.3 mL) and water (2.3 mL) for 15 hours. The residue was purified by flash column chromatography on silica gel (solvent:  $CH_2Cl_2/MeOH$  95/5) to afford product **5d** in 49% yield (252 mg) as a pale yellow powder.

**m.p.** 169-171 °C; **IR** (neat)  $\nu=3481, 3440, 3345, 1646, 1553, 1333, 1100, 796, 662$ ;  **$^1H$  NMR** (500 MHz,  $[D_6]DMSO, 25$  °C)  $\delta=11.06$  (br. s., 1H; NH indole), 7.59 (d,  $J=2.0$  Hz, 1H; H6), 7.36 (d,  $J=8.5$  Hz, 1H; H9), 7.23 (s, 1H; H11), 7.06 (dd,  $J=8.5, 2.0$  Hz, 1H; H8), 5.97 (br. s., 1H; NH urea), 5.49 (br. s., 2H;  $NH_2$  urea), 3.26-3.22 (m, 2H; H2), 2.76 (t,  $J=7.5$  Hz, 2H; H3);  **$^{13}C$  NMR** (125 MHz,  $[D_6]DMSO, 25$  °C)  $\delta=158.7$  (C1), 134.6 (C10), 128.4 (C5), 124.6 (C11), 122.9 (C7), 120.8 (C8), 117.7 (C6), 112.8 (C9), 112.1 (C4), 39.5 (C2), 25.9 (C3); **MS**  $m/z$  (ES+) 497 ( $[2M+Na]^+$ , 100%); **HRMS** (ES+) exact mass calculated for  $[M+Na]^+$  ( $C_{11}H_{12}ClN_3NaO^+$ ) requires  $m/z$  260.0561, found  $m/z$  260.0559.

#### 2.1.1.5 Synthesis and characterisation of 1-[2-(6-fluoro-1H-indol-3-yl)ethyl]urea 5e

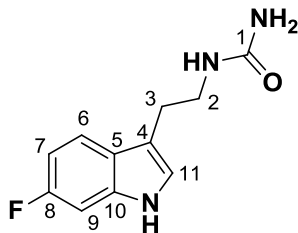

The title compound was synthesised according to general procedure **I**. 6-Fluorotryptamine (400 mg, 2.25 mmol) was reacted with KOCN (218 mg, 2.69 mmol) in ethanol (2.4 mL) and water (2.4 mL) for 15 hours. The residue was purified by flash column chromatography on silica gel (solvent:  $CH_2Cl_2/MeOH$  95/5) to afford product **5e** in 52% yield (260 mg) as a brown powder.

**m.p.** 161-163 °C; **IR** (neat)  $\nu$ =3500, 3359, 3334, 1638, 1577, 1566, 1134, 1097, 800; **<sup>1</sup>H NMR** (500 MHz, [D<sub>6</sub>]DMSO, 25 °C)  $\delta$ =10.89 (br. s., 1H; NH indole), 7.53 (dd,  $J$ =8.5, 5.5 Hz, 1H; H6), 7.14 (d,  $J$ =2.5 Hz, 1H; H11), 7.10 (dd,  $J$ =10.0, 2.0 Hz, 1H; H9), 6.83 (td,  $J$ =8.5, 2.5 Hz, 1H; H7), 5.93 (br. s., 1H; NH urea), 5.42 (br. s., 2H; NH<sub>2</sub> urea), 3.28-3.21 (m, 2H; H2), 2.75 (t,  $J$ =7.0 Hz, 2H; H3); **<sup>13</sup>C NMR** (125 MHz, [D<sub>6</sub>]DMSO, 25 °C)  $\delta$ =158.79 (d,  $J$ =231 Hz, C8), 158.7 (C1), 136.0 (d,  $J$ =10 Hz, C4), 124.1 (C5), 123.2 (C11), 119.3 (d,  $J$ =10 Hz, C6), 112.3 (C10), 106.6 (d,  $J$ =25 Hz, C7), 97.2 (d,  $J$ =25 Hz, C9), 39.5 (C2), 26.0 (C3); **MS**  $m/z$  (ES+) 465 ([2M+Na]<sup>+</sup>, 100%); **HRMS** (ES+) exact mass calculated for [M+Na]<sup>+</sup> (C<sub>11</sub>H<sub>12</sub>FN<sub>3</sub>NaO<sup>+</sup>) requires  $m/z$  244.0857, found  $m/z$  244.0859.

### 2.1.1.6 Synthesis and characterisation of 1-[2-(7-methyl-1H-indol-3-yl)ethyl]urea 5f

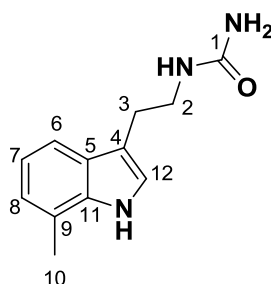

The title compound was synthesised according to general procedure I. 7-Methyltryptamine (1.00 g, 5.74 mmol) was reacted with KOCN (561 mg, 6.91 mmol) in ethanol (6.0 mL) and water (6.0 mL) for 60 hours. The residue was purified by flash column chromatography on silica gel (solvent: CH<sub>2</sub>Cl<sub>2</sub>/MeOH 95/5) to afford product **5f** in 55% yield (0.690 g) as a white powder.

**m.p.** 144-146 °C; **IR** (neat)  $\nu$ =3402, 3392, 3322, 3201, 1643, 1607, 1516, 777, 743; **<sup>1</sup>H NMR** (500 MHz, [D<sub>6</sub>]DMSO, 25 °C)  $\delta$ =10.78 (br. s., 1H; NH indole), 7.38 (d,  $J$ =7.5 Hz, 1H; H6), 7.14 (d,  $J$ =2.5 Hz, 1H; H12), 6.92-6.87 (m, 2H; H7 and H8), 5.96 (t,  $J$ =5.5 Hz, 1H; NH urea), 5.46 (br. s., 2H; NH<sub>2</sub> urea), 3.31-3.27 (m, 2H; H2), 2.79 (t,  $J$ =7.0 Hz, 2H; H3), 2.45 (s, 3H; H10); **<sup>13</sup>C NMR** (125 MHz, [D<sub>6</sub>]DMSO, 25 °C)  $\delta$ =158.8 (C1), 135.8 (C11), 126.9 (C5), 122.3 (C12), 121.4 (C8), 120.4 (C9), 118.4 (C7), 116.0 (C6), 112.4 (C4), 39.6 (C2), 26.2 (C3), 16.8 (C10); **MS**  $m/z$  (ES+) 457 ([2M+Na]<sup>+</sup>, 100%); **HRMS** (ES+) exact mass calculated for [M+Na]<sup>+</sup> (C<sub>12</sub>H<sub>15</sub>N<sub>3</sub>NaO<sup>+</sup>) requires  $m/z$  240.1107, found  $m/z$  240.1110.



### 2.1.1.7 Synthesis and characterisation of 1-[2-(7-ethyl-1*H*-indol-3-yl)ethyl]urea **5g**

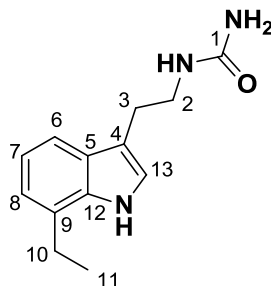

The title compound was synthesised according to general procedure I. 7-Ethyltryptamine (1.00 g, 5.31 mmol) was reacted with KOCN (517 mg, 6.37 mmol) in ethanol (5.6 mL) and water (5.6 mL) for 15 hours. The residue was purified by flash column chromatography on silica gel (solvent: CH<sub>2</sub>Cl<sub>2</sub>/MeOH 95/5) to afford product **5g** in 59% yield (0.730 g) as a brown powder.

**m.p.** 164-166 °C; **IR** (neat)  $\nu$ =3390, 3322, 3206, 2964, 1643, 1607, 1097, 1081, 799, 742; **<sup>1</sup>H NMR** (400 MHz, [D<sub>6</sub>]DMSO, 25 °C)  $\delta$ =10.77 (br. s., 1H; NH indole), 7.36 (d,  $J$ =7.0 Hz, 1H; H6), 7.11 (d,  $J$ =2.0 Hz, 1H; H13), 6.93-6.85 (m, 2H; H7 and H8), 5.93 (br. s., 1H; NH urea), 5.42 (br. s., 2H; NH<sub>2</sub> urea), 3.30-3.24 (m, 2H; H2), 2.86-2.81 (m, 2H; H10), 2.89-2.75 (m, 2H; H3), 1.25 (t,  $J$ =7.5 Hz, 3H; H11); **<sup>13</sup>C NMR** (100 MHz, [D<sub>6</sub>]DMSO, 25 °C)  $\delta$ =159.6 (C1), 135.8 (C12), 128.0 (C9), 127.6 (C5), 123.1 (C13), 120.5 (C8), 119.4 (C7), 116.9 (C6), 113.3 (C4), 39.5 (C2), 27.1 (C3), 24.6 (C10), 15.3 (C11); **MS**  $m/z$  (ES<sup>+</sup>) 485 ([2M+Na]<sup>+</sup>, 100%); **HRMS** (ES<sup>+</sup>) exact mass calculated for [M+Na]<sup>+</sup> (C<sub>13</sub>H<sub>17</sub>N<sub>3</sub>NaO<sup>+</sup>) requires  $m/z$  254.1264, found  $m/z$  254.1265.

### 2.1.2 General procedure II for the preparation of tryptamine-derived ureas **5j-p**

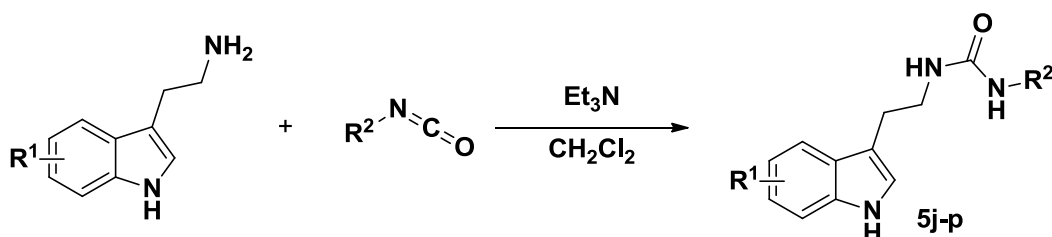

Tryptamine (1.0 eq.) was dissolved in CH<sub>2</sub>Cl<sub>2</sub> at room temperature. Triethylamine (2.0 eq.) was added and the reaction mixture was cooled to 0 °C. Isocyanate (0.90 eq.) was then added dropwise and the reaction mixture was allowed to slowly warm to room temperature over the indicated time. The resulting precipitate was filtered off washing with CH<sub>2</sub>Cl<sub>2</sub> and dried under vacuum to afford the desired ureas **5j-p**. The ureas were used in the next step without further purification.

### 2.1.2.1 Synthesis and characterisation of 1-[2-(7-ethyl-1*H*-indol-3-yl)ethyl]-3-(ethyl)urea **5j**

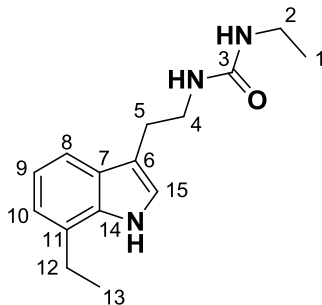

The title compound was synthesised according to general procedure **II**. 7-Ethyltryptamine (500 mg, 2.66 mmol) was reacted with ethylisocyanate (0.190 mL, 2.39 mmol) in CH<sub>2</sub>Cl<sub>2</sub> (50 mL) for 14 hours. Product **5j** was isolated in 99% yield (623 mg) as a brown powder.

**m.p.** 142-144 °C; **IR** (neat)  $\nu$ =3317, 3063, 2971, 2874, 1571, 1450, 1256, 738, 657; **<sup>1</sup>H NMR** (500 MHz, [D<sub>6</sub>]DMSO, 25 °C)  $\delta$ =10.76 (br. s., 1H; NH indole), 7.36 (d,  $J$ =7.5 Hz, 1H; H8), 7.10 (d,  $J$ =2.0 Hz, 1H; H15), 6.93-6.88 (m, 2H; H9 and H10), 5.83-5.78 (m, 1H; NH urea), 5.75-5.71 (m, 1H; NH urea), 3.31-3.23 (m, 2H; H4), 3.04-2.99 (m, 2H; H2), 2.83 (q,  $J$ =7.5 Hz, 2H; H12), 2.77 (t,  $J$ =7.5 Hz, 2H; H5), 1.25 (t,  $J$ =7.5 Hz, 3H; H13), 0.98 (t,  $J$ =7.0 Hz, 3H; H1); **<sup>13</sup>C NMR** (125 MHz, [D<sub>6</sub>]DMSO, 25 °C)  $\delta$ =158.0 (C3), 134.9 (C14), 127.1 (C11), 126.7 (C7), 122.2 (C15), 119.6 (C10), 118.5 (C9), 116.0 (C8), 112.4 (C6), 39.5 (C4), 34.0 (C2), 26.2 (C5), 23.7 (C12), 15.7 (C1), 14.4 (C13); **MS**  $m/z$  (ES<sup>+</sup>) 541 ([2M+Na]<sup>+</sup>, 100%); **HRMS** (ES<sup>+</sup>) exact mass calculated for [M+Na]<sup>+</sup> (C<sub>15</sub>H<sub>21</sub>N<sub>3</sub>NaO<sup>+</sup>) requires  $m/z$  282.1577, found  $m/z$  282.1585.

### 2.1.2.2 Synthesis and characterisation of 1-[2-(1*H*-indol-3-yl)ethyl]-3-(dodecyl)urea **5k**

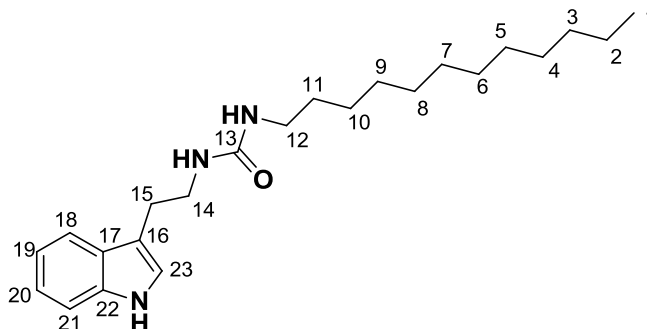

The title compound was synthesised according to general procedure **II**. Tryptamine (1.00 g, 6.24 mmol) was reacted with dodecylisocyanate (1.35 mL, 5.62 mmol) in CH<sub>2</sub>Cl<sub>2</sub> (100 mL) for 14 hours. Product **5k** was isolated in 70% yield (1.62 g) as a white powder.

**m.p.** 110-112 °C; **IR** (neat)  $\nu$ =3431, 3353, 3322, 2920, 2848, 1618, 1583, 735; **<sup>1</sup>H NMR** (500 MHz, [D<sub>6</sub>]DMSO, 25 °C)  $\delta$ =10.74 (br. s., 1H; NH indole), 7.52 (d,  $J$ =7.5 Hz, 1H; H18), 7.33 (d,  $J$ =7.5 Hz, 1H; H21), 7.10 (d,  $J$ =2.0 Hz, 1H; H23), 7.06 (td,  $J$ =7.5, 1.0 Hz, 1H; H20), 6.96 (td,

$J=7.5$ , 1.0 Hz, 1H; H19), 5.87 (t,  $J=5.5$  Hz, 1H; NH urea), 5.82 (t,  $J=5.5$  Hz, 1H; NH urea), 3.28-3.24 (m, 2H; H14), 2.97-2.93 (m, 2 H; H12), 2.77 (t,  $J=7.0$  Hz, 2H; H15), 1.35-1.30 (m, 2H; H11), 1.28-1.14 (m, 18H; H2-H10), 0.83 (t,  $J=7.0$  Hz, 3H; H1);  $^{13}\text{C}$  NMR (125 MHz,  $[\text{D}_6]\text{DMSO}$ , 25 °C)  $\delta=158.4$  (C13), 136.2 (C22), 127.2 (C17), 122.6 (C23), 120.9 (C20), 118.3 (C19), 118.2 (C18), 112.0 (C16), 111.3 (C21), 40.2 (C14), 39.2 (C12), 31.2 (1C of C2-C10), 29.9 (C11), 29.0 (1C, C2-C10), 29.0 (1C of C2-C10), 28.9 (1C of C2-C10), 28.9 (1C of C2-C10), 28.7 (1C of C2-C10), 28.6 (1C of C2-10), 26.3 (1C of C2-C10), 26.0 (C15), 22.0 (1C of C2-C10), 13.9 (C1); **MS**  $m/z$  (ES+) 743 ( $[\text{2M}+\text{H}]^+$ , 100%); **HRMS** (ES+) exact mass calculated for  $[\text{M}+\text{Na}]^+$  ( $\text{C}_{23}\text{H}_{37}\text{N}_3\text{NaO}^+$ ) requires  $m/z$  394.2829, found  $m/z$  394.2832.

### 2.1.2.3 Synthesis and characterisation of 1-[2-(*1H*-indol-3-yl)ethyl]-3-(4-fluorophenyl)urea **51**

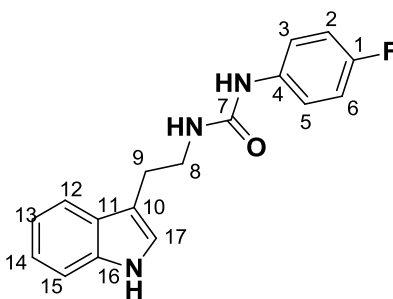

The title compound was synthesised according to general procedure **II**. Tryptamine (1.00 g, 6.24 mmol) was reacted with 4-fluorophenylisocyanate (0.640 mL, 5.62 mmol) in  $\text{CH}_2\text{Cl}_2$  (100 mL) for 14 hours. Product **51** was isolated in 99% yield (1.67 g) as a white powder.

**m.p.** 172-174 °C; **IR** (neat)  $\nu=3368$ , 3292, 2918, 2877, 1623, 1556, 1505, 1219, 838, 738;  $^1\text{H}$  NMR (500 MHz,  $[\text{D}_6]\text{DMSO}$ , 25 °C)  $\delta=10.84$  (br. s., 1H; NH indole), 8.52 (s, 1H; C4-NH urea), 7.58 (d,  $J=8.0$  Hz, 1H; H12), 7.41-7.38 (m, 2H; H3 and H5), 7.35 (d,  $J=8.0$  Hz, 1H; H15), 7.18 (d,  $J=2.0$  Hz, 1H; H17), 7.09-7.03 (m, 3H; H2, H6 and H14), 6.98 (td,  $J=8.0$ , 1.5 Hz, 1H; H13), 6.11 (t,  $J=5.5$  Hz, 1H; C8-NH urea), 3.42-3.36 (m, 2H; H8), 2.86 (t,  $J=7.5$  Hz, 2H; H9);  $^{13}\text{C}$  NMR (125 MHz,  $[\text{D}_6]\text{DMSO}$ , 25 °C)  $\delta=156.8$  (d,  $J=236$  Hz, C1), 155.3 (C7), 136.9 (C4), 136.3 (C16), 127.2 (C11), 122.7 (C17), 120.9 (C14), 119.2 (d,  $J=8$  Hz, C3 and C5), 118.3 (C13), 118.2 (C12), 115.1 (d,  $J=21$  Hz, C2 and C6), 111.7 (C10), 111.4 (C15), 39.5 (C8), 25.8 (C9); **MS**  $m/z$  (ES+) 617 ( $[\text{2M}+\text{Na}]^+$ , 100%); **HRMS** (ES+) exact mass calculated for  $[\text{M}+\text{Na}]^+$  ( $\text{C}_{17}\text{H}_{16}\text{FN}_3\text{NaO}^+$ ) requires  $m/z$  320.1170, found  $m/z$  320.1166.

#### 2.1.2.4 Synthesis and characterisation of 1-[2-(7-methyl-1*H*-indol-3-yl)ethyl]-3-(4-fluorophenyl)urea **5m**

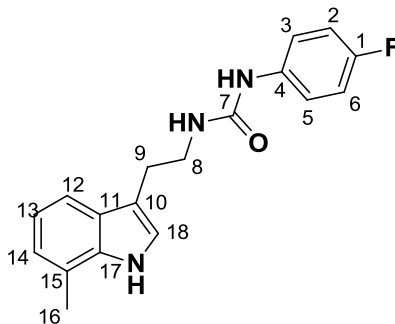

The title compound was synthesised according to general procedure **II**. 7-Methyltryptamine (500 mg, 2.87 mmol) was reacted with 4-fluorophenylisocyanate (0.290 mL, 2.58 mmol) in CH<sub>2</sub>Cl<sub>2</sub> (50 mL) for 14 hours. Product **5m** was isolated in 53% yield (476 mg) as a white powder.

**m.p.** 164-166 °C; **IR** (neat)  $\nu$ =3414, 3322, 1630, 1570, 1506, 1215, 832, 748; **<sup>1</sup>H NMR** (500 MHz, [D<sub>6</sub>]DMSO, 25 °C)  $\delta$ =10.81 (br. s., 1H; NH indole), 8.52 (s, 1H; C4-NH urea), 7.42-7.38 (m, 3H; H3, H5 and H12), 7.17 (d,  $J$ =2.0 Hz, 1H; H18), 7.07-7.04 (m, 2H; H2 and H6), 6.87-6.92 (m, 2H; H13 and H14), 6.10 (t,  $J$ =5.5 Hz, 1H; C8-NH urea), 3.46-3.39 (m, 2H; H8), 2.86 (t,  $J$ =7.0 Hz, 2H; H9), 2.45 (s, 3H; H16); **<sup>13</sup>C NMR** (125 MHz, [D<sub>6</sub>]DMSO, 25 °C)  $\delta$ =156.8 (d,  $J$ =240 Hz, C1), 155.2 (C7), 137.0 (C4), 135.8 (C17), 126.9 (C11), 122.5 (C18), 121.4 (C14), 120.4 (C15), 119.1 (d,  $J$ =8 Hz, C3 and C5), 118.5 (C13), 116.0 (C12), 115.1 (d,  $J$ =21 Hz, C2 and C6), 112.2 (C10), 39.5 (C8), 26.0 (C9), 16.8 (C16); **MS**  $m/z$  (ES+) 645 ([2M+Na]<sup>+</sup>, 100%); **HRMS** (ES+) exact mass calculated for [M+Na]<sup>+</sup> (C<sub>18</sub>H<sub>18</sub>FN<sub>3</sub>NaO<sup>+</sup>) requires  $m/z$  334.1326, found  $m/z$  334.1326.

#### 2.1.2.5 Synthesis and characterisation of 1-[2-(1*H*-indol-3-yl)ethyl]-3-(4-methoxyphenyl)urea **5n**

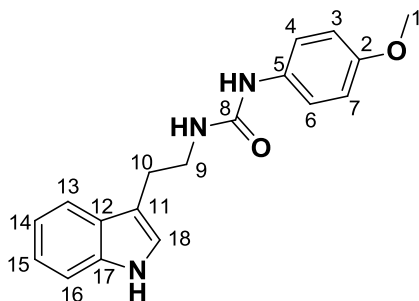

The title compound was synthesised according to general procedure **II**. Tryptamine (1.00 g, 6.24 mmol) was reacted with 4-methoxyphenylisocyanate (0.730 mL, 5.62 mmol) in CH<sub>2</sub>Cl<sub>2</sub> (100 mL) for 14 hours. Product **5n** was isolated in 99% yield (1.88 g) as a white powder.

**m.p.** 165-167 °C; **IR** (neat)  $\nu$ =3370, 3288, 1624, 1556, 1506, 1244, 834, 745; **<sup>1</sup>H NMR** (500 MHz, [D<sub>6</sub>]DMSO, 25 °C)  $\delta$ =10.84 (br. s., 1H; NH indole), 8.28 (s, 1H; C5-NH urea), 7.58 (d,  $J$ =7.5 Hz, 1H; H13), 7.36 (d,  $J$ =8.0 Hz, 1H; H16), 7.29 (dd,  $J$ =8.0, 1.5 Hz, 2H; H4 and H6), 7.18 (d,  $J$ =2.0 Hz, 1H; H18), 7.08 (td,  $J$ =7.5, 1.5 Hz, 1H; H15), 6.99 (td,  $J$ =8.0, 1.5 Hz, 1H; H14), 6.82 (dd,  $J$ =8.0, 1.5 Hz, 2H; H3 and H7), 6.03 (t,  $J$ =5.5 Hz, 1H; C9-NH urea), 3.71 (s, 3H; H1), 3.40-3.38 (m, 2H; H9), 2.86 (t,  $J$ =7.5 Hz, 2H; H10); **<sup>13</sup>C NMR** (125 MHz, [D<sub>6</sub>]DMSO, 25 °C)  $\delta$ =155.5 (C8), 153.9 (C2), 136.3 (C17), 133.7 (C5), 127.2 (C12), 122.7 (C18), 120.9 (C15), 119.4 (C4 and C6), 118.2 (C14), 118.2 (C13), 113.9 (C3 and C7), 111.8 (C11), 111.4 (C16), 55.1 (C1), 39.5 (C9), 25.9 (C10); **MS**  $m/z$  (ES+) 310 ([M+H]<sup>+</sup>, 100%); **HRMS** (ES+) exact mass calculated for [M+Na]<sup>+</sup> (C<sub>18</sub>H<sub>19</sub>N<sub>3</sub>NaO<sub>2</sub><sup>+</sup>) requires  $m/z$  332.1369, found  $m/z$  332.1369.

### 2.1.2.6 Synthesis and characterisation of 1-[2-(5-fluoro-1H-indol-3-yl)ethyl]-3-(4-methoxyphenyl)urea **5o**

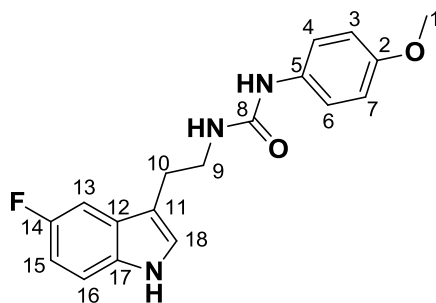

The title compound was synthesised according to general procedure **II**. 5-Fluorotryptamine (747 mg, 4.19 mmol) was reacted with 4-methoxyphenylisocyanate (0.490 mL, 3.77 mmol) in CH<sub>2</sub>Cl<sub>2</sub> (75 mL) for 14 hours. Product **5o** was isolated in 44% yield (605 mg) as a brown powder.

**m.p.** 179-181 °C; **IR** (neat)  $\nu$ =3369, 3278, 2917, 1622, 1553, 1505, 1200, 1108, 834, 803; **<sup>1</sup>H NMR** (500 MHz, [D<sub>6</sub>]DMSO, 25 °C)  $\delta$ =10.95 (br. s., 1H; NH indole), 8.28 (s, 1H; C5-NH urea), 7.37-7.31 (m, 2H; H13 and H15), 7.29-7.26 (m, 3H; H4, H6 and H18), 6.92 (td,  $J$ =9.0, 2.5 Hz, 1H; H16), 6.81 (d,  $J$ =9.0 Hz, 2H; H3 and H7), 6.02 (t,  $J$ =5.5 Hz, 1H; C9-NH urea), 3.70 (s, 3H; H1), 3.40-3.36 (m, 2H; H9), 2.82 (t,  $J$ =7.0 Hz, 2H; H10); **<sup>13</sup>C NMR** (125 MHz, [D<sub>6</sub>]DMSO, 25 °C)  $\delta$ =156.6 (d,  $J$ =231 Hz, C14), 155.4 (C8), 153.9 (C2), 133.7 (C5), 132.9 (C17), 127.5 (d,  $J$ =10 Hz, C12), 124.9 (C18), 119.4 (C4 and C6), 113.9 (C3 and C7), 112.2 (d,  $J$ =25 Hz, C15), 112.2 (C11), 109.1 (d,  $J$ =25 Hz, C16), 103.1 (d,  $J$ =21 Hz, C13), 55.1 (C1), 39.5 (C9), 25.8 (C10); **MS**  $m/z$  (ES+) 655 ([2M+H]<sup>+</sup>, 100%); **HRMS** (ES+) exact mass calculated for [M+Na]<sup>+</sup> (C<sub>18</sub>H<sub>18</sub>FN<sub>3</sub>NaO<sub>2</sub><sup>+</sup>) requires  $m/z$  350.1275, found  $m/z$  350.1276.

### 2.1.2.7 Synthesis and characterisation of 1-[2-(7-ethyl-1*H*-indol-3-yl)ethyl]-3-(4-methoxyphenyl)urea **5p**

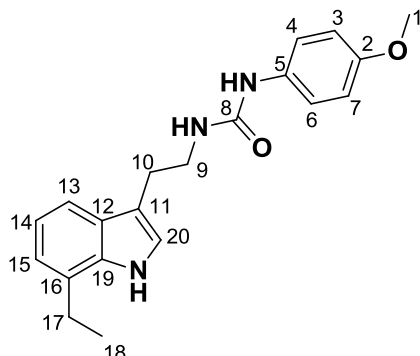

The title compound was synthesised according to general procedure **II**. 7-Ethyltryptamine (500 mg, 2.66 mmol) was reacted with 4-methoxyphenylisocyanate (0.310 mL, 2.39 mmol) in CH<sub>2</sub>Cl<sub>2</sub> (50 mL) for 14 hours. Product **5p** was isolated in 45% yield (405 mg) as a pale brown powder.

**m.p.** 160-162 °C; **IR** (neat)  $\nu$ =3454, 3426, 3391, 2966, 2934, 1630, 1575, 1245, 1030, 832, 738; **<sup>1</sup>H NMR** (500 MHz, [D<sub>6</sub>]DMSO, 25 °C)  $\delta$ =10.80 (br. s., 1H; NH indole), 8.27 (s, 1H; C5-NH urea), 7.40 (d,  $J$ =7.5 Hz, 1H; H13), 7.28 (d,  $J$ =9.0 Hz, 2H; H4 and H6), 7.15 (d,  $J$ =2.5 Hz, 1H; H20), 6.94-6.88 (m, 2H; H14 and H15), 6.81 (d,  $J$ =9.0 Hz, 2H; H3 and H7), 6.01 (t,  $J$ =5.5 Hz, 1H; C8-NH urea), 3.42-3.36 (m, 2H; H9), 3.69 (s, 3H; H1), 2.82-2.86 (m, 4H; H10 and H17), 1.26 (t,  $J$ =7.5 Hz, 3H; H18); **<sup>13</sup>C NMR** (125 MHz, [D<sub>6</sub>]DMSO, 25 °C)  $\delta$ =155.5 (C8), 153.9 (C2), 135.0 (C19), 133.7 (C5), 127.1 (C16), 126.8 (C12), 122.4 (C20), 119.6 (C15), 119.4 (C4 and C6), 118.6 (C14), 116.0 (C13), 113.9 (C3 and C7), 112.2 (C11), 55.1 (C1), 39.5 (C9), 26.0 (C10), 23.7 (C17), 14.4 (C18); **MS**  $m/z$  (ES+) 697 ([2M+Na]<sup>+</sup>, 100%); **HRMS** (ES+) exact mass calculated for [M+Na]<sup>+</sup> (C<sub>20</sub>H<sub>23</sub>N<sub>3</sub>NaO<sub>2</sub><sup>+</sup>) requires  $m/z$  360.1682, found  $m/z$  360.1681.

## 2.2 General procedure III for the enantioselective synthesis of products 9

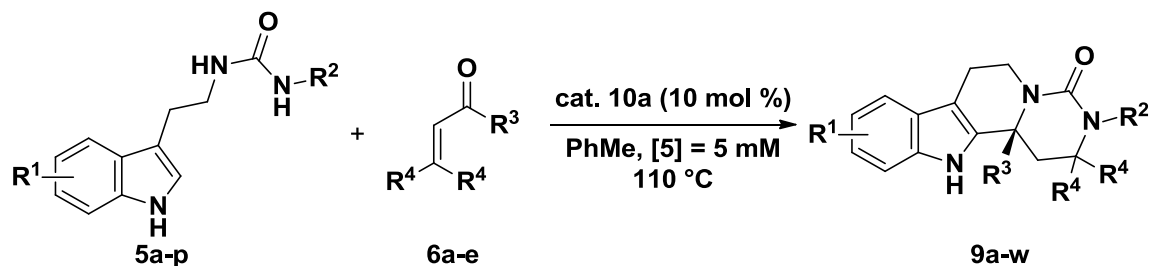

(Thio)urea derivative **5** (1.0 eq.) was suspended in dry PhMe (200 mL/mmol) and enone **6** (5.0 eq.) was added in one portion at room temperature, immediately followed by the addition of catalyst **10a** (0.10 eq.) in one portion. The resulting suspension was heated at 110 °C for the indicated time. The solvent was removed *in vacuo* and the residue was purified by flash column chromatography on silica gel to afford the desired cyclised products **9a-w**. [Racemic samples were synthesised in an analogous manner to general procedure **III**, replacing catalyst **10a** with *p*-TsOH (0.10 eq.).]

### 2.2.1 Synthesis and characterisation of (*R*)-12b-methyl-1,2,3,6,7,12b-hexahydropyrimido[1',6':1,2]pyrido[3,4-*b*]indol-4(12*H*)-one **9a**

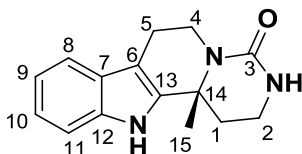

The title compound was synthesised according to general procedure **III**. Urea derivative **5a** (61 mg, 0.30 mmol) was reacted with methyl vinyl ketone **6a** (0.12 mL, 1.5 mmol) in PhMe (60 mL) for 15 hours. The residue was purified by flash column chromatography on silica gel (solvent: CH<sub>2</sub>Cl<sub>2</sub>/MeOH 95/5) to afford product **9a** in 76% yield (58 mg) as a white powder.

73% ee (Chiralcel AD 90:10 Hexane:Isopropanol, 1.0 mL/min, 220 nm,  $t_r$  (major)=19.3 min;  $t_r$  (minor)=38.0 min);  $[\alpha]_D^{23}$  = +50 ( $c$ =0.08, MeOH).

**m.p.** 178-180 °C; **IR** (neat)  $\nu$ =3406, 3284, 3228, 1633, 1508, 743; **<sup>1</sup>H NMR** (500 MHz, [D<sub>6</sub>]DMSO, 25 °C)  $\delta$ =10.92 (br. s., 1H; NH indole), 7.40 (d,  $J$ =8.0 Hz, 1H; H8), 7.32 (d,  $J$ =8.0 Hz, 1H; H11), 7.06 (td,  $J$ =8.0, 1.0 Hz, 1H; H10), 6.97 (td,  $J$ =8.0, 1.0 Hz, 1H; H9), 6.45 (d,  $J$ =4.0 Hz, 1H; NH urea), 4.62 (dd,  $J$ =13.0, 4.5 Hz, 1H; H4'), 3.35-3.30 (m, 1H; H2'), 3.21-3.14 (m, 1H; H2), 2.93 (td,  $J$ =13.0, 4.5 Hz, 1H; H4), 2.66-2.60 (m, 1H; H5'), 2.59-2.53 (m, 1H; H5), 2.40-2.37 (m, 1H; H1'), 1.75 (td,  $J$ =13.0, 5.5 Hz, 1H; H1), 1.54 (s, 3H; H15); **<sup>13</sup>C NMR** (125 MHz, [D<sub>6</sub>]DMSO, 25 °C)  $\delta$ =154.3 (C3), 139.3 (C13), 135.9 (C12), 126.3 (C7), 120.9 (C10), 118.5 (C9), 117.9 (C8), 111.0 (C11), 106.1 (C6), 53.7 (C14), 35.9 (C4), 35.4 (C2), 33.8 (C1), 23.7 (C15), 21.3 (C5); **MS**  $m/z$  (ES+) 533 ([2M+Na]<sup>+</sup>, 100%); **HRMS** (ES+) exact mass calculated for [M+Na]<sup>+</sup> (C<sub>15</sub>H<sub>17</sub>N<sub>3</sub>NaO<sup>+</sup>) requires  $m/z$  278.1264, found  $m/z$  278.1267.

### 2.2.2 Synthesis and characterisation of (*R*)-12b-heptyl-1,2,3,6,7,12b-hexahydropyrimido[1',6':1,2]pyrido[3,4-*b*]indol-4(12*H*)-one **9b**

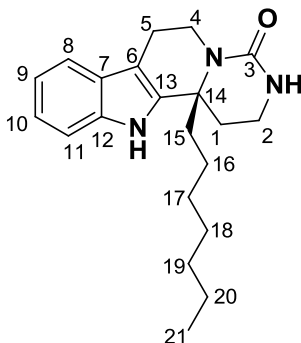

The title compound was synthesised according to general procedure **III**. Urea derivative **5a** (20 mg, 0.10 mmol) was reacted with heptyl vinyl ketone **6c** (77 mg, 0.50 mmol) in PhMe (20 mL) for 15 hours. The residue was purified by flash column chromatography on silica gel (solvent: CH<sub>2</sub>Cl<sub>2</sub>/MeOH 95/5) to afford product **9b** in 59% yield (20 mg) as a white powder.

78% ee (Chiralcel AD 90:10 Hexane:Isopropanol, 1 mL/min, 220 nm,  $t_{r(\text{major})}$ =7.9 min;  $t_{r(\text{minor})}$ =18.8 min);  $[\alpha]_D^{23}$ =+40 ( $c$ =0.16, MeOH).

**m.p.** 112-114 °C; **IR** (neat)  $\nu$ =3405, 3227, 2925, 2853, 1632, 1504, 1449, 740, 703; **<sup>1</sup>H NMR** (500 MHz, [D<sub>6</sub>]DMSO, 25 °C)  $\delta$ =10.85 (br. s., 1H; NH indole), 7.34-7.30 (m, 2H; H8 and H11), 7.06 (t,  $J$ =7.5 Hz, 1H; H10), 6.97 (td,  $J$ =7.5, 1.0 Hz, 1H; H9), 6.42 (d,  $J$ =3.5 Hz, 1H; NH urea), 4.67 (dd,  $J$ =13.0, 5.0 Hz, 1H; H4'), 3.27 (td,  $J$ =12.0, 4.5 Hz, 1H; H2'), 3.12-3.08 (m, 1H; H2), 3.00 (td,  $J$ =13.0, 5.0 Hz, 1H; H4), 2.67-2.63 (m, 1H; H5'), 2.58-2.53 (m, 1H; H5), 2.40-2.36 (m, 1H; H1'), 2.02-1.95 (m, 1H; H15'), 1.88-1.83 (m, 1H; H15), 1.74 (td,  $J$ =12.5, 5.5 Hz, 1H; H1), 1.39-1.33 (m, 1H; H16'), 1.28-1.15 (m, 9H; H16-H20), 0.82 (t,  $J$ =7.0 Hz, 3H; H21); **<sup>13</sup>C NMR** (125 MHz, [D<sub>6</sub>]DMSO, 25 °C)  $\delta$ =154.7 (C3), 137.8 (C13), 135.0 (C12), 126.2 (C7), 120.8 (C10), 118.4 (C9), 117.8 (C8), 111.1 (C11), 107.0 (C6), 56.5 (C14), 38.0 (C15), 37.0 (C4), 35.5 (C2), 32.8 (C1), 31.2 (1C of C17-C20), 29.7 (1C of C17-C20), 28.8 (1C of C17-C20), 24.6 (C16), 22.0 (1C of C17-C20), 21.0 (C5), 13.9 (C21); **MS**  $m/z$  (ES<sup>+</sup>) 701 ([2M+Na]<sup>+</sup>, 100%); **HRMS** (ES<sup>+</sup>) exact mass calculated for [M+Na]<sup>+</sup> (C<sub>21</sub>H<sub>29</sub>N<sub>3</sub>NaO<sup>+</sup>) requires  $m/z$  362.2203, found  $m/z$  362.2204.



### 2.2.3 Synthesis and characterisation of (*R*)-9-methoxy-12b-methyl-1,2,3,6,7,12b-hexahydropyrimido[1',6':1,2]pyrido[3,4-*b*]indol-4(12*H*)-one **9c**

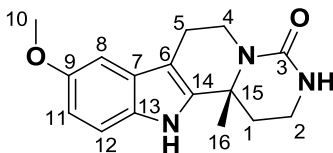

The title compound was synthesised according to general procedure **III**. Urea derivative **5b** (47 mg, 0.20 mmol) was reacted with methyl vinyl ketone **6a** (81  $\mu$ L, 1.0 mmol) in PhMe (40 mL) for 15 hours. The residue was purified by flash column chromatography on silica gel (solvent: CH<sub>2</sub>Cl<sub>2</sub>/MeOH 95/5) to afford product **9c** in 77% yield (44 mg) as a white powder.

60% ee (Chiralcel AD 90:10 Hexane:Isopropanol, 1.0 mL/min, 220 nm,  $t_{r(\text{major})}$ =27.9 min;  $t_{r(\text{minor})}$ =43.8 min);  $[\alpha]_{\text{D}}^{23}$ =+71 ( $c$ =0.16, MeOH).

**m.p.** 140-142 °C; **IR** (neat)  $\nu$ =3410, 3275, 2930, 1626, 1508, 1281, 1160, 800, 754; **<sup>1</sup>H NMR** (500 MHz, [D<sub>6</sub>]DMSO, 25 °C)  $\delta$ =10.74 (br. s., 1H; NH indole), 7.19 (d,  $J$ =8.5 Hz, 1H; H12), 6.90 (d,  $J$ =2.5 Hz, 1H; H8), 6.70 (dd,  $J$ =8.5, 2.5 Hz, 1H; H11), 6.44 (d,  $J$ =3.5 Hz, 1H; NH urea), 4.61 (dd,  $J$ =13.0, 4.5 Hz, 1H; H4'), 3.75 (s, 3H; H10), 3.33-3.29 (m, 1H; H2'), 3.18-3.12 (m, 1H; H2), 2.91 (td,  $J$ =13.0, 4.5 Hz, 1H; H4), 2.61-2.53 (m, 2H; H5), 2.37-2.34 (m, 1H; H1'), 1.75 (td,  $J$ =13.0, 5.0 Hz, 1H; H1), 1.52 (s, 3H; H16); **<sup>13</sup>C NMR** (125 MHz, [D<sub>6</sub>]DMSO, 25 °C)  $\delta$ =154.3 (C3), 153.1 (C9), 140.0 (C14), 131.0 (C13), 126.6 (C7), 111.6 (C12), 110.7 (C11), 106.0 (C6), 100.1 (C8), 55.4 (C10), 53.7 (C15), 35.9 (C4), 21.4 (C5), 35.4 (C2), 33.8 (C1), 23.7 (C16); **MS**  $m/z$  (ES+) 593 ([2M+Na]<sup>+</sup>, 100%); **HRMS** (ES+) exact mass calculated for [M+Na]<sup>+</sup> (C<sub>16</sub>H<sub>19</sub>N<sub>3</sub>NaO<sub>2</sub><sup>+</sup>) requires  $m/z$  308.1369, found  $m/z$  308.1370.

### 2.2.4 Synthesis and characterisation of (*R*)-9-fluoro-12b-methyl-1,2,3,6,7,12b-hexahydropyrimido[1',6':1,2]pyrido[3,4-*b*]indol-4(12*H*)-one **9d**

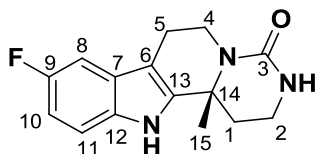

The title compound was synthesised according to general procedure **III**. Urea derivative **5c** (15 mg, 0.07 mmol) was reacted with methyl vinyl ketone **6a** (28  $\mu$ L, 0.34 mmol) in PhMe (14 mL) for 15 hours. The residue was purified by flash column chromatography on silica gel (solvent: CH<sub>2</sub>Cl<sub>2</sub>/MeOH 95/5) to afford product **9d** in 75% yield (14 mg) as a yellow powder.

70% ee (Chiralcel AD 90:10 Hexane:Isopropanol, 1.0 mL/min, 220 nm,  $t_{r(\text{major})}$ =22.6 min;  $t_{r(\text{minor})}$ =49.3 min);  $[\alpha]_{\text{D}}^{23}$ =+99 ( $c$ =0.09, MeOH).

**m.p.** 168-170 °C; **IR** (neat)  $\nu$ =3401, 3283, 2926, 1630, 1509, 1449, 1158, 801, 754; **<sup>1</sup>H NMR** (500 MHz, [D<sub>6</sub>]DMSO, 25 °C)  $\delta$ =11.04 (br. s., 1H; NH indole), 7.29 (dd,  $J$ =9.0, 4.5 Hz, 1H;

H10), 7.09 (dd,  $J=9.5, 2.0$  Hz, 1H; H8), 6.89 (td,  $J=9.0, 2.5$  Hz, 1H; H11), 6.46 (d,  $J=4.0$  Hz, 1H; NH urea), 4.61 (dd,  $J=13.0, 4.5$  Hz, 1H; H4'), 3.20-3.10 (m, 1H; H2), 3.36-3.31 (m, 1H; H2'), 2.92 (td,  $J=13.0, 4.5$  Hz, 1H; H4), 2.63-2.57 (m, 1H; H5'), 2.38-2.35 (m, 1H; H1'), 2.55-2.51 (m, 1H; H5), 1.75 (td,  $J=13.0, 5.5$  Hz, 1H; H1); 1.53 (s, 3H; H15),  $^{13}\text{C}$  NMR (125 MHz,  $[\text{D}_6]\text{DMSO}$ , 25 °C)  $\delta=156.8$  (d,  $J=230$  Hz, C9), 154.3 (C3), 141.5 (C13), 132.6 (C12), 126.5 (d,  $J=10$  Hz, C7), 111.8 (d,  $J=10$  Hz, C10), 108.7 (d,  $J=26$  Hz, C11), 106.6 (C6), 102.8 (d,  $J=24$  Hz, C8), 53.8 (C14), 35.8 (C4), 35.3 (C2), 33.7 (C1), 23.7 (C15), 21.2 (C5); MS  $m/z$  (ES+) 569 ( $[\text{2M}+\text{Na}]^+$ , 100%); HRMS (ES+) exact mass calculated for  $[\text{M}+\text{Na}]^+$  ( $\text{C}_{15}\text{H}_{16}\text{FN}_3\text{NaO}^+$ ) requires  $m/z$  296.1170, found  $m/z$  296.1175.

### 2.2.5 Synthesis and characterisation of (*R*)-9-chloro-12b-methyl-1,2,3,6,7,12b-hexahydropyrimido[1',6':1,2]pyrido[3,4-*b*]indol-4(12*H*)-one **9e**

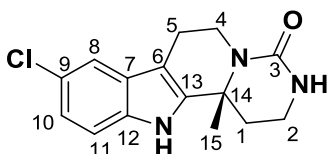

The title compound was synthesised according to general procedure **III**. Urea derivative **5d** (24 mg, 0.10 mmol) was reacted with methyl vinyl ketone **6a** (41  $\mu\text{L}$ , 0.50 mmol) in PhMe (20 mL) for 15 hours. The residue was purified by flash column chromatography on silica gel (solvent:  $\text{CH}_2\text{Cl}_2/\text{MeOH}$  95/5) to afford product **9e** in 77% yield (23 mg) as a pale brown powder.

68% ee (Chiralcel AD 90:10 Hexane:Isopropanol, 1.0 mL/min, 300 nm,  $t_{\text{r}}$  (major)=21.4 min;  $t_{\text{r}}$  (minor)=51.9 min);  $[\alpha]_{\text{D}}^{23}=+96$  ( $c=0.09$ , MeOH).

**m.p.** 160-162 °C; **IR** (neat)  $\nu=3305, 3188, 2917, 1632, 1507, 1433, 800, 759$ ;  $^1\text{H}$  NMR (500 MHz,  $[\text{D}_6]\text{DMSO}$ , 25 °C)  $\delta=11.16$  (br. s., 1H; NH indole), 7.44 (d,  $J=2.0$  Hz, 1H; H8), 7.32 (d,  $J=8.5$  Hz, 1H; H11), 7.06 (dd,  $J=8.5, 2.0$  Hz, 1H; H10), 6.47 (br. s., 1H; NH urea), 4.61 (dd,  $J=13.0, 4.5$  Hz, 1H; H4'), 3.32-3.37 (m, 1H; H2'); 3.20-3.10 (m, 1H; H2), 2.91 (td,  $J=13.0, 4.5$  Hz, 1H; H4), 2.67-2.58 (m, 1H; H5'), 2.57-2.53 (m, 1H; H5), 2.38-2.35 (m, 1H; H1'), 1.75 (td,  $J=13.0, 5.5$  Hz, 1H; H1), 1.53 (s, 3H; H15);  $^{13}\text{C}$  NMR (125 MHz,  $[\text{D}_6]\text{DMSO}$ , 25 °C)  $\delta=154.2$  (C3), 141.2 (C13), 134.4 (C12), 127.4 (C7), 123.1 (C9), 120.7 (C10), 117.3 (C8), 112.5 (C11), 106.3 (C6), 53.7 (C14), 35.8 (C4), 35.3 (C2), 33.6 (C1), 23.6 (C15), 21.1 (C5); MS  $m/z$  (ES-) 288 ( $[\text{M}-\text{H}]^-$ , 100%); HRMS (ES+) exact mass calculated for  $[\text{M}+\text{Na}]^+$  ( $\text{C}_{15}\text{H}_{16}\text{ClN}_3\text{NaO}^+$ ) requires  $m/z$  312.0874, found  $m/z$  312.0869.

## 2.2.6 Synthesis and characterisation of (*R*)-10-fluoro-12b-methyl-1,2,3,6,7,12b-hexahydropyrimido[1',6':1,2]pyrido[3,4-*b*]indol-4(12*H*)-one 9f

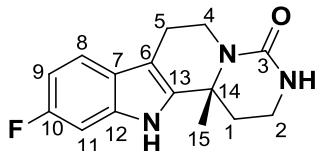

The title compound was synthesised according to general procedure **III**. Urea derivative **5e** (20 mg, 0.09 mmol) was reacted with methyl vinyl ketone **6a** (37  $\mu$ L, 0.45 mmol) in PhMe (18 mL) for 15 hours. The residue was purified by flash column chromatography on silica gel (solvent: CH<sub>2</sub>Cl<sub>2</sub>/MeOH 95/5) to afford product **9f** in 73% yield (20 mg) as a yellow oil.

67% ee (Chiralcel AD 90:10 Hexane:Isopropanol, 1.0 mL/min, 220 nm,  $t_{r(\text{major})}$ =20.8 min;  $t_{r(\text{minor})}$ =42.0 min);  $[\alpha]_{\text{D}}^{23}$ =+70 ( $c$ =0.13, MeOH).

**IR** (neat)  $\nu$ =3275, 2966, 2924, 2854, 1629, 1505, 1472, 1378, 1282, 1259, 1114, 954; **<sup>1</sup>H NMR** (500 MHz, [D<sub>6</sub>]DMSO, 25 °C)  $\delta$ =11.06 (br. s., 1H; NH indole). 7.39 (dd,  $J$ =8.5, 5.5 Hz, 1H; H8), 7.09 (dd,  $J$ =10.0, 2.0 Hz, 1H; H11), 6.83 (ddd,  $J$ =10.0, 8.5, 2.0 Hz, 1H; H9), 6.45 (d,  $J$ =4.0 Hz, 1H; NH urea), 4.61 (dd,  $J$ =12.5, 4.0 Hz, 1H; H4'), 3.19-3.11 (m, 1H; H2), 3.38-3.31 (m, 1H; H2'), 2.91 (td,  $J$ =12.5, 4.0 Hz, 1H; H4), 2.66-2.59 (m, 1H; H5'), 2.57-2.53 (m, 1H; H5), 2.38-2.35 (m, 1H; H1'), 1.74 (td,  $J$ =13.0, 5.5 Hz, 1H; H1), 1.52 (s, 3H; H15); **<sup>13</sup>C NMR** (125 MHz, [D<sub>6</sub>]DMSO, 25 °C)  $\delta$ =158.7 (d,  $J$ =233 Hz, C10), 154.3 (C3), 139.9 (C13), 135.8 (d,  $J$ =10 Hz, C12), 123.1 (C7), 118.9 (d,  $J$ =10 Hz, C8), 106.7 (d,  $J$ =25 Hz, C9), 106.4 (C6), 97.2 (d,  $J$ =25 Hz, C11), 53.7 (C14), 35.8 (C4), 35.3 (C2), 33.7 (C1), 23.6 (C15), 21.2 (C5); **MS**  $m/z$  (ES+) 547 ([2M+H]<sup>+</sup>, 100%); **HRMS** (ES+) exact mass calculated for [M+Na]<sup>+</sup> (C<sub>15</sub>H<sub>16</sub>FN<sub>3</sub>NaO<sup>+</sup>) requires  $m/z$  296.1170, found  $m/z$  296.1164.

## 2.2.7 Synthesis and characterisation of (*R*)-11,12b-dimethyl-1,2,3,6,7,12b-hexahydropyrimido[1',6':1,2]pyrido[3,4-*b*]indol-4(12*H*)-one 9g

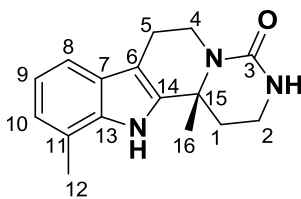

The title compound was synthesised according to general procedure **III**. Urea derivative **5f** (65 mg, 0.30 mmol) was reacted with methyl vinyl ketone **6a** (0.12 mL, 1.5 mmol) in PhMe (60 mL) for 15 hours. The residue was purified by flash column chromatography on silica gel (solvent: CH<sub>2</sub>Cl<sub>2</sub>/MeOH 95/5) to afford product **9g** in 78% yield (63 mg) as a white powder.

92% ee (Chiralcel AD 90:10 Hexane:Isopropanol, 1.0 mL/min, 220 nm,  $t_{r(\text{major})}$ =12.2 min;  $t_{r(\text{minor})}$ =14.4 min);  $[\alpha]_{\text{D}}^{23}$ =+133 ( $c$ =0.22, MeOH).

**m.p.** 170-172 °C; **IR** (neat)  $\nu$ =3284, 3218, 2972, 1630, 1506, 1439, 1351, 1153, 778, 745; **<sup>1</sup>H NMR** (500 MHz, [D<sub>6</sub>]DMSO, 25 °C)  $\delta$ =10.57 (br. s., 1H; NH indole), 7.22 (d,  $J$ =7.5 Hz, 1H; H8), 6.92-6.85 (m, 2H; H9 and H10), 6.43 (d,  $J$ =4.0 Hz, 1H; NH urea), 4.61 (dd,  $J$ =13.0, 4.0 Hz, 1H; H4'), 3.41-3.37 (m, 1H; H2'), 3.20-3.17 (m, 1H; H2), 2.92 (td,  $J$ =13.0, 4.0 Hz, 1H; H4), 2.66-2.54 (m, 3H; H1' and H5), 2.46 (s, 3H; H12), 1.74 (td,  $J$ =13.0, 5.5 Hz, 1H; H1), 1.57 (s, 3H; H16); **<sup>13</sup>C NMR** (125 MHz, [D<sub>6</sub>]DMSO, 25 °C)  $\delta$ =154.3 (C3), 139.1 (C14), 135.4 (C13), 125.9 (C7), 120.2 (C11), 121.6 (C10), 118.7 (C9), 115.4 (C8), 106.6 (C6), 53.8 (C15), 35.8 (C4), 35.4 (C2), 33.6 (C1), 23.5 (C16), 21.4 (C5), 17.0 (C12); **MS**  $m/z$  (ES+) 561 ([2M+Na]<sup>+</sup>, 100%); **HRMS** (ES+) exact mass calculated for [M+Na]<sup>+</sup> (C<sub>16</sub>H<sub>19</sub>N<sub>3</sub>NaO<sup>+</sup>) requires  $m/z$  292.1420, found  $m/z$  292.1419.

### 2.2.8 Synthesis and characterisation of (*R*)-12b-ethyl-11-methyl-1,2,3,6,7,12b-hexahydropyrimido[1',6':1,2]pyrido[3,4-*b*]indol-4(12*H*)-one **9h**

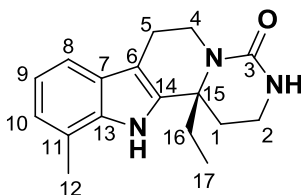

The title compound was synthesised according to general procedure **III**. Urea derivative **5f** (65 mg, 0.30 mmol) was reacted with ethyl vinyl ketone **6b** (0.15 mL, 1.5 mmol) in PhMe (60 mL) for 15 hours. The residue was purified by flash column chromatography on silica gel (solvent: CH<sub>2</sub>Cl<sub>2</sub>/MeOH 95/5) to afford product **9h** in 74% yield (63 mg) as a brown powder.

92% ee (Chiralcel AD 95:5 Hexane:Isopropanol, 1.0 mL/min, 220 nm,  $t_r$  (major)=29.9 min;  $t_r$  (minor)=50.9 min);  $[\alpha]_D^{23}$ =+103 ( $c$ =0.13, MeOH).

**m.p.** 158-160 °C; **IR** (neat)  $\nu$ =3412, 3283, 2967, 2936, 1632, 1505, 798, 741; **<sup>1</sup>H NMR** (500 MHz, [D<sub>6</sub>]DMSO, 25 °C)  $\delta$ =10.46 (br. s., 1H; NH indole), 7.23 (d,  $J$ =7.5 Hz, 1H; H8), 6.90-6.85 (m, 2H; H9 and H10), 6.41 (d,  $J$ =3.0 Hz, 1H; NH urea), 4.68 (dd,  $J$ =13.0, 4.5 Hz, 1H; H4'), 3.32-3.21 (m, 1H; H2'), 3.13-3.06 (m, 1H; H2), 3.01 (td,  $J$ =13.0, 4.5 Hz, 1H; H4), 2.65-2.60 (m, 1H; H5'), 2.58-2.54 (m, 2H; H1' and H5), 2.47 (s, 3H; H12), 2.03 (q,  $J$ =7.5 Hz, 2H; H16), 1.78 (td,  $J$ =13.0, 5.5 Hz, 1H; H1), 0.88 (t,  $J$ =7.5 Hz, 3H; H17); **<sup>13</sup>C NMR** (125 MHz, [D<sub>6</sub>]DMSO, 25 °C)  $\delta$ =155.0 (C3), 137.4 (C14), 135.5 (C13), 126.0 (C7), 121.6 (C10), 120.2 (C11), 118.6 (C9), 115.3 (C8), 107.8 (C6), 57.0 (C15), 37.2 (C4), 35.5 (C2), 32.6 (C1), 30.8 (C16), 21.0 (C5), 17.1 (C12), 9.7 (C17); **MS**  $m/z$  (ES+) 589 ([2M+Na]<sup>+</sup>, 100%); **HRMS** (ES+) exact mass calculated for [M+Na]<sup>+</sup> (C<sub>17</sub>H<sub>21</sub>N<sub>3</sub>NaO<sup>+</sup>) requires  $m/z$  306.1577, found  $m/z$  306.1564.

## 2.2.9 Synthesis and characterisation of (*R*)-11-methyl-12b-heptyl-1,2,3,6,7,12b-hexahydropyrimido[1',6':1,2]pyrido[3,4-*b*]indol-4(12*H*)-one **9i**

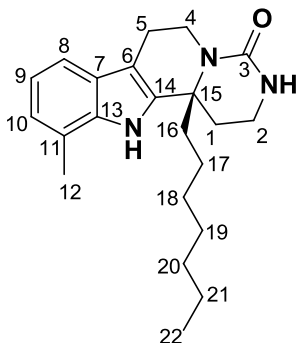

The title compound was synthesised according to general procedure **III**. Urea derivative **5f** (22 mg, 0.10 mmol) was reacted with heptyl vinyl ketone **6c** (77 mg, 0.50 mmol) in PhMe (20 mL) for 15 hours. The residue was purified by flash column chromatography on silica gel (solvent: CH<sub>2</sub>Cl<sub>2</sub>/MeOH 95/5) to afford product **9i** in 54% yield (19 mg) as a yellow powder.

90% ee (Chiralcel AD 90:10 Hexane:Isopropanol, 1.0 mL/min, 220 nm,  $t_r$  (major)=7.7 min;  $t_r$  (minor)=11.8 min);  $[\alpha]_D^{23}=+42$  ( $c=0.25$ , MeOH).

**m.p.** 187-189 °C; **IR** (neat)  $\nu=3309, 3286, 3195, 2921, 2853, 1633, 1513, 1449, 1026, 746, 700$ ; **<sup>1</sup>H NMR** (500 MHz, [D<sub>6</sub>]DMSO, 25 °C)  $\delta=10.47$  (br. s., 1H; NH indole), 7.31 (d,  $J=7.5$  Hz, 1H; H8), 6.90-6.85 (m, 2H; H9 and H10), 6.41 (d,  $J=3.0$  Hz, 1H; NH urea), 4.68 (dd,  $J=13.0, 5.0$  Hz, 1H; H4'), 3.33-3.25 (m, 1H; H2'), 3.12-3.10 (m, 1H; H2), 2.97 (td,  $J=13.0, 5.0$  Hz, 1H; H4), 2.66-2.60 (m, 1H; H5'), 2.56-2.51 (m, 1H; H5), 2.50-2.48 (m, 1H; H1'), 2.47 (s, 3H; H12), 2.00-1.94 (m, 2H; H16), 1.78 (td,  $J=13.0, 5.5$  Hz, 1H; H1), 1.40-1.33 (m, 1H; H17'), 1.25-1.19 (m, 9H; H17-H21), 0.82 (t,  $J=7.0$  Hz, 3H; H22); **<sup>13</sup>C NMR** (125 MHz, [D<sub>6</sub>]DMSO, 25 °C)  $\delta=154.9$  (C3), 137.7 (C14), 135.5 (C13), 125.9 (C7), 121.6 (C10), 120.2 (C11), 118.6 (C9), 115.3 (C8), 107.6 (C6), 56.7 (C15), 38.1 (C16), 37.2 (C4), 35.5 (C2), 33.1 (C1), 31.2 (1C of C18-C21), 29.6 (1C of C18-C21), 28.5 (1C of C18-C21), 24.6 (C17), 22.0 (1C of C18-C21), 21.0 (C5), 17.1 (C12), 13.9 (C22); **MS**  $m/z$  (ES+) 354 ([M+H]<sup>+</sup>, 100%); **HRMS** (ES+) exact mass calculated for [M+Na]<sup>+</sup> (C<sub>22</sub>H<sub>31</sub>N<sub>3</sub>NaO<sup>+</sup>) requires  $m/z$  376.2359, found  $m/z$  376.2356.

### 2.2.10 Synthesis and characterisation of (*R*)-11-ethyl-12b-methyl-1,2,3,6,7,12b-hexahydropyrimido[1',6':1,2]pyrido[3,4-*b*]indol-4(12*H*)-one **9j**

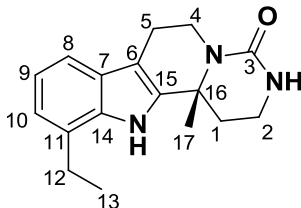

The title compound was synthesised according to general procedure **III**. Urea derivative **5g** (23 mg, 0.10 mmol) was reacted with methyl vinyl ketone **6a** (41  $\mu$ L, 0.50 mmol) in PhMe (20 mL) for 15 hours. The residue was purified by flash column chromatography on silica gel (solvent: CH<sub>2</sub>Cl<sub>2</sub>/MeOH 95/5) to afford product **9j** in 71% yield (20 mg) as a pale brown powder.

92% ee (Chiralcel AD 90:10 Hexane:Isopropanol, 1.0 mL/min, 220 nm,  $t_r$  (major)=27.6 min;  $t_r$  (minor)=38.8 min);  $[\alpha]_D^{23}$ =+98 ( $c$ =0.12, MeOH).

**m.p.** 288-290 °C (dec.); **IR** (neat)  $\nu$ =3412, 3285, 2967, 2931, 1633, 1506, 1352, 1153, 794; **<sup>1</sup>H NMR** (500 MHz, [D<sub>6</sub>]DMSO, 25 °C)  $\delta$ =10.57 (br. s., 1H; NH indole), 7.22 (d,  $J$ =7.5 Hz, 1H; H8), 6.93-6.88 (m, 2H; H9 and H10), 6.43 (d,  $J$ =4.0 Hz, 1H; NH urea), 4.61 (dd,  $J$ =13.0, 4.5 Hz, 1H; H4'), 3.38-3.22 (m, 1H; H2'), 3.21-3.12 (m, 1H; H2), 2.92 (td,  $J$ =13.0, 4.5 Hz, 1H; H4), 2.86 (q,  $J$ =7.5 Hz, 2H; H12), 2.60-2.55 (m, 3H; H1' and H5), 1.73 (td,  $J$ =13.0, 5.5 Hz, 1H; H1), 1.57 (s, 3H; H17), 1.27 (t,  $J$ =7.5 Hz, 3H; H13); **<sup>13</sup>C NMR** (125 MHz, [D<sub>6</sub>]DMSO, 25 °C)  $\delta$ =154.3 (C3), 139.0 (C15), 134.6 (C14), 126.6 (C11), 126.1 (C7), 119.7 (C10), 118.8 (C9), 115.5 (C8), 106.6 (C6), 53.8 (C16), 35.8 (C4), 35.4 (C2), 33.6 (C1), 23.7 (C17), 23.4 (C12), 21.4 (C5), 14.5 (C13); **MS**  $m/z$  (ES+) 567 ([2M+H]<sup>+</sup>, 100%); **HRMS** (ES+) exact mass calculated for [M+Na]<sup>+</sup> (C<sub>17</sub>H<sub>21</sub>N<sub>3</sub>NaO<sup>+</sup>) requires  $m/z$  306.1577, found  $m/z$  306.1577.

### 2.2.11 Synthesis and characterisation of (*R*)-2,2,11,12b-tetramethyl-1,2,3,6,7,12b-hexahydropyrimido[1',6':1,2]pyrido[3,4-*b*]indol-4(12*H*)-one **9k**

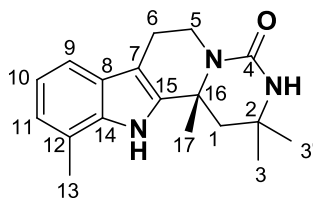

The title compound was synthesised according to general procedure **III**. Urea derivative **5f** (65 mg, 0.30 mmol) was reacted with mesityl oxide **6e** (0.17 mL, 1.5 mmol) in PhMe (60 mL) for 15 hours. The residue was purified by flash column chromatography on silica gel (solvent: CH<sub>2</sub>Cl<sub>2</sub>/MeOH 95/5) to afford product **9k** in 78% yield (70 mg) as an off-white powder.

43% ee (Chiralcel AD 90:10 Hexane:Isopropanol, 0.7 mL/min, 220 nm,  $t_r$  (minor)=16.7 min;  $t_r$  (major)=18.6 min);  $[\alpha]_D^{23}$ =+91 ( $c$ =0.09, MeOH).

**m.p.** 288-290 °C (dec.); **IR** (neat)  $\nu$ =3261, 3193, 2962, 2928, 1608, 1484, 1421, 1185, 778, 744; **<sup>1</sup>H NMR** (500 MHz, [D<sub>6</sub>]DMSO, 25 °C)  $\delta$ =10.57 (s, 1H; NH indole), 7.20 (d,  $J$ =7.5 Hz, 1H; H9), 6.94-6.79 (m, 2H; H10 and H11), 6.46 (s, 1H; NH urea), 4.55 (dd,  $J$ =13.0, 5.0 Hz, 1H; H5'), 3.04 (ddd,  $J$ =13.0, 11.5, 5.0 Hz, 1H; H5), 2.65-2.55 (m, 2H; H6), 2.46 (s, 3H; H13), 2.34 (d,  $J$ =14.0, 1H; H1'), 2.23 (d,  $J$ =14.0, 1H; H1), 1.63 (s, 3H; H17), 1.26 (s, 3H; H3'), 0.92 (s, 3H; H3); **<sup>13</sup>C NMR** (125 MHz, [D<sub>6</sub>]DMSO, 25 °C)  $\delta$ =155.3 (C4), 139.6 (C15), 135.2 (C14), 126.1 (C8), 121.5 (C11), 120.2 (C12), 118.6 (C10), 115.3 (C9), 106.1 (C7), 54.1 (C16), 48.3 (C2), 45.8 (C1), 36.4 (C5), 30.6 (C3'), 30.5 (C3), 27.1 (C17), 20.9 (C6), 17.0 (C13); **MS**  $m/z$  (ES+) 595 ([2M+H]<sup>+</sup>, 100%); **HRMS** (ES+) exact mass calculated for [M+Na]<sup>+</sup> (C<sub>18</sub>H<sub>23</sub>N<sub>3</sub>NaO<sup>+</sup>) requires  $m/z$  320.1733, found  $m/z$  320.1724.

### 2.2.12 Synthesis and characterisation of (*R*)-12b-methyl-1,2,3,6,7,12b-hexahydropyrimido[1',6':1,2]pyrido[3,4-*b*]indol-4(12*H*)-thione **9l**

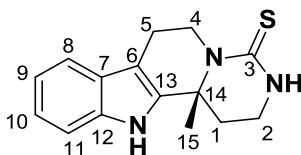

The title compound was synthesised according to general procedure **III**. Thiourea derivative **5h** (66 mg, 0.30 mmol) was reacted with methyl vinyl ketone **6a** (0.12 mL, 1.5 mmol) in PhMe (60 mL) for 15 hours. The residue was purified by flash column chromatography on silica gel (solvent: CH<sub>2</sub>Cl<sub>2</sub>/MeOH 95/5) to afford product **9l** in 72% yield (59 mg) as a white powder.

31% ee (Chiralcel AD 90:10 Hexane:Isopropanol, 1.0 mL/min, 240 nm,  $t_r$  (major)=15.3 min;  $t_r$  (minor)=33.5 min);  $[\alpha]_D^{23}$ =+38 ( $c$ =0.40, MeOH).

**m.p.** 153-155 °C; **IR** (neat)  $\nu$ =3403, 3236, 2975, 2933, 1521, 1493, 1328, 1176, 748; **<sup>1</sup>H NMR** (500 MHz, [D<sub>6</sub>]DMSO, 25 °C)  $\delta$ =10.98 (br. s., 1H; NH indole), 8.26 (d,  $^3J$ (H,H)=4.5 Hz, 1H; NH urea), 7.43 (d,  $^3J$ (H,H)=7.5 Hz, 1H; H8), 7.33 (d,  $^3J$ (H,H)=8.0 Hz, 1H; H11), 7.08 (td,  $^3J$ (H,H)=8.0, 1.5 Hz, 1H; H10), 6.99 (td,  $^3J$ (H,H)=7.5, 1.5 Hz, 1H; H9), 5.66-5.61 (m, 1H; H4'), 3.34-3.26 (m, 2H; H2' and H4), 3.23-3.11 (m, 1H; H2), 2.69-2.65 (m, 2H; H5), 2.53-2.49 (m, 1H; H1'), 1.77 (td,  $^3J$ (H,H)=13.0, 5.5 Hz, 1H; H1), 1.61 (s, 3H; H15); **<sup>13</sup>C NMR** (125 MHz, [D<sub>6</sub>]DMSO, 25 °C)  $\delta$ =176.5 (C3), 138.0 (C13), 136.1 (C12), 126.90 (C7), 121.1 (C10), 118.6 (C9), 118.0 (C8), 111.1 (C11), 106.4 (C6), 55.3 (C14), 43.6 (C4), 36.2 (C2), 33.0 (C1), 24.0 (C15), 20.8 (C5); **MS**  $m/z$  (ES+) 565 ([2M+Na]<sup>+</sup>, 100%); **HRMS** (ES+) exact mass calculated for [M+Na]<sup>+</sup> (C<sub>15</sub>H<sub>17</sub>N<sub>3</sub>NaS<sup>+</sup>) requires  $m/z$  294.1035, found  $m/z$  294.1030.

### 2.2.13 Synthesis and characterisation of (*R*)-3-ethyl-12b-methyl-1,2,3,6,7,12b-hexahydropyrimido[1',6':1,2]pyrido[3,4-*b*]indol-4(12*H*)-one **9m**

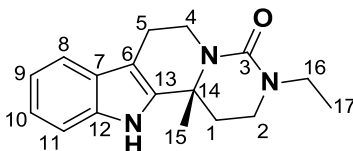

The title compound was synthesised according to general procedure **III**. Urea derivative **5i** (69 mg, 0.30 mmol) was reacted with methyl vinyl ketone **6a** (0.12 mL, 1.5 mmol) in PhMe (60 mL) for 15 hours. The residue was purified by flash column chromatography on silica gel (solvent: CH<sub>2</sub>Cl<sub>2</sub>/Acetone 95/5) to afford product **9m** in 73% yield (62 mg) as a yellow powder.

83% ee (Chiralcel AD 90:10 Hexane:Isopropanol, 1.0 mL/min, 220 nm,  $t_{r(\text{major})}$ =18.2 min;  $t_{r(\text{minor})}$ =32.9 min);  $[\alpha]_{\text{D}}^{23}$ =+110 ( $c$ =0.12, MeOH).

**m.p.** 263-265 °C (dec.); **IR** (neat)  $\nu$ =3406, 3233, 3195, 2972, 2928, 1604, 1403, 1453, 1352, 1297, 1279, 741; **<sup>1</sup>H NMR** (500 MHz, [D<sub>6</sub>]DMSO, 25 °C)  $\delta$ =10.92 (br. s., 1H; NH indole), 7.40 (d,  $J$ =8.0 Hz, 1H; H8), 7.31 (d,  $J$ =8.0 Hz, 1H; H11), 7.06 (td,  $J$ =8.0, 1.5 Hz, 1H; H10), 6.97 (td,  $J$ =8.0, 1.5 Hz, 1H; H9), 4.64 (dd,  $J$ =13.0, 4.5 Hz, 1H; H4'), 3.48 (td,  $J$ =12.5 Hz, 1H; H2'), 3.41-3.35 (m, 1H; H16'), 3.27-3.15 (m, 2H; H16 and H2), 2.93 (td,  $J$ =13.0, 4.5 Hz, 1H; H4), 2.64-2.59 (m, 2H; H5), 2.49-2.45 (m, 1H; H1'), 1.83 (td,  $J$ =12.5, 5.5 Hz, 1H; H1), 1.52 (s, 3H; H15), 0.71 (t,  $J$ =7.0 Hz, 3H; H17); **<sup>13</sup>C NMR** (125 MHz, [D<sub>6</sub>]DMSO, 25 °C)  $\delta$ =153.8 (C3), 139.3 (C13), 136.0 (C12), 126.2 (C7), 120.9 (C10), 118.5 (C9), 117.9 (C8), 111.0 (C11), 106.2 (C6), 53.8 (C14), 42.2 (C16), 41.3 (C2), 36.6 (C4), 33.7 (C1), 23.4 (C15), 21.3 (C5), 12.6 (C17); **MS**  $m/z$  (ES+) 589 ([2M+Na]<sup>+</sup>, 100%); **HRMS** (ES+) exact mass calculated for [M+Na]<sup>+</sup> (C<sub>17</sub>H<sub>21</sub>N<sub>3</sub>NaO<sup>+</sup>) requires  $m/z$  306.1577, found  $m/z$  306.1575.

### 2.2.14 Synthesis and characterisation of (*R*)-3,12b-diethyl-1,2,3,6,7,12b-hexahydropyrimido[1',6':1,2]pyrido[3,4-*b*]indol-4(12*H*)-one **9n**

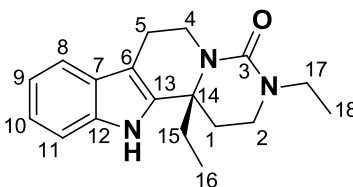

The title compound was synthesised according to general procedure **III**. Urea derivative **5i** (69 mg, 0.30 mmol) was reacted with ethyl vinyl ketone **6b** (0.15 mL, 1.5 mmol) in PhMe (60 mL) for 15 hours. The residue was purified by flash column chromatography on silica gel (solvent: CH<sub>2</sub>Cl<sub>2</sub>/Acetone 95/5) to afford product **9n** in 73% yield (65 mg) as a pale yellow powder.

86% ee (Chiralcel AD 90:10 Hexane:Isopropanol, 1.0 mL/min, 220 nm,  $t_{r(\text{major})}$ =13.6 min;  $t_{r(\text{minor})}$ =22.5 min);  $[\alpha]_{\text{D}}^{23}$ =+144 ( $c$ =0.07, MeOH).



**m.p.** 188-190 °C; **IR** (neat)  $\nu$ =3234, 2971, 2933, 1604, 1501, 1452, 1348, 741; **<sup>1</sup>H NMR** (500 MHz, [D<sub>6</sub>]DMSO, 25 °C)  $\delta$ =10.85 (br. s., 1H; NH indole), 7.41 (d,  $J$ =8.0 Hz, 1H; H8), 7.33 (d,  $J$ =8.0 Hz, 1H; H11), 7.06 (td,  $J$ =8.0, 1.5 Hz, 1H; H10), 6.97 (td,  $J$ =8.0, 1.5 Hz, 1H; H9), 4.70 (dd,  $J$ =13.0, 4.5 Hz, 1H; H4'), 3.43-3.35 (m, 1H; H2'), 3.41-3.29 (m, 1H; H17'), 3.26-3.20 (m, 1H; H17), 3.19-3.11 (m, 1H; H2), 3.04 (td,  $J$ =13.0, 4.5 Hz, 1H; H4), 2.67-2.63 (m, 1H; H5'), 2.60-2.52 (m, 1H; H5), 2.47-2.42 (m, 1H; H1'), 2.02-1.95 (m, 1H; H15'), 1.94-1.90 (m, 1H; H15), 1.86 (td,  $J$ =13.0, 4.0 Hz, 1H; H1), 1.02 (t,  $J$ =7.5 Hz, 3H; H18), 0.89 (t,  $J$ =7.5 Hz, 3H; H16); **<sup>13</sup>C NMR** (125 MHz, [D<sub>6</sub>]DMSO, 25 °C)  $\delta$ =154.2 (C3), 137.6 (C13), 136.1 (C12), 126.2 (C7), 120.9 (C10), 118.4 (C9), 117.8 (C8), 111.1 (C11), 107.2 (C6), 56.9 (C14), 42.2 (C17), 40.5 (C2), 37.6 (C4), 32.2 (C1), 30.5 (C15), 21.0 (C5), 12.5 (C18), 9.5 (C16); **MS**  $m/z$  (ES+) 617 ([2M+Na]<sup>+</sup>, 100%); **HRMS** (ES+) exact mass calculated for [M+Na]<sup>+</sup> (C<sub>18</sub>H<sub>23</sub>N<sub>3</sub>NaO<sup>+</sup>) requires  $m/z$  320.1733, found  $m/z$  320.1731.

### 2.2.15 Synthesis and characterisation of (*R*)-3,11-diethyl-12b-methyl-1,2,3,6,7,12b-hexahydropyrimido[1',6':1,2]pyrido[3,4-*b*]indol-4(12*H*)-one **9o**

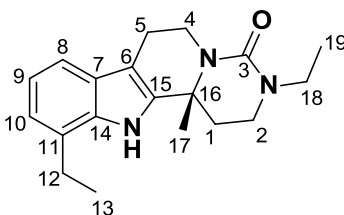

The title compound was synthesised according to general procedure **III**. Urea derivative **5j** (78 mg, 0.30 mmol) was reacted with methyl vinyl ketone **6a** (0.12 mL, 1.5 mmol) in PhMe (60 mL) for 15 hours. The residue was purified by flash column chromatography on silica gel (solvent: CH<sub>2</sub>Cl<sub>2</sub>/MeOH 95/5) to afford product **9o** in 76% yield (71 mg) as a red oil.

90% ee (Chiralcel AD 90:10 Hexane:Isopropanol, 1.0 mL/min, 220 nm,  $t_r$  (major)=8.5 min;  $t_r$  (minor)=12.0 min);  $[\alpha]_D^{23}$ =+109 ( $c$ =0.78, MeOH).

**IR** (neat)  $\nu$ =3262, 2967, 2931, 2872, 1604, 1503, 1455, 1355, 1277, 1176, 747; **<sup>1</sup>H NMR** (500 MHz, [D<sub>6</sub>]DMSO, 25 °C)  $\delta$ =10.57 (br. s., 1H; NH indole), 7.22 (d,  $J$ =7.5 Hz, 1H; H8), 6.93-6.88 (m, 2H; H9 and H10), 4.65 (dd,  $J$ =13.0, 5.0 Hz, 1H; H4'), 3.49 (td,  $J$ =12.0, 4.5 Hz, 1H; H2'), 3.45-3.38 (m, 1H; H18'), 3.25-3.18 (m, 2H; H2 and H18), 2.93 (td,  $J$ =13.0, 5.0 Hz, 1H; H4), 2.86 (q,  $J$ =7.5 Hz, 2H; H12), 2.63-2.53 (m, 3H; H1' and H5), 1.82 (td,  $J$ =13.0, 5.5 Hz, 1H; H1), 1.55 (s, 3H; H17), 1.27 (t,  $J$ =7.5 Hz, 3H; H13), 1.04 (t,  $J$ =7.5 Hz, 3H; H19); **<sup>13</sup>C NMR** (125 MHz, [D<sub>6</sub>]DMSO, 25 °C)  $\delta$ =153.8 (C3), 139.0 (C15), 134.6 (C14), 126.6 (C11), 126.0 (C7), 119.7 (C10), 118.8 (C9), 115.5 (C8), 106.7 (C6), 56.9 (C16), 42.2 (C18), 40.4 (C2), 36.5 (C4), 33.5 (C1), 23.7 (C12), 23.12 (C17), 21.4 (C5), 14.5 (C13), 12.6 (C19); **MS**  $m/z$  (ES+) 645 ([2M+Na]<sup>+</sup>, 100%); **HRMS** (ES+) exact mass calculated for [M+Na]<sup>+</sup> (C<sub>19</sub>H<sub>25</sub>N<sub>3</sub>NaO<sup>+</sup>) requires  $m/z$  334.1890, found  $m/z$  334.1888.

## 2.2.16 Synthesis and characterisation of (*R*)-3-dodecyl-12b-methyl-1,2,3,6,7,12b-hexahydropyrimido[1',6':1,2]pyrido[3,4-*b*]indol-4(12*H*)-one **9p**

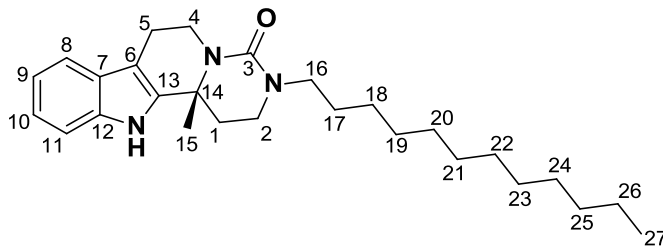

The title compound was synthesised according to general procedure **III**. Urea derivative **5k** (0.11 g, 0.30 mmol) was reacted with methyl vinyl ketone **6a** (0.12 mL, 1.5 mmol) in PhMe (60 mL) for 15 hours. The residue was purified by flash column chromatography on silica gel (solvent: CH<sub>2</sub>Cl<sub>2</sub>/MeOH 95/5) to afford product **9p** in 75% yield (95 mg) as an orange oil.

87% ee (Chiralcel AD 90:10 Hexane:Isopropanol, 1.0 mL/min, 220 nm,  $t_{r(\text{major})}$ =11.3 min;  $t_{r(\text{minor})}$ =19.1 min);  $[\alpha]_{\text{D}}^{23}$ =+80 ( $c$ =0.56, MeOH).

**IR** (neat)  $\nu$ =3231, 2923, 2852, 1602, 1502, 1453, 1352, 1297, 1275, 1173, 739; **<sup>1</sup>H NMR** (500 MHz, [D<sub>6</sub>]DMSO, 25 °C)  $\delta$ =10.91 (br. s., 1H; NH indole), 7.39 (d,  $J$ =8.0 Hz, 1H; H8), 7.31 (d,  $J$ =8.0 Hz, 1H; H11), 7.06 (td,  $J$ =8.0, 1.0 Hz, 1H; H10), 6.97 (td,  $J$ =8.0, 1.0 Hz, 1H; H9), 4.65 (dd,  $J$ =13.0, 4.5 Hz, 1H; H4'), 3.47 (td,  $J$ =13.0, 4.0 Hz, 1H; H2'), 3.41-3.36 (m, 1H; H16'), 3.24-3.19 (m, 1H; H2), 3.15-3.07 (m, 1H; H16), 2.94 (td,  $J$ =13.0, 4.5 Hz, 1H; H4), 2.65-2.60 (m, 1H; H5'), 2.58-2.54 (m, 1H; H5), 2.46-2.39 (m, 1H; H1'), 1.83 (td,  $J$ =13.0, 5.5 Hz, 1H; H1), 1.52 (s, 3H; H15), 1.49-1.42 (m, 2H; H17), 1.29-1.20 (m, 18H; H18-H26), 0.86 (t,  $J$ =7.5 Hz, 3H; H27); **<sup>13</sup>C NMR** (125 MHz, [D<sub>6</sub>]DMSO, 25 °C)  $\delta$ =154.0 (C3), 139.3 (C13), 136.0 (C12), 126.2 (C7), 120.9 (C10), 118.4 (C9), 117.9 (C8), 111.0 (C11), 106.2 (C6), 53.8 (C14), 47.5 (C16), 41.0 (C2), 36.7 (C4), 33.7 (C1), 31.3 (1C of C18-C26), 29.0 (1C of C18-C26), 29.0 (1C of C18-C26), 29.1 (1C of C18-C26), 29.0 (1C of C18-C26), 28.8 (1C of C18-C26), 28.7 (1C of C18-C26), 27.1 (C17), 26.3 (1C of C18-C26), 23.5 (C15), 22.1 (1C of C18-C26), 21.3 (C5), 13.9 (C27); **MS**  $m/z$  (ES+) 869 ([2M+Na]<sup>+</sup>, 100%); **HRMS** (ES+) exact mass calculated for [M+Na]<sup>+</sup> (C<sub>27</sub>H<sub>41</sub>N<sub>3</sub>NaO<sup>+</sup>) requires  $m/z$  446.3142, found  $m/z$  446.3139.

**2.2.17 Synthesis and characterisation of (S)-3-dodecyl-12b-phenyl-1,2,3,6,7,12b-hexahydropyrimido[1',6':1,2]pyrido[3,4-b]indol-4(12H)-one **9q****

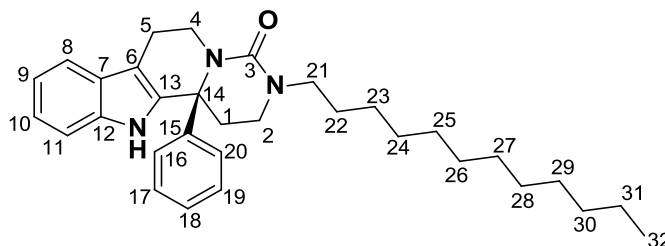

The title compound was synthesised according to general procedure **III**. Urea derivative **5k** (37 mg, 0.10 mmol) was reacted with phenyl vinyl ketone **6d** (66  $\mu$ L, 0.50 mmol) in PhMe (20 mL) for 15 hours. The residue was purified by flash column chromatography on silica gel (solvent: CH<sub>2</sub>Cl<sub>2</sub>/MeOH 95/5) to afford product **9q** in 64% yield (31 mg) as a brown powder.

71% ee (Chiralcel AD 90:10 Hexane:Isopropanol, 1.0 mL/min, 220 nm,  $t_r$  (major)=16.1 min;  $t_r$  (minor)=18.8 min);  $[\alpha]_D^{23} = -128$  ( $c=0.50$ , MeOH).

**m.p.** 187-189 °C; **IR** (neat)  $\nu=3257, 2922, 2852, 1603, 1496, 1453, 1354, 1272, 742, 701$ ; **<sup>1</sup>H NMR** (500 MHz, [D<sub>6</sub>]DMSO, 25 °C)  $\delta=11.35$  (br. s., 1H; NH indole), 7.45-7.37 (m, 6H; H8, H11, H16, H17, H19 and H20), 7.34-7.28 (m, 1H; H18), 7.11 (td,  $J=7.5, 1.0$  Hz, 1H; H10), 6.99 (td,  $J=7.5, 1.0$  Hz, 1H; H9), 4.74 (dd,  $J=13.0, 5.0$  Hz, 1H; H4'), 3.45-3.39 (m, 1H; H2'), 3.17-3.01 (m, 2H; H2 and H21'), 2.99-2.89 (m, 1H; H21), 2.82 (td,  $J=13.0, 5.0$  Hz, 1H; H4), 2.74-2.66 (m, 2H; H1' and H5'), 2.62-2.58 (m, 1H; H5), 2.30 (td,  $J=13.0, 5.0$  Hz, 1H; H1), 1.43-1.35 (m, 2H; H22), 1.25-1.07 (m, 18H; H23-H31), 0.86 (t,  $J=7.5$  Hz, 3H; H32); **<sup>13</sup>C NMR** (125 MHz, [D<sub>6</sub>]DMSO, 25 °C)  $\delta=155.0$  (C3), 143.4 (C15), 136.3 (C13 or C12), 136.2 (C12 or C13), 128.5 (C17 and C19), 127.2 (C18), 126.3 (C7), 125.7 (C16 and C20), 121.3 (C10), 118.7 (C9), 118.1 (C8), 111.2 (C11), 107.9 (C6), 61.3 (C14), 47.4 (C21), 41.1 (C2), 38.5 (C4), 35.4 (C1), 31.3 (C31 or C30), 29.1 (1C of C23-C29), 29.0 (1C of C23-C29), 28.9 (1C of C23-C29), 28.8 (1C of C23-C29), 28.7 (1C of C23-C29), 28.6 (1C of C23-C29), 27.0 (C22), 26.1 (1C of C23-C29), 22.1 (C30 or C31), 20.9 (C5), 14.0 (C32); **MS**  $m/z$  (ES+) 508 ([M+Na]<sup>+</sup>, 100%); **HRMS** (ES-) exact mass calculated for [M-H]<sup>-</sup> (C<sub>32</sub>H<sub>42</sub>N<sub>3</sub>O<sup>-</sup>) requires  $m/z$  484.3333, found  $m/z$  484.3332.

### 2.2.18 Synthesis and characterisation of (*R*)-3-(4-fluorophenyl)-12b-methyl-1,2,3,6,7,12b-hexahydropyrimido[1',6':1,2]pyrido[3,4-*b*]indol-4(12*H*)-one **9r**

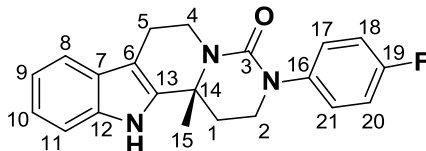

The title compound was synthesised according to general procedure **III**. Urea derivative **5l** (90 mg, 0.30 mmol) was reacted with methyl vinyl ketone **6a** (0.12 mL, 1.5 mmol) in PhMe (60 mL) for 15 hours. The residue was purified by flash column chromatography on silica gel (solvent: CH<sub>2</sub>Cl<sub>2</sub>/MeOH 95/5) to afford product **9r** in 74% yield (78 mg) as a white powder.

83% ee (Chiralcel AD 60:40 Hexane:Isopropanol, 1.0 mL/min, 240 nm,  $t_{r(\text{major})}$ =4.2 min;  $t_{r(\text{minor})}$ =11.6 min);  $[\alpha]_{\text{D}}^{23}$ =+100 ( $c$ =0.05, MeOH).

The sample has been recrystallized from MeOH to give crystals suitable for X-Ray (99% ee).

**m.p.** 190-191 °C; **IR** (neat)  $\nu$ =3401, 3273, 2932, 1622, 1509, 1454, 1214, 835, 745; **<sup>1</sup>H NMR** (500 MHz, [D<sub>6</sub>]DMSO, 25 °C)  $\delta$ =10.99 (br. s., 1H; NH indole), 7.43 (d,  $J$ =7.5 Hz, 1H; H8), 7.36-7.32 (m, 3H; H11, H17 and H21), 7.17-7.14 (m, 2H; H18, H20), 7.09 (td,  $J$ =7.5, 1.0 Hz, 1H; H10), 6.99 (td,  $J$ =7.5, 1.0 Hz, 1H; H9), 4.67 (dd,  $J$ =13.0, 5.0 Hz, 1H; H4'), 3.94 (td,  $J$ =12.0, 4.0 Hz, 1H; H2'), 3.55 (dd,  $J$ =12.0, 4.0 Hz, 1H; H2), 3.06 (td,  $J$ =13.0, 5.0 Hz, 1H; H4), 2.72-2.61 (m, 2H; H5), 2.57-2.54 (m, 1H; H1'), 2.08 (td,  $J$ =12.0, 5.5 Hz, 1H; H1), 1.68 (s, 3H; H15); **<sup>13</sup>C NMR** (125 MHz, [D<sub>6</sub>]DMSO, 25 °C)  $\delta$ =159.3 (d,  $J$ =240 Hz, C19), 153.4 (C3), 140.8 (C16), 139.1 (C13), 136.0 (C12), 128.0 (d,  $J$ =9 Hz, C17 and C21), 126.2 (C7), 121.0 (C10), 118.5 (C9), 118.0 (C8), 114.9 (d,  $J$ =23 Hz, C18 and C20), 111.1 (C11), 106.2 (C6), 54.5 (C14), 44.3 (C2), 37.0 (C4), 34.0 (C1), 24.3 (C15), 21.2 (C5); **MS**  $m/z$  (ES+) 721 ([2M+Na]<sup>+</sup>, 100%); **HRMS** (ES+) exact mass calculated for [M+Na]<sup>+</sup> (C<sub>21</sub>H<sub>20</sub>FN<sub>3</sub>NaO<sup>+</sup>) requires  $m/z$  372.1483, found  $m/z$  372.1488.

### 2.2.19 Synthesis and characterisation of (*R*)-3-(4-fluorophenyl)-12b-heptyl-1,2,3,6,7,12b-hexahydropyrimido[1',6':1,2]pyrido[3,4-*b*]indol-4(12*H*)-one **9s**

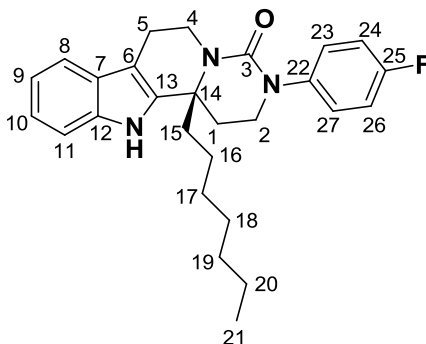

The title compound was synthesised according to general procedure **III**. Urea derivative **5l** (30 mg, 0.10 mmol) was reacted with heptyl vinyl ketone **6c** (77 mg, 0.5 mmol) in PhMe (20 mL) for

15 hours. The residue was purified by flash column chromatography on silica gel (solvent: CH<sub>2</sub>Cl<sub>2</sub>/MeOH 95/5) to afford product **9s** in 55% yield (24 mg) as a white powder.

85% ee (Chiralcel AD 80:20 Hexane:Isopropanol, 1.0 mL/min, 220 nm,  $t_{r(\text{major})}$ =5.8 min;  $t_{r(\text{minor})}$ =15.4 min);  $[\alpha]_{\text{D}}^{23}$ =+118 ( $c$ =0.31, MeOH).

**m.p.** 108-110 °C; **IR** (neat)  $\nu$ =3270, 2924, 2853, 1616, 1596, 1509, 1448, 1215, 835, 743; **<sup>1</sup>H NMR** (500 MHz, [D<sub>6</sub>]DMSO, 25 °C)  $\delta$ =10.92 (br. s., 1H; NH indole), 7.43 (d,  $J$ =7.5 Hz, 1H; H8), 7.37-7.30 (m, 3H; H11, H23 and H27), 7.19-7.13 (m, 2H; H24 and H26), 7.08 (td,  $J$ =7.5, 1.5 Hz, 1H; H10), 6.99 (td,  $J$ =7.5, 1.5 Hz, 1H; H9), 4.70 (dd,  $J$ =13.5, 4.5 Hz, 1H; H4'), 3.78 (td,  $J$ =11.5, 4.0 Hz, 1H; H2'), 3.56-3.51 (m, 1H; H2), 3.13 (td,  $J$ =13.5, 4.5 Hz, 1H; H4), 2.72-2.60 (m, 2H; H5), 2.59-2.51 (m, 1H; H1'), 2.12-2.06 (m, 2H; H1 and H15'), 2.03-1.98 (m, 1H; H15), 1.49-1.46 (m, 1H; H16'), 1.41-1.38 (m, 1H; H16), 1.27-1.18 (m, 8H; H17-H20), 0.84 (t,  $J$ =7.0 Hz, 3H; H21); **<sup>13</sup>C NMR** (125 MHz, [D<sub>6</sub>]DMSO, 25 °C)  $\delta$ =159.3 (d,  $J$ =240 Hz, C25), 153.9 (C3), 140.8 (C22), 137.7 (C13), 136.1 (C12), 127.8 (d,  $J$ =10 Hz, C23 and C27), 126.2 (C7), 121.0 (C10), 118.5 (C9), 117.9 (C8), 114.9 (d,  $J$ =21 Hz, C24 and C26), 111.1 (C11), 107.1 (C6), 57.3 (C14), 44.4 (C2), 38.4 (C15), 37.8 (C4), 32.9 (C1), 31.2 (1C of C17-C20), 29.5 (1C of C17-C20), 28.6 (1C of C17-C20), 24.5 (C16), 22.0 (1C of C17-C20), 20.9 (C5), 13.9 (C21); **MS**  $m/z$  (ES+) 434 ([M+H]<sup>+</sup>, 100%); **HRMS** (ES+) exact mass calculated for [M+Na]<sup>+</sup> (C<sub>27</sub>H<sub>32</sub>FN<sub>3</sub>NaO<sup>+</sup>) requires  $m/z$  456.2422, found  $m/z$  456.2416.

### 2.2.20 Synthesis and characterisation of (*R*)-3-(4-fluorophenyl)-11-methyl-12b-ethyl-1,2,3,6,7,12b-hexahydropyrimido[1',6':1,2]pyrido[3,4-*b*]indol-4(12*H*)-one **9t**

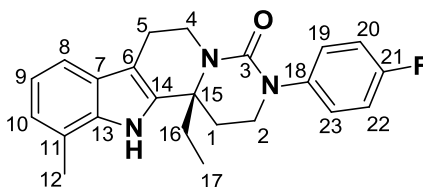

The title compound was synthesised according to general procedure **III**. Urea derivative **5m** (93 mg, 0.30 mmol) was reacted with ethyl vinyl ketone **6b** (0.15 mL, 1.5 mmol) in PhMe (60 mL) for 15 hours. The residue was purified by flash column chromatography on silica gel (solvent: CH<sub>2</sub>Cl<sub>2</sub>/MeOH 95/5) to afford product **9t** in 75% yield (85 mg) as a white powder.

94% ee (Chiralcel AD 80:20 Hexane:Isopropanol, 1.0 mL/min, 220 nm,  $t_{r(\text{major})}$ =7.0 min;  $t_{r(\text{minor})}$ =12.1 min);  $[\alpha]_{\text{D}}^{23}$ =+122 ( $c$ =0.10, MeOH).

**m.p.** 191-193 °C; **IR** (neat)  $\nu$ =3284, 3192, 2930, 1610, 1508, 1444, 1213, 832, 778, 746; **<sup>1</sup>H NMR** (500 MHz, [D<sub>6</sub>]DMSO, 25 °C)  $\delta$ =10.55 (br. s., 1H; NH indole), 7.35-7.30 (m, 2H; H19 and H23), 7.25 (d,  $J$ =7.5 Hz, 1H; H8), 7.18-7.13 (m, 2H; H20 and H22), 6.93-6.87 (m, 2H; H9 and H10), 4.70 (dd,  $J$ =13.0, 4.5 Hz, 1H; H4'), 3.77 (td,  $J$ =11.0, 4.5 Hz, 1H; H2'), 3.56-3.51 (m, 1H; H2), 3.14 (td,  $J$ =13.0, 4.5 Hz, 1H; H4), 2.69-2.61 (m, 3H; H1' and H5), 2.48 (s, 3H; H12), 2.18-2.10 (m, 3H; H1 and H16), 0.96 (t,  $J$ =7.5 Hz, 3H; H17); **<sup>13</sup>C NMR** (125 MHz, [D<sub>6</sub>]DMSO,

25 °C)  $\delta$ =159.2 (d,  $J$ =239 Hz, C21), 154.2 (C3), 140.8 (C18), 137.4 (C14), 135.5 (C13), 127.8 (d,  $J$ =9 Hz, C19 and C23), 126.0 (C7), 121.8 (C10), 120.3 (C11), 118.7 (C9), 115.4 (C8), 114.9 (d,  $J$ =21 Hz, C20 and C22), 107.8 (C6), 57.8 (C15), 44.5 (C2), 38.0 (C4), 32.6 (C1), 31.2 (C16), 20.9 (C5), 17.1 (C12); 9.5 (C17); **MS**  $m/z$  (ES+) 777 ( $[2M+Na]^+$ , 100%); **HRMS** (ES+) exact mass calculated for  $[M+Na]^+$  ( $C_{23}H_{24}FN_3NaO^+$ ) requires  $m/z$  400.1796, found  $m/z$  400.1798.

### 2.2.21 Synthesis and characterisation of (*R*)-3-(4-methoxyphenyl)-12b-methyl-1,2,3,6,7,12b-hexahydropyrimido[1',6':1,2]pyrido[3,4-*b*]indol-4(12*H*)-one **9u**

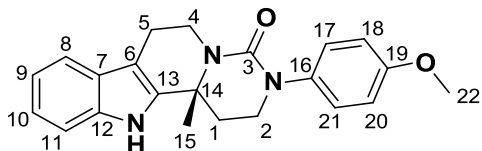

The title compound was synthesised according to general procedure **III**. Urea derivative **5n** (93 mg, 0.30 mmol) was reacted with methyl vinyl ketone **6a** (0.12 mL, 1.5 mmol) in PhMe (60 mL) for 15 hours. The residue was purified by flash column chromatography on silica gel (solvent:  $CH_2Cl_2/MeOH$  95/5) to afford product **9u** in 76% yield (82 mg) as a white powder.

81% ee (Chiralcel AD 60:40 Hexane:Isopropanol, 1.0 mL/min, 220 nm,  $t_r$  (major)=5.4 min;  $t_r$  (minor)=20.1 min);  $[\alpha]_D^{23}$ =+94( $c$ =0.13, MeOH).

**m.p.** 122-124 °C; **IR** (neat)  $\nu$ =3345, 3295, 2963, 2918, 1633, 1594, 1513, 1491, 751;  **$^1H$  NMR** (500 MHz,  $[D_6]DMSO$ , 25 °C)  $\delta$ =10.98 (br. s., 1H; NH indole), 7.43 (d,  $J$ =7.5 Hz, 1H; H8), 7.34 (d,  $J$ =7.5 Hz, 1H; H11), 7.21 (d,  $J$ =9.0 Hz, 2H; H17 and H21), 7.08 (td,  $J$ =7.5, 1.0 Hz, 1H; H10), 6.99 (td,  $J$ =7.5, 1.0 Hz, 1H; H9), 6.89 (d,  $J$ =9.0 Hz, 2H; H18 and H20), 4.67 (dd,  $J$ =13.0, 5.0 Hz, 1H; H4'), 3.89 (td,  $J$ =12.0, 4.0 Hz, 1H; H2'), 3.71 (s, 3H; H22), 3.54-3.48 (m, 1H; H2), 3.04 (td,  $J$ =13.0, 5.0 Hz, 1H; H4), 2.68-2.62 (m, 2H; H5), 2.56-2.53 (m, 1H; H1'), 2.06 (td,  $J$ =13.0, 5.0 Hz, 1H; H1), 1.67 (s, 3H; H15);  **$^{13}C$  NMR** (125 MHz,  $[D_6]DMSO$ , 25 °C)  $\delta$ =156.62 (C19), 153.60 (C3), 139.20 (C16), 137.56 (C13), 136.00 (C12), 127.48 (C17 and C21), 126.22 (C7), 120.97 (C10), 118.52 (C9), 117.95 (C8), 113.59 (C18 and C20), 111.07 (C11), 106.23 (C6), 55.21 (C22), 54.37 (C14), 44.66 (C2), 36.93 (C4), 34.11 (C1), 24.15 (C15), 21.21 (C5); **MS**  $m/z$  (ES+) 745 ( $[2M+Na]^+$ , 100%); **HRMS** (ES+) exact mass calculated for  $[M+H]^+$  ( $C_{22}H_{24}N_3O_2^+$ ) requires  $m/z$  362.1863, found  $m/z$  362.1860.

**2.2.22 Synthesis and characterisation of (*R*)-3-(4-methoxyphenyl)-9-fluoro-12b-heptyl-1,2,3,6,7,12b-hexahydropyrimido[1',6':1,2]pyrido[3,4-*b*]indol-4(12*H*)-one **9v****

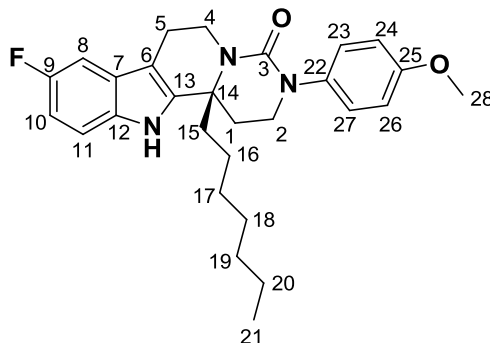

The title compound was synthesised according to general procedure **III**. Urea derivative **5o** (33 mg, 0.10 mmol) was reacted with heptyl vinyl ketone **6c** (77 mg, 0.50 mmol) in PhMe (20 mL) for 15 hours. The residue was purified by flash column chromatography on silica gel (solvent: CH<sub>2</sub>Cl<sub>2</sub>/MeOH 95/5) to afford product **9v** in 60% yield (28 mg) as a yellow oil.

89% ee (Chiralcel AD 60:40 Hexane:Isopropanol, 1.0 mL/min, 240 nm,  $t_r$  (major)=5.0 min;  $t_r$  (minor)=8.6 min);  $[\alpha]_D^{23}$  = +101 ( $c$ =0.21, MeOH).

**IR** (neat)  $\nu$ =3247, 2928, 2856, 1602, 1512, 1445, 1170, 1034, 831, 797, 747; **<sup>1</sup>H NMR** (500 MHz, [D<sub>6</sub>]DMSO, 25 °C)  $\delta$ =11.02 (br. s., 1H; NH indole), 7.33 (dd,  $J$ =9.0, 4.0 Hz, 1H; H10), 7.22-7.15 (m, 3H; H8, H23 and H27), 6.94-6.86 (m, 3H; H11, H24 and H26), 4.68 (dd,  $J$ =13.0, 5.0 Hz, 1H; H4'), 3.75 (s, 3H; H28), 3.73-3.69 (m, 1H; H2'), 3.54-3.44 (m, 1H; H2), 3.10 (td,  $J$ =13.0, 5.0 Hz, 1H; H4), 2.73-2.57 (m, 3H; H1' and H5), 2.15-2.02 (m, 2H; H1 and H15'), 2.01-1.96 (m, 1H; H15), 1.42-1.39 (m, 1H; H16'), 1.30-1.20 (m, 9H; H16-H20), 0.84 (t,  $J$ =7.5 Hz, 3H; H21); **<sup>13</sup>C NMR** (125 MHz, [D<sub>6</sub>]DMSO, 25 °C)  $\delta$ =156.8 (d,  $J$ =229 Hz, C9), 156.6 (C25), 154.1 (C3), 139.9 (C13), 137.5 (C22), 132.7 (C12), 127.3 (C23 and C27), 126.4 (d,  $J$ =10 Hz, C7), 113.6 (C24 and C26), 112.0 (d,  $J$ =10 Hz, C10), 108.8 (d,  $J$ =24 Hz, C11), 107.5 (C6), 102.8 (d,  $J$ =24 Hz, C8), 57.2 (C14), 55.2 (C28), 44.7 (C2), 38.3 (C15), 37.7 (C4), 32.9 (C1), 31.2 (1C of C17-C20), 29.5 (1C of C17-C20), 28.6 (1C of C17-C20), 24.5 (C16), 22.1 (1C of C17-C20), 20.9 (C5), 13.9 (C21); **MS**  $m/z$  (ES+) 464 ([M+H]<sup>+</sup>, 100%); **HRMS** (ES+) exact mass calculated for [M+H]<sup>+</sup> (C<sub>28</sub>H<sub>35</sub>FN<sub>3</sub>O<sub>2</sub><sup>+</sup>) requires  $m/z$  464.2708, found  $m/z$  464.2714.

### 2.2.23 Synthesis and characterisation of (*R*)-3-(4-methoxyphenyl)-11-ethyl-12b-methyl-1,2,3,6,7,12b-hexahydropyrimido[1',6':1,2]pyrido[3,4-*b*]indol-4(12*H*)-one **9w**

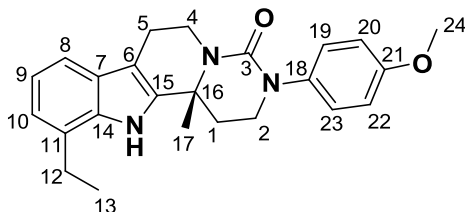

The title compound was synthesised according to general procedure **III**. Urea derivative **5p** (68 mg, 0.20 mmol) was reacted with methyl vinyl ketone **6a** (81  $\mu$ L, 1.0 mmol) in PhMe (40 mL) for 15 hours. The residue was purified by flash column chromatography on silica gel (solvent: CH<sub>2</sub>Cl<sub>2</sub>/MeOH 95/5) to afford product **9w** in 74% yield (58 mg) as a brown powder.

96% ee (Chiralcel AD 60:40 Hexane:Isopropanol, 1.0 mL/min, 220 nm,  $t_{r(\text{major})}$ =4.3 min;  $t_{r(\text{minor})}$ =7.0 min);  $[\alpha]_{\text{D}}^{23}$ =+106 ( $c$ =0.16, MeOH).

**m.p.** 121-123 °C; **IR** (neat)  $\nu$ =3401, 3280, 2964, 2933, 1602, 1512, 1458, 1246, 1173, 1033, 830, 747; **<sup>1</sup>H NMR** (500 MHz, [D<sub>6</sub>]DMSO, 25 °C)  $\delta$ =10.63 (br. s., 1H; NH indole), 7.26-7.19 (m, 3H; H8, H19 and H23), 6.96-6.86 (m, 4H; H9, H10, H20 and H22), 4.65 (dd,  $J$ =13.0, 5.5 Hz, 1H; H4'), 3.89 (td,  $J$ =12.0, 4.0 Hz, 1H; H2'), 3.55-3.50 (m, 1H; H2), 3.75 (s, 3H; H24), 3.03 (td,  $J$ =13.0, 5.5 Hz, 1H; H4), 2.87 (q,  $J$ =7.5 Hz, 2H; H12), 2.66-2.61 (m, 2H; H5), 2.73-2.67 (m, 1H; H1'), 1.28 (t,  $J$ =7.5 Hz, 3H; H13), 2.04 (td,  $J$ =13.0, 5.0 Hz, 1H; H1), 1.70 (s, 3H; H17); **<sup>13</sup>C NMR** (125 MHz, [D<sub>6</sub>]DMSO, 25 °C)  $\delta$ =156.6 (C21), 153.6 (C3), 138.9 (C15), 137.6 (C18), 134.7 (C14), 127.5 (C19 and C23), 126.6 (C11), 126.0 (C7), 119.8 (C10), 118.9 (C9), 115.5 (C8), 113.6 (C20 and C22), 106.7 (C6), 55.2 (C24), 54.5 (C16), 44.7 (C2), 36.9 (C4), 34.0 (C1), 23.9 (C17 or C12), 23.7 (C12 or C17), 21.3 (C5), 14.5 (C13); **MS**  $m/z$  (ES+) 390 ([M+H]<sup>+</sup>, 100%); **HRMS** (ES+) exact mass calculated for [M+H]<sup>+</sup> (C<sub>24</sub>H<sub>28</sub>N<sub>3</sub>O<sub>2</sub><sup>+</sup>) requires  $m/z$  390.2176, found  $m/z$  390.2176.



### 3.1.1 $^1\text{H}$ NMR of compound 5a

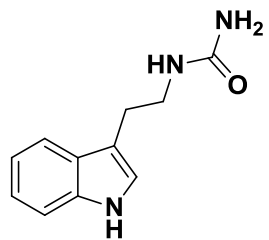

500 MHz,  $[\text{D}_6]\text{DMSO}$

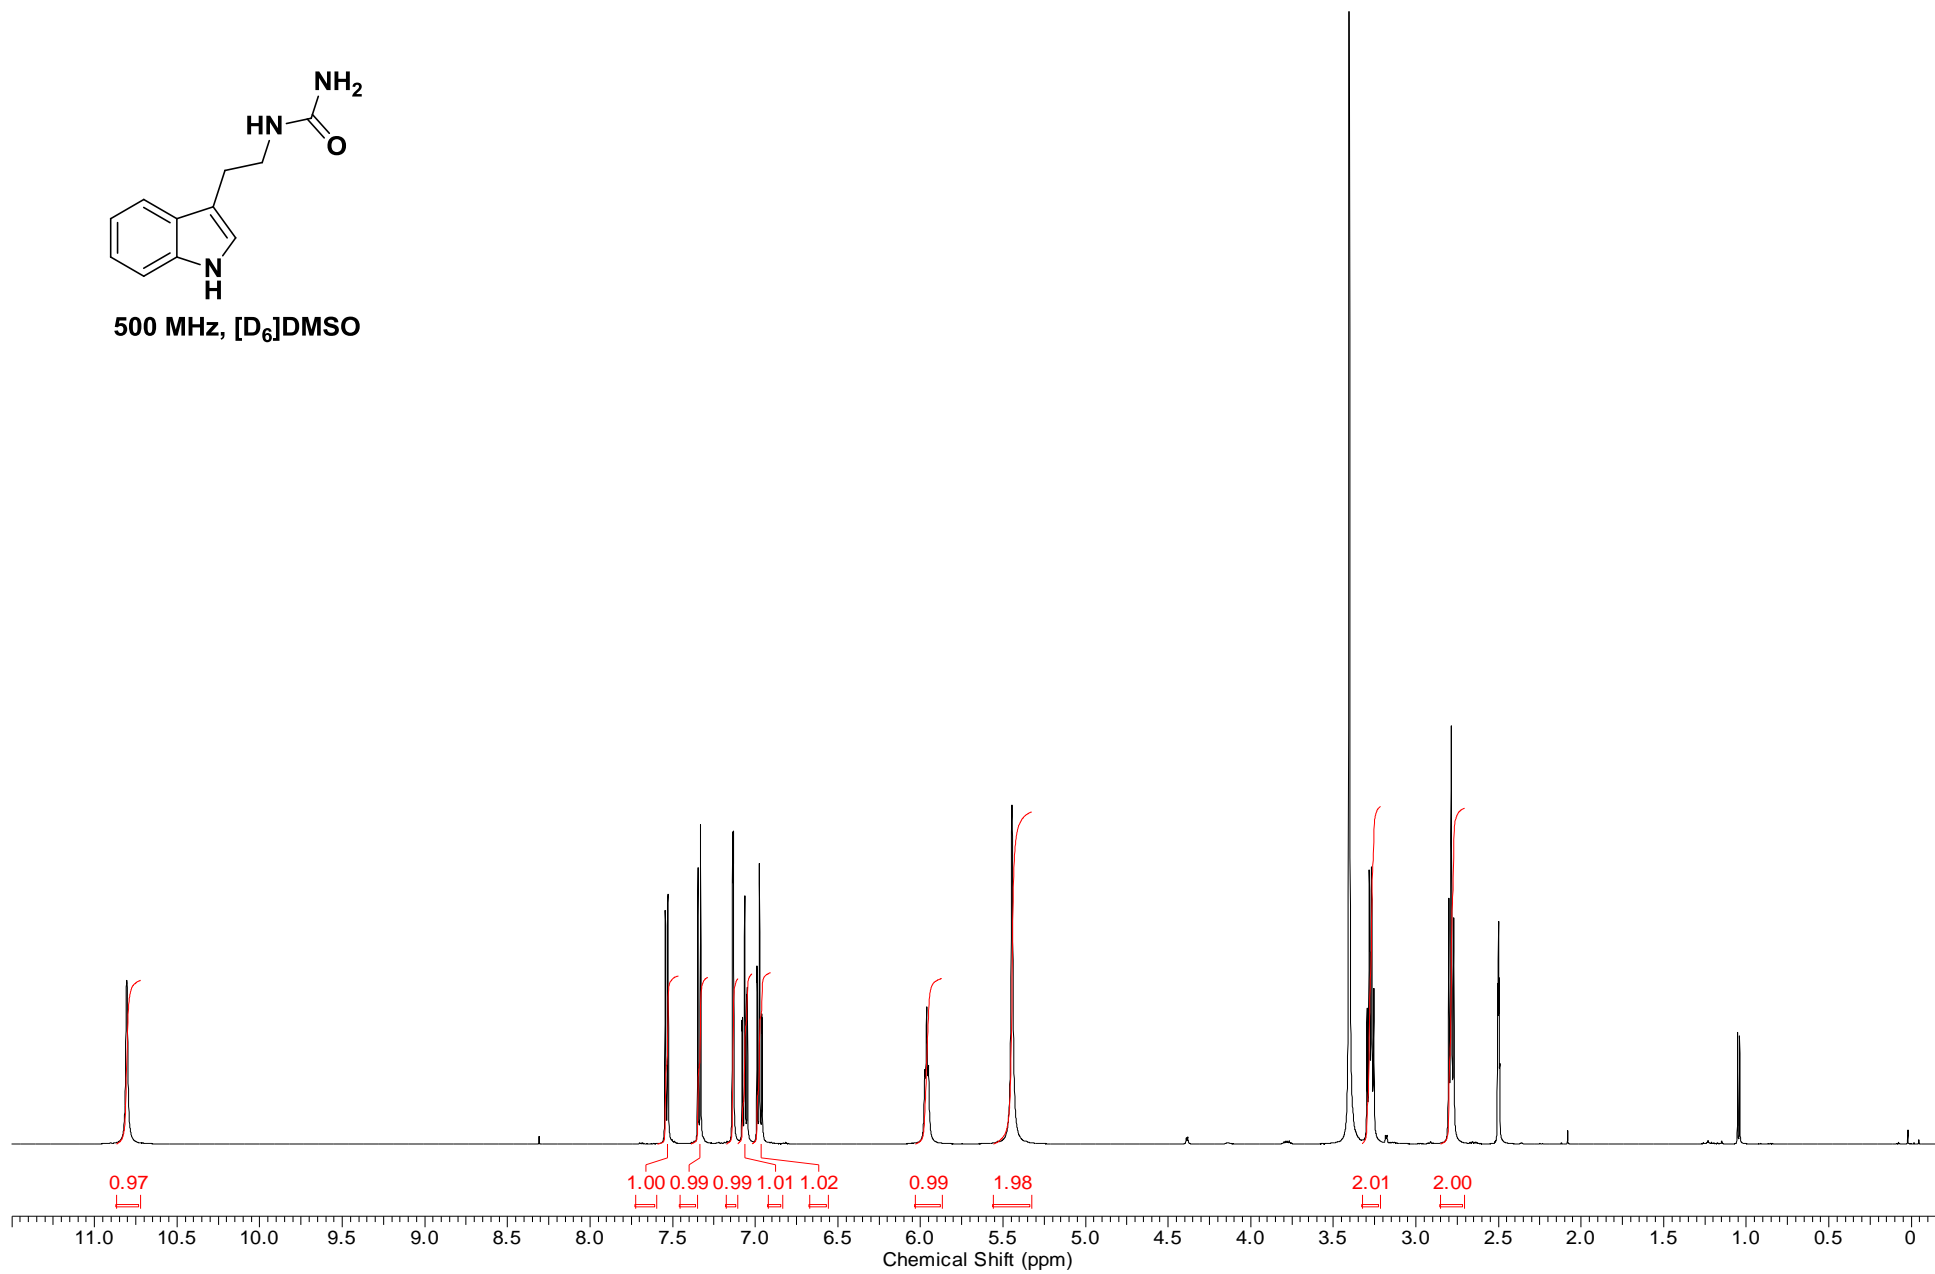

### 3.1.2 $^{13}\text{C}$ NMR of compound 5a

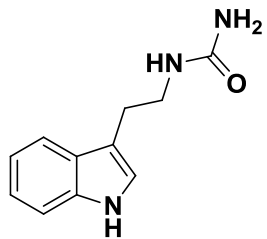

125 MHz,  $[\text{D}_6]\text{DMSO}$

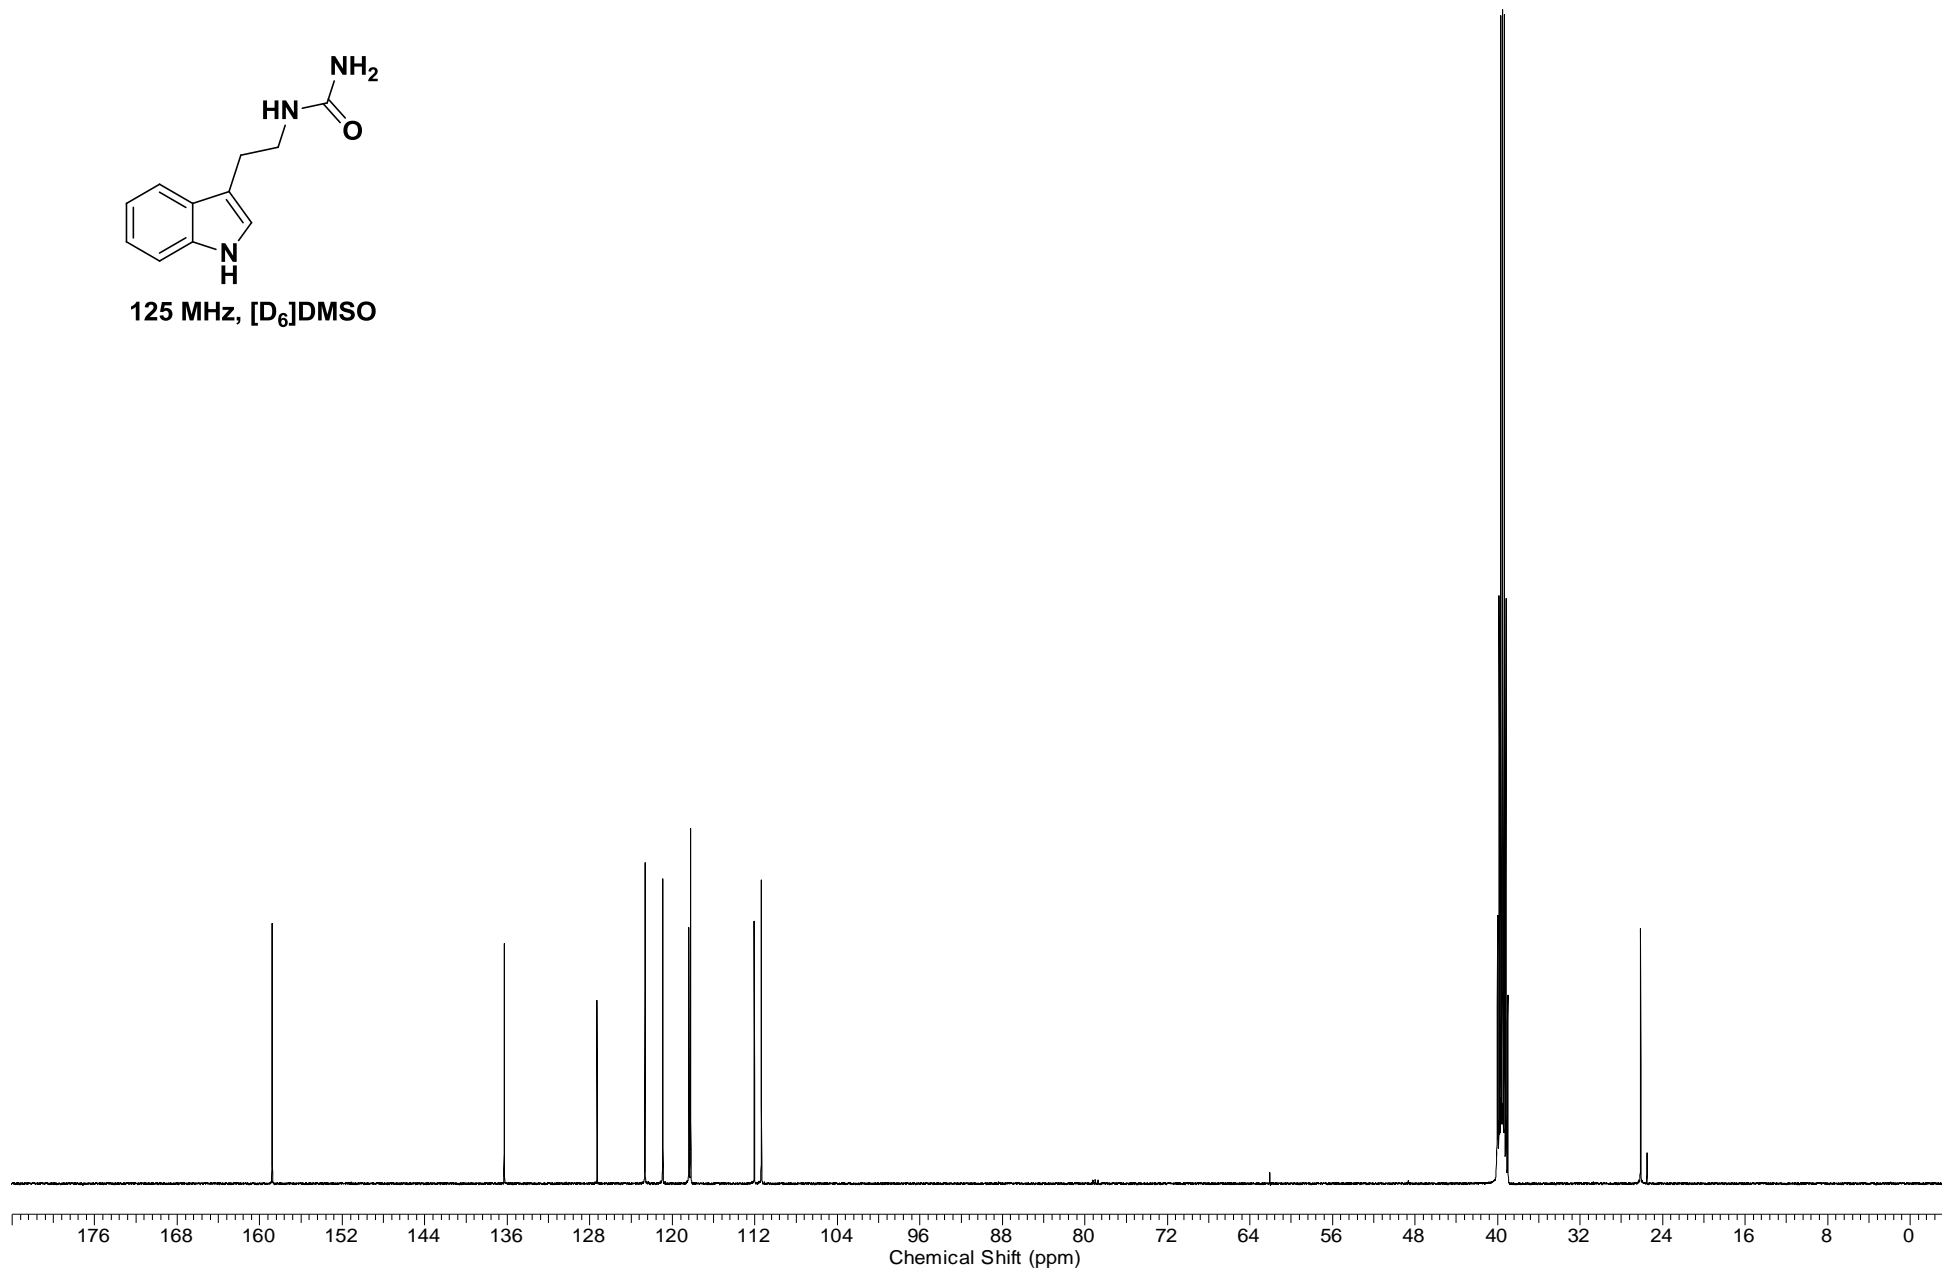

### 3.2.1 $^1\text{H}$ NMR of compound 5b

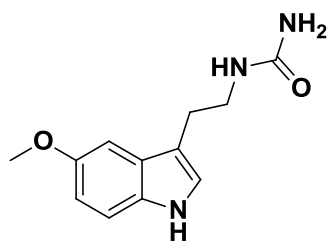

500 MHz,  $[\text{D}_6]\text{DMSO}$

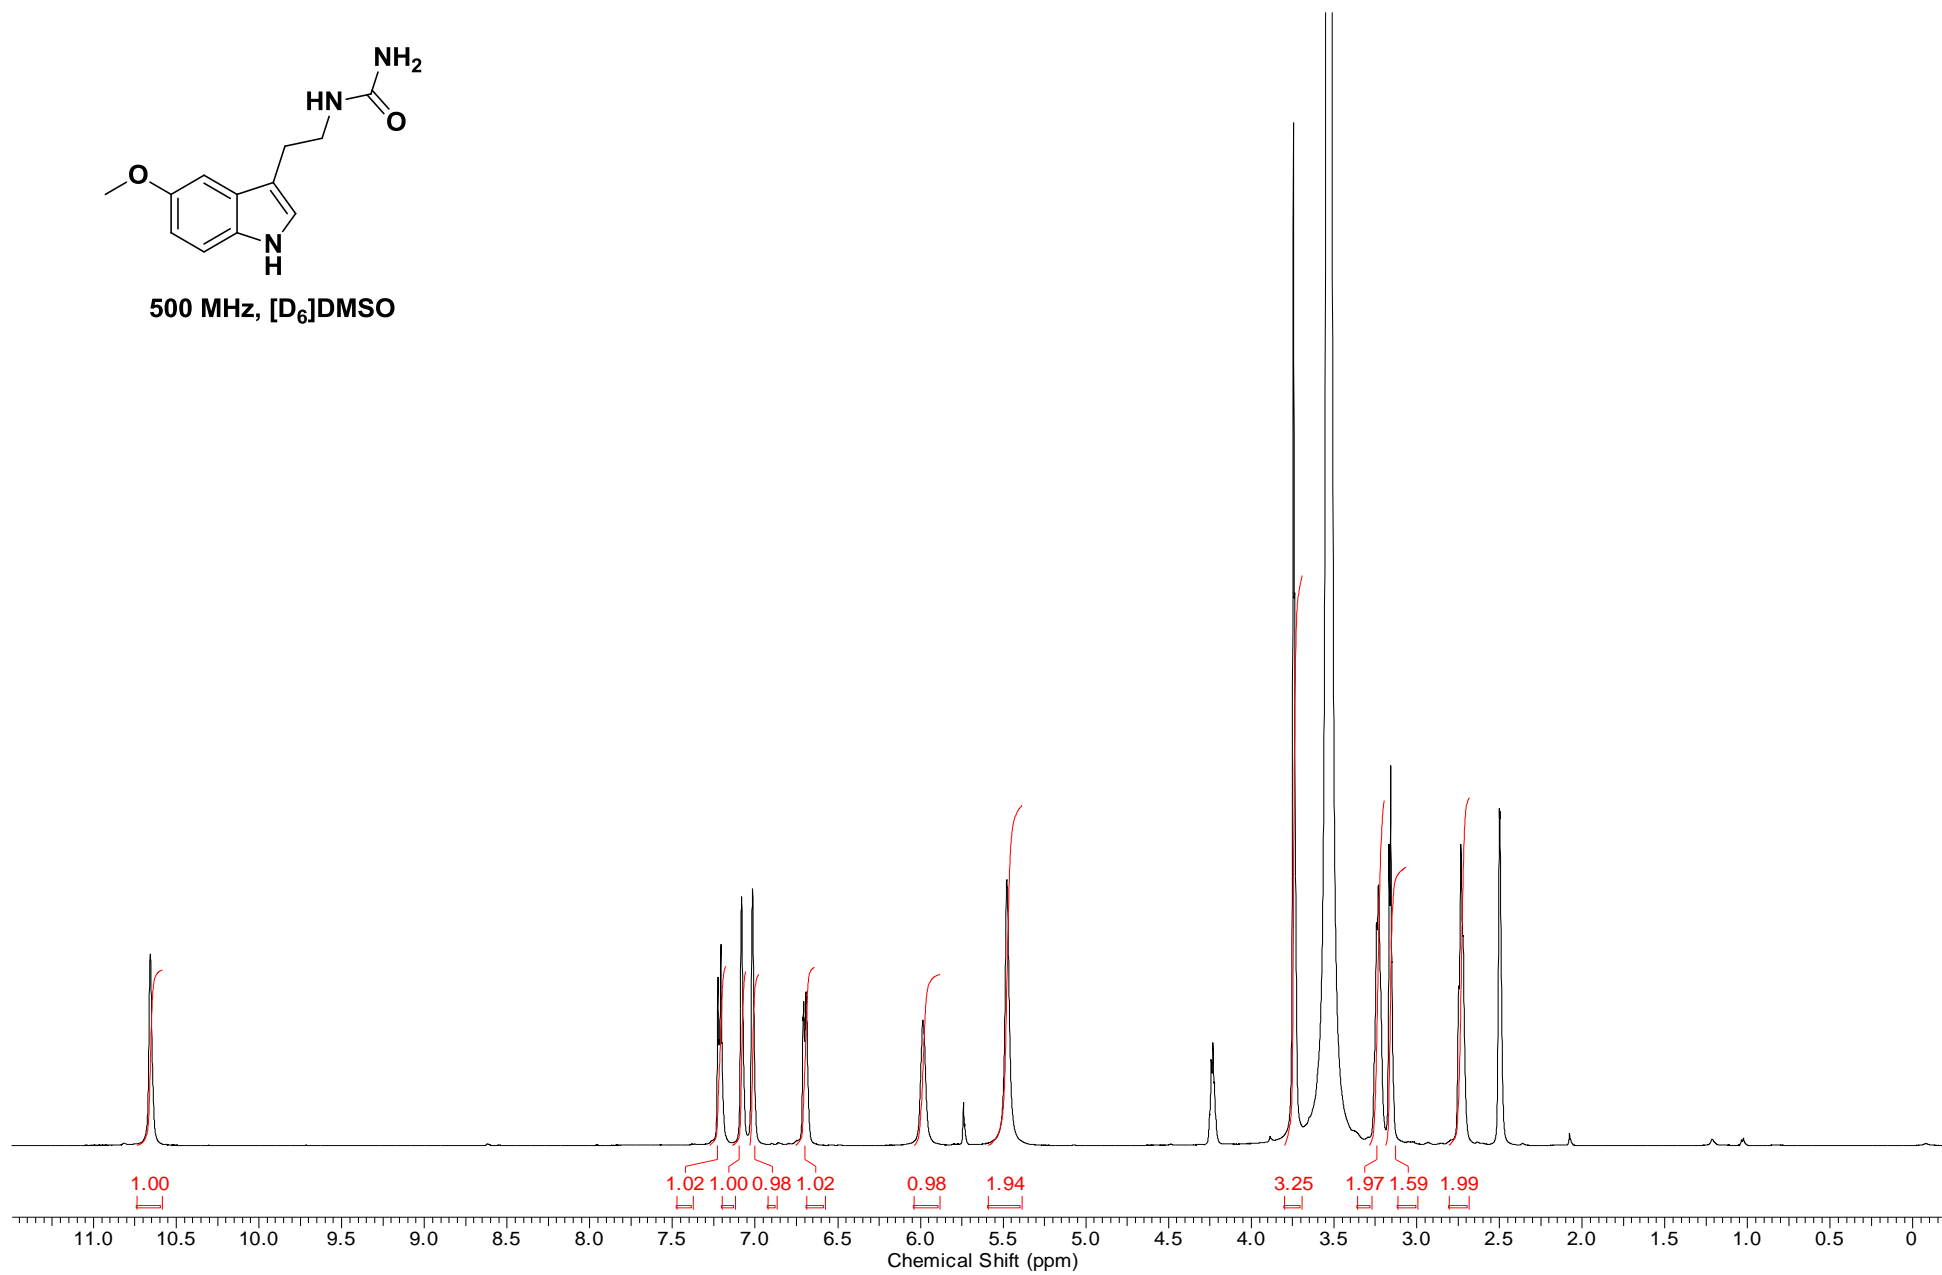

### 3.2.2 $^{13}\text{C}$ NMR of compound 5b

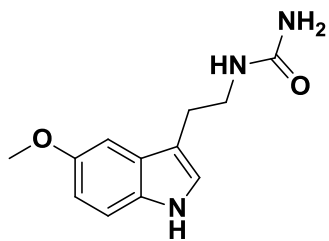

125 MHz,  $[\text{D}_6]\text{DMSO}$

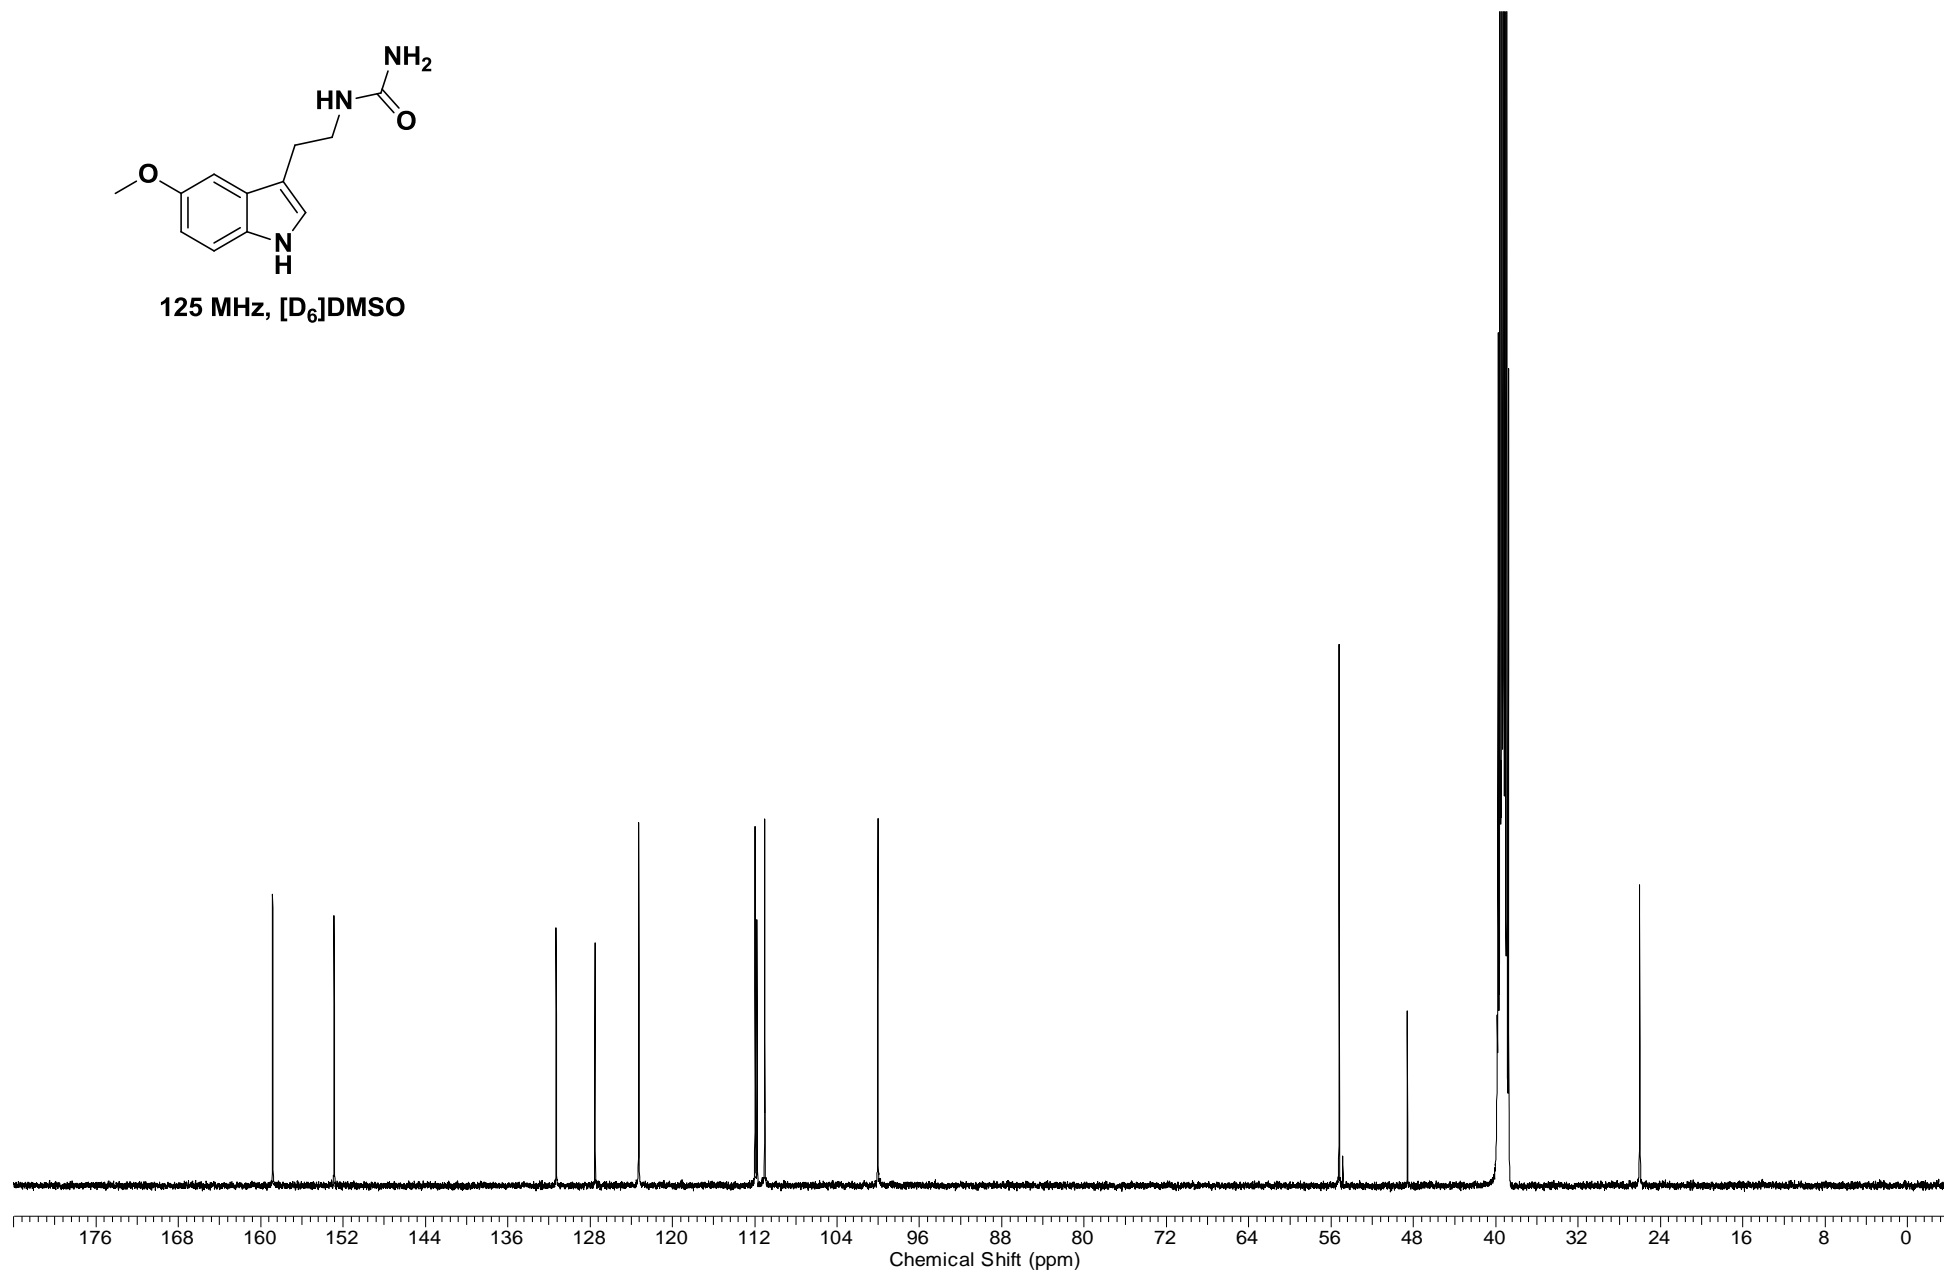

### 3.3.1 $^1\text{H}$ NMR of compound 5c

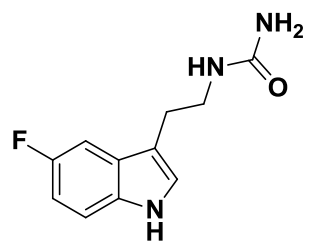

500 MHz,  $[\text{D}_6]\text{DMSO}$

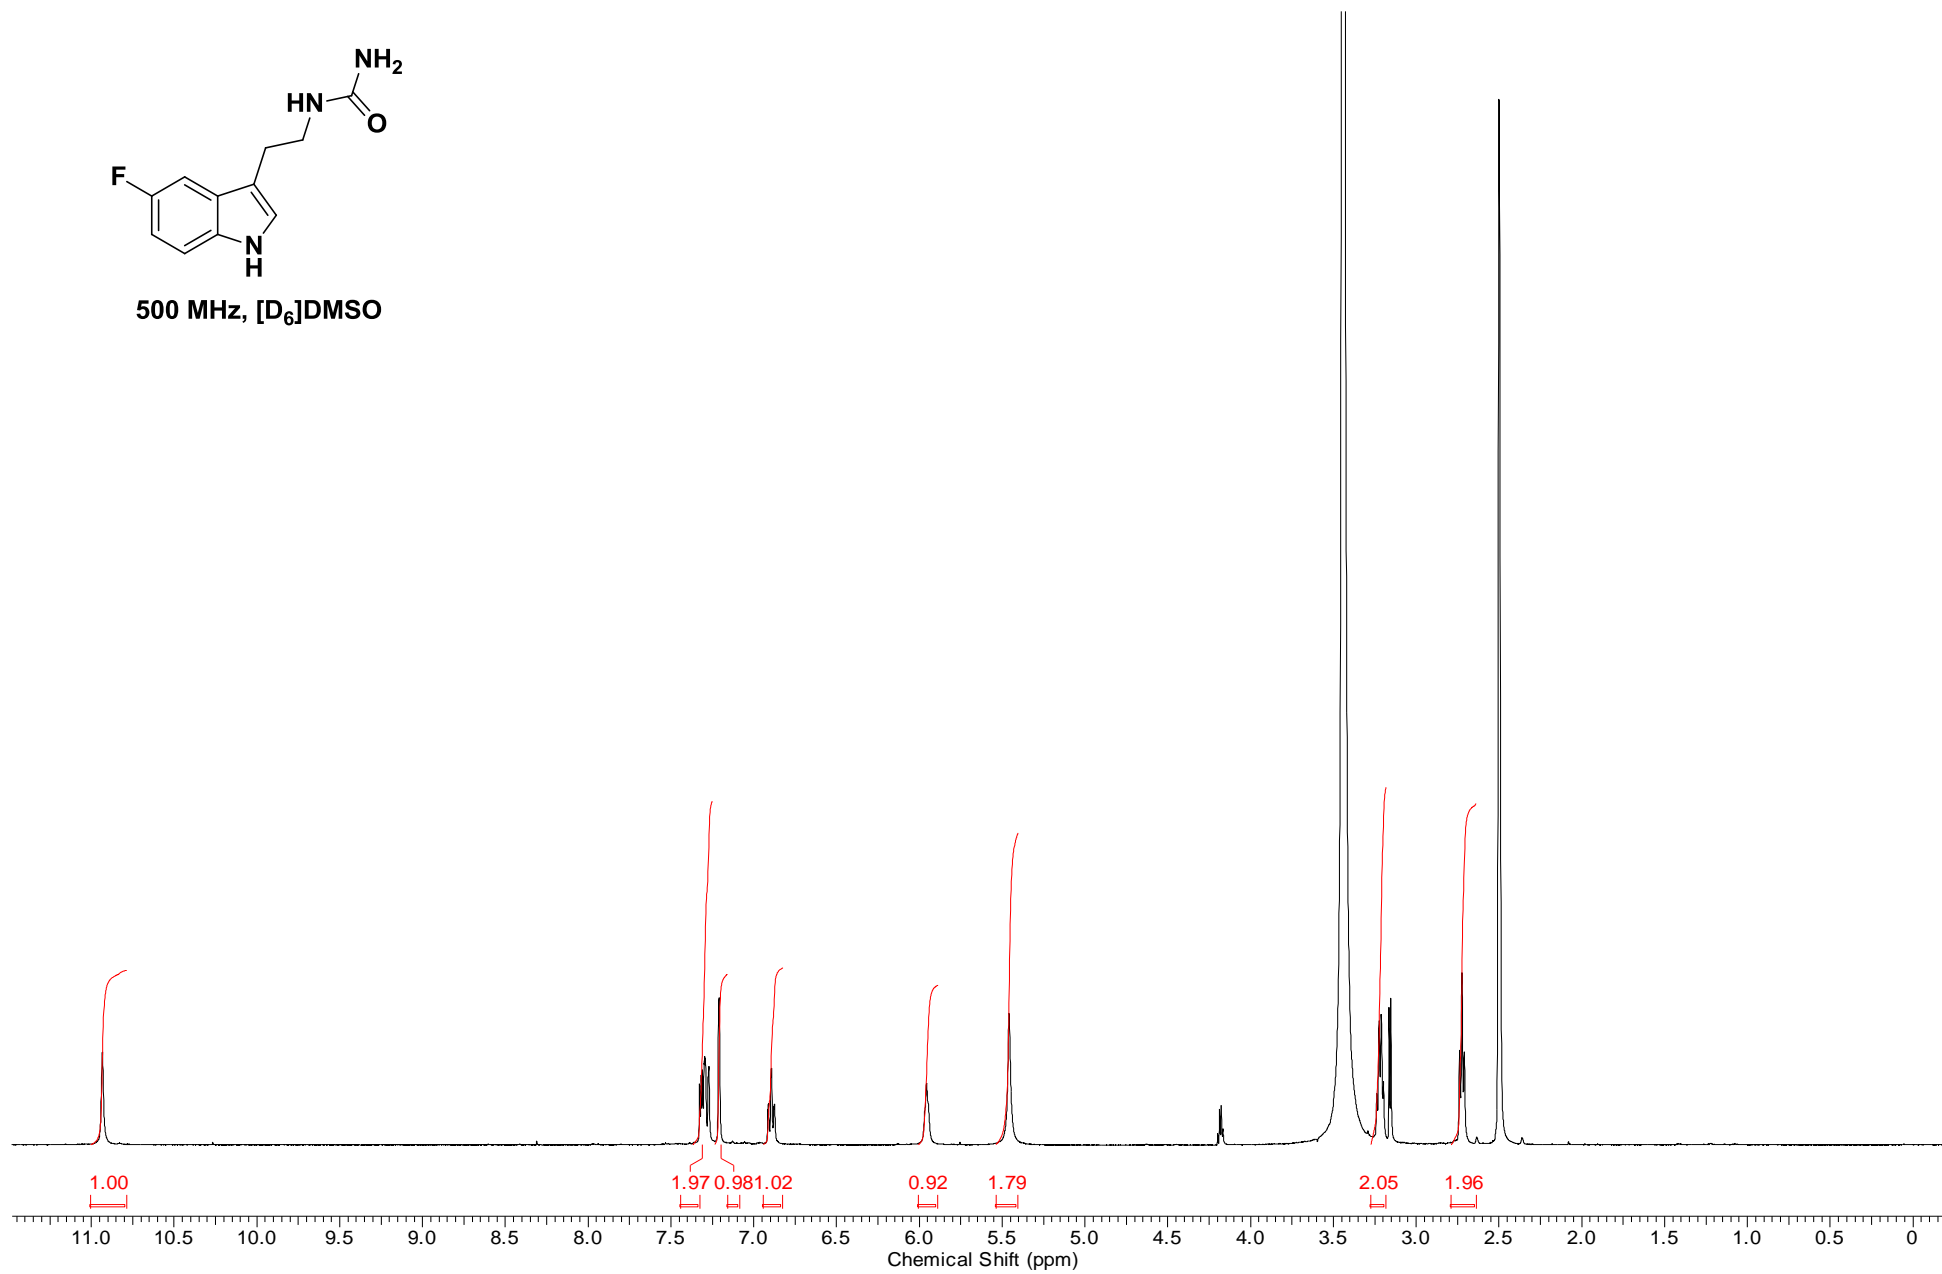

### 3.3.2 $^{13}\text{C}$ NMR of compound 5c

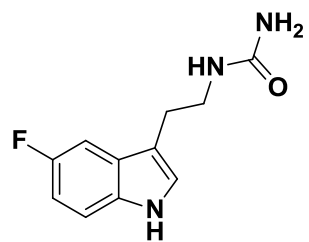

125 MHz,  $[\text{D}_6]\text{DMSO}$

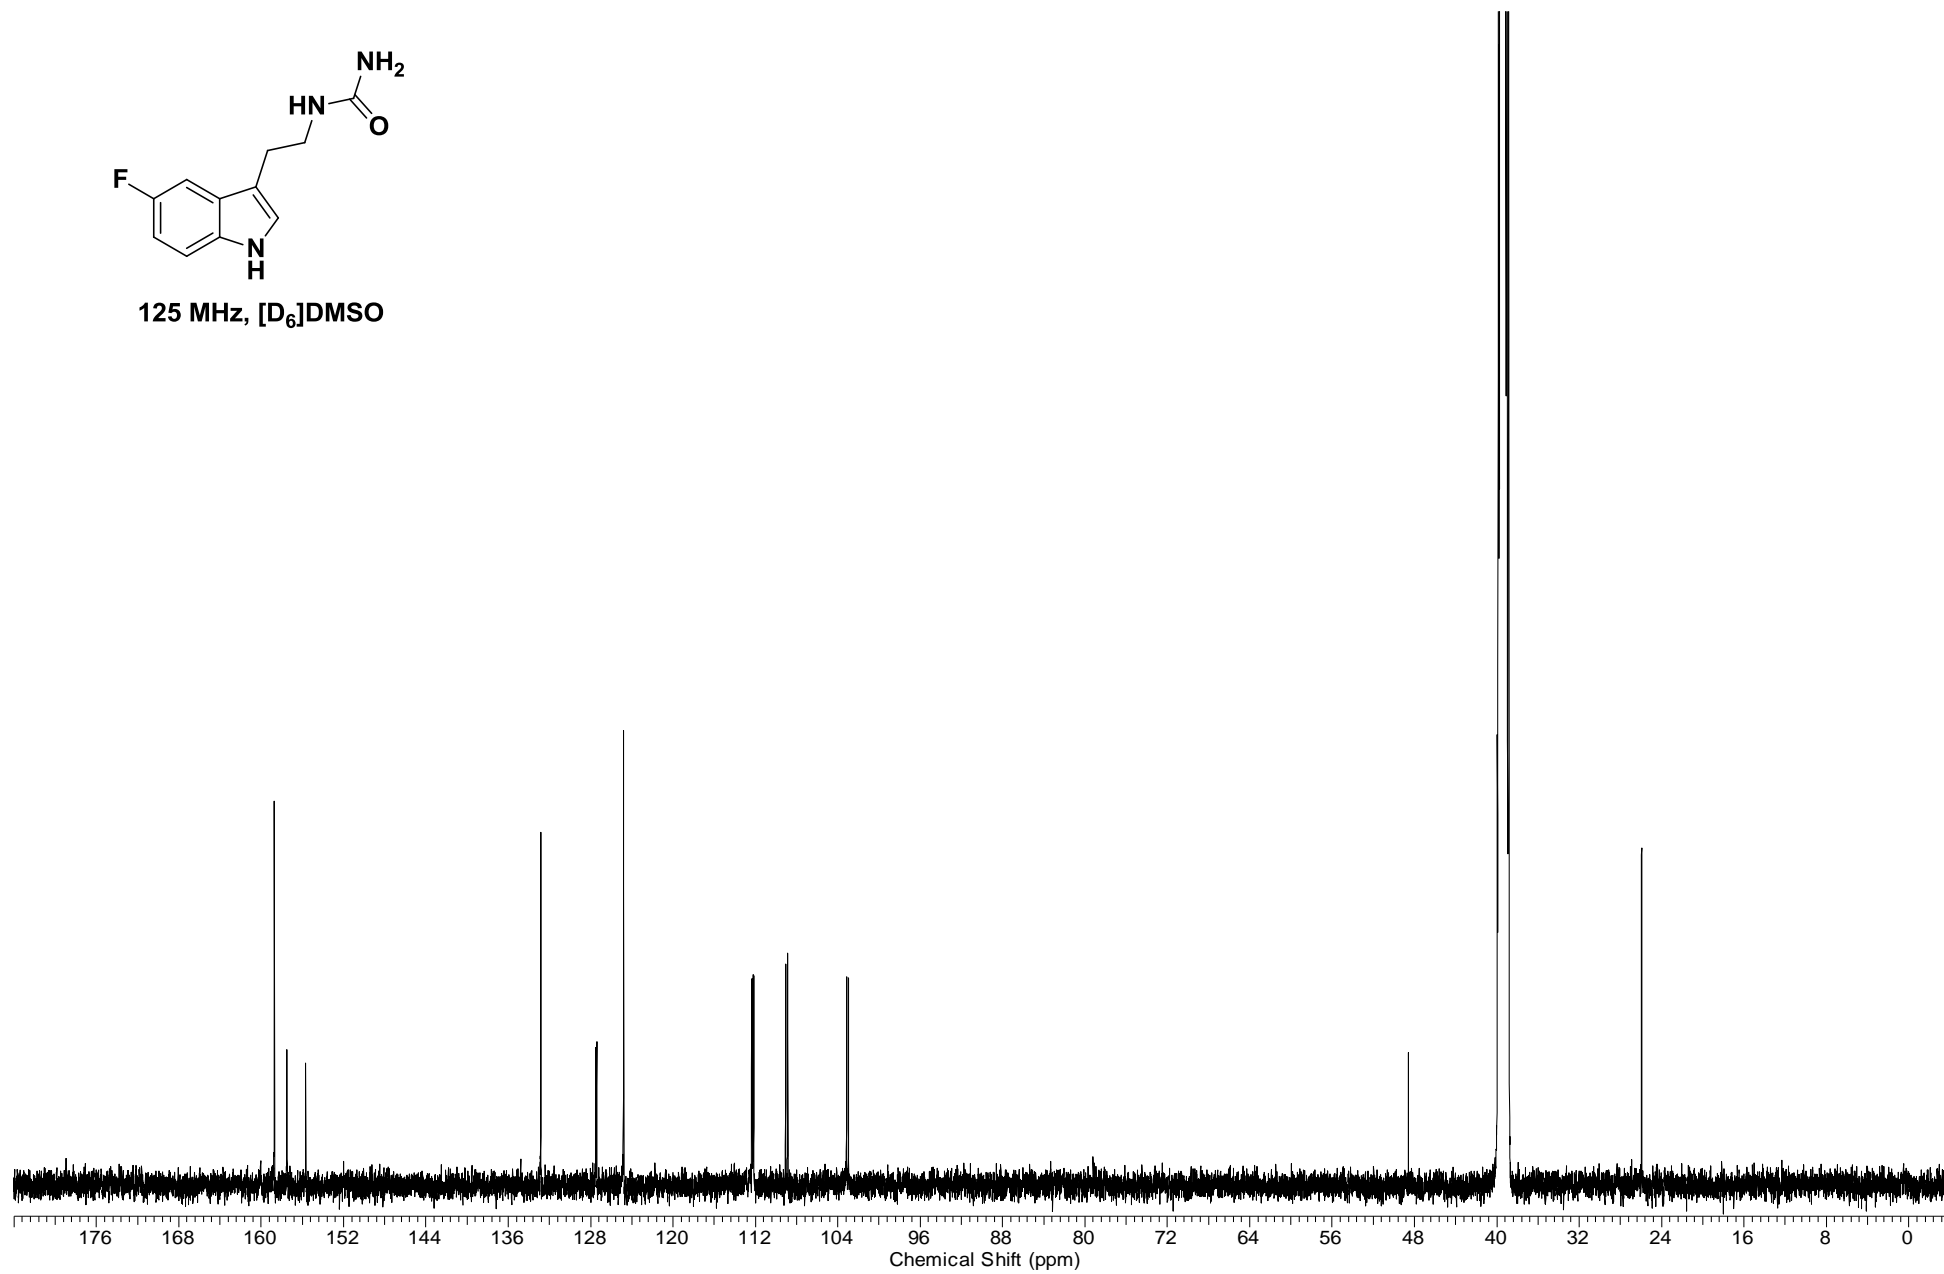

### 3.4.1 $^1\text{H}$ NMR of compound 5d

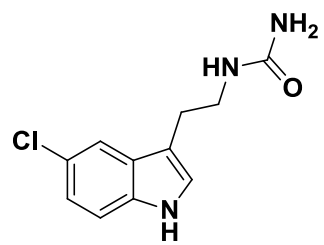

500 MHz,  $[\text{D}_6]\text{DMSO}$

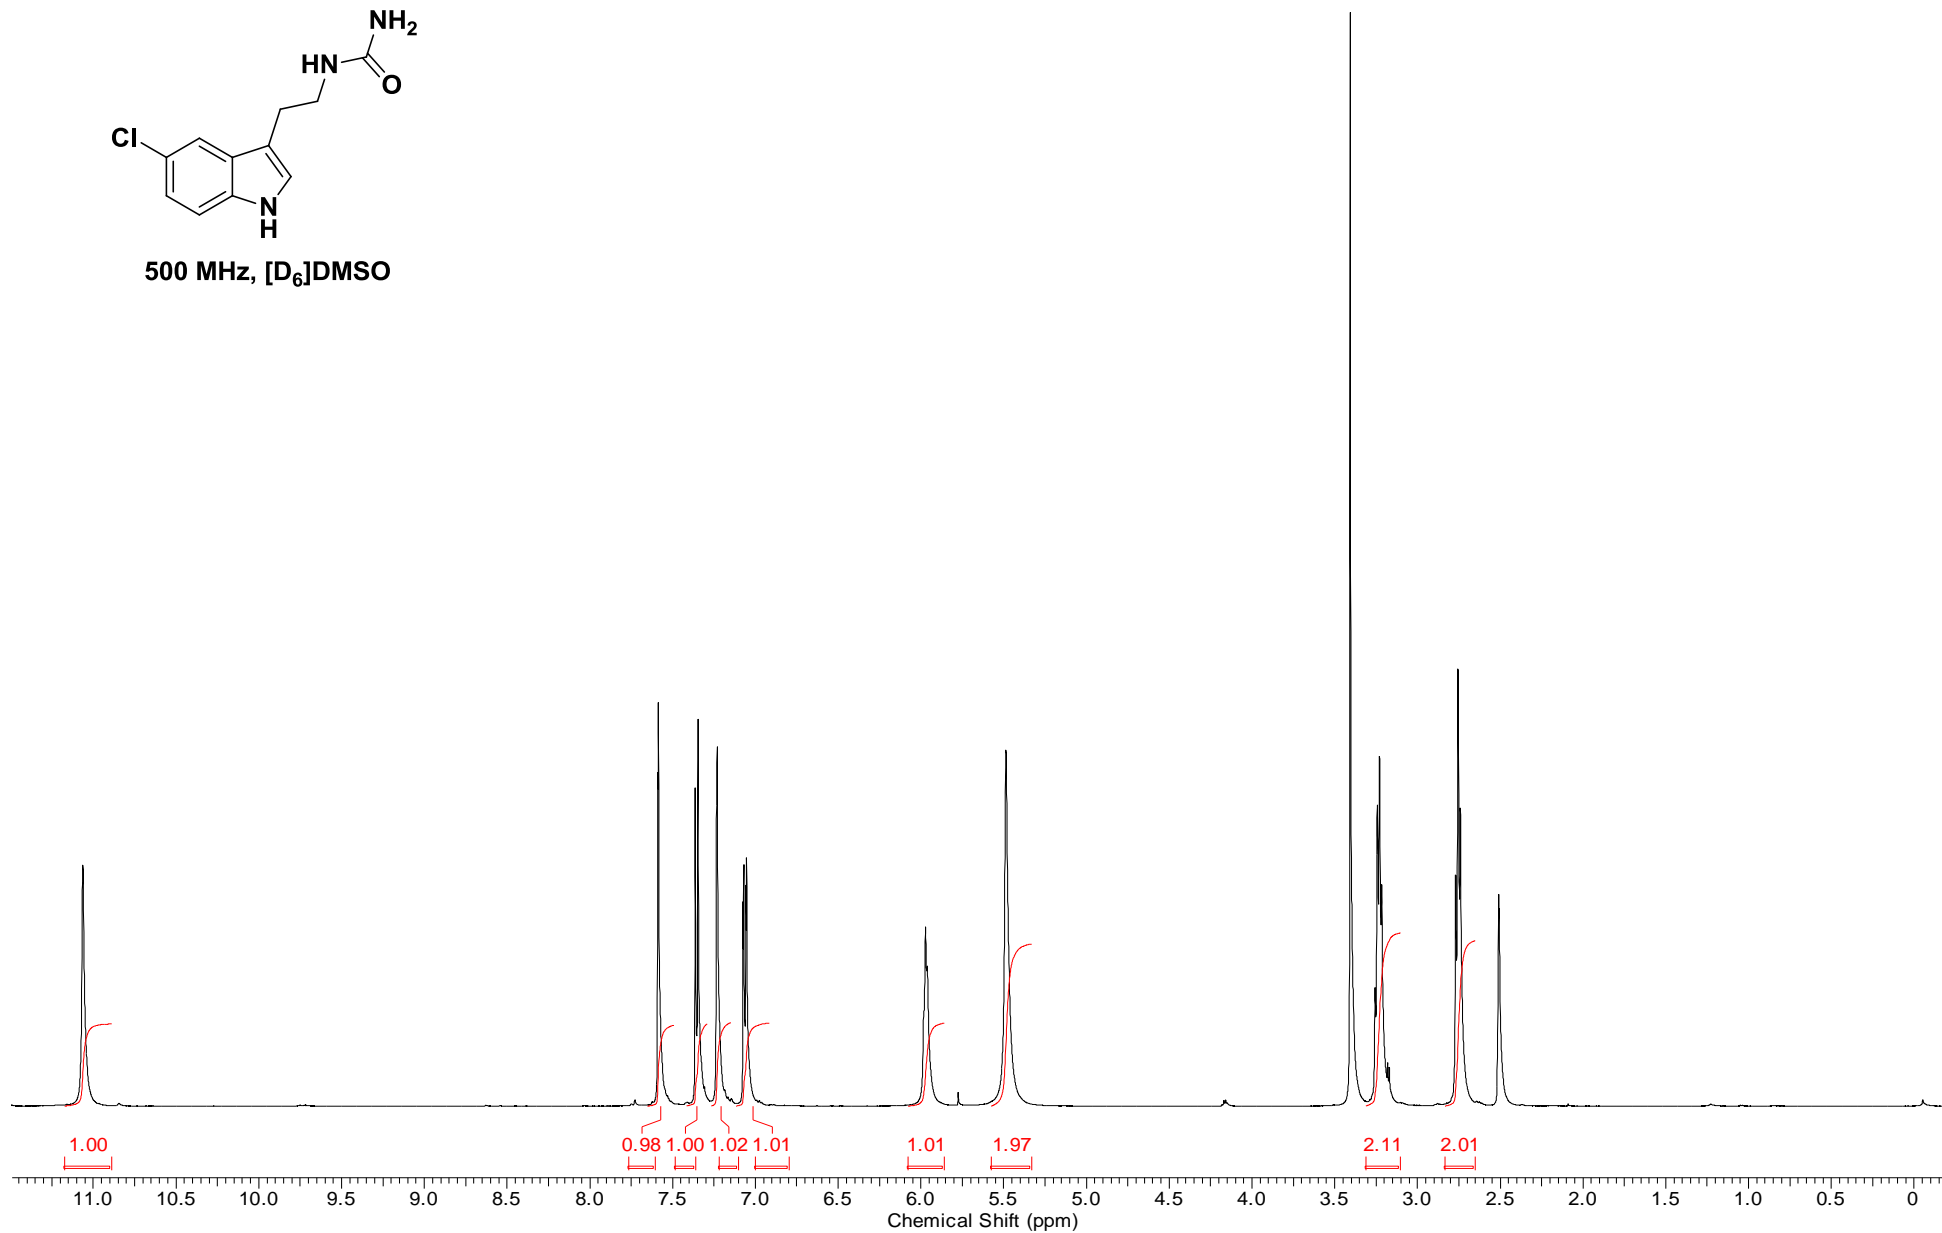

### 3.4.2 $^{13}\text{C}$ NMR of compound 5d

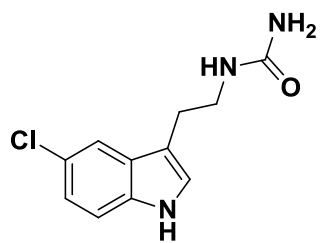

125 MHz,  $[\text{D}_6]\text{DMSO}$

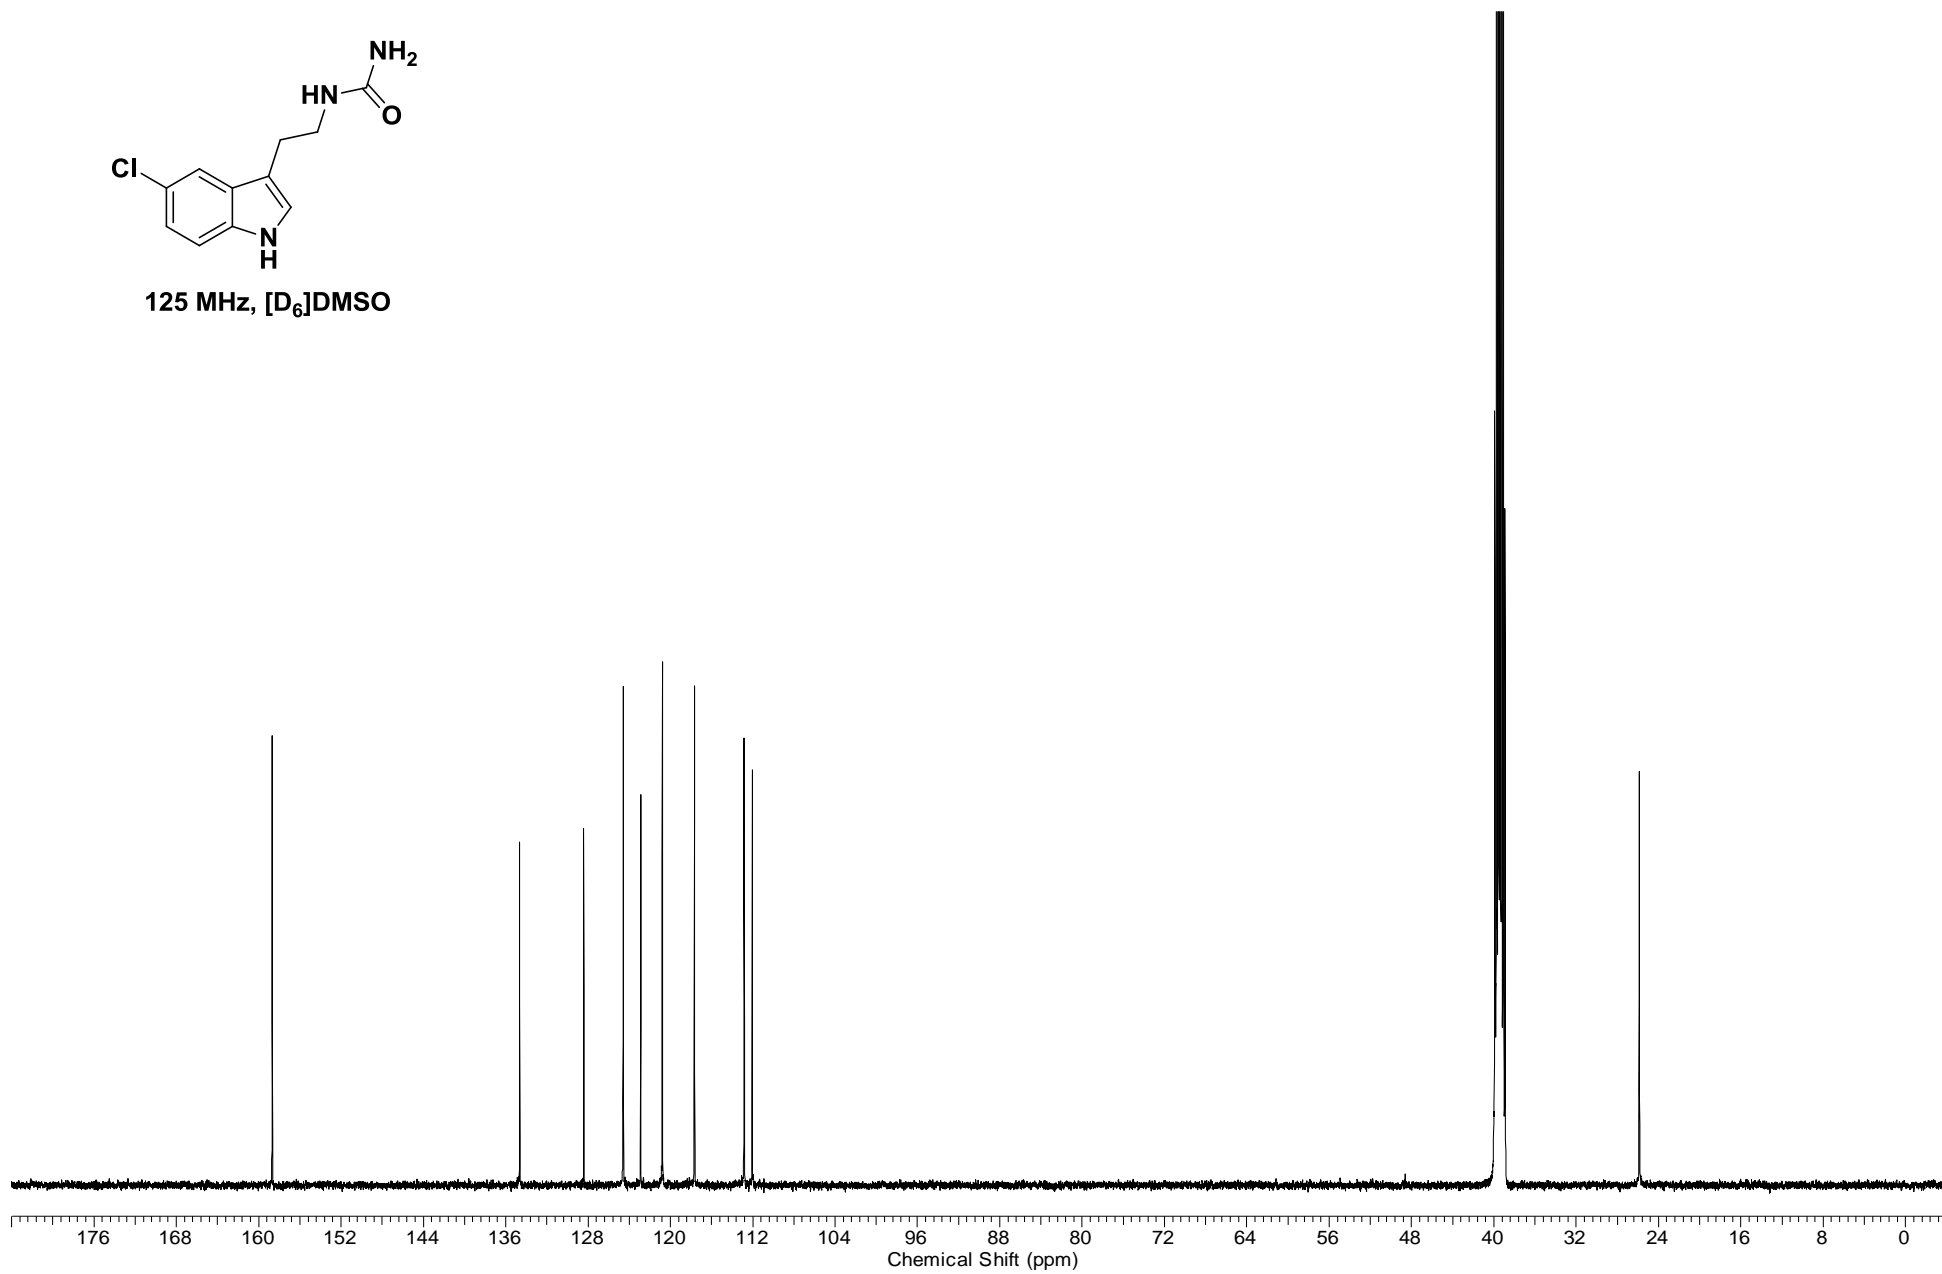



### 3.5.1 $^1\text{H}$ NMR of compound 5e

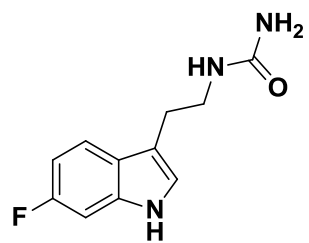

500 MHz,  $[\text{D}_6]\text{DMSO}$

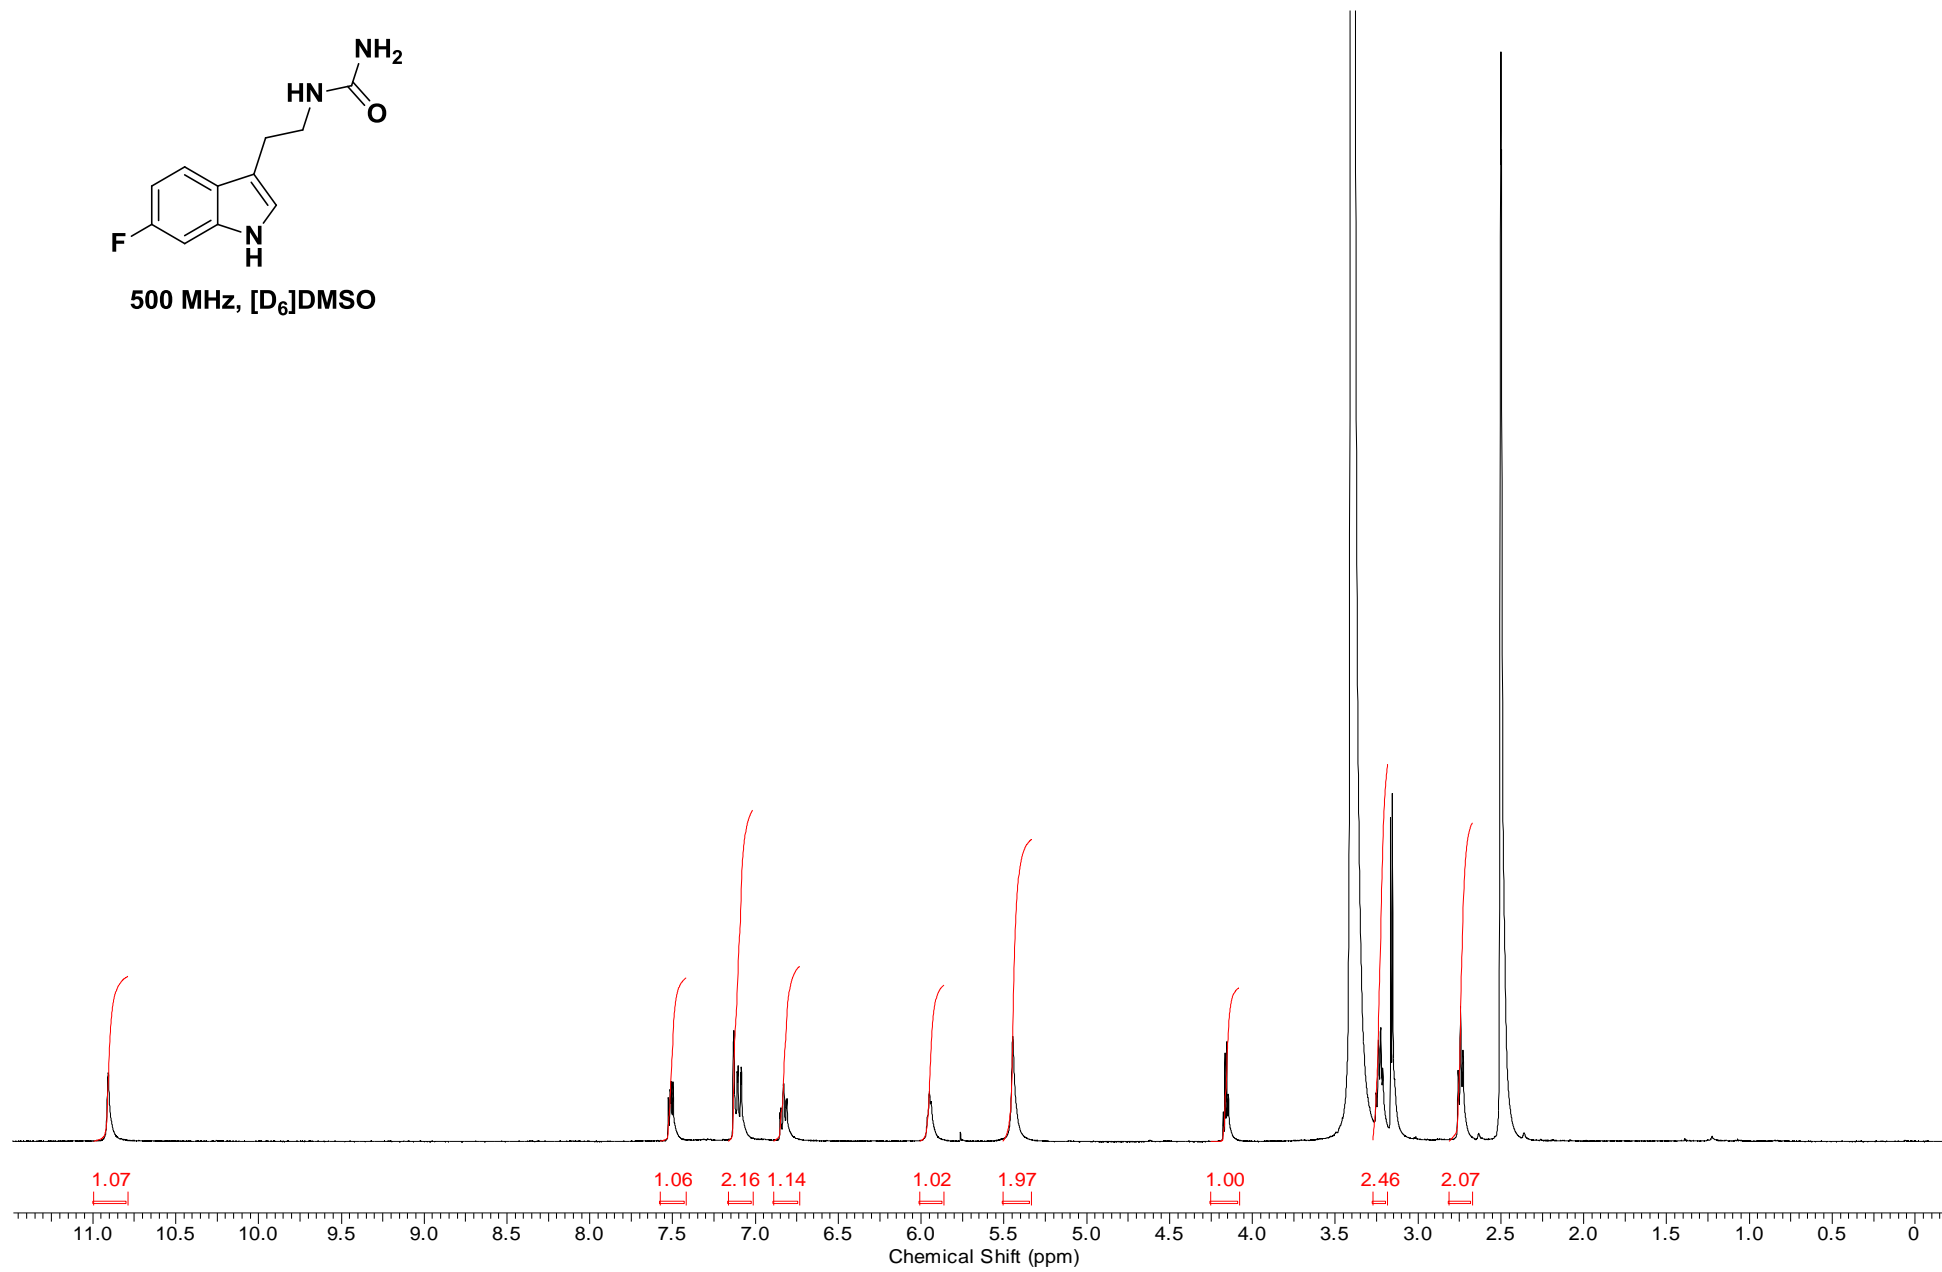

### 3.5.2 $^{13}\text{C}$ NMR of compound 5e

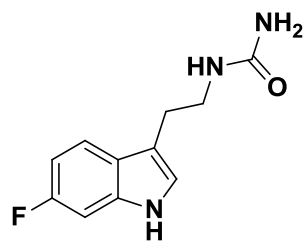

125 MHz,  $[\text{D}_6]\text{DMSO}$

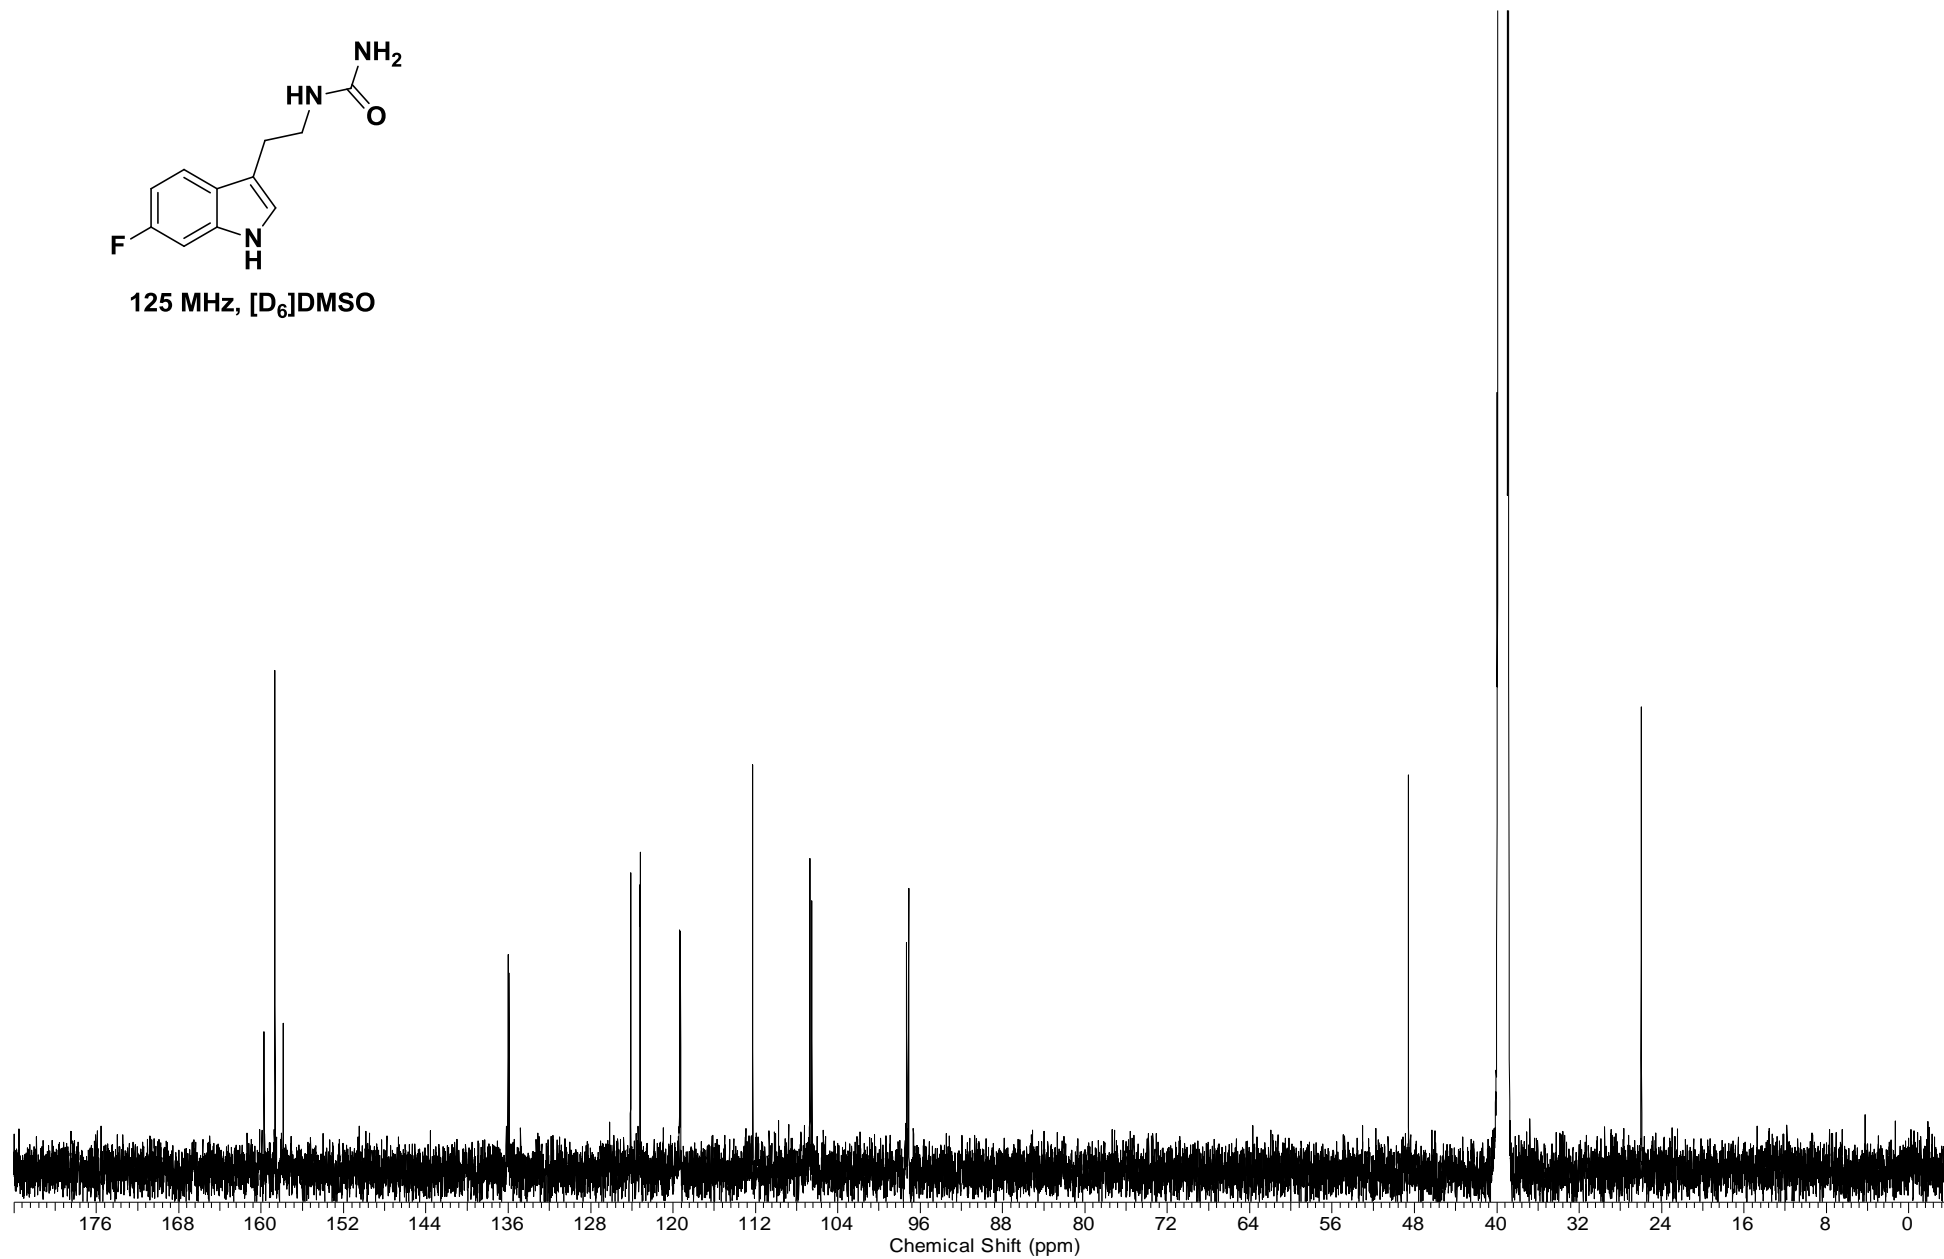

### 3.6.1 $^1\text{H}$ NMR of compound 5f

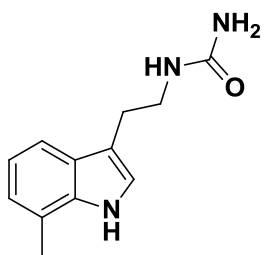

500 MHz,  $[\text{D}_6]\text{DMSO}$

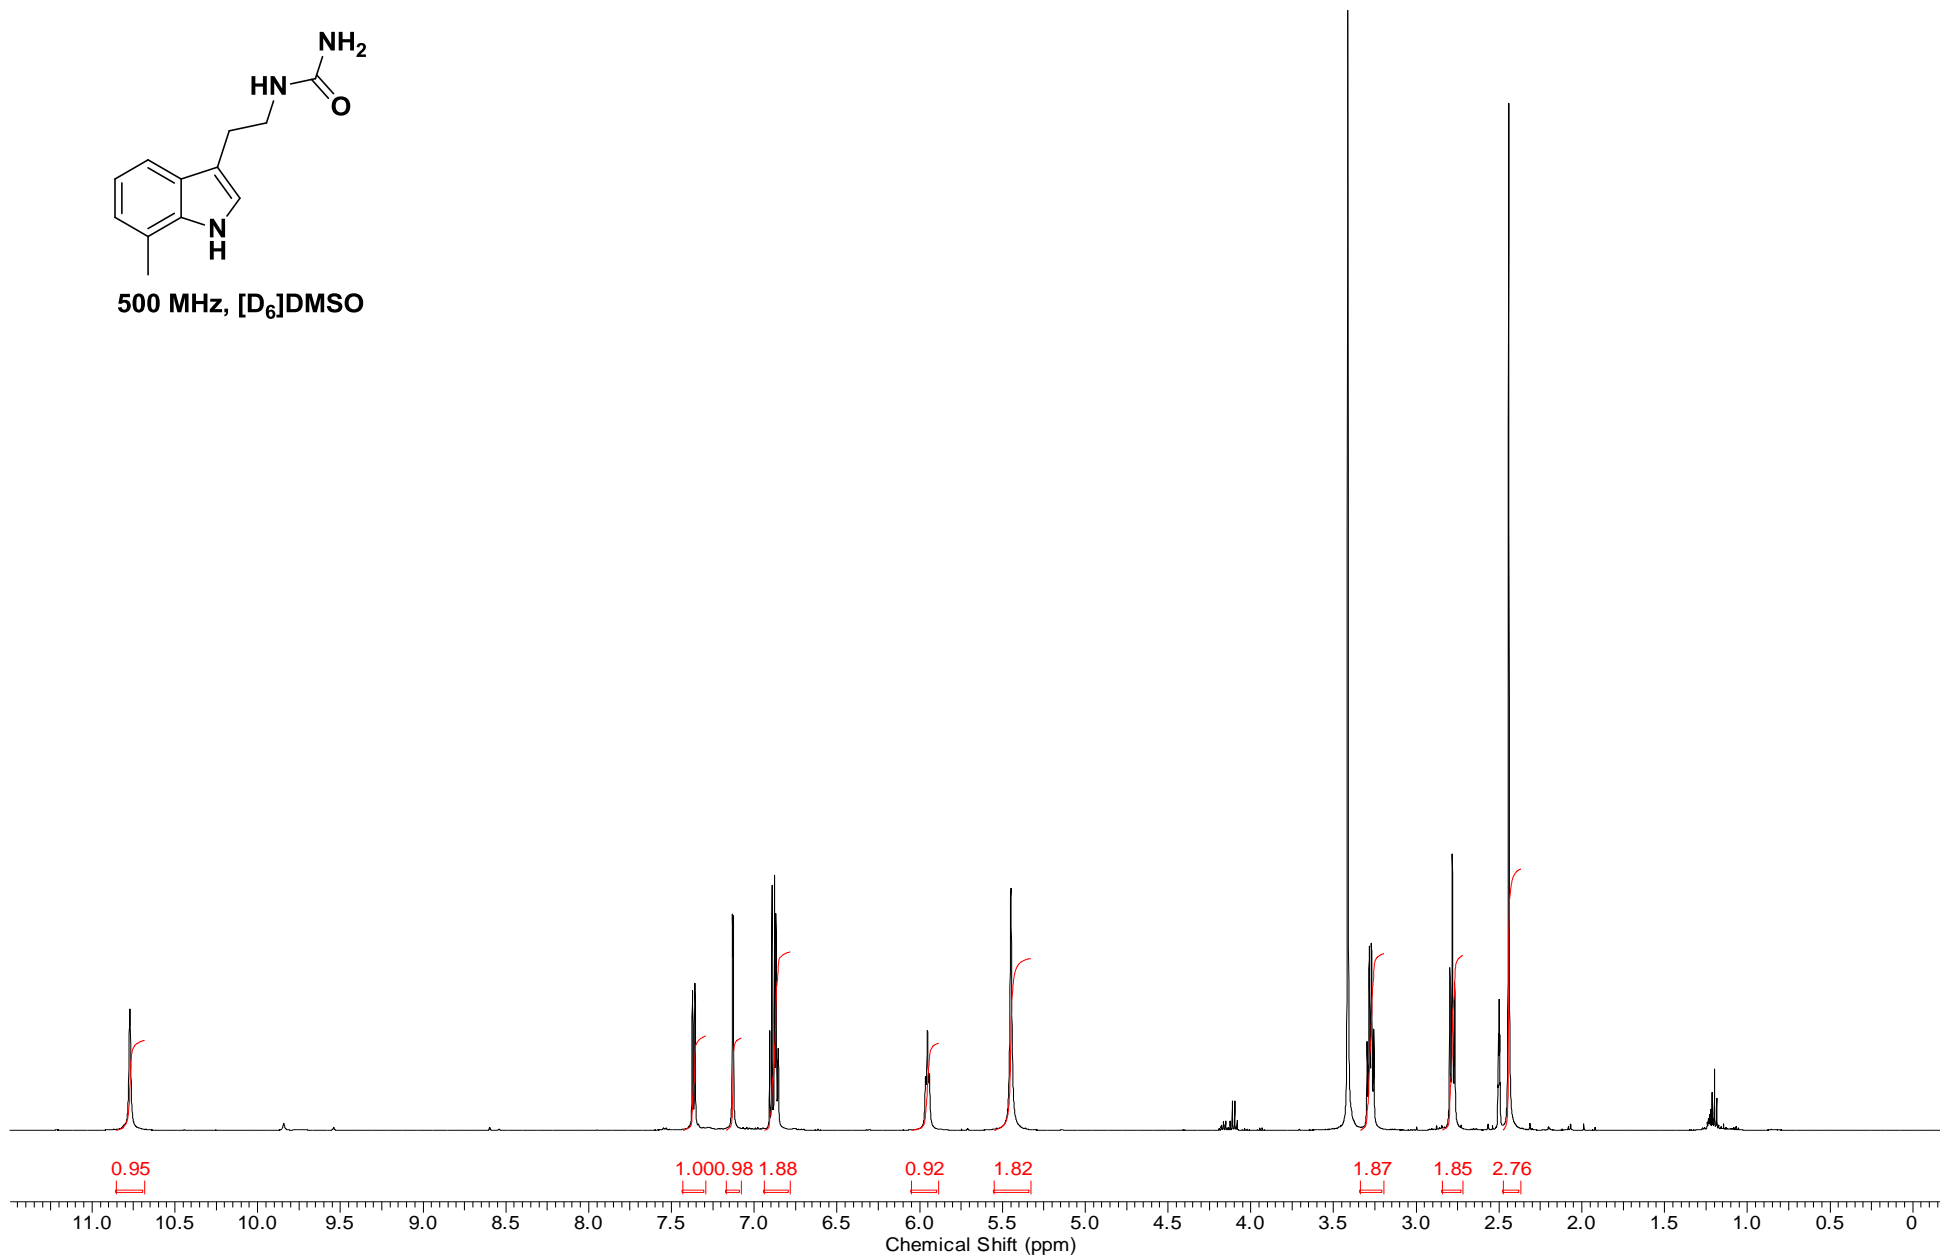

### 3.6.2 $^{13}\text{C}$ NMR of compound 5f

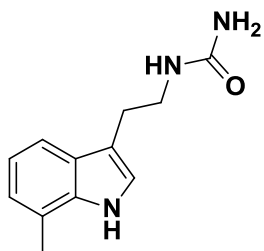

125 MHz,  $[\text{D}_6]\text{DMSO}$

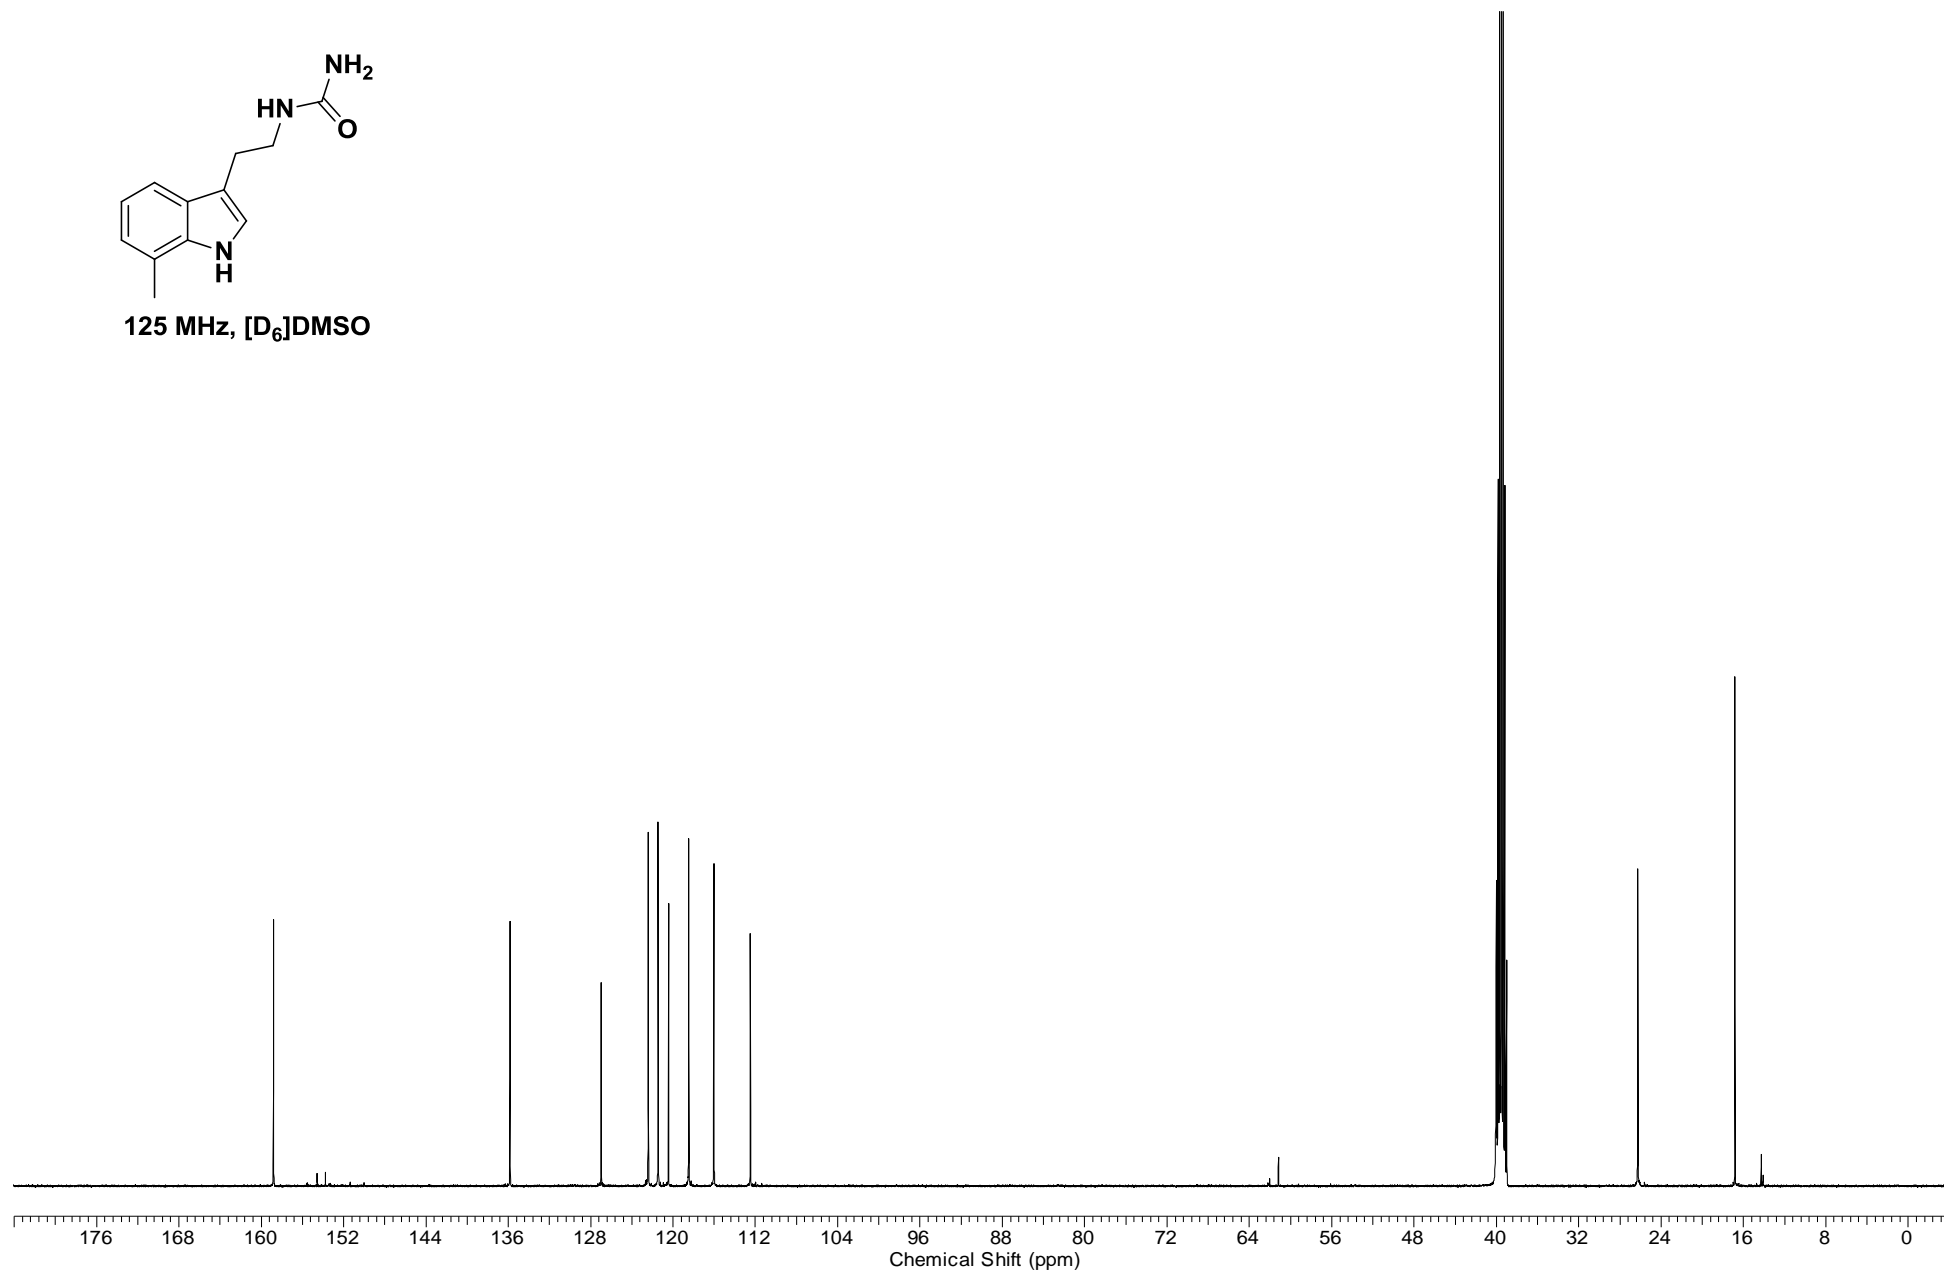

### 3.7.1 $^1\text{H}$ NMR of compound 5g

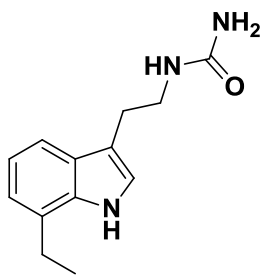

400 MHz,  $[\text{D}_6]\text{DMSO}$

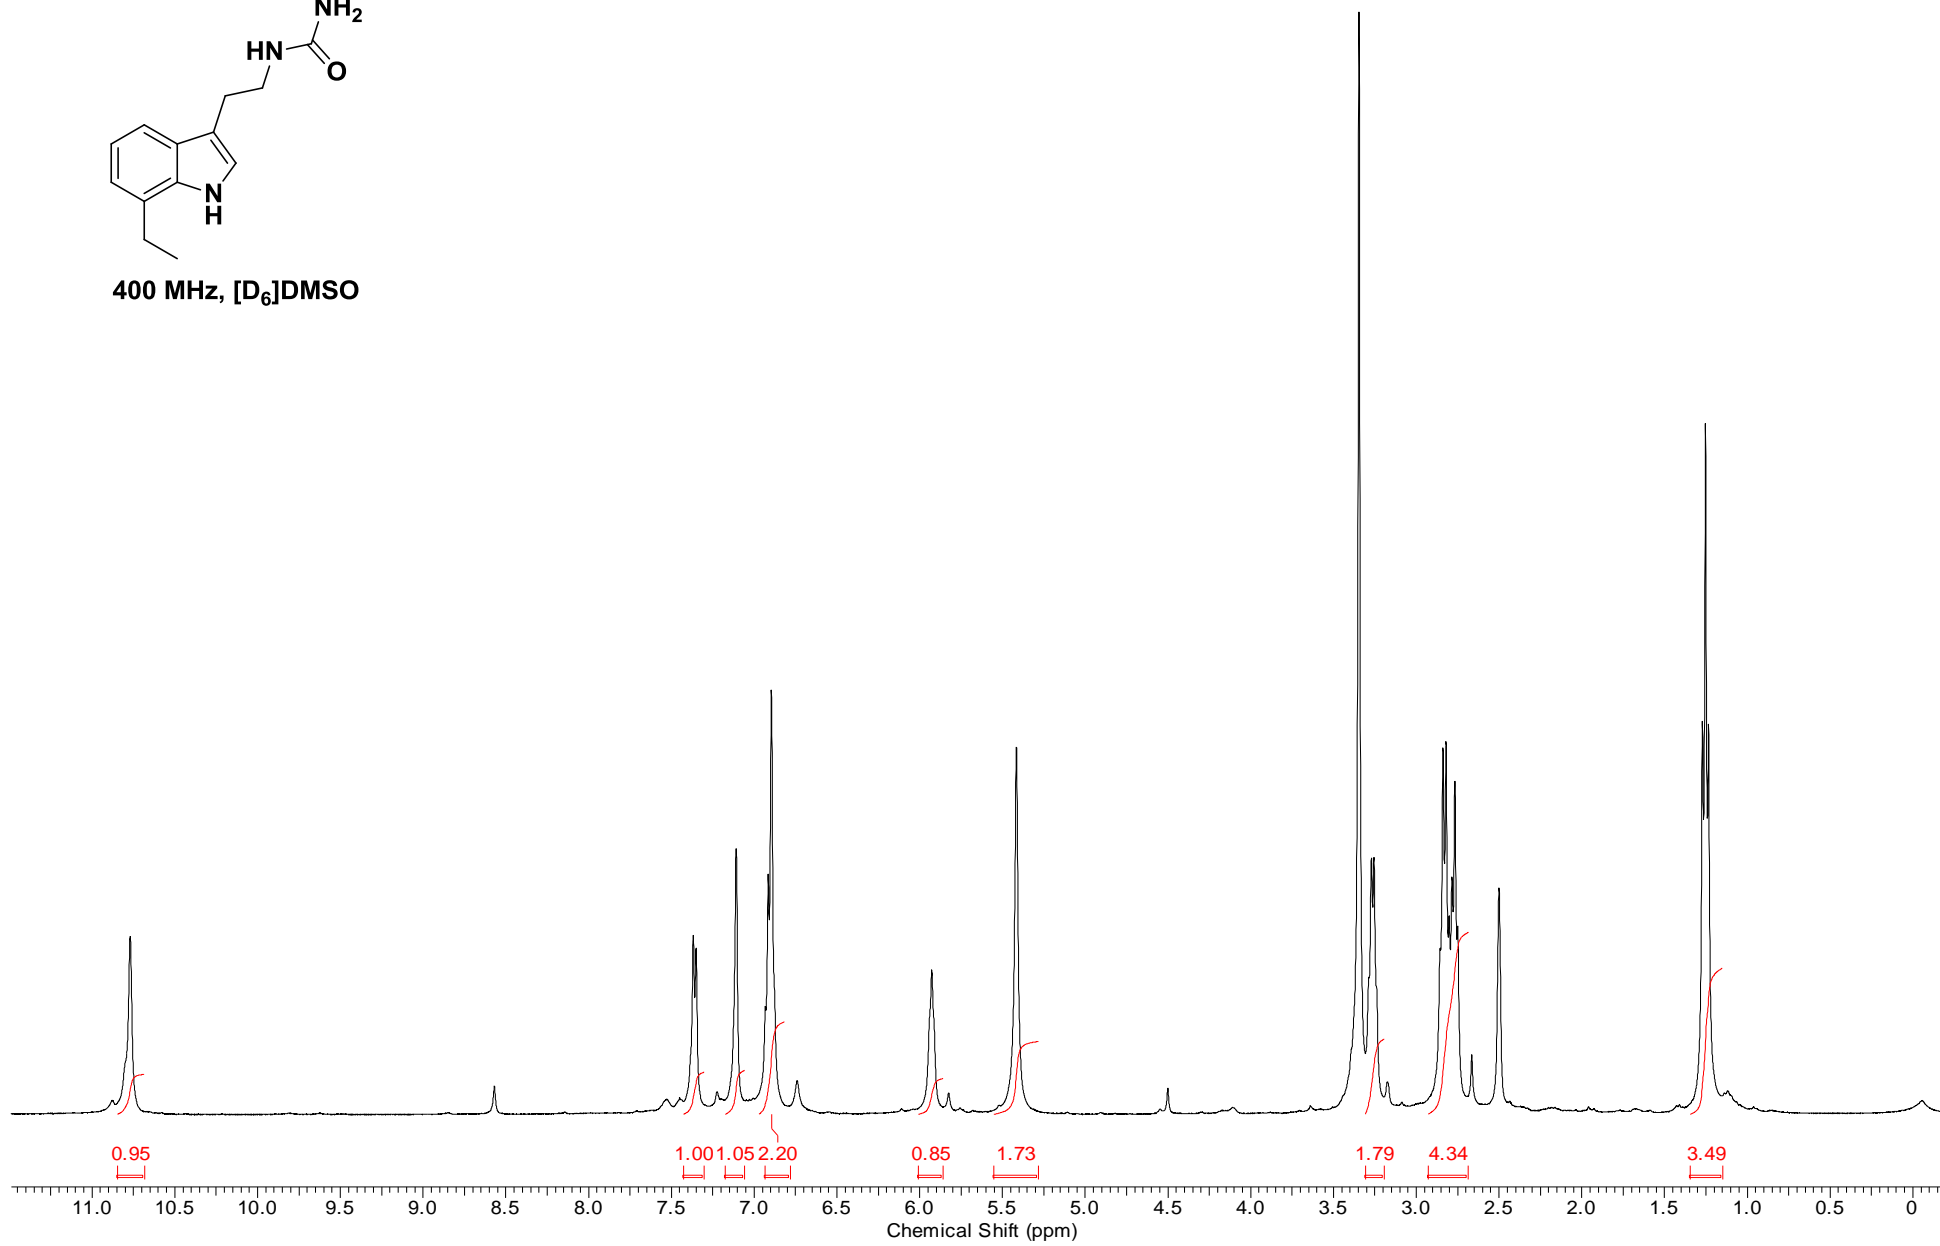

### 3.7.2 $^{13}\text{C}$ NMR of compound 5g

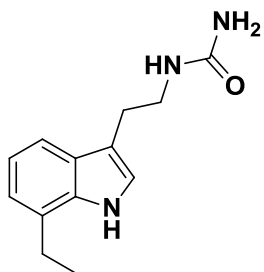

100 MHz,  $[\text{D}_6]\text{DMSO}$

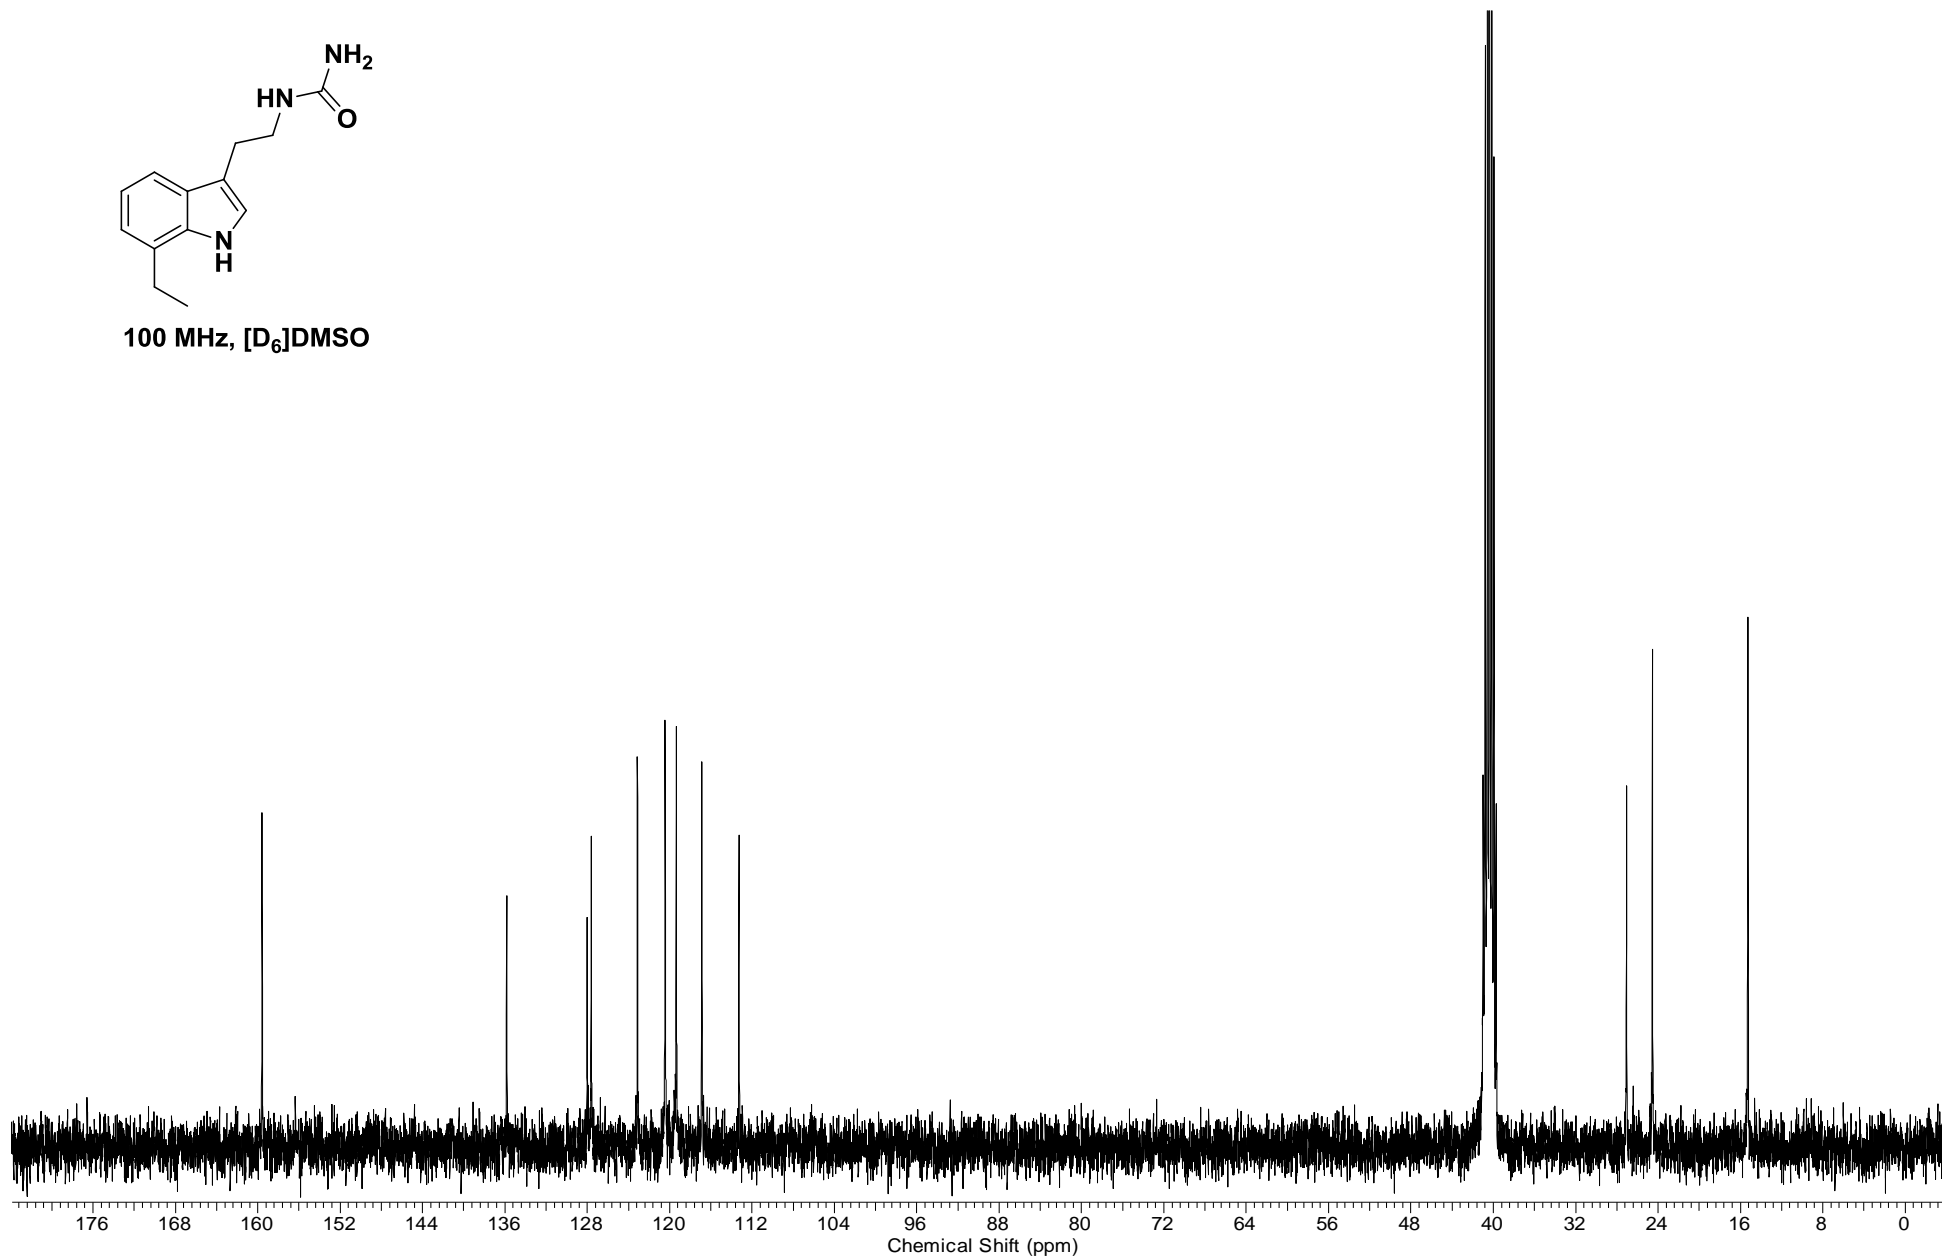

### 3.8.1 $^1\text{H}$ NMR of compound 5j

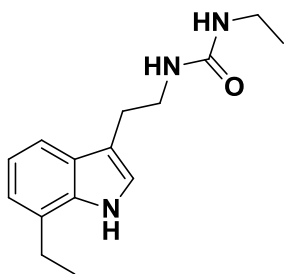

500 MHz,  $[\text{D}_6]\text{DMSO}$

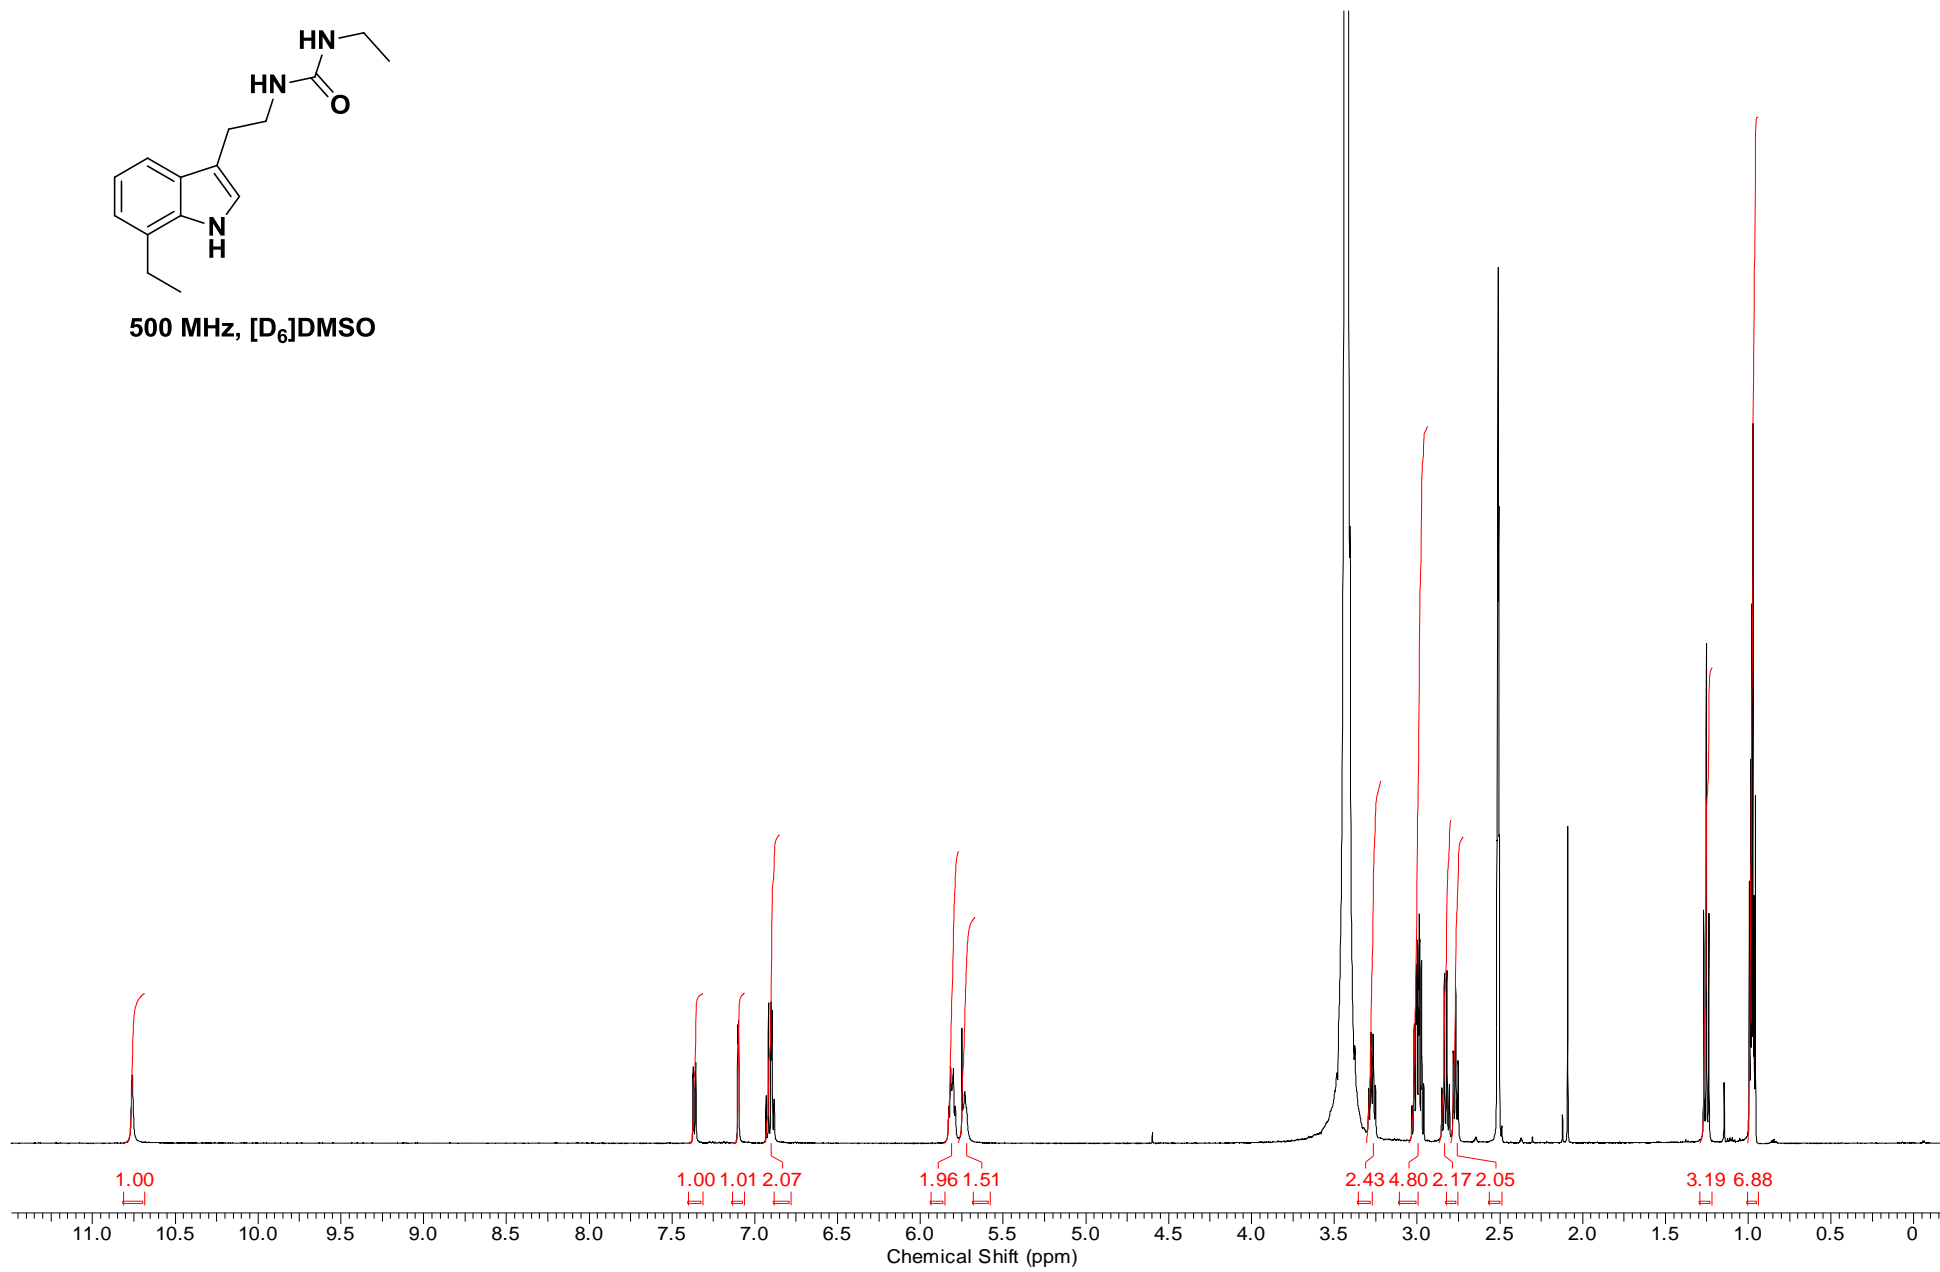

### 3.8.2 $^{13}\text{C}$ NMR of compound 5j

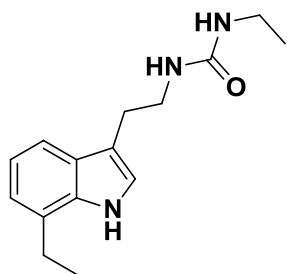

125 MHz,  $[\text{D}_6]\text{DMSO}$

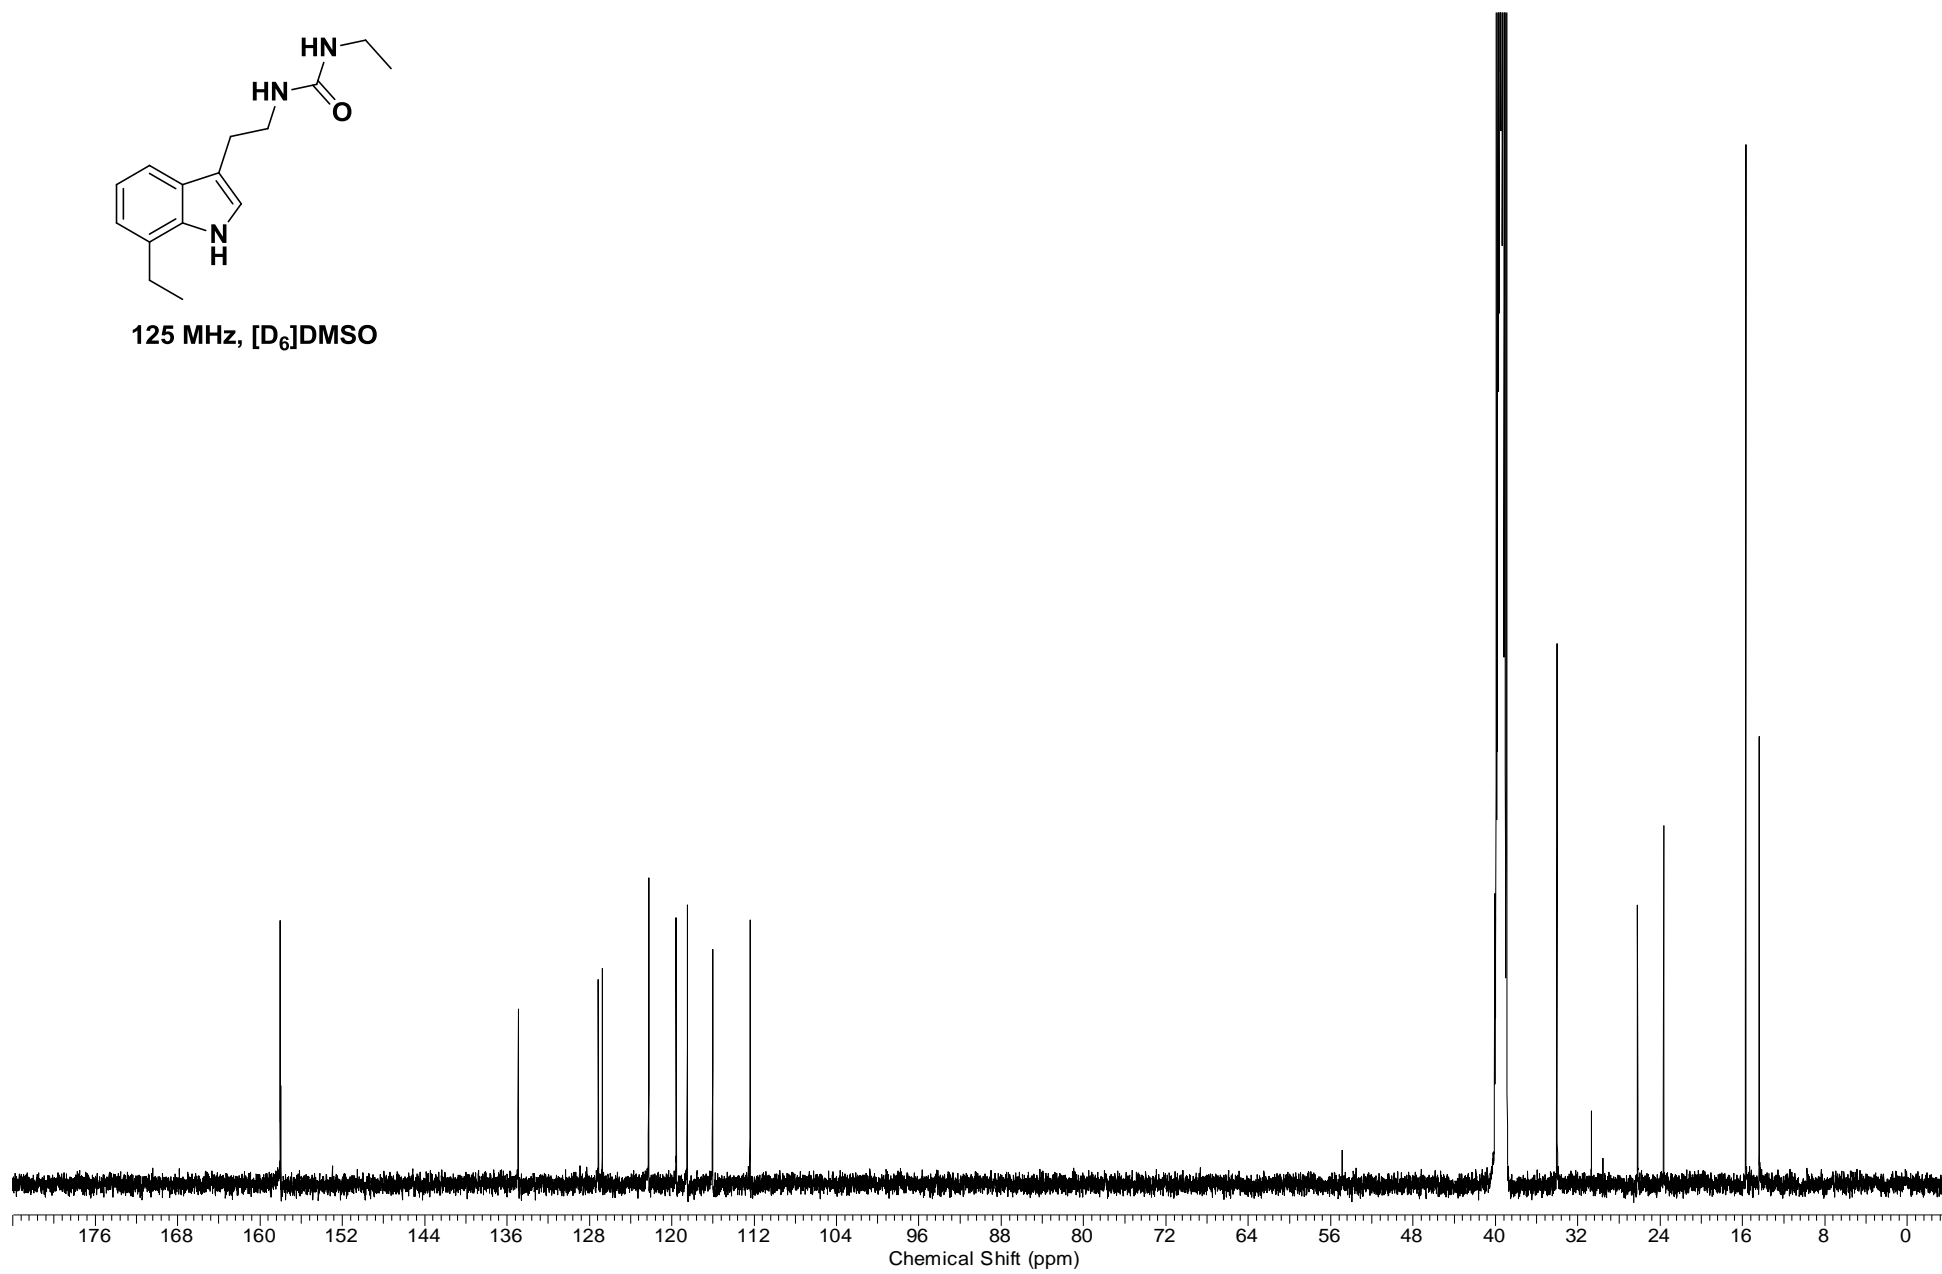



### 3.9.1 $^1\text{H}$ NMR of compound 5k

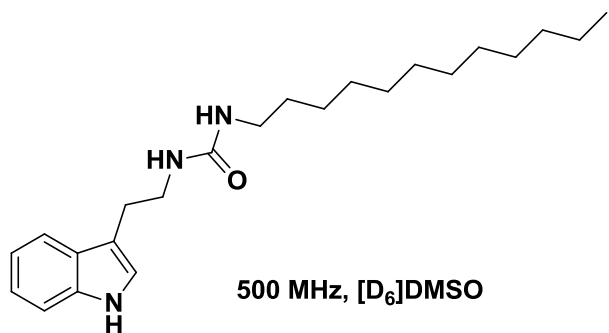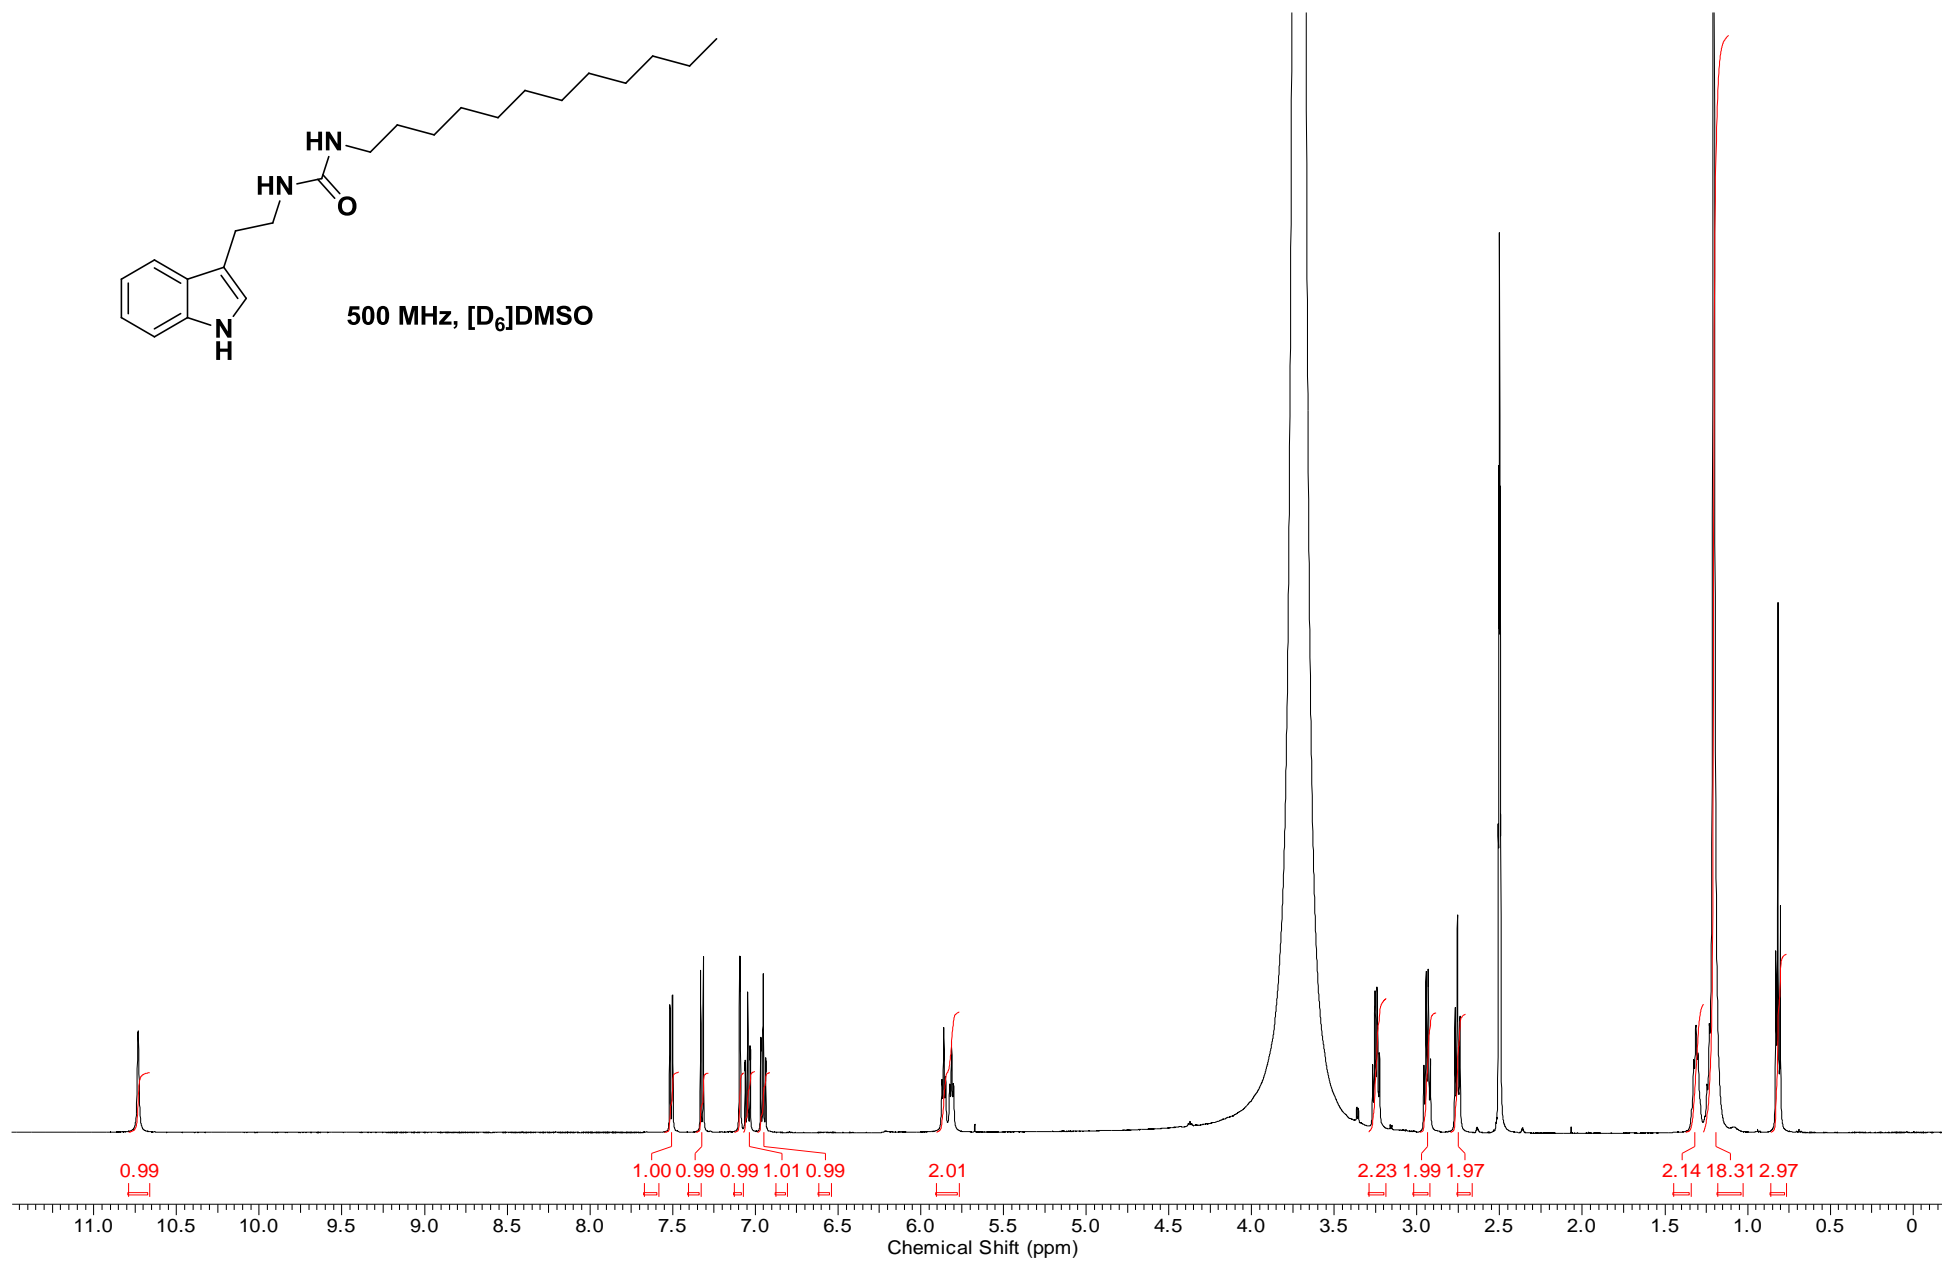

### 3.9.2 $^{13}\text{C}$ NMR of compound 5k

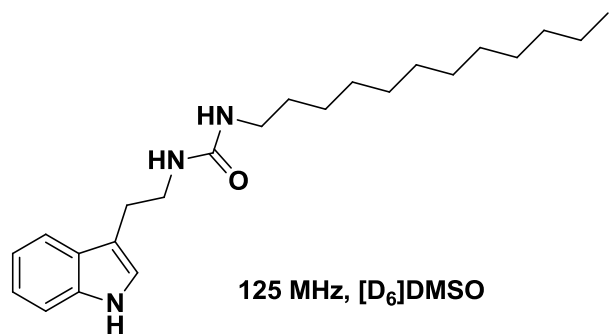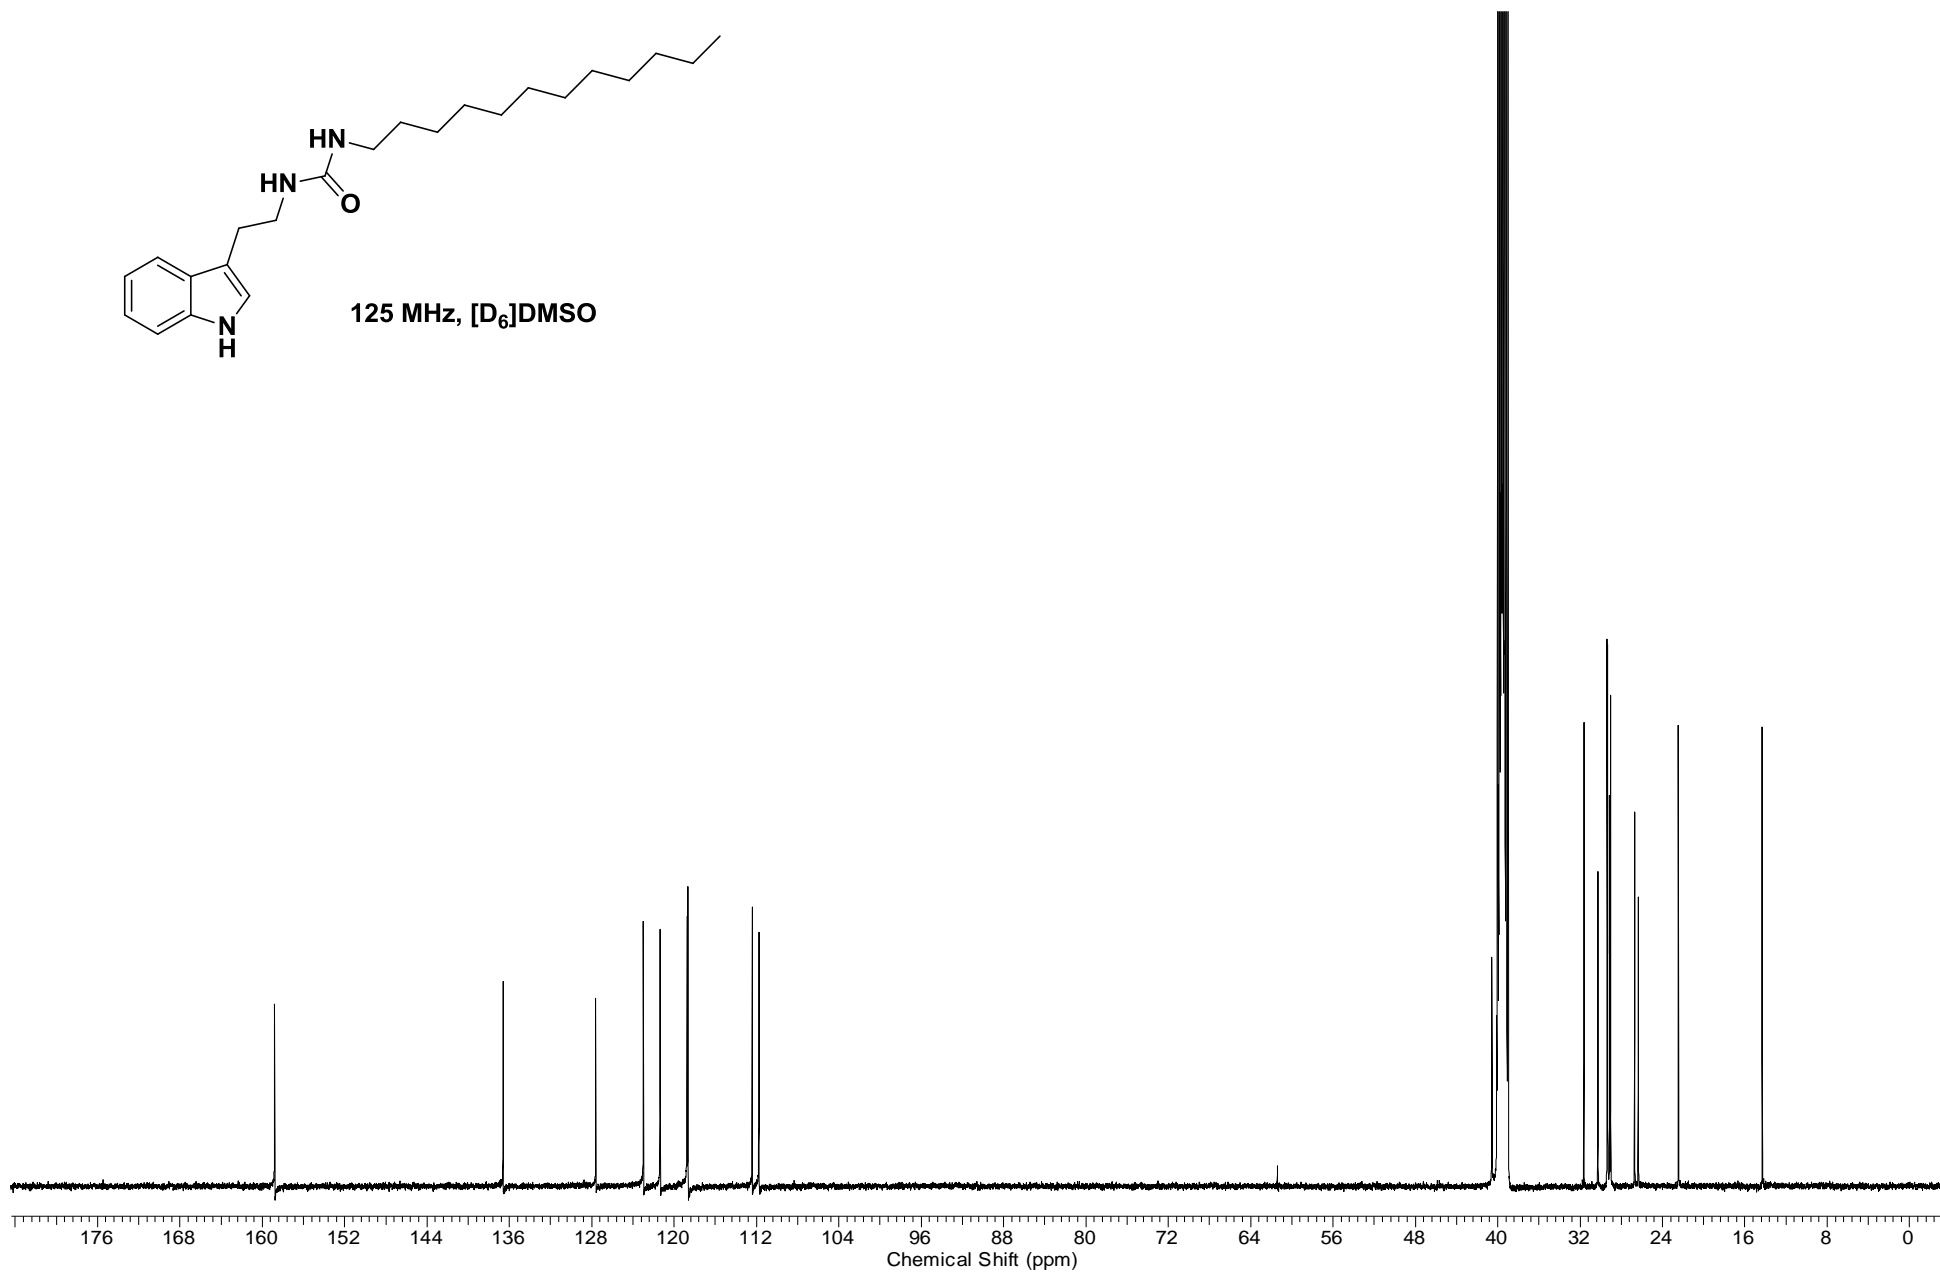

### 3.10.1 $^1\text{H}$ NMR of compound 51

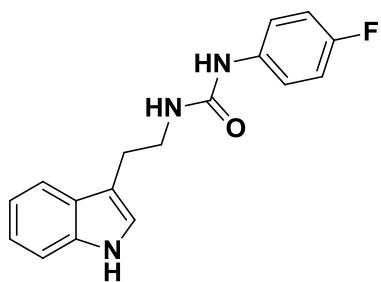

500 MHz,  $[\text{D}_6]\text{DMSO}$

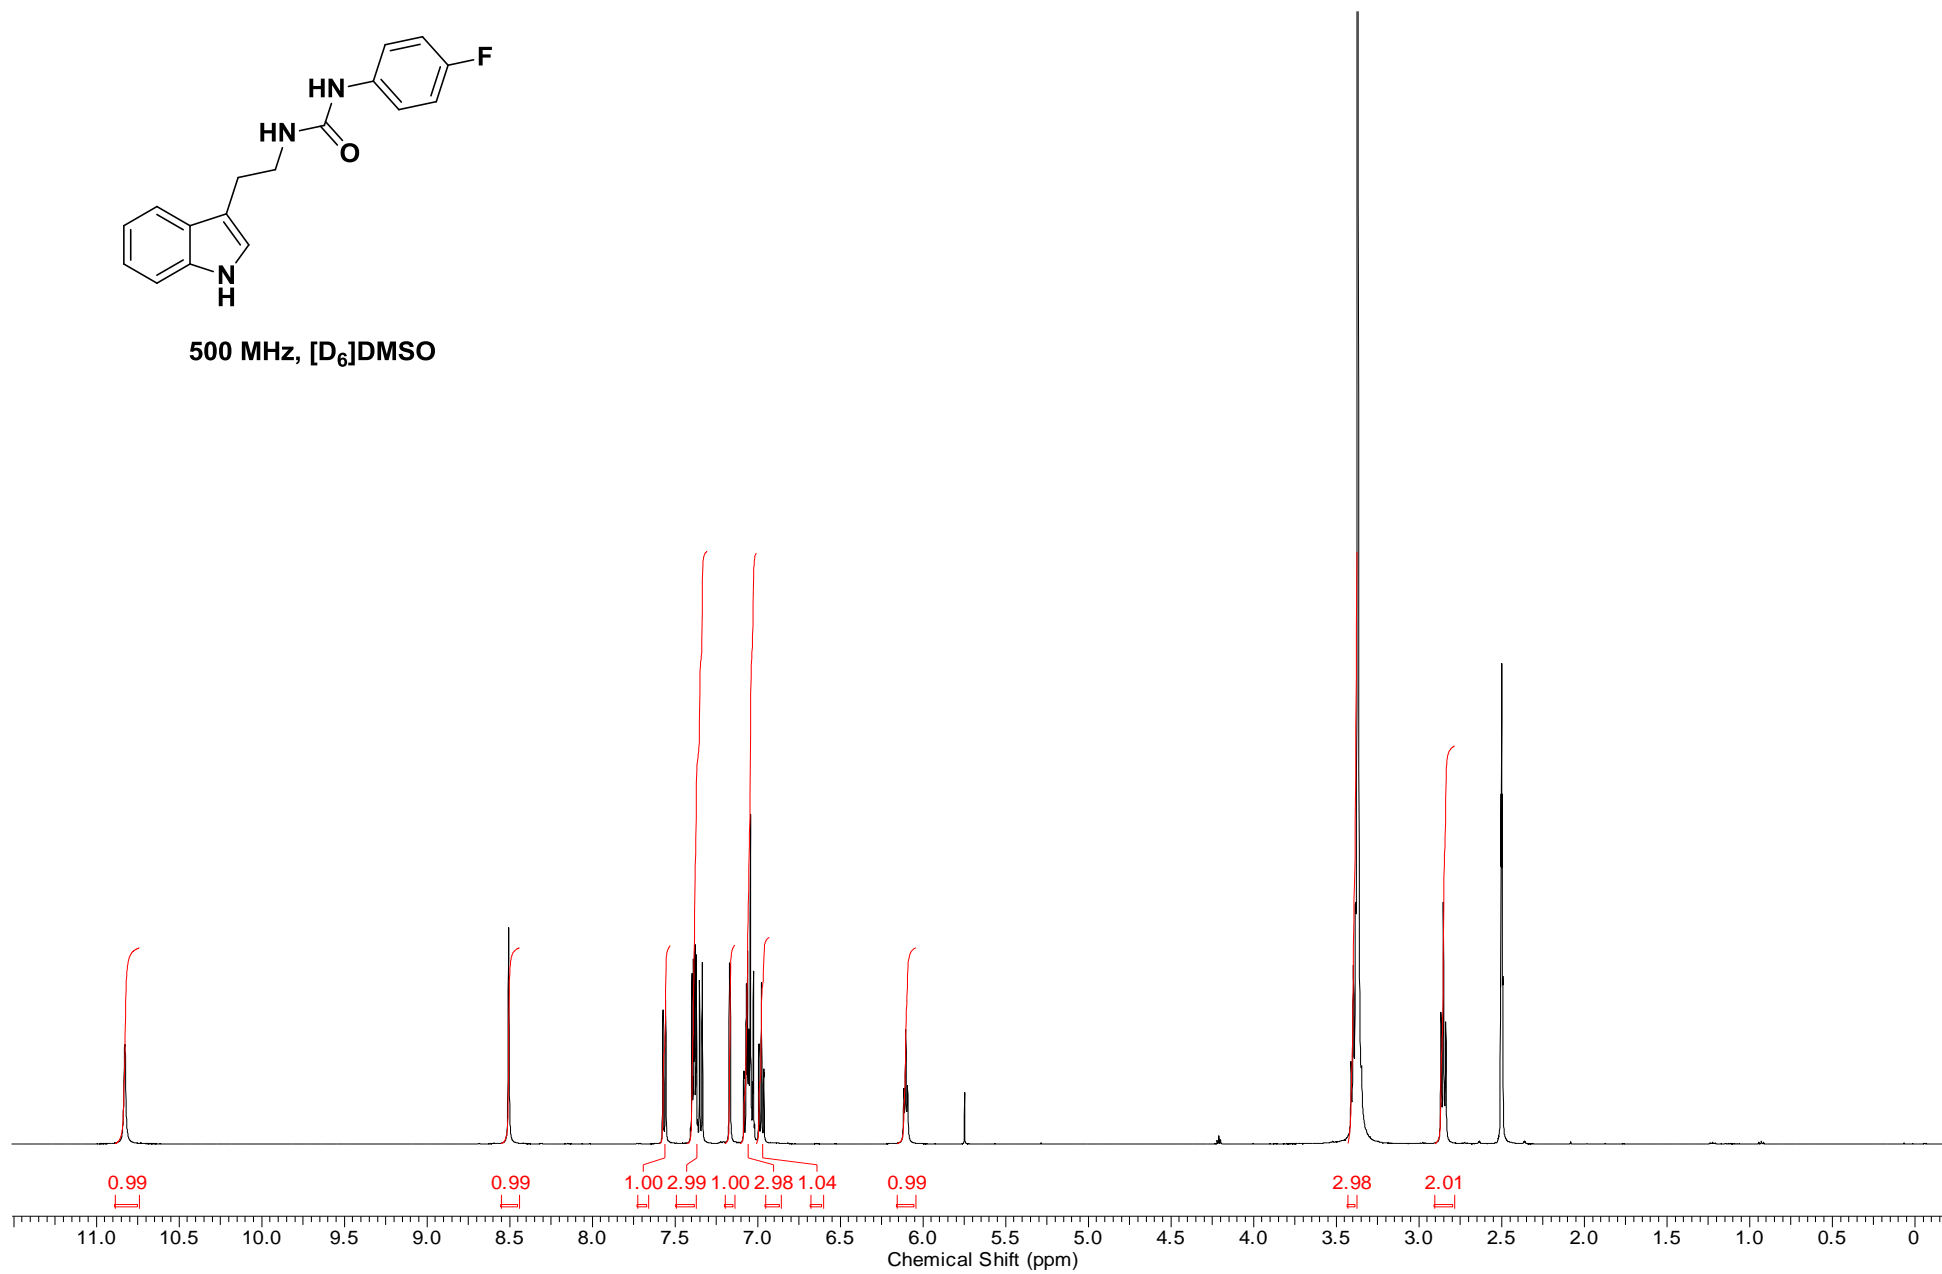

### 3.10.2 $^{13}\text{C}$ NMR of compound 5l

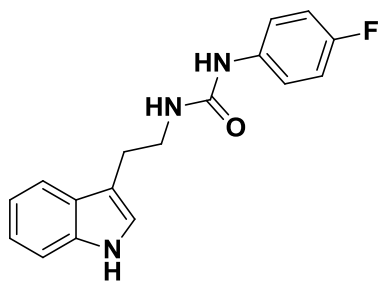

125 MHz,  $[\text{D}_6]\text{DMSO}$

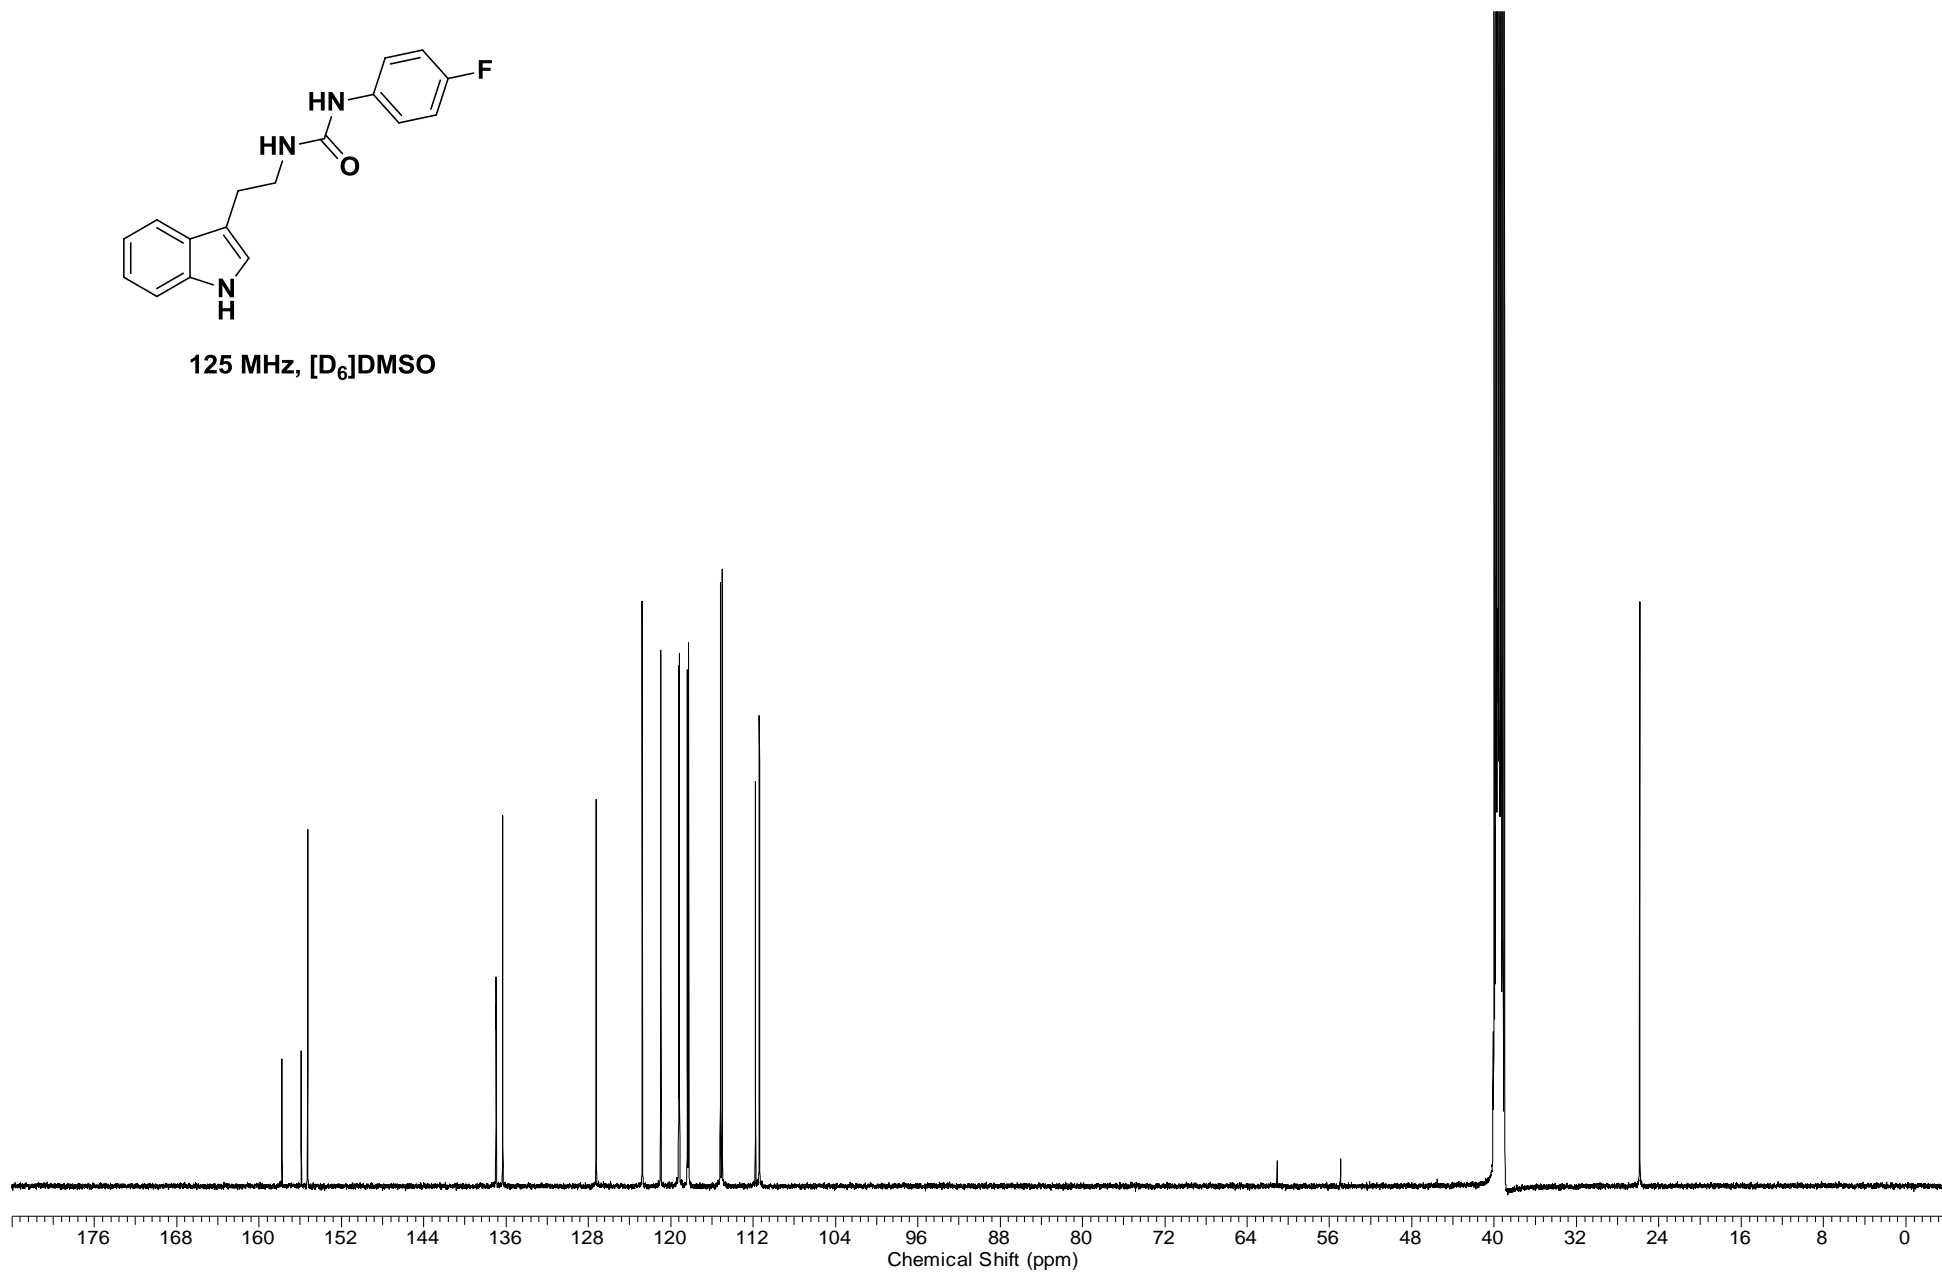

### 3.11.1 $^1\text{H}$ NMR of compound 5m

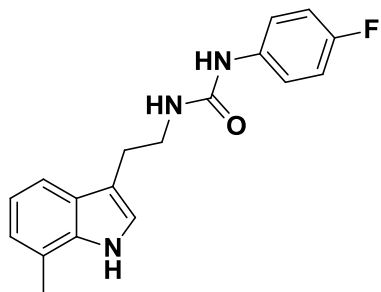

500 MHz,  $[\text{D}_6]\text{DMSO}$

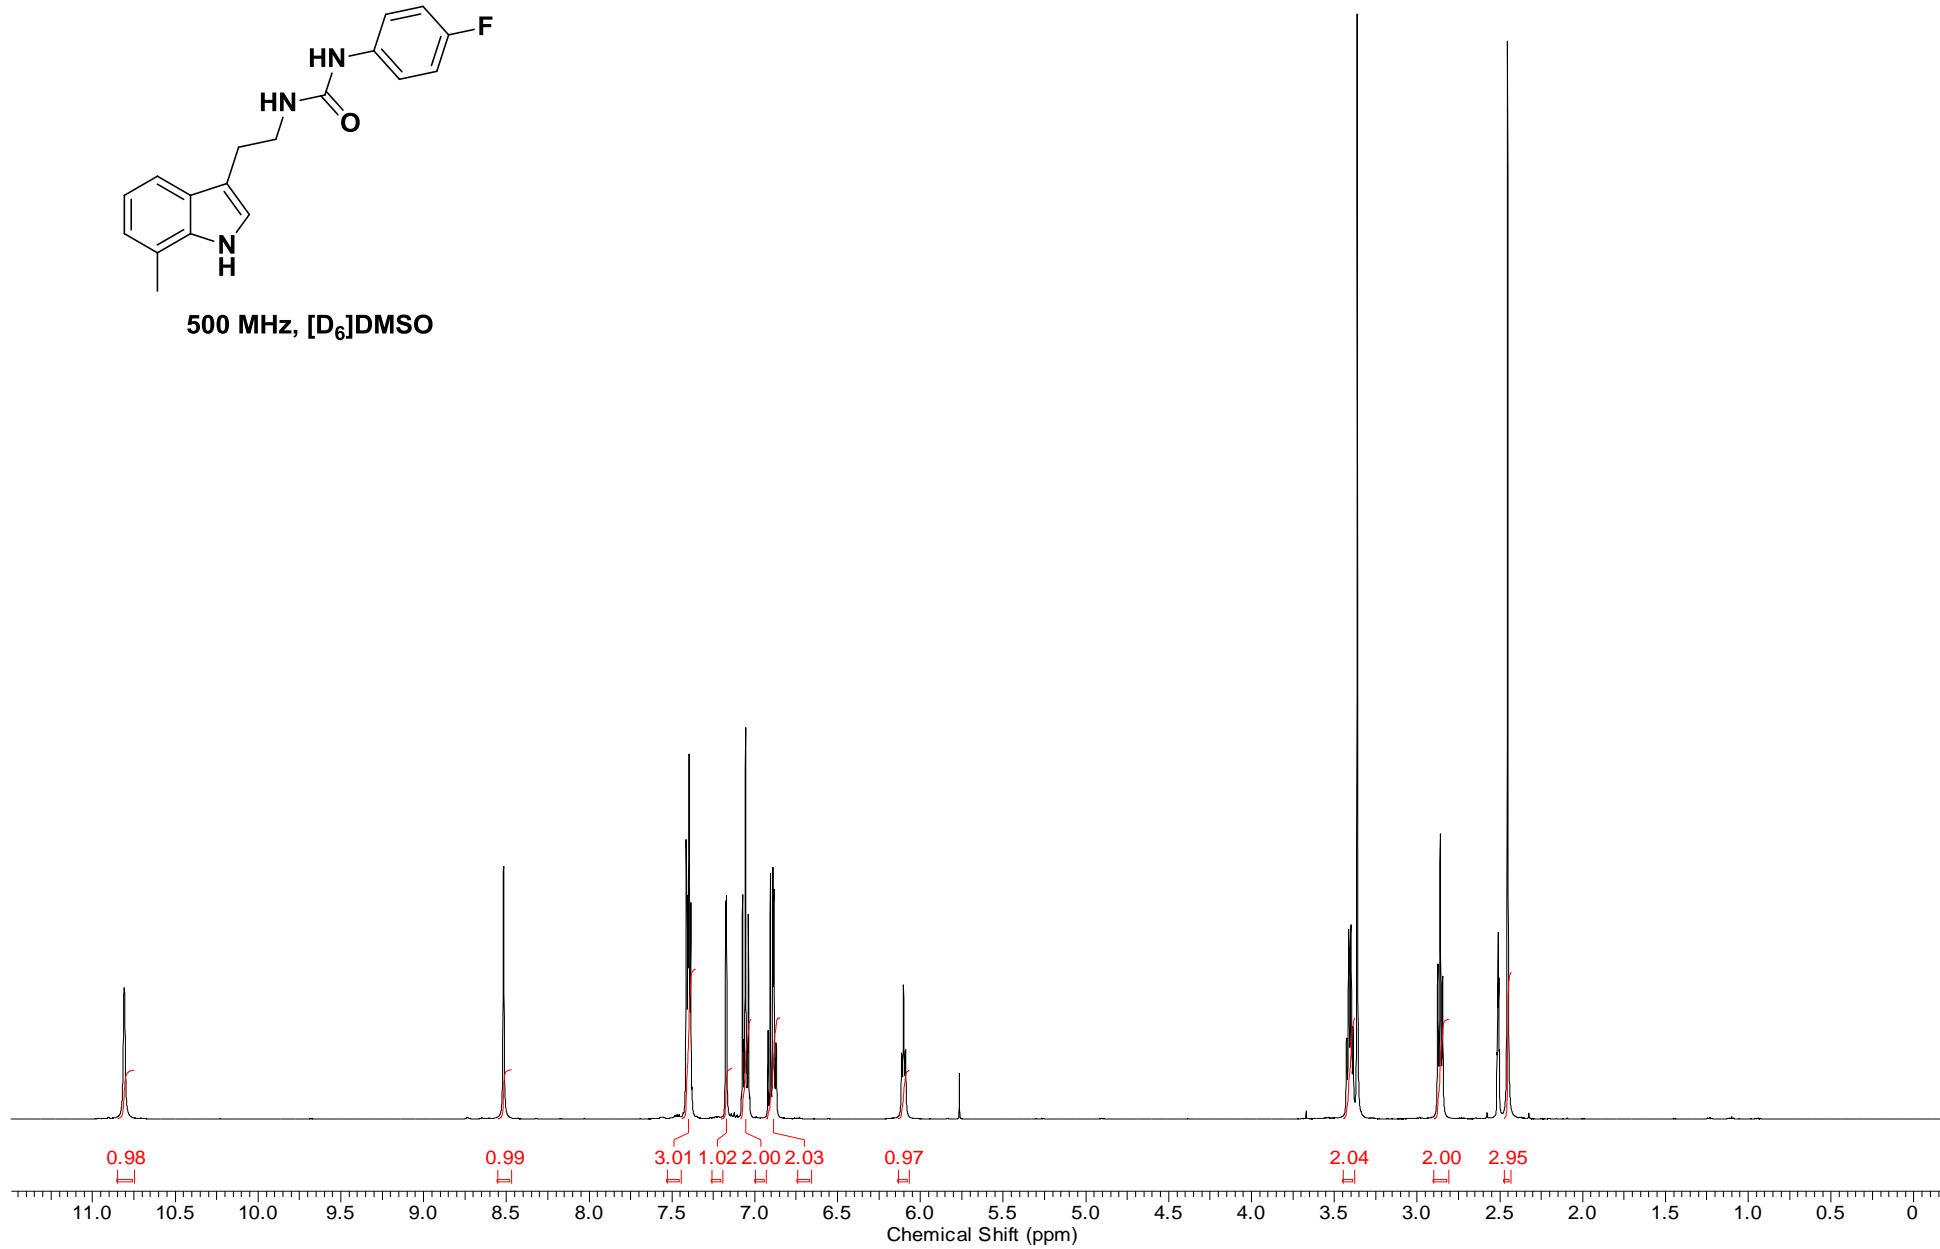

### 3.11.2 $^{13}\text{C}$ NMR of compound 5m

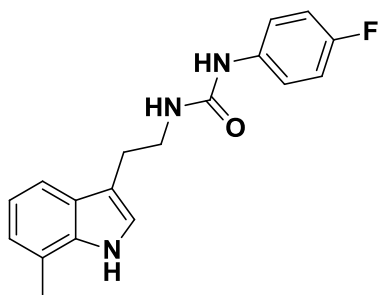

125 MHz,  $[\text{D}_6]\text{DMSO}$

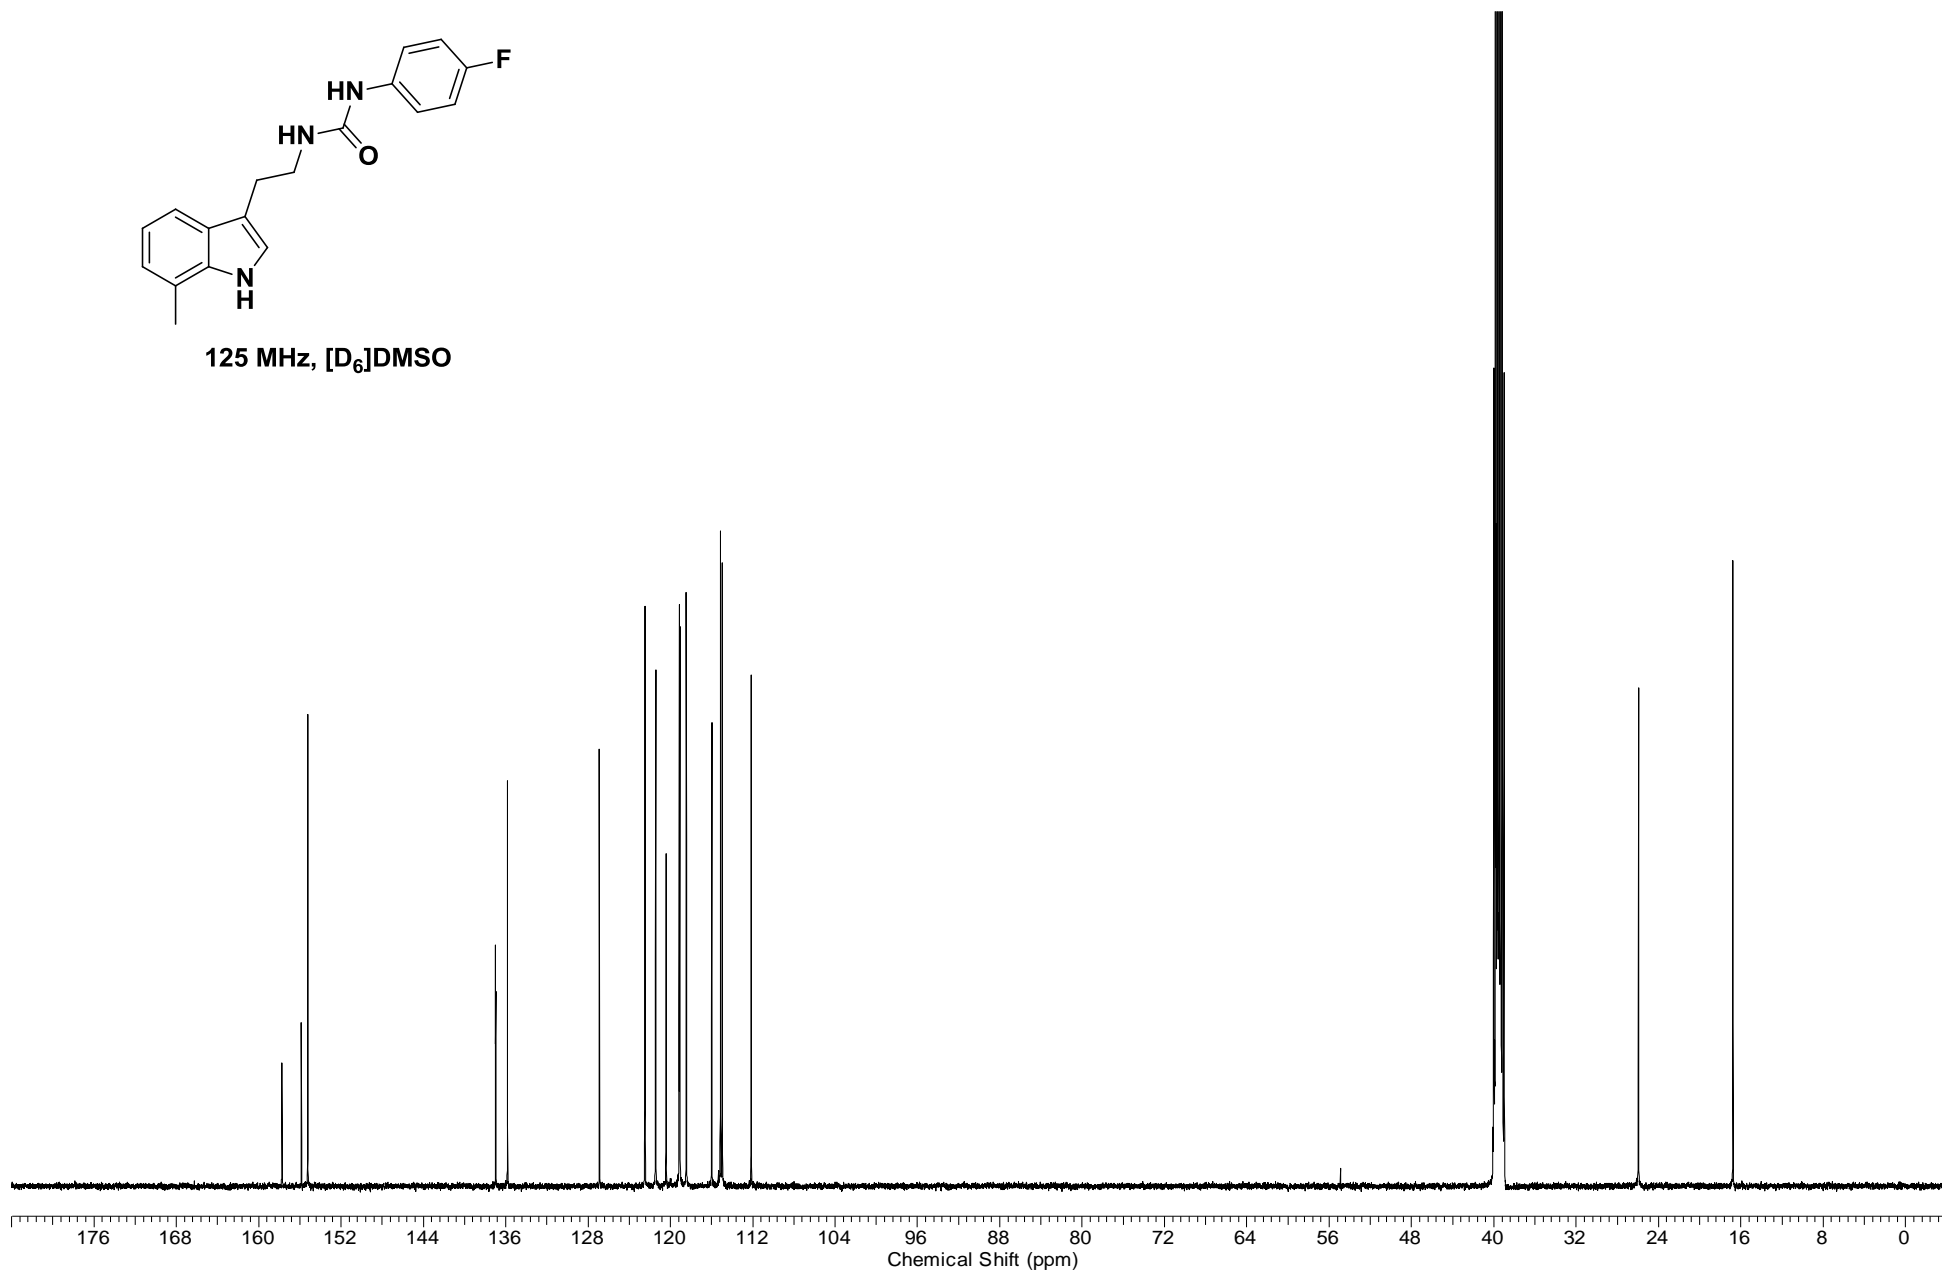

### 3.12.1 $^1\text{H}$ NMR of compound 5n

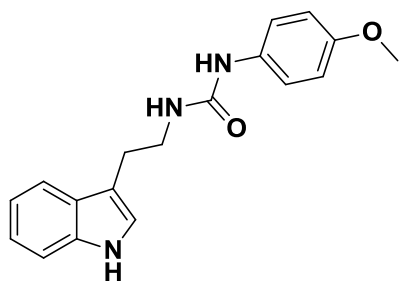

500 MHz,  $[\text{D}_6]\text{DMSO}$

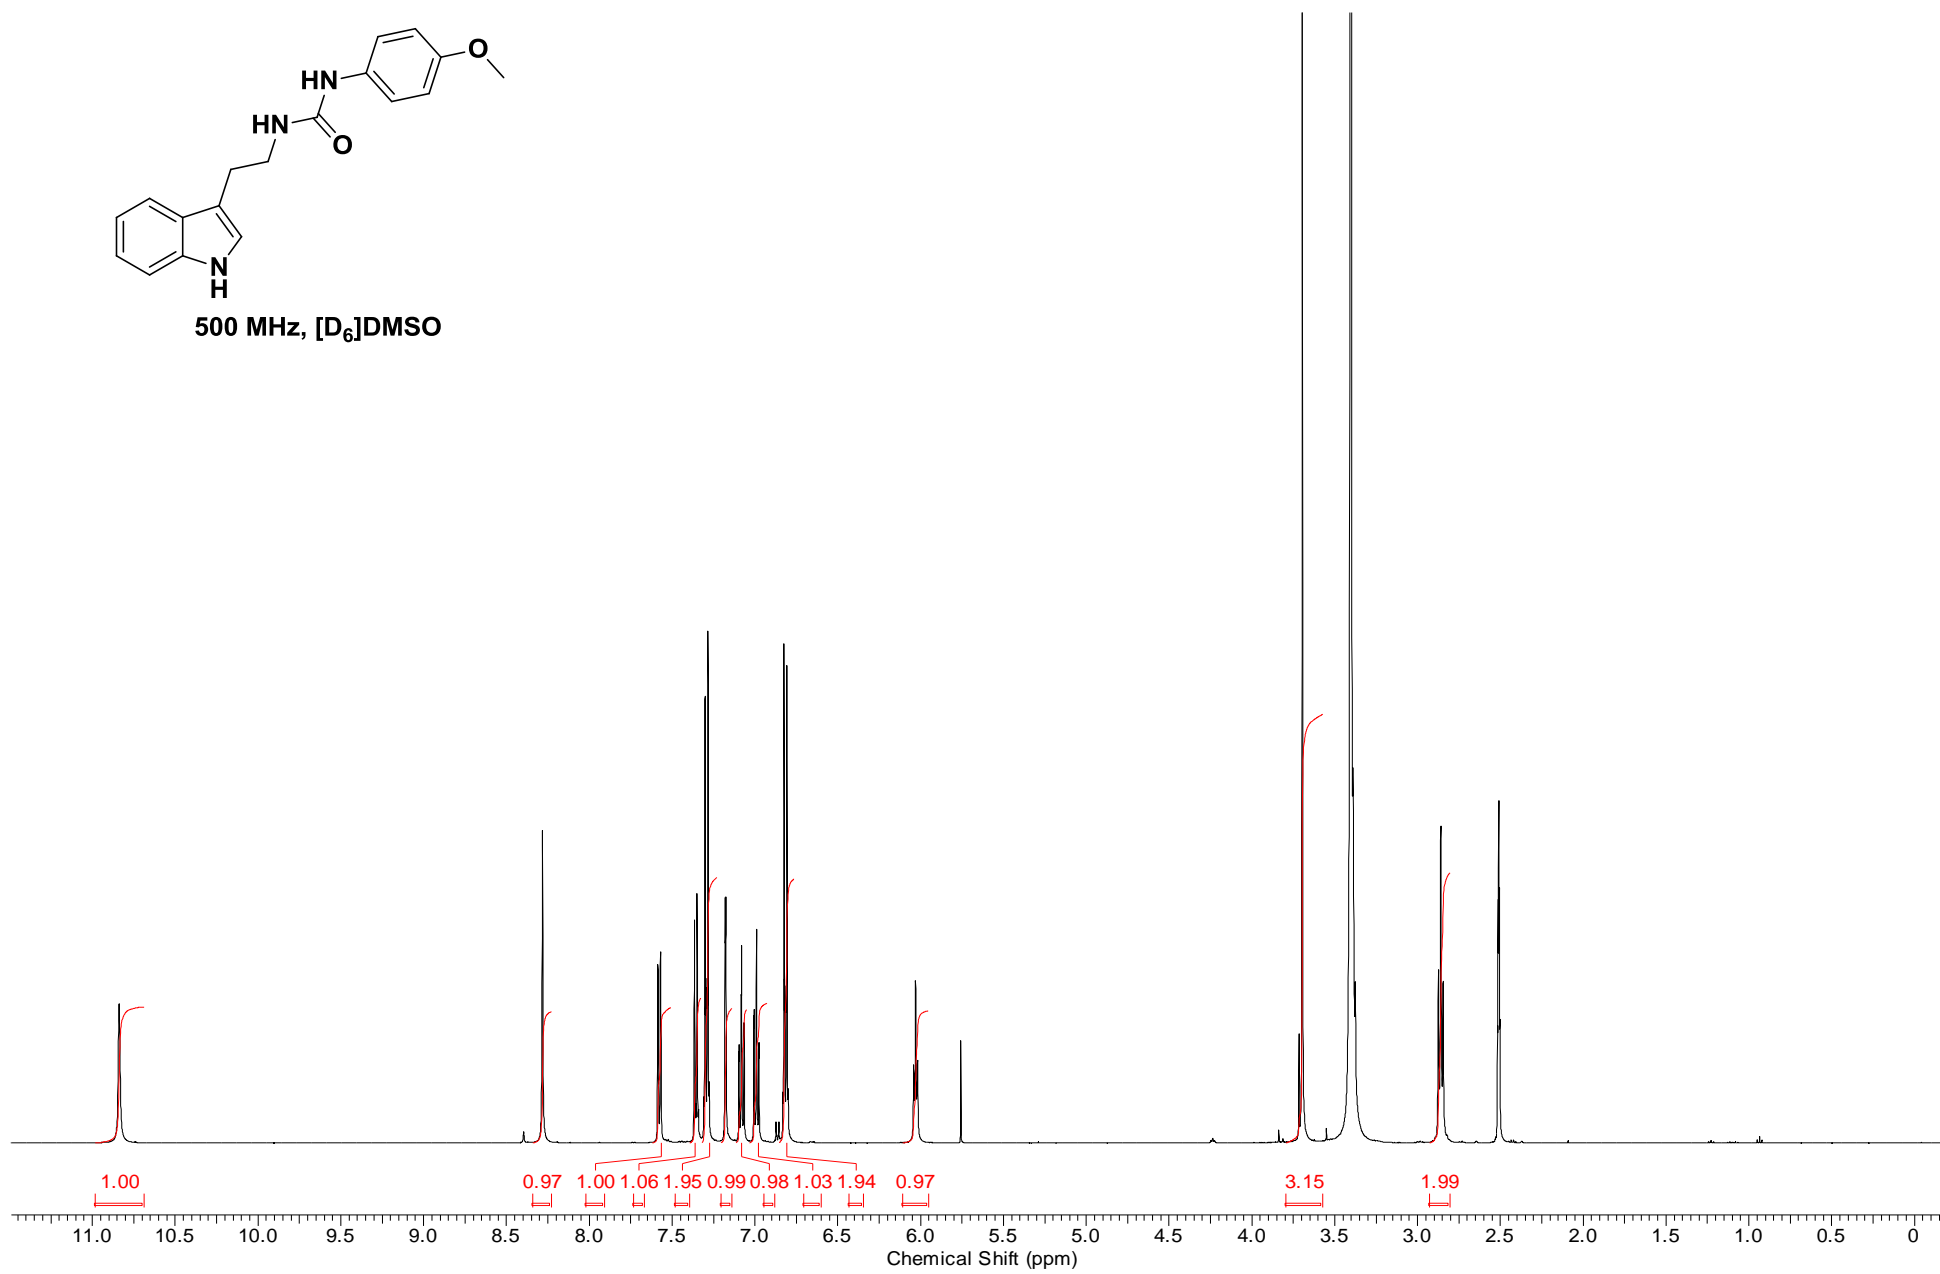

### 3.12.2 $^{13}\text{C}$ NMR of compound 5n

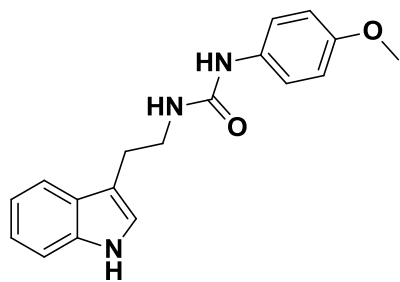

125 MHz,  $[\text{D}_6]\text{DMSO}$

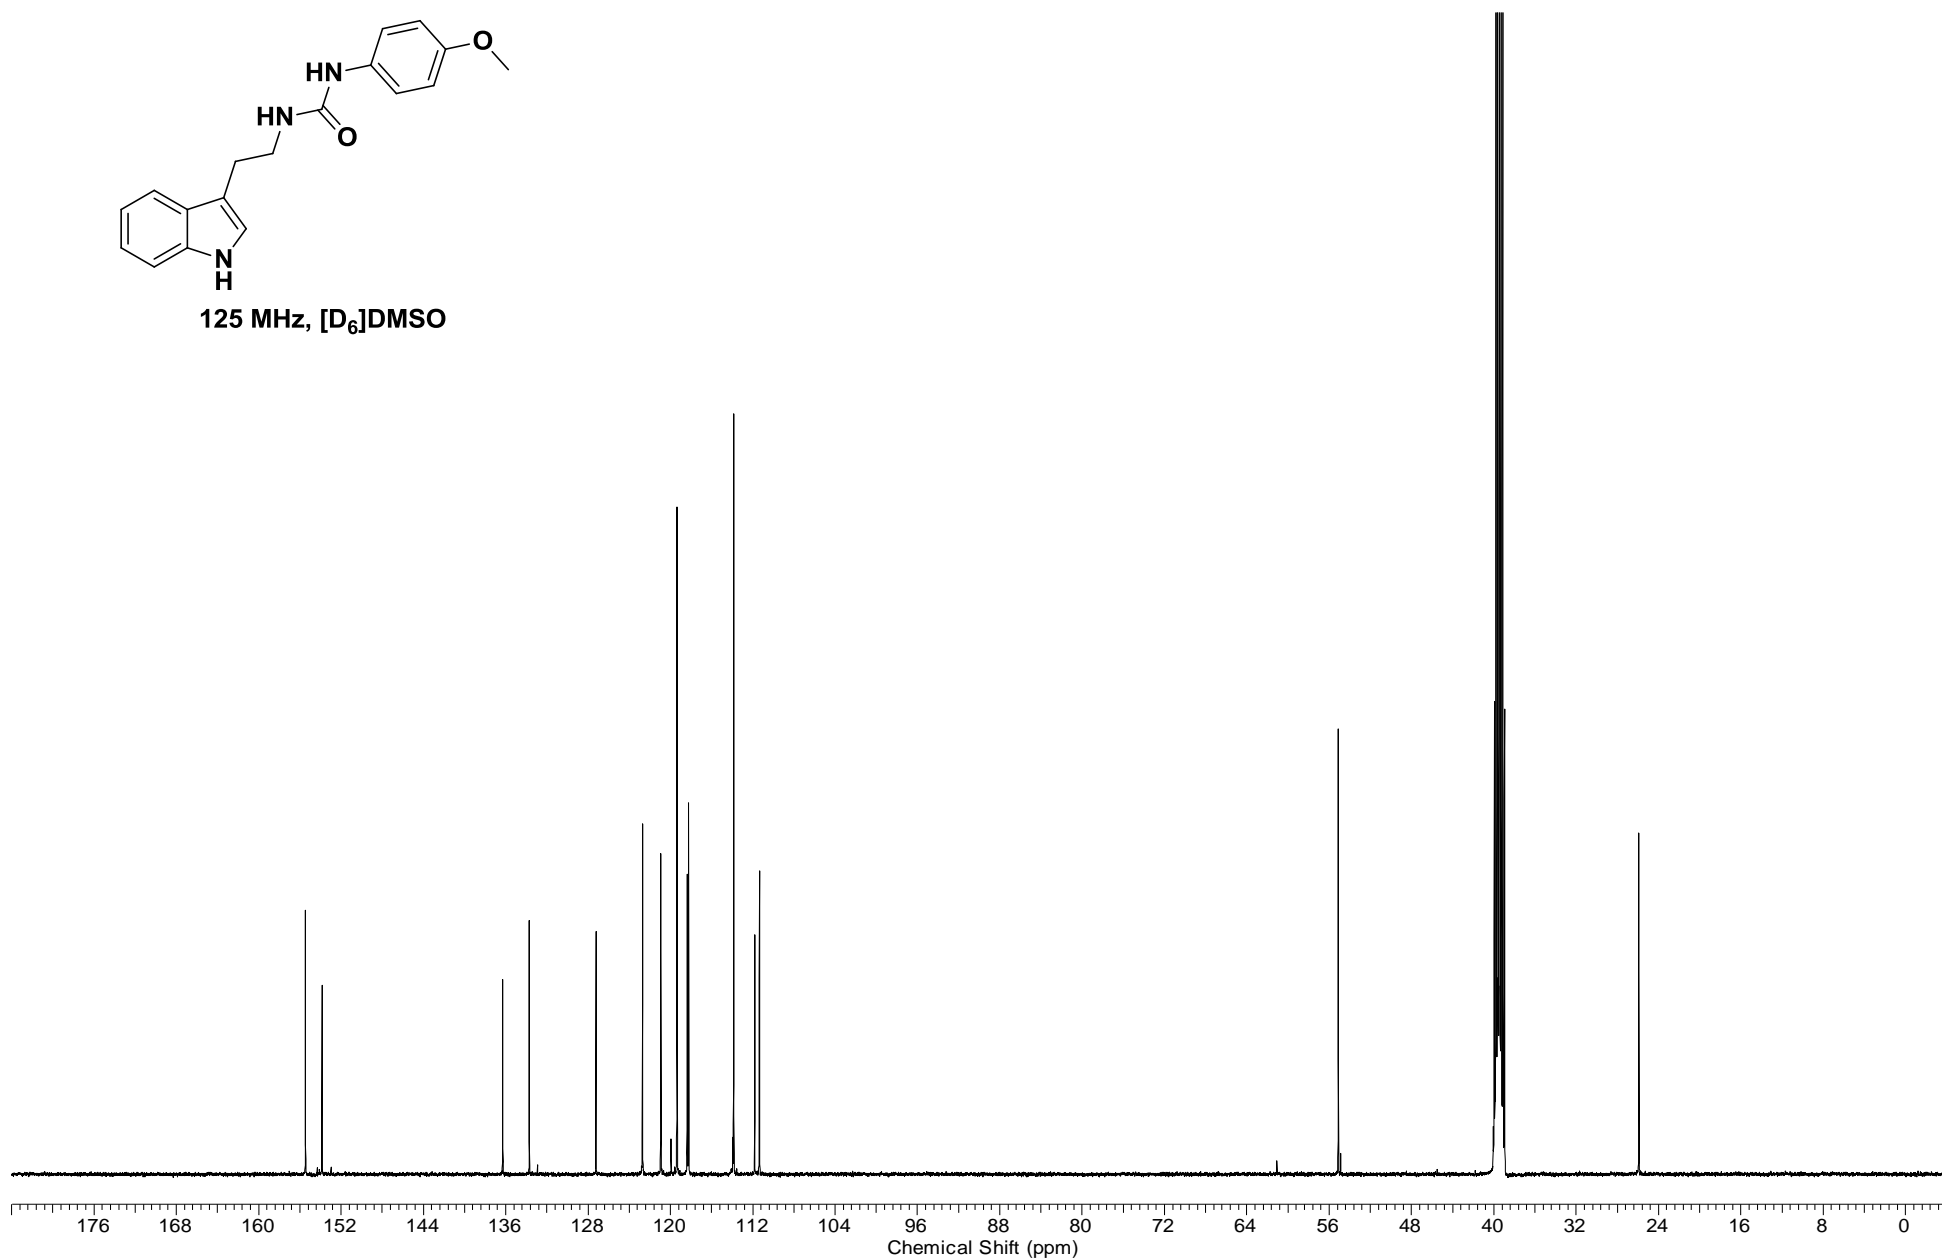



### 3.13.1 $^1\text{H}$ NMR of compound 5o

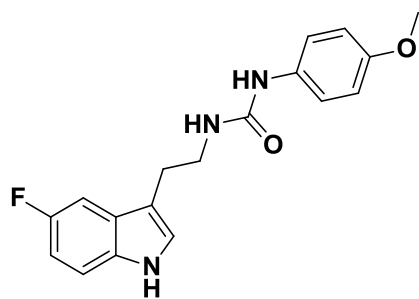

500 MHz,  $[\text{D}_6]\text{DMSO}$

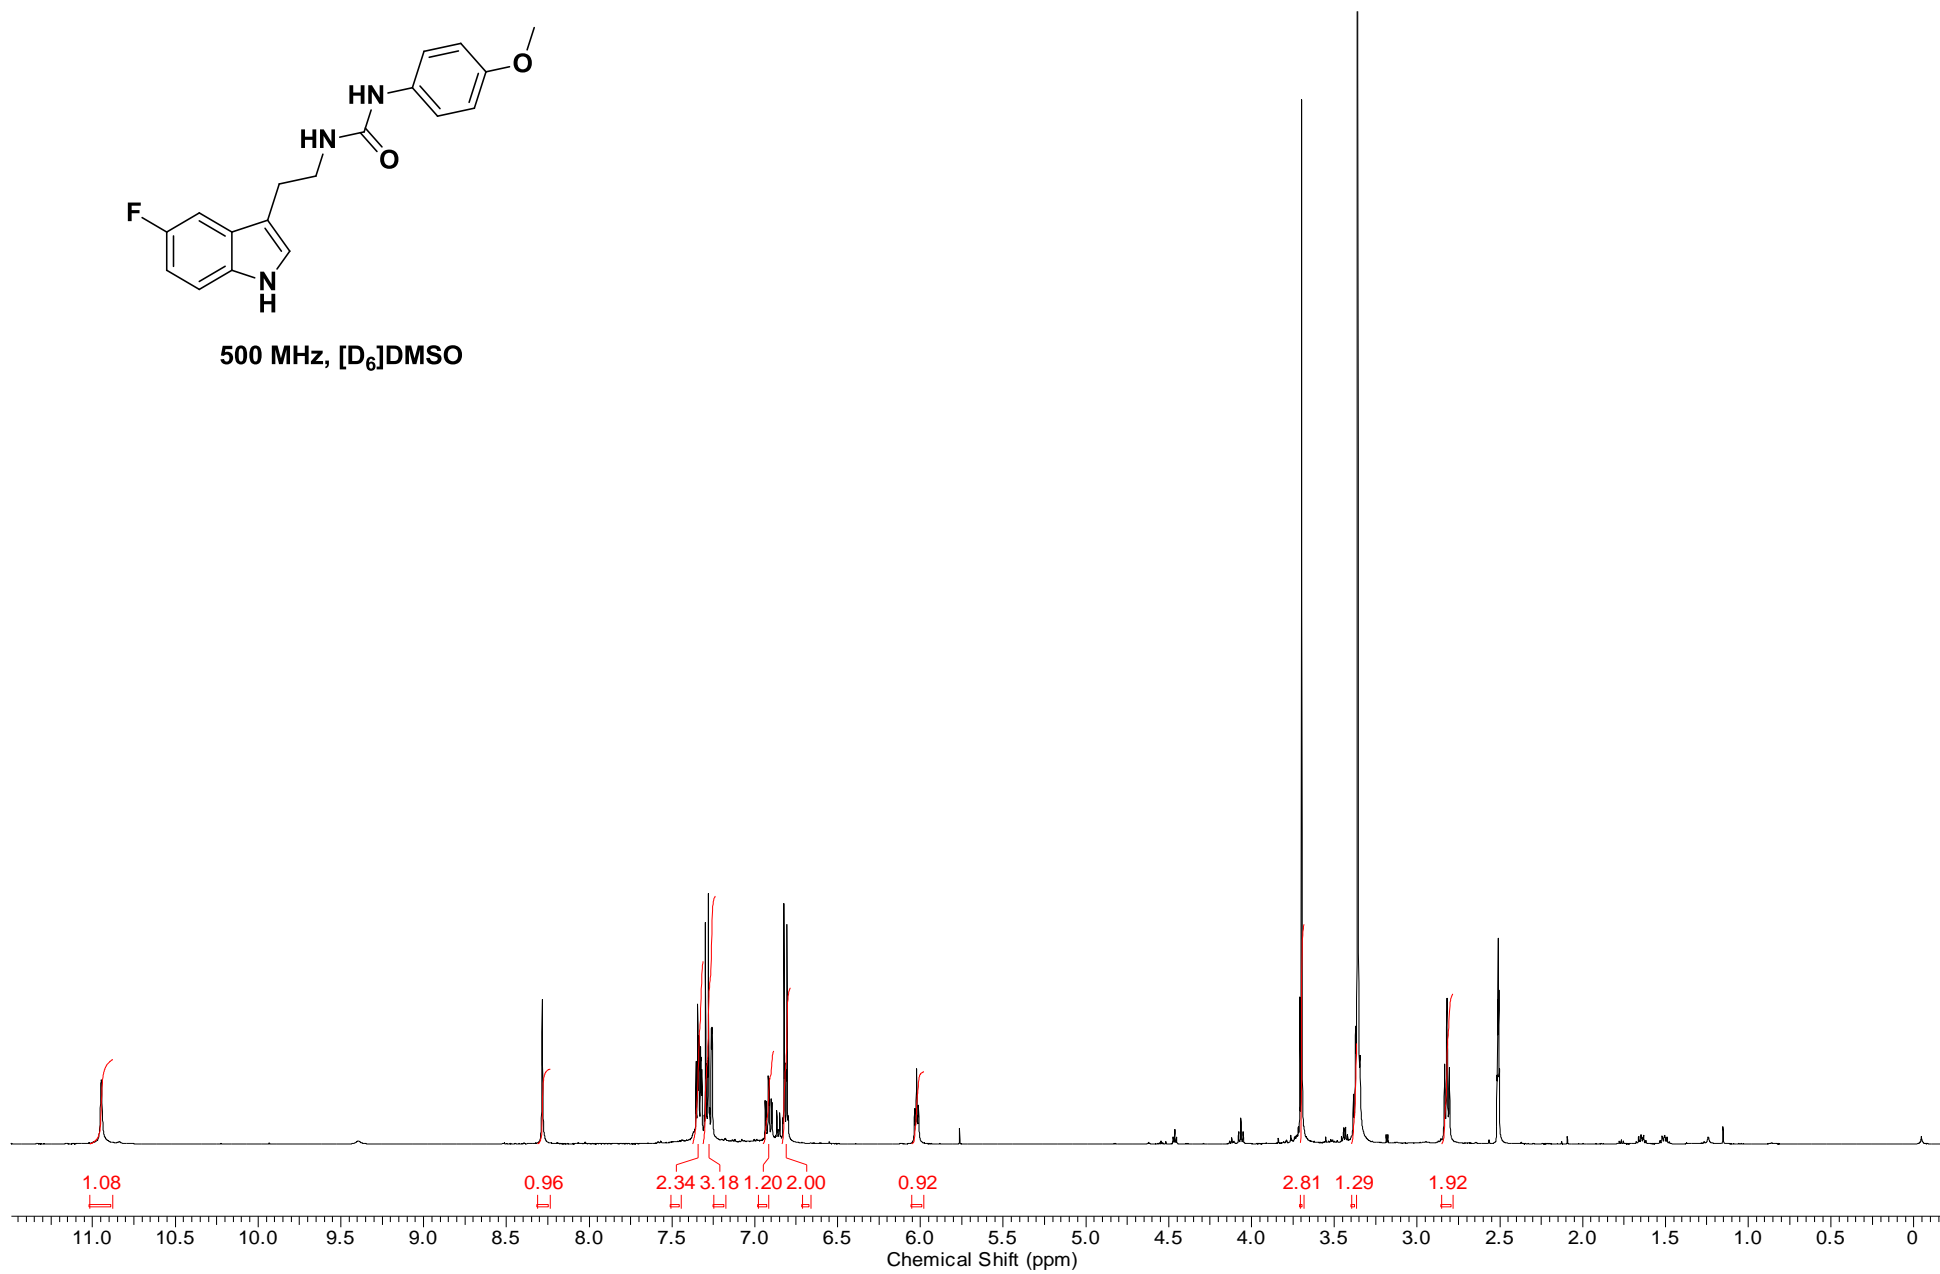

### 3.13.2 $^{13}\text{C}$ NMR of compound 5o

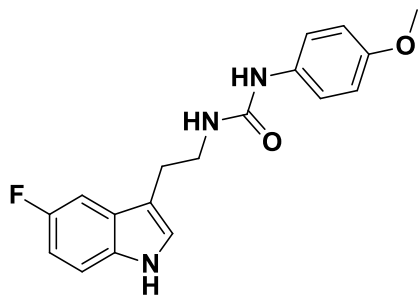

125 MHz,  $[\text{D}_6]\text{DMSO}$

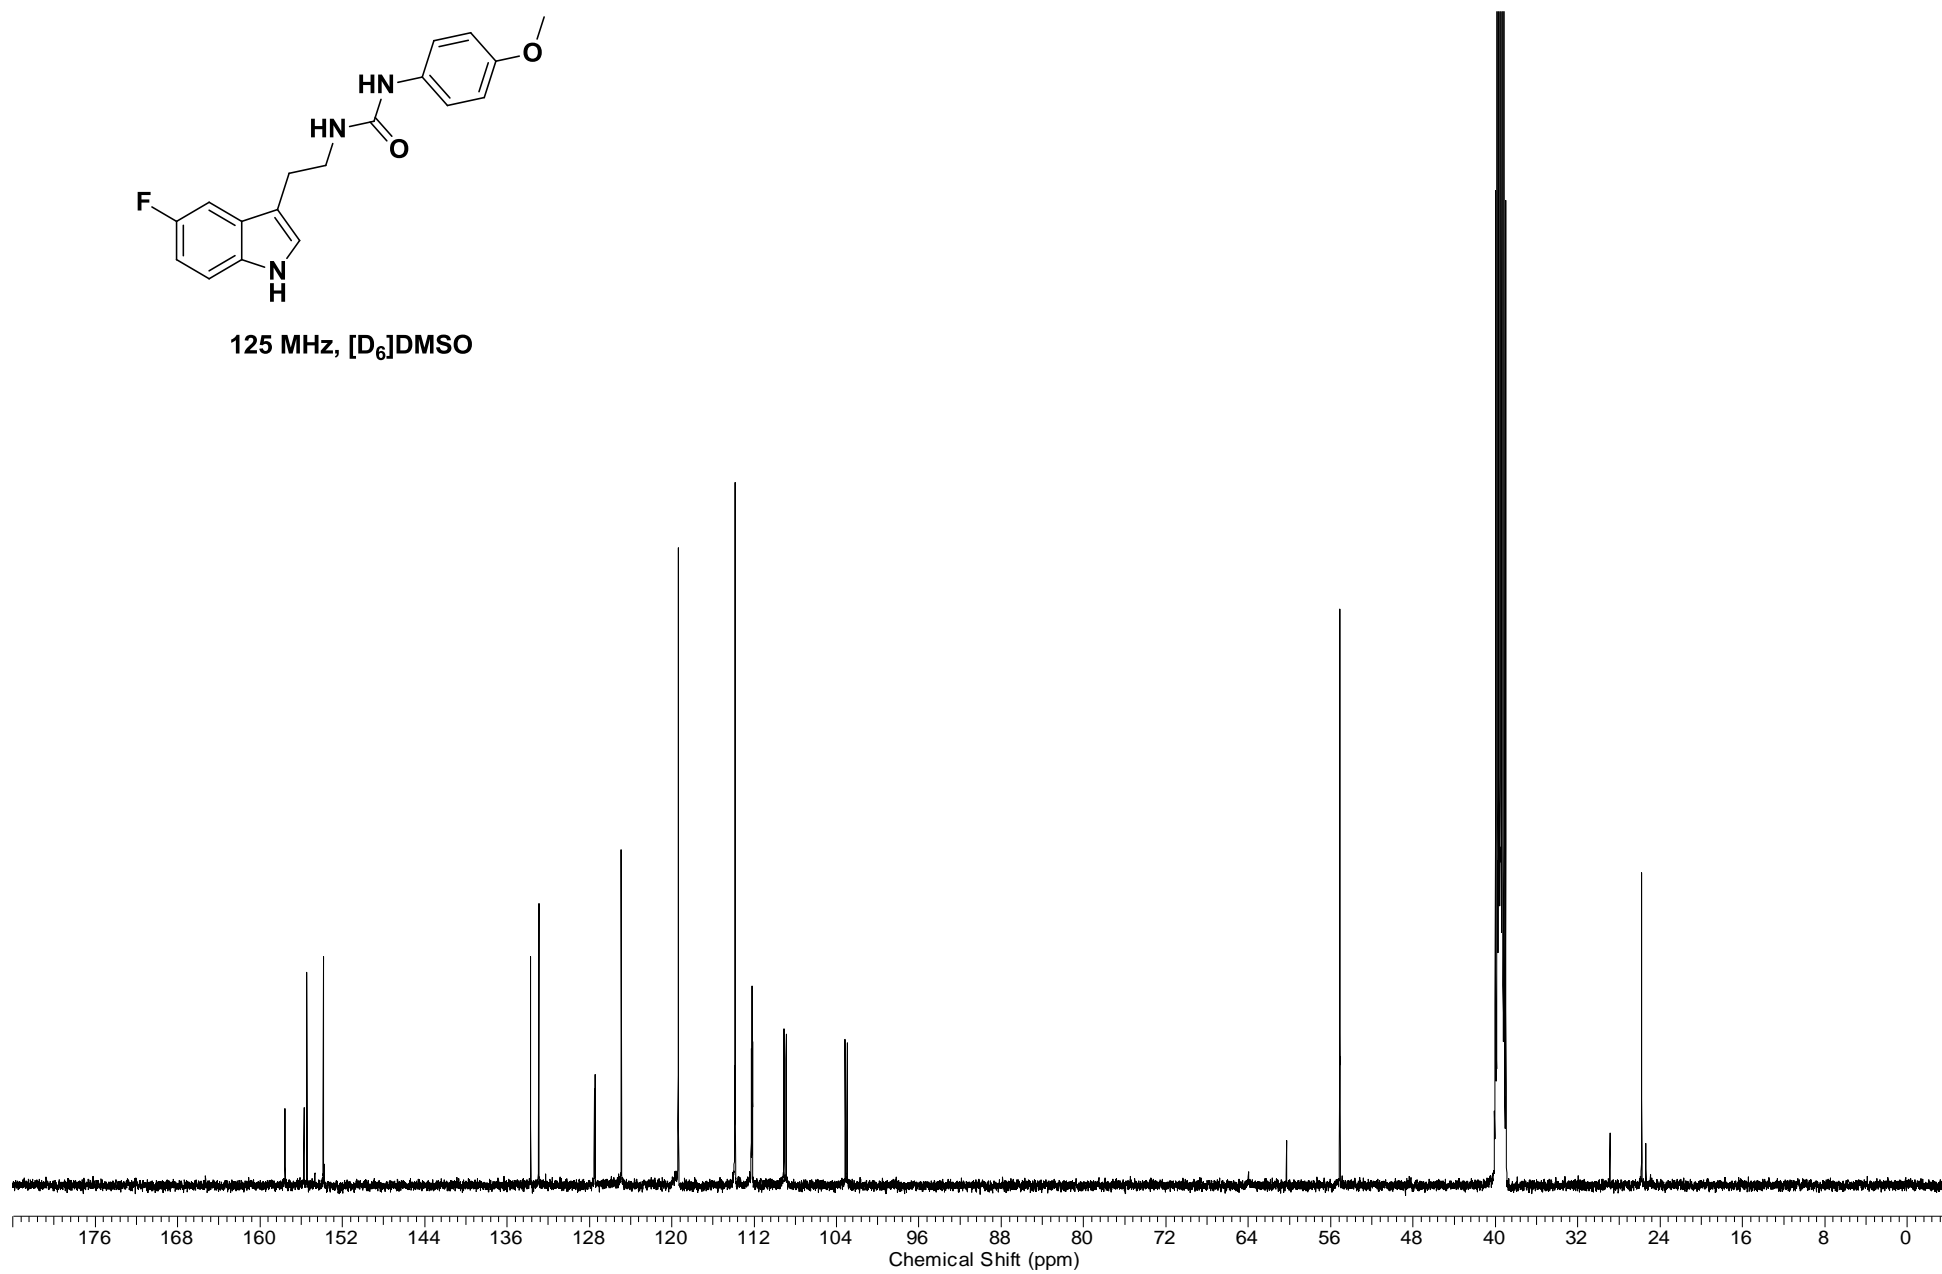

### 3.14.1 $^1\text{H}$ NMR of compound 5p

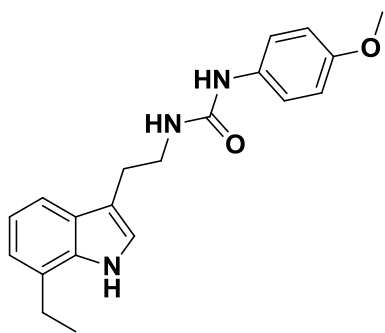

500 MHz,  $[\text{D}_6]$ DMSO

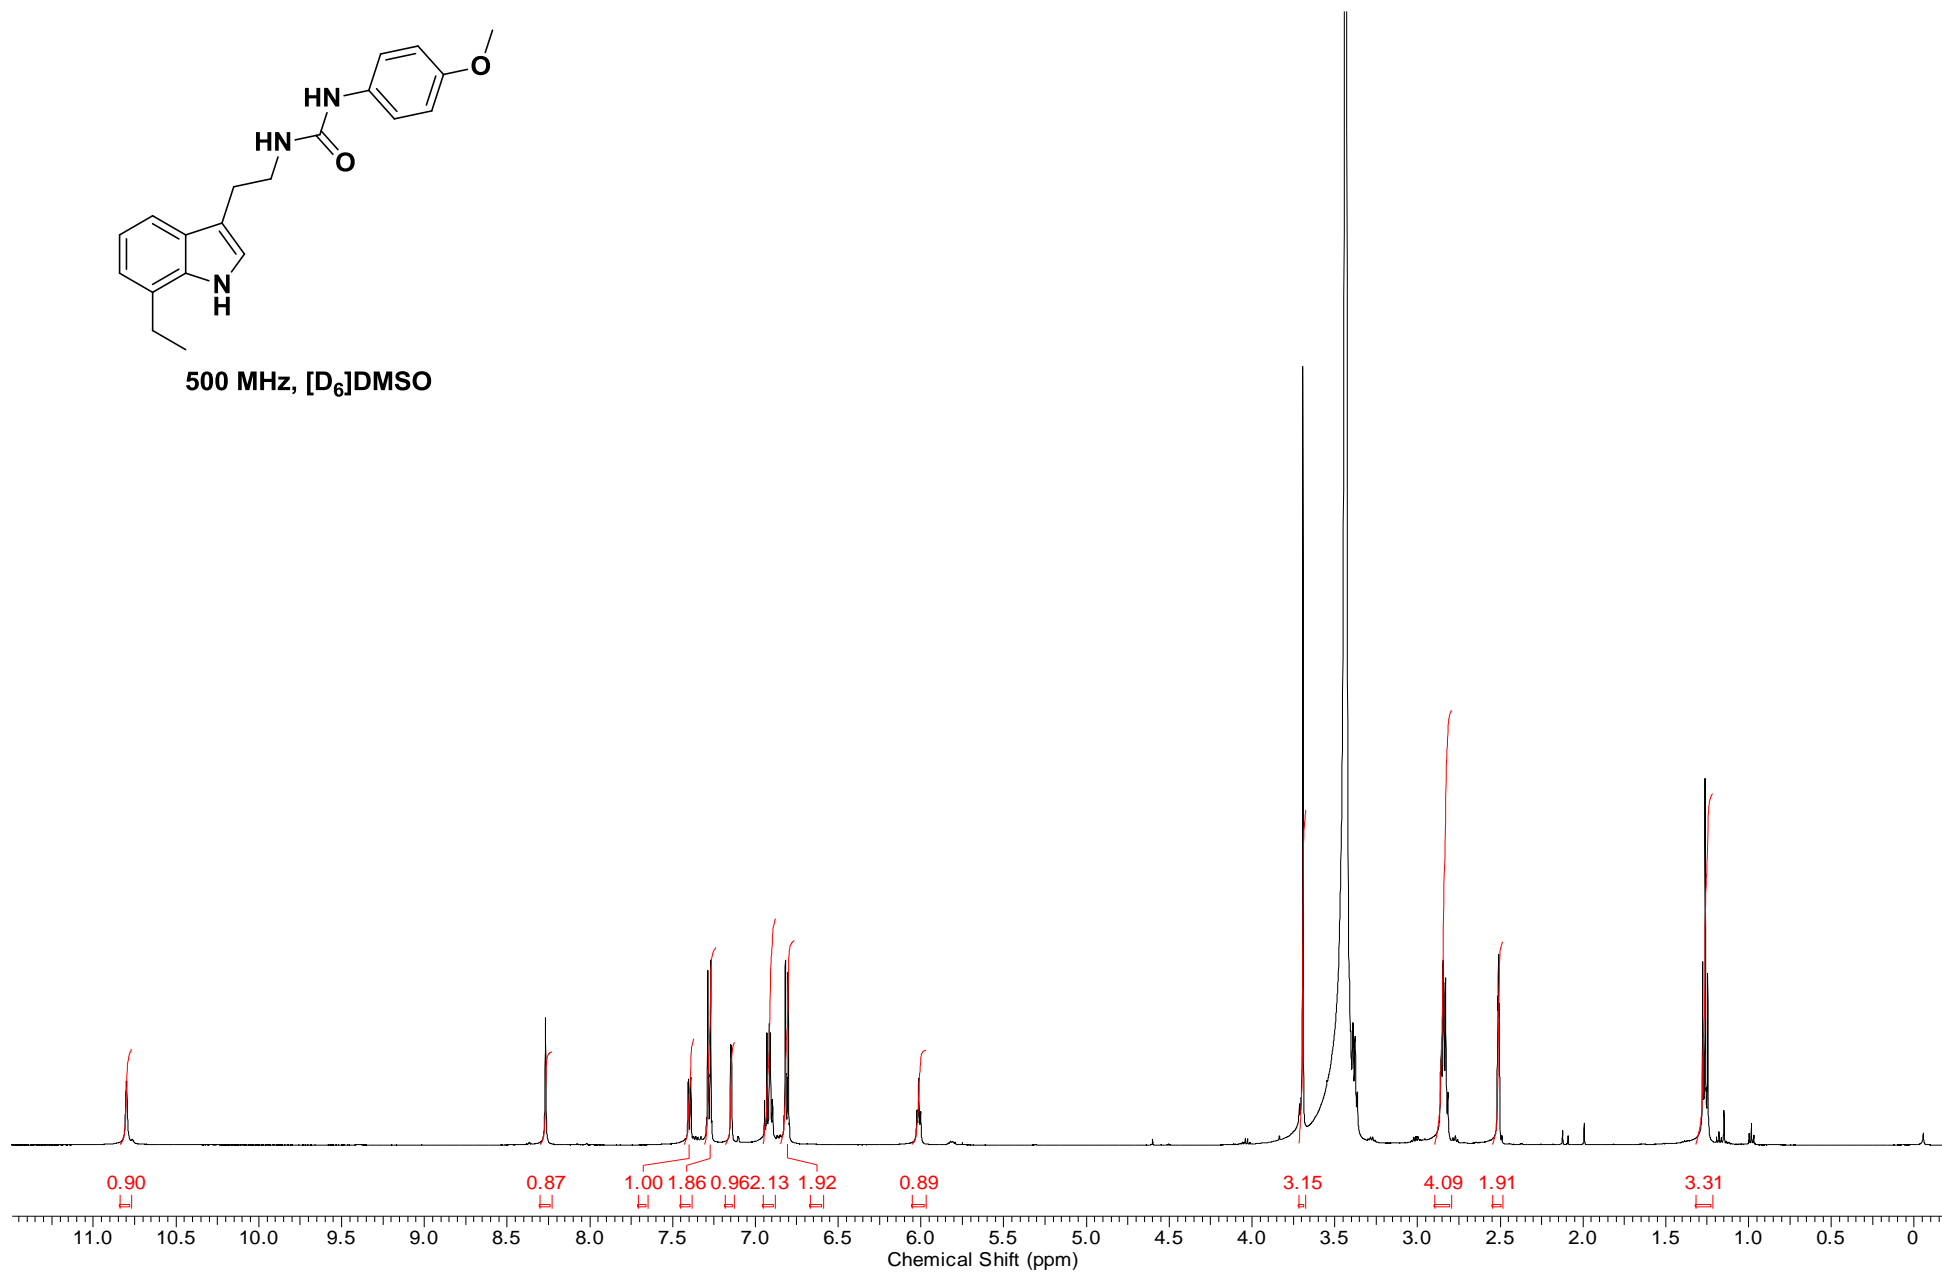

### 3.14.2 $^{13}\text{C}$ NMR of compound 5p

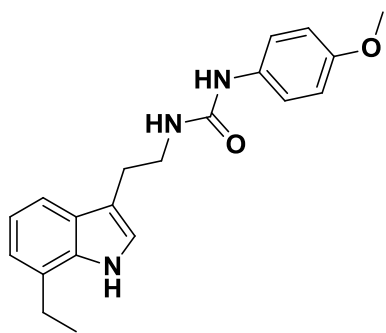

125 MHz,  $[\text{D}_6]\text{DMSO}$

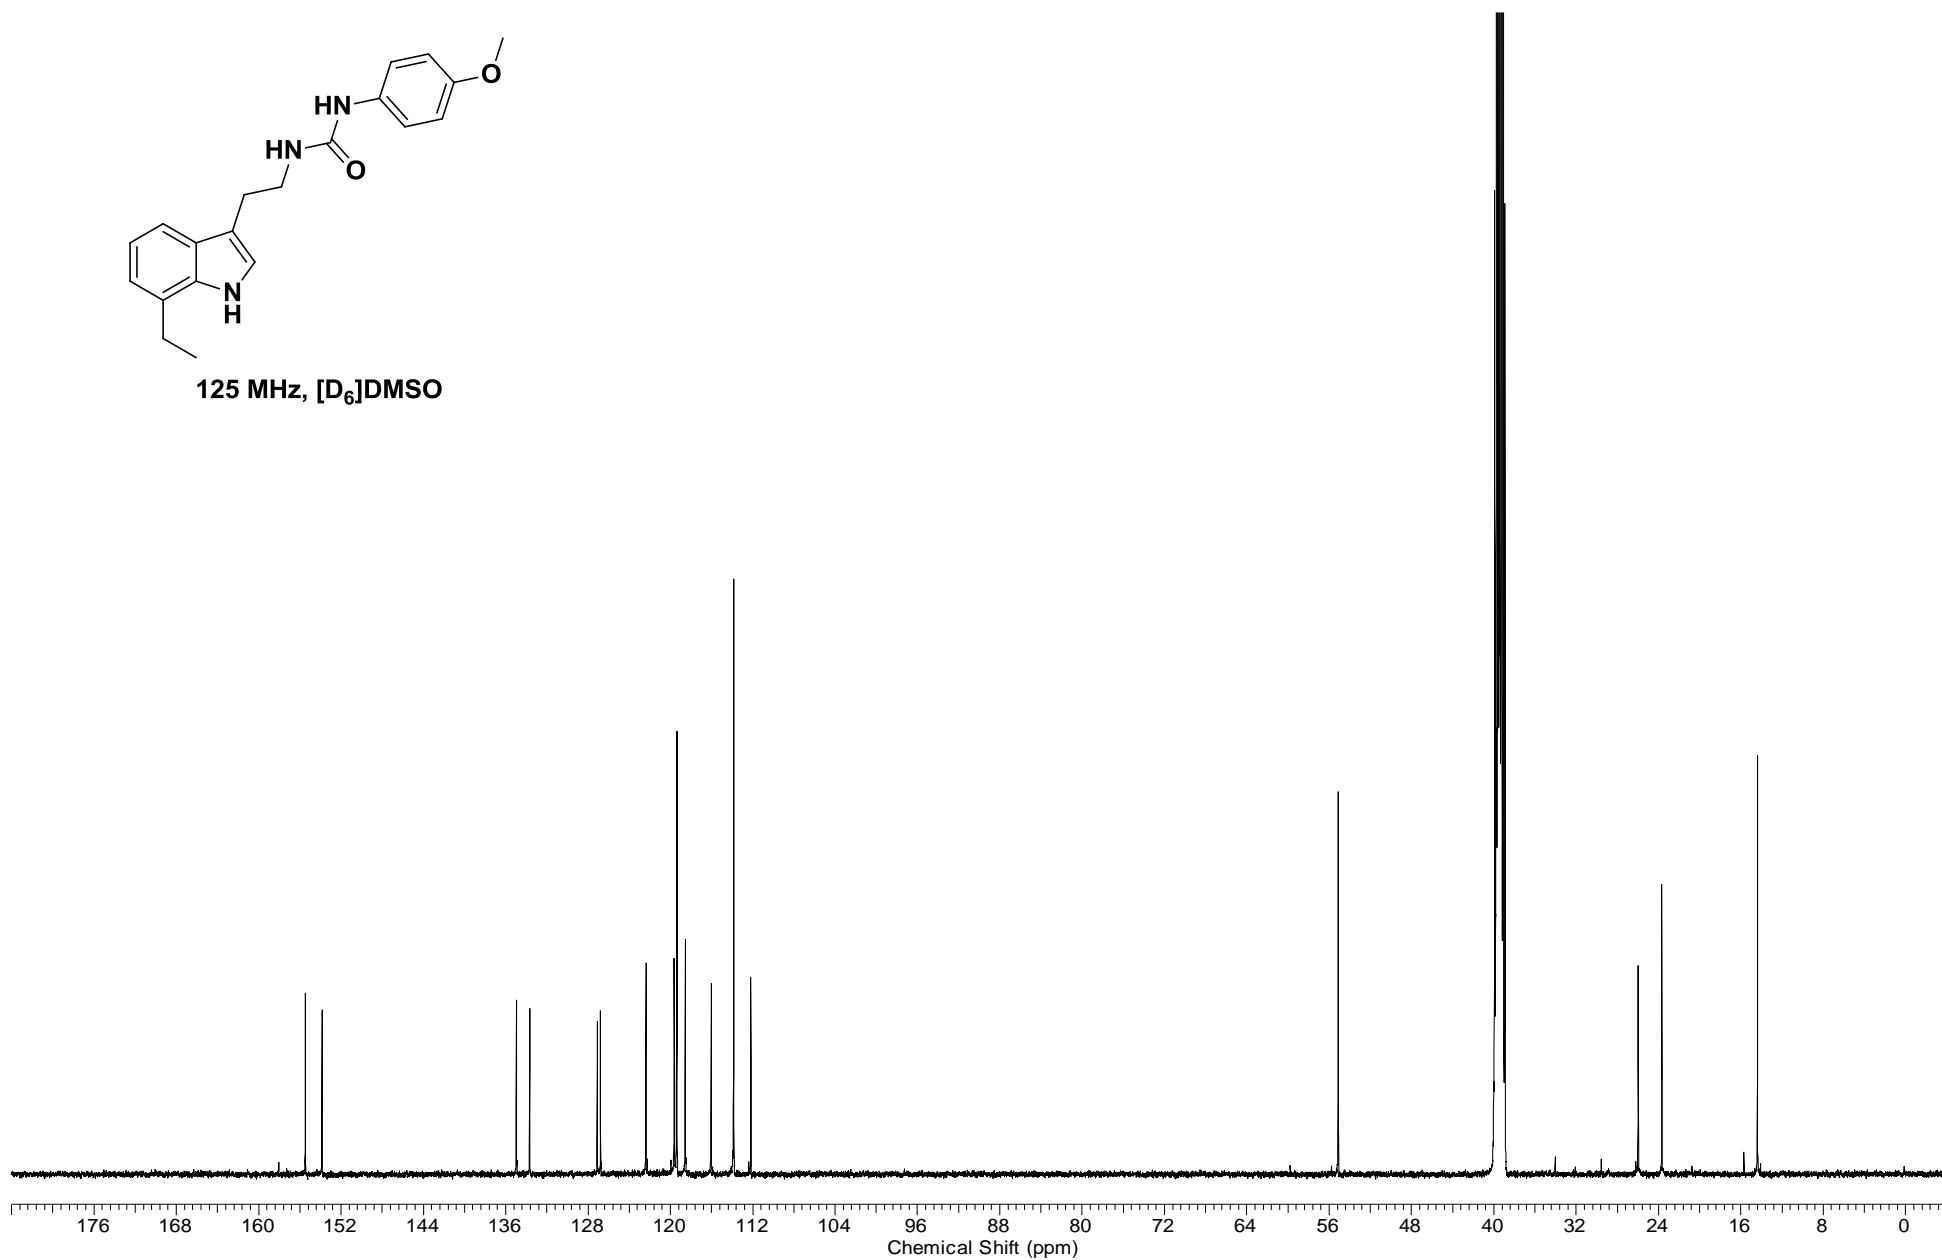

### 4.1.1 $^1\text{H}$ NMR of compound 9a

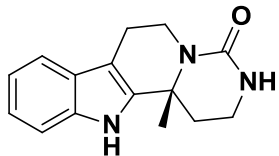

500 MHz,  $[\text{D}_6]\text{DMSO}$

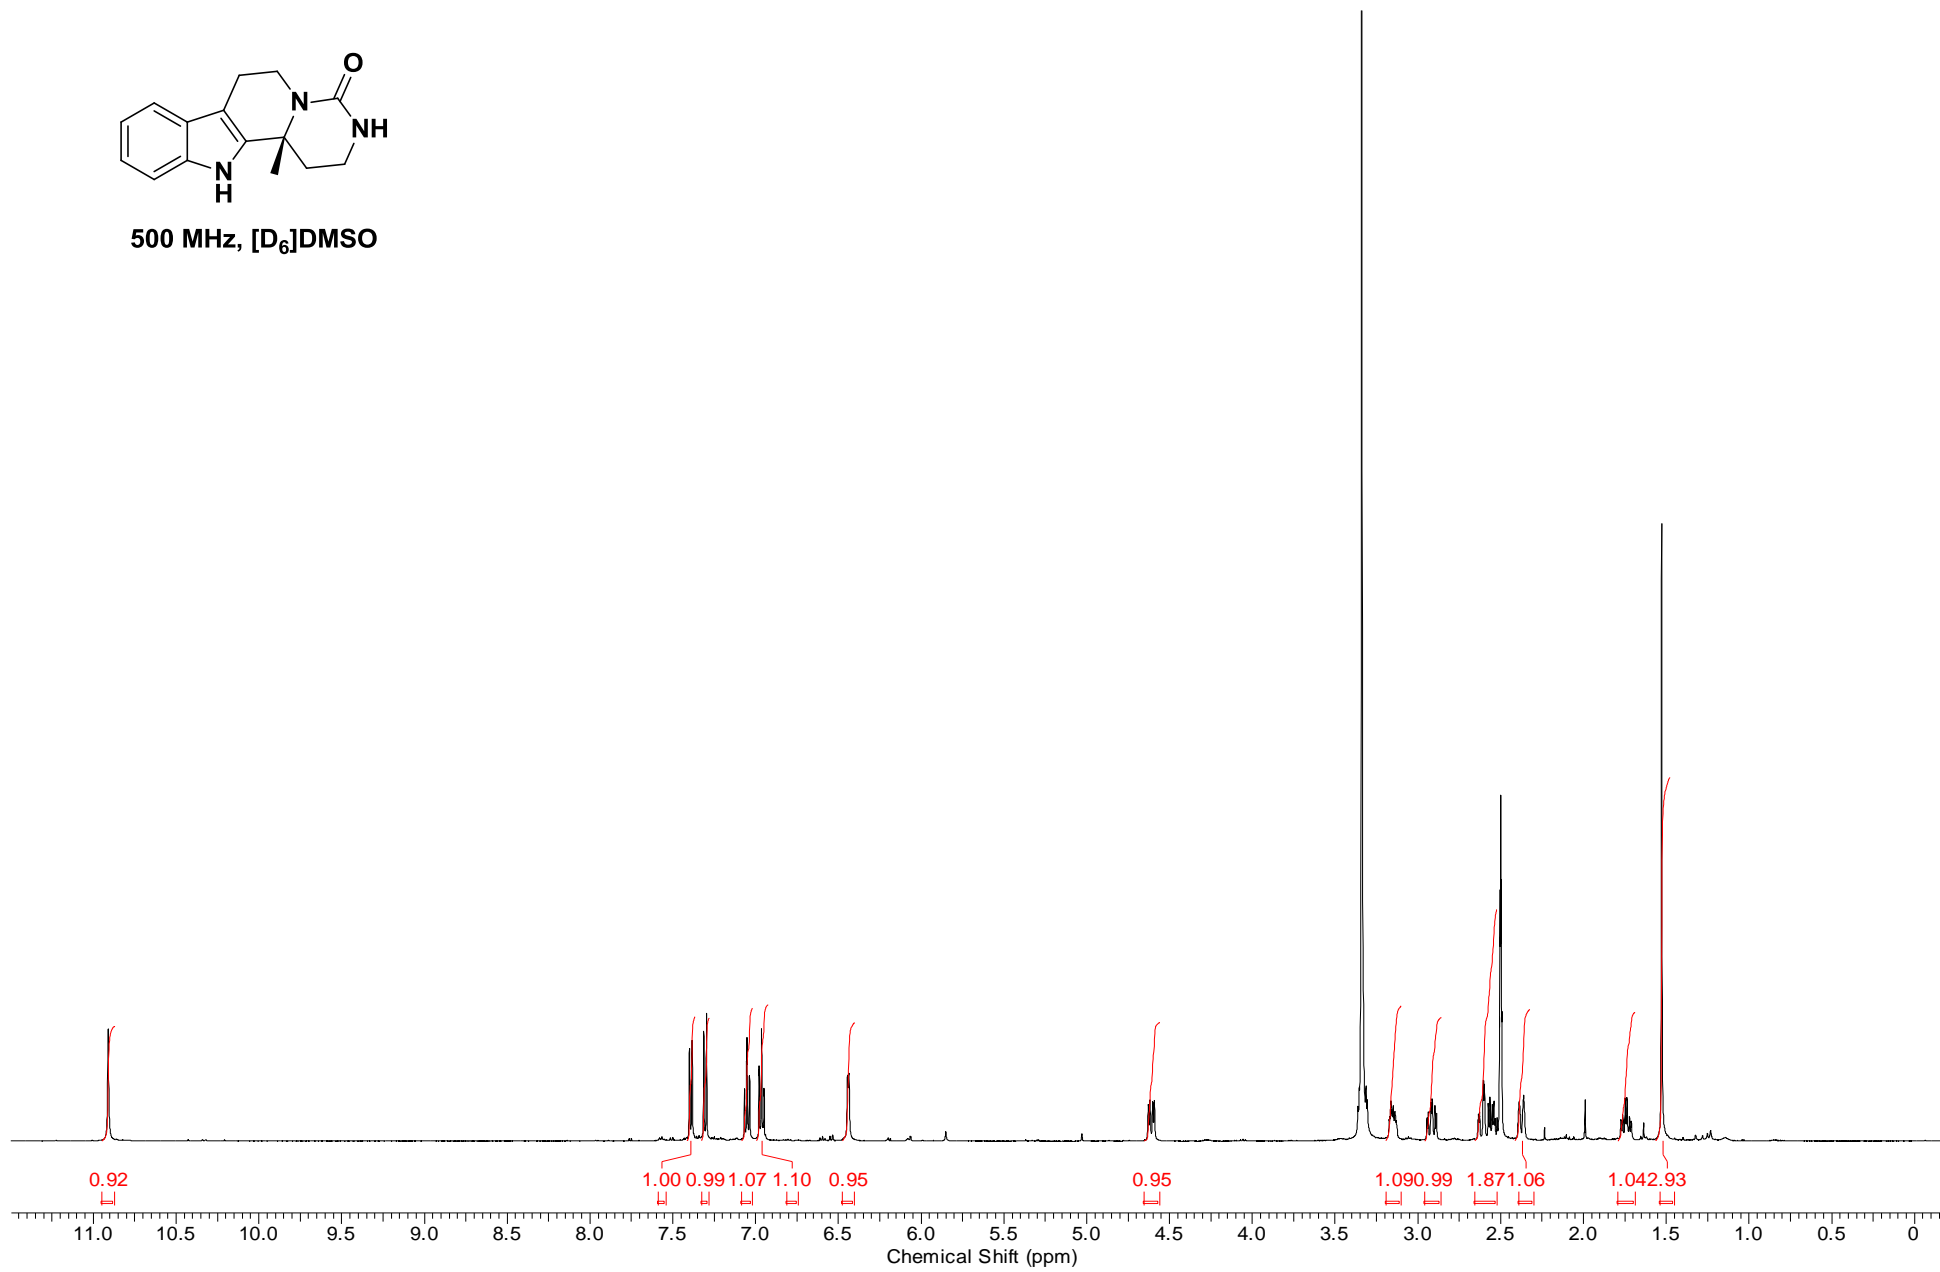

#### 4.1.2 $^{13}\text{C}$ NMR of compound 9a

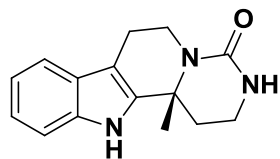

125 MHz,  $[\text{D}_6]\text{DMSO}$

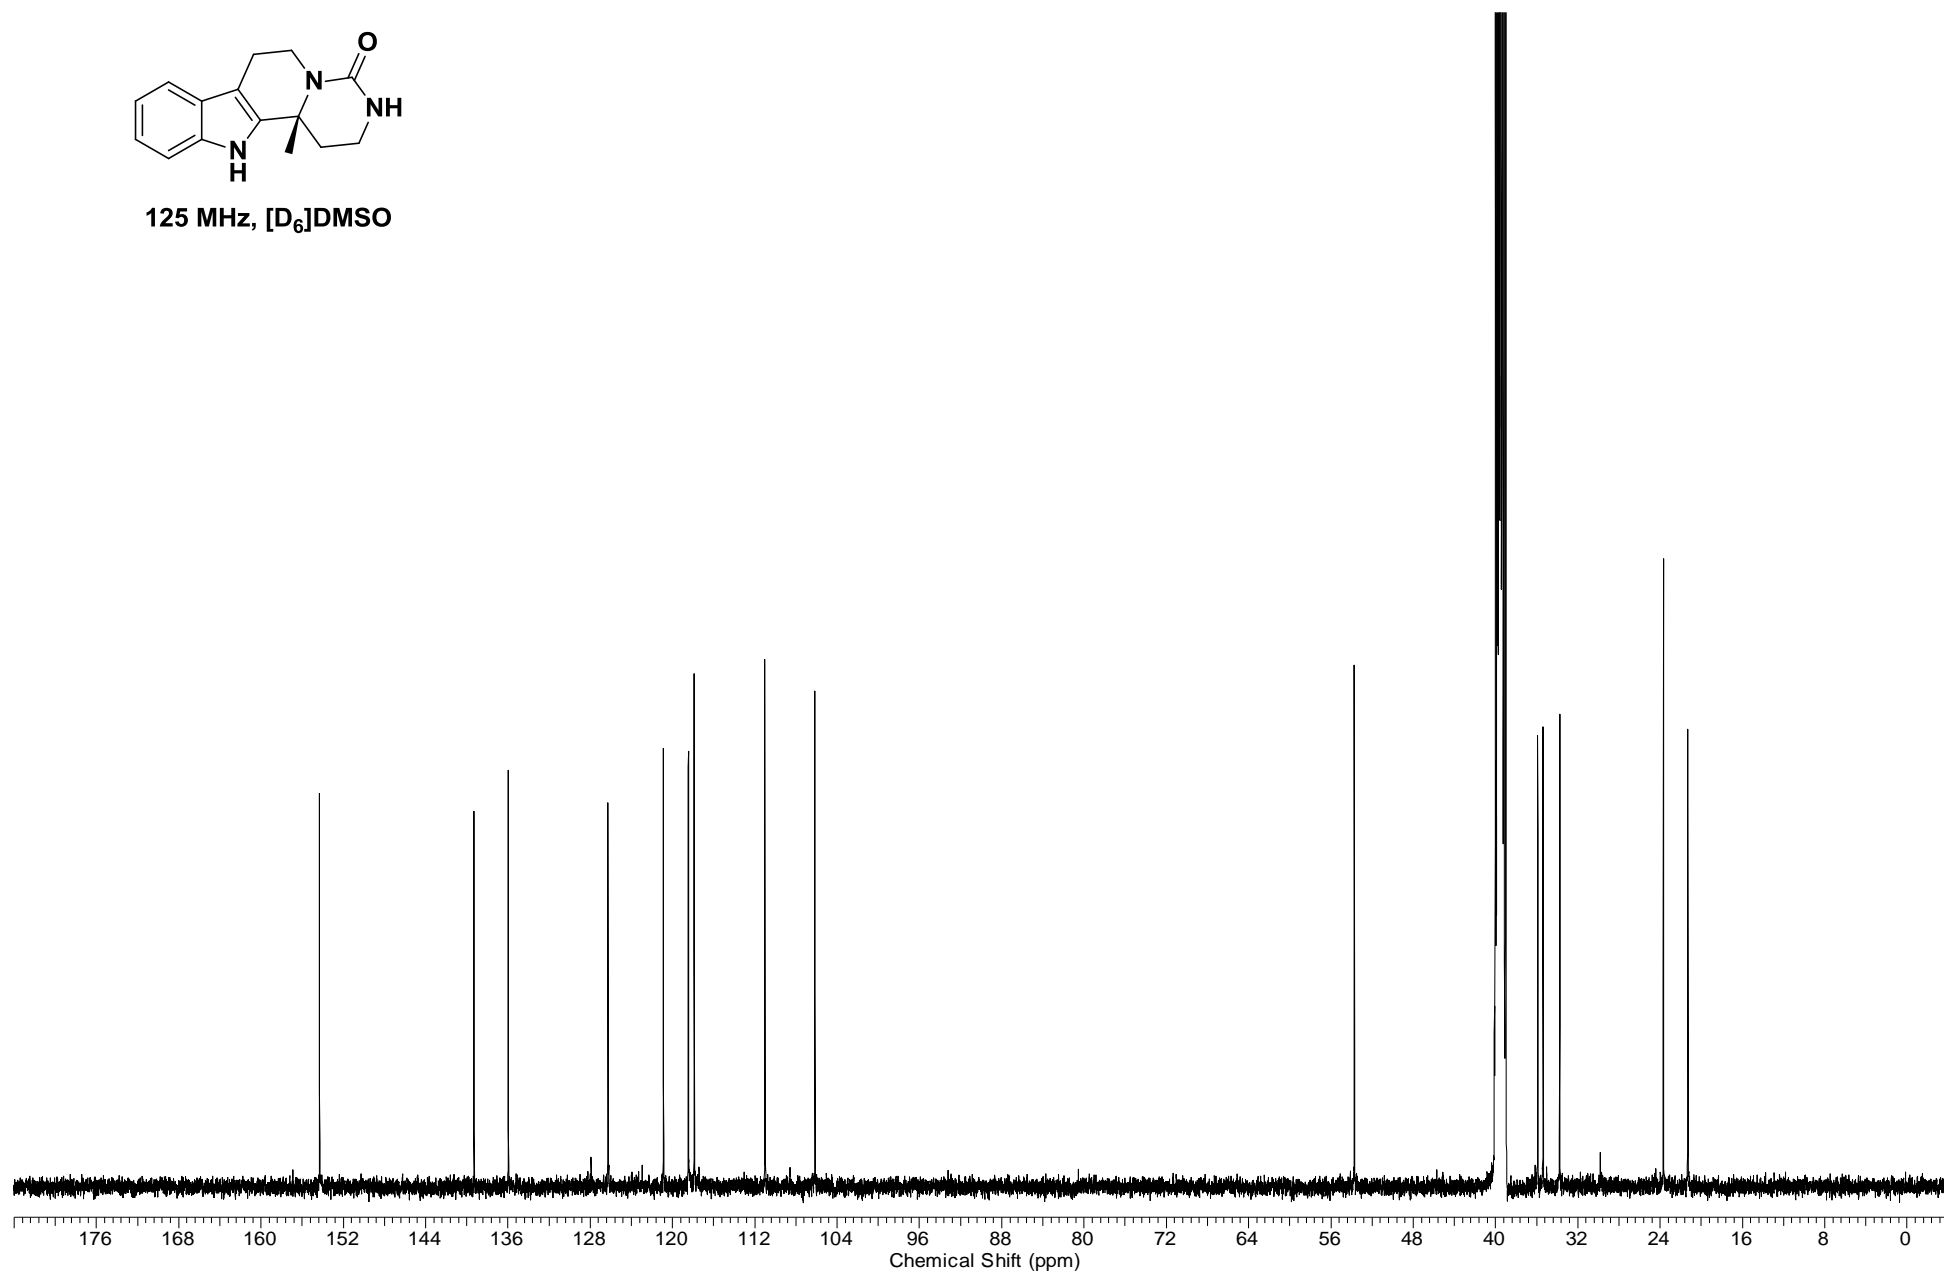

### 4.2.1 $^1\text{H}$ NMR of compound 9b

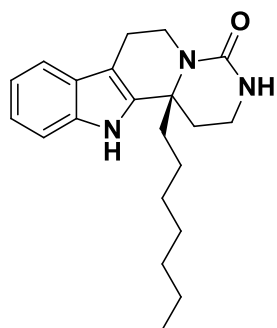

500 MHz,  $[\text{D}_6]\text{DMSO}$

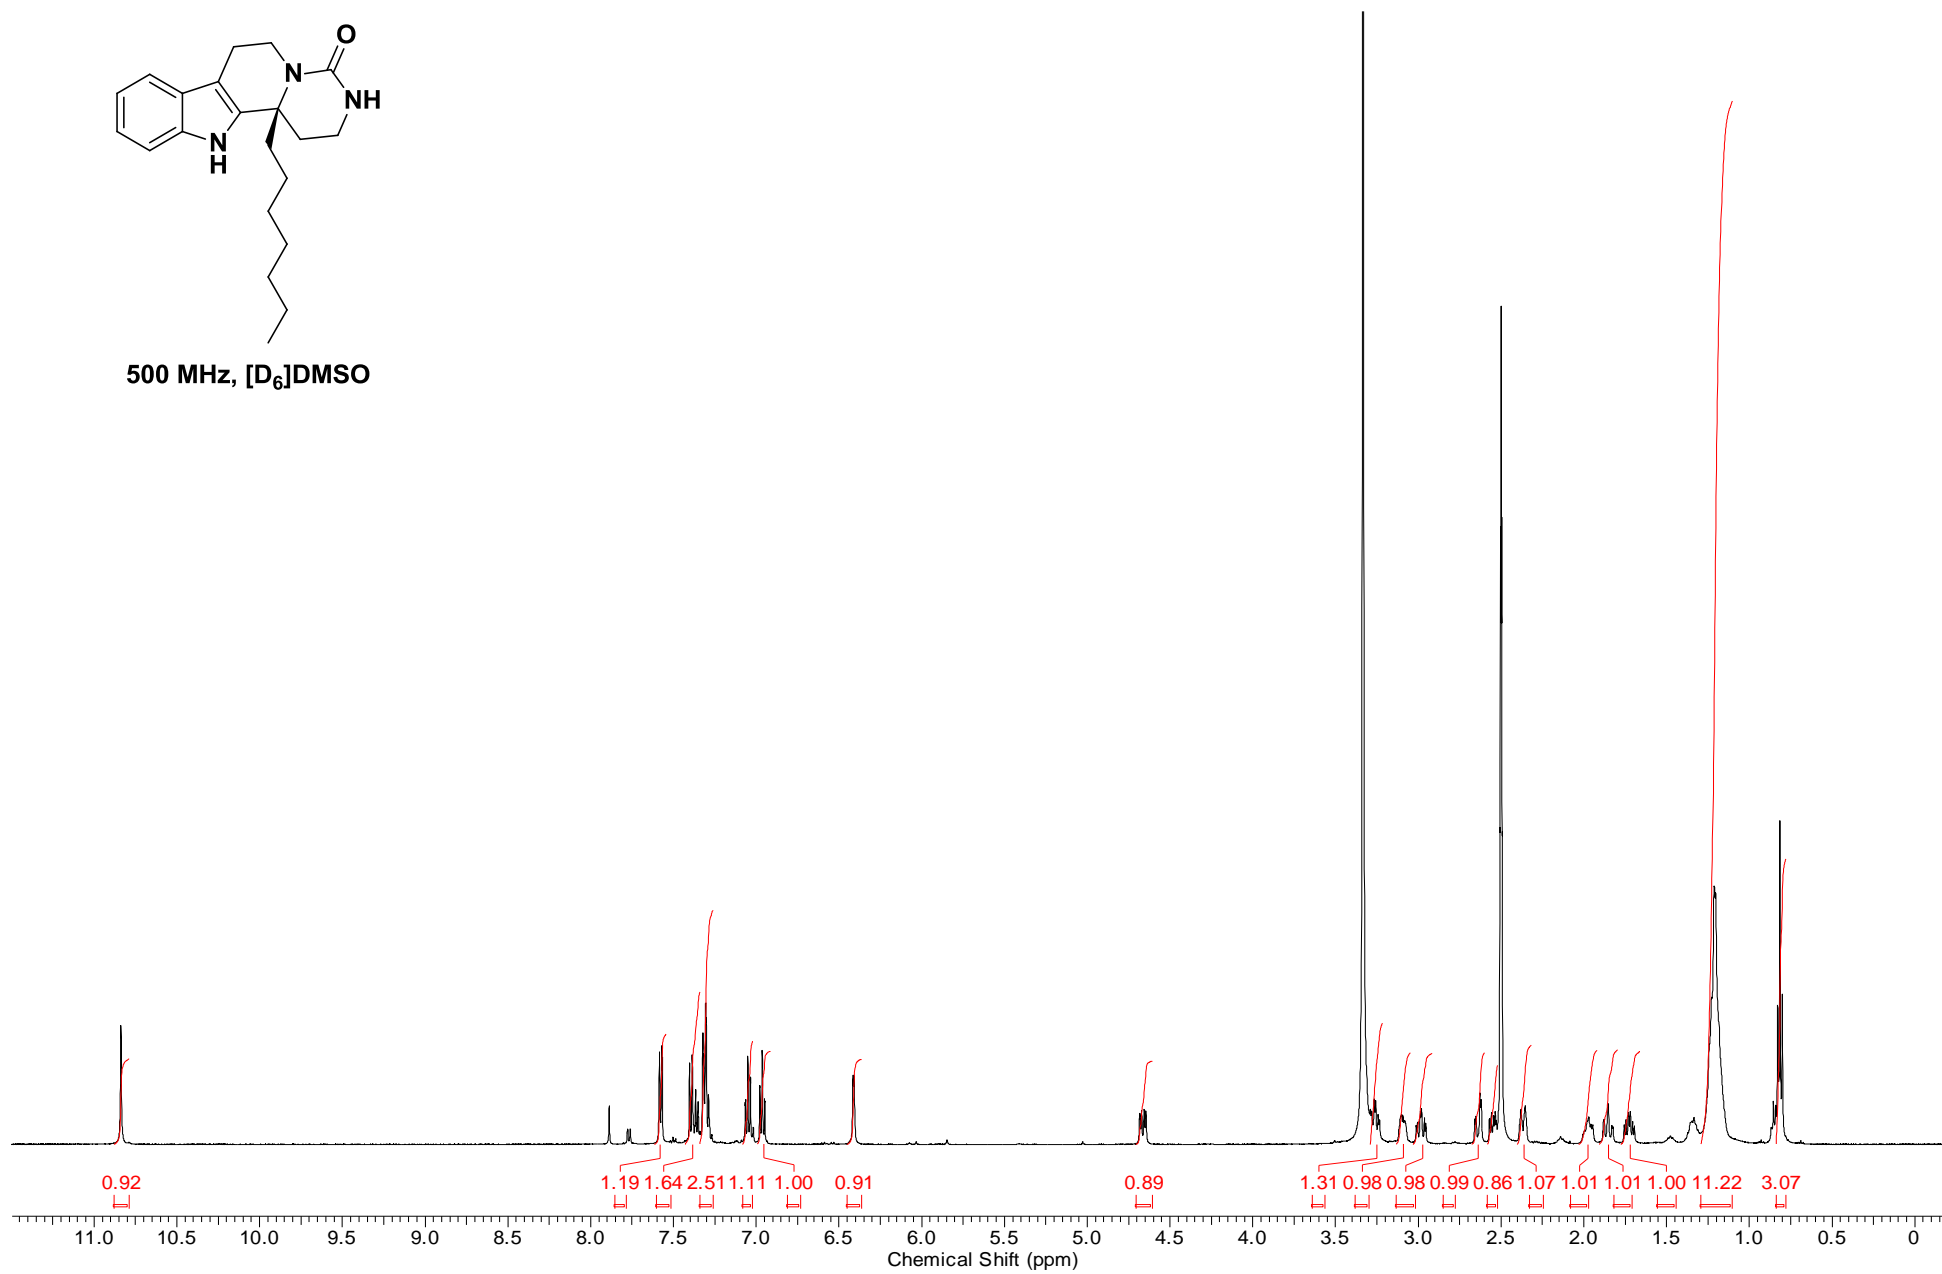

### 4.2.2 $^{13}\text{C}$ NMR of compound 9b

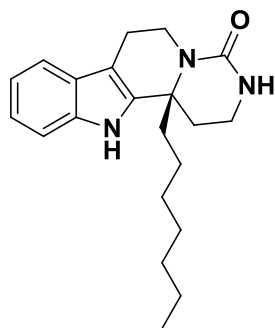

125 MHz,  $[\text{D}_6]\text{DMSO}$

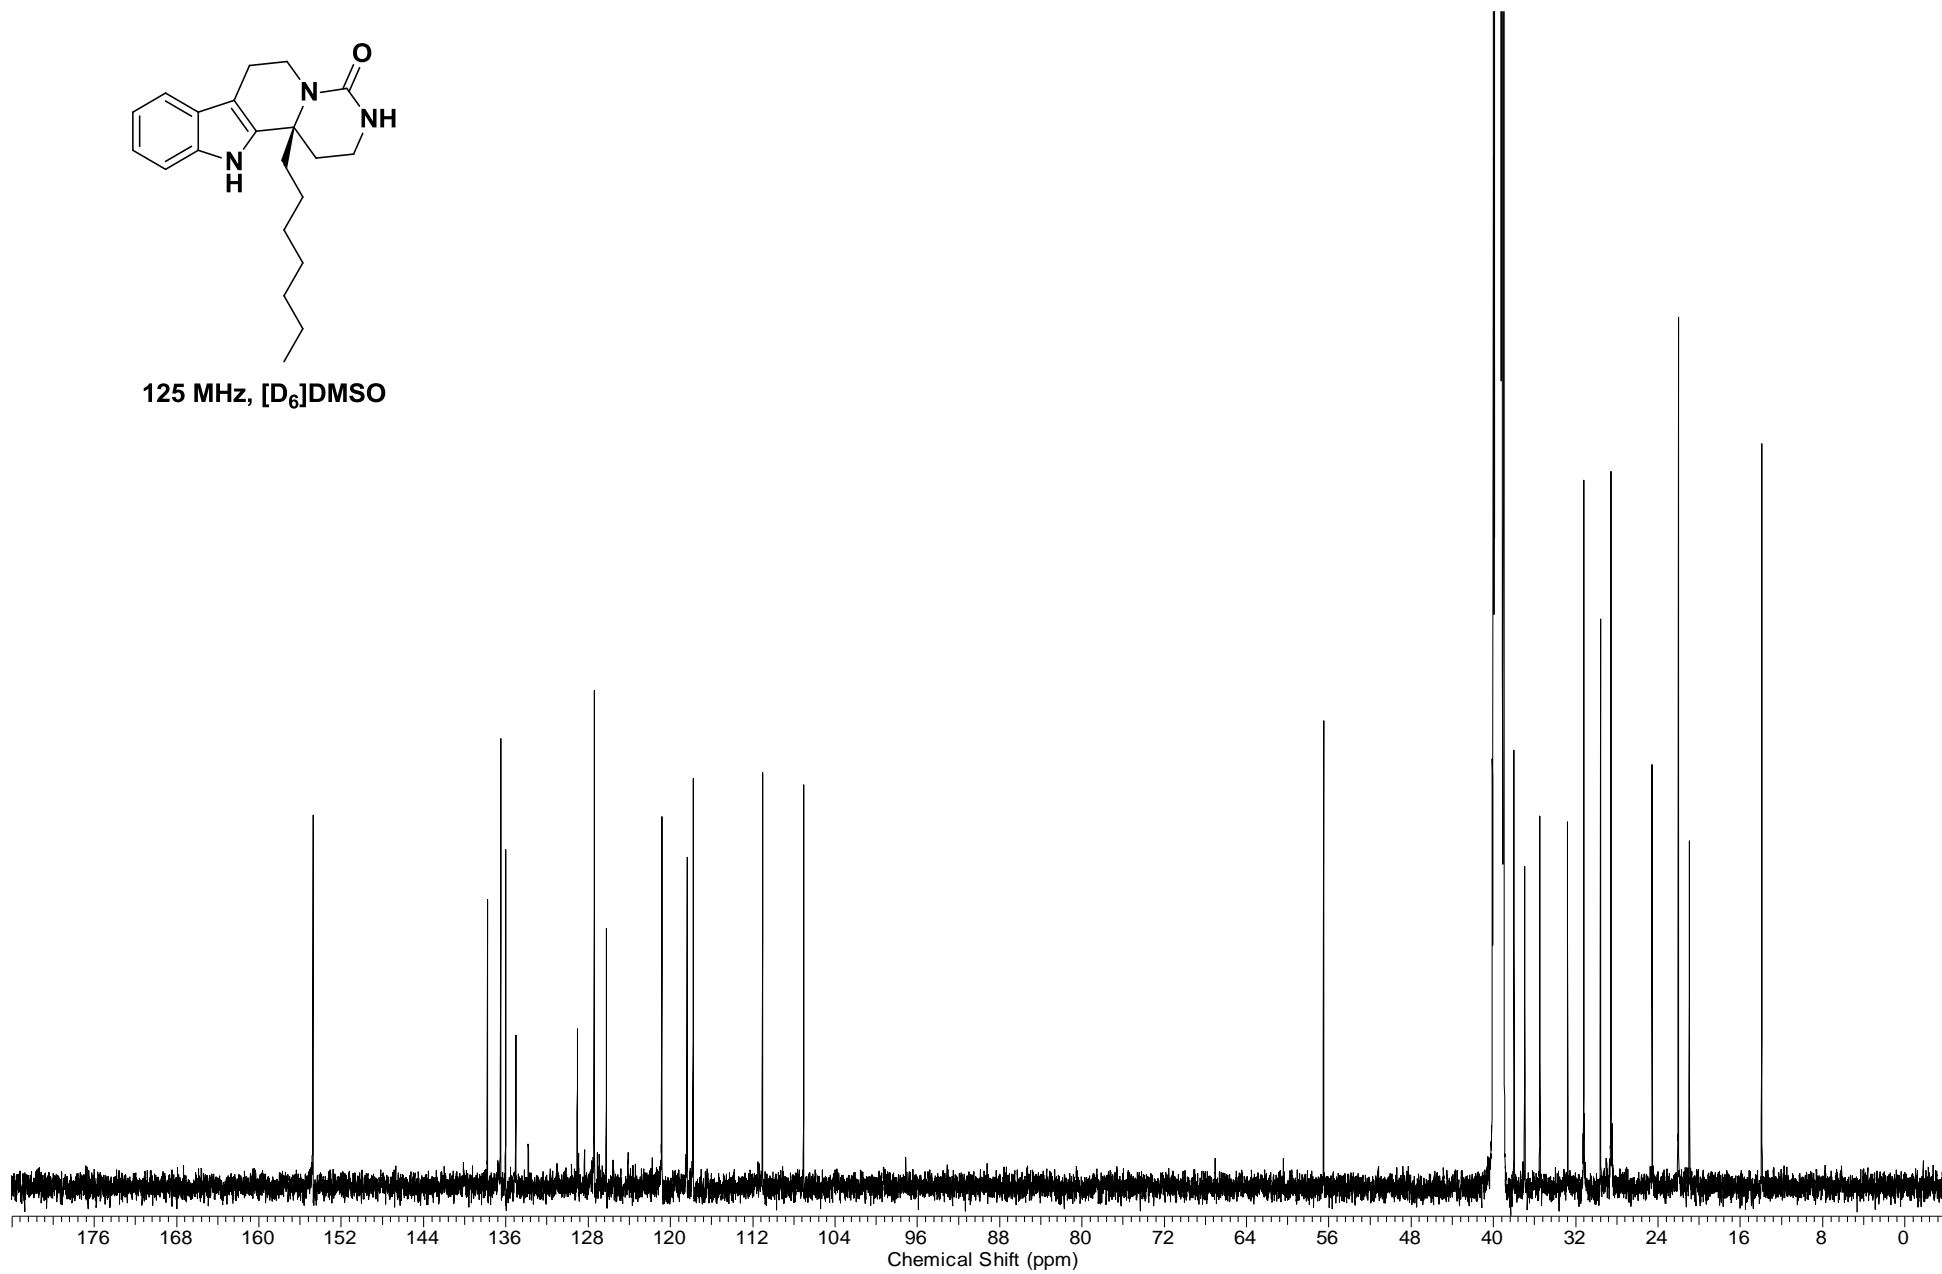



### 4.3.1 $^1\text{H}$ NMR of compound 9c

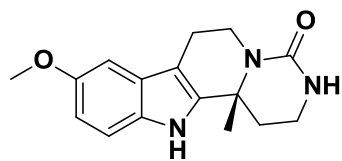

500 MHz, [D<sub>6</sub>]DMSO

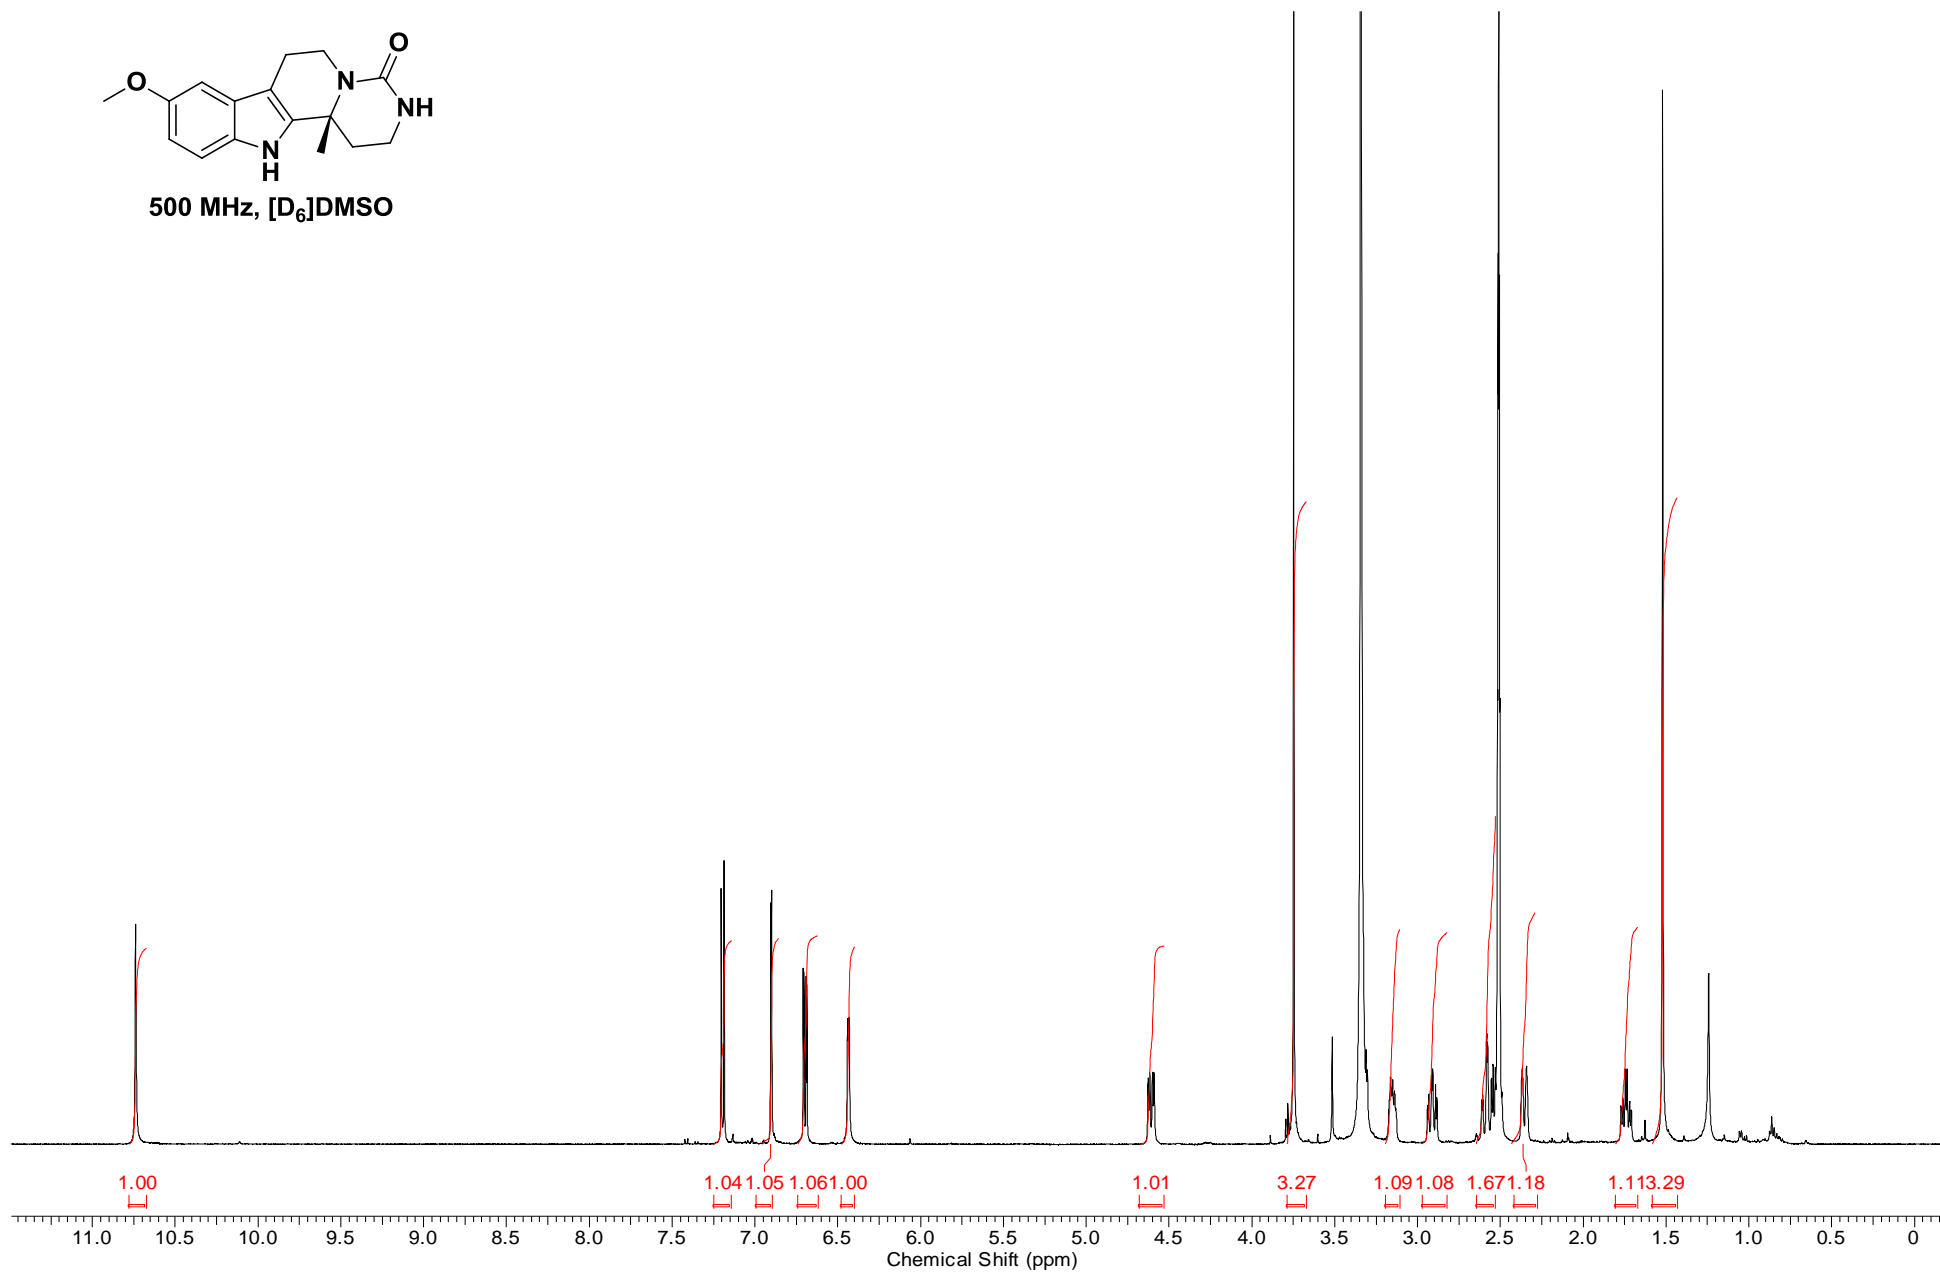

### 4.3.2 $^{13}\text{C}$ NMR of compound 9c

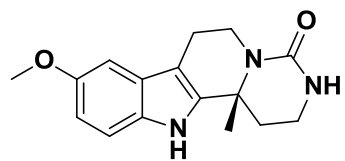

125 MHz,  $[\text{D}_6]\text{DMSO}$

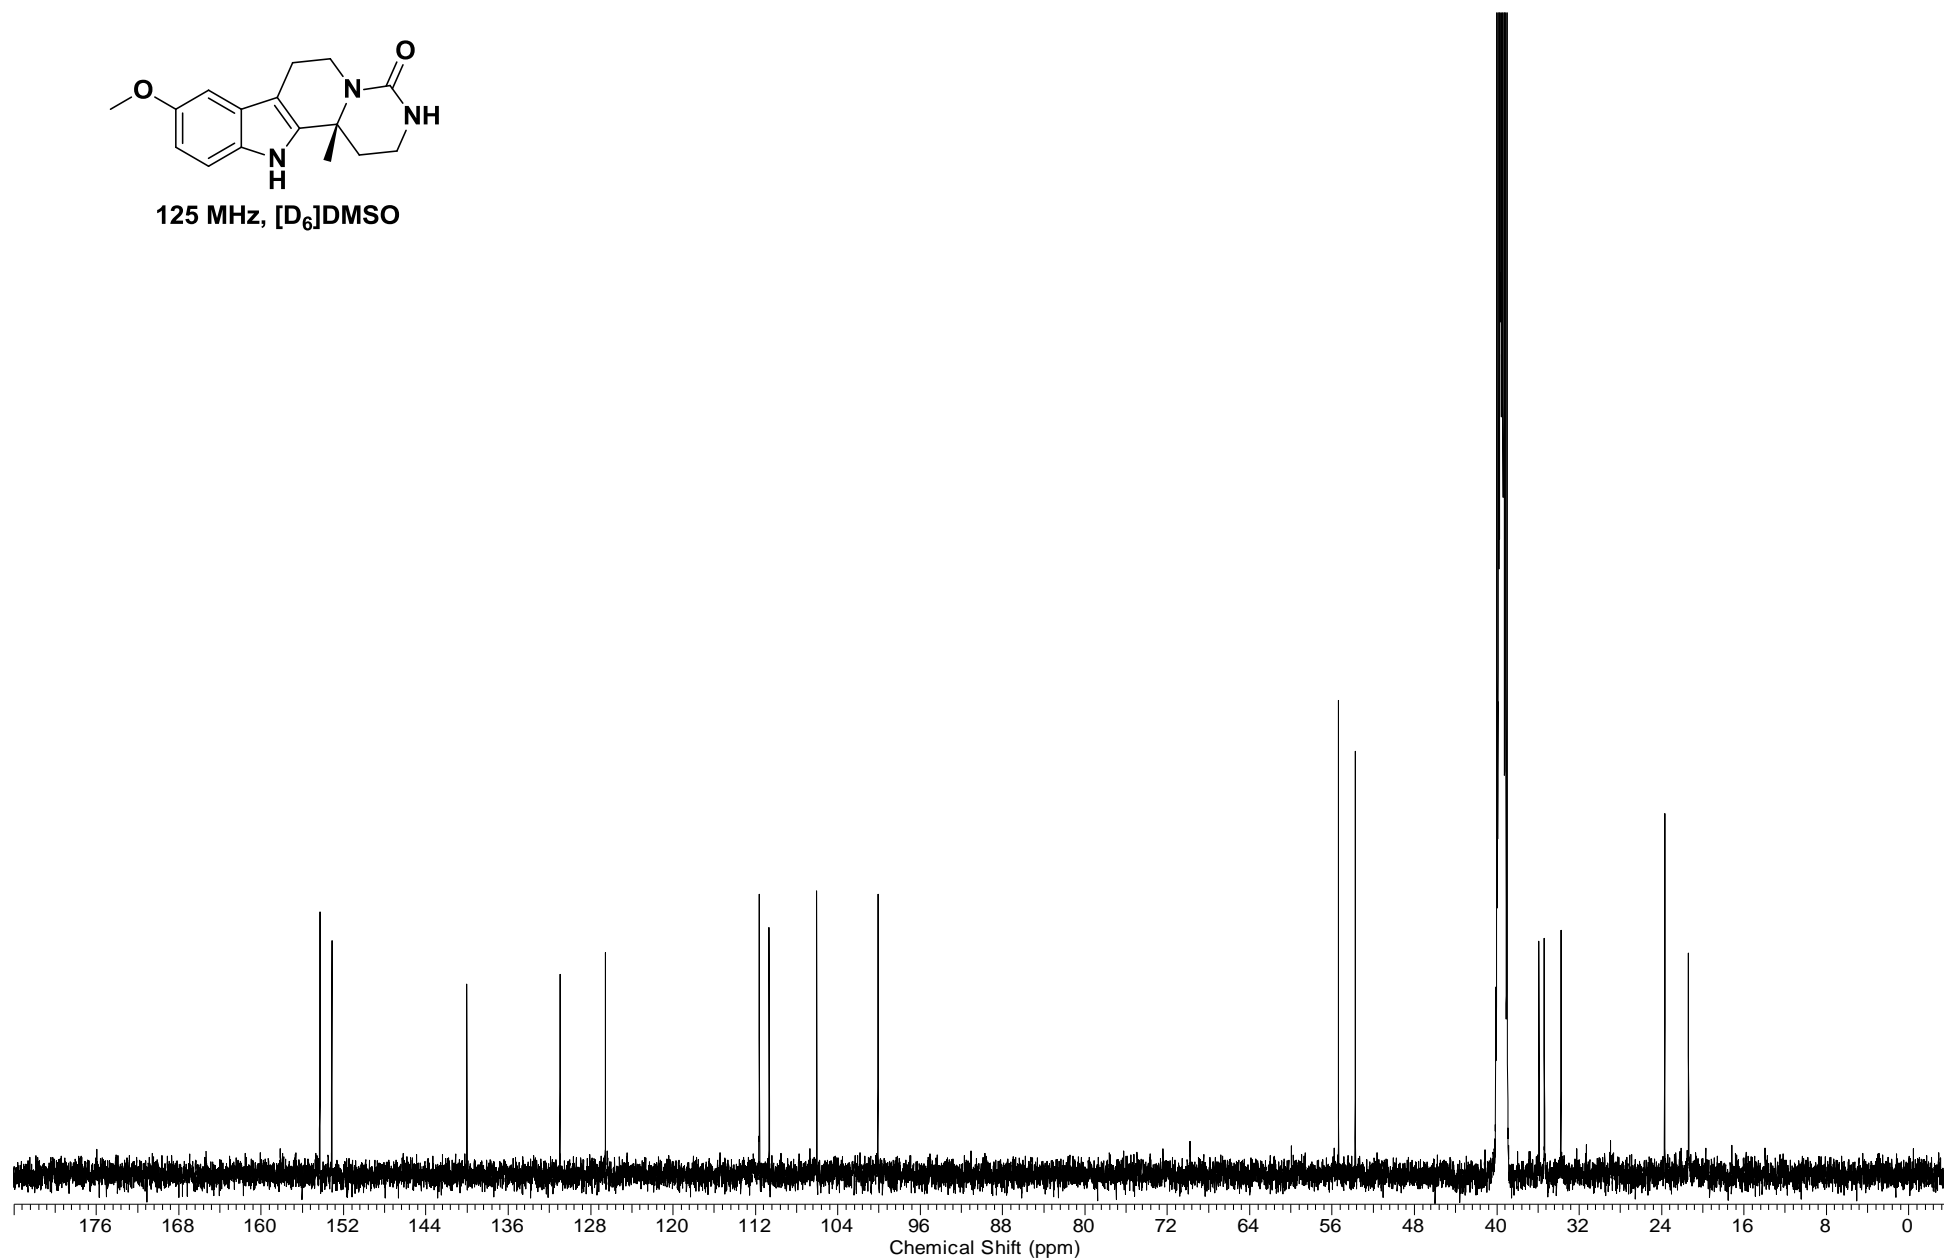

#### 4.4.1 $^1\text{H}$ NMR of compound 9d

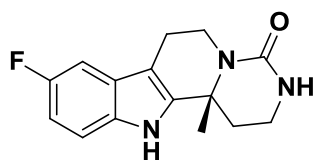

500 MHz,  $[\text{D}_6]\text{DMSO}$

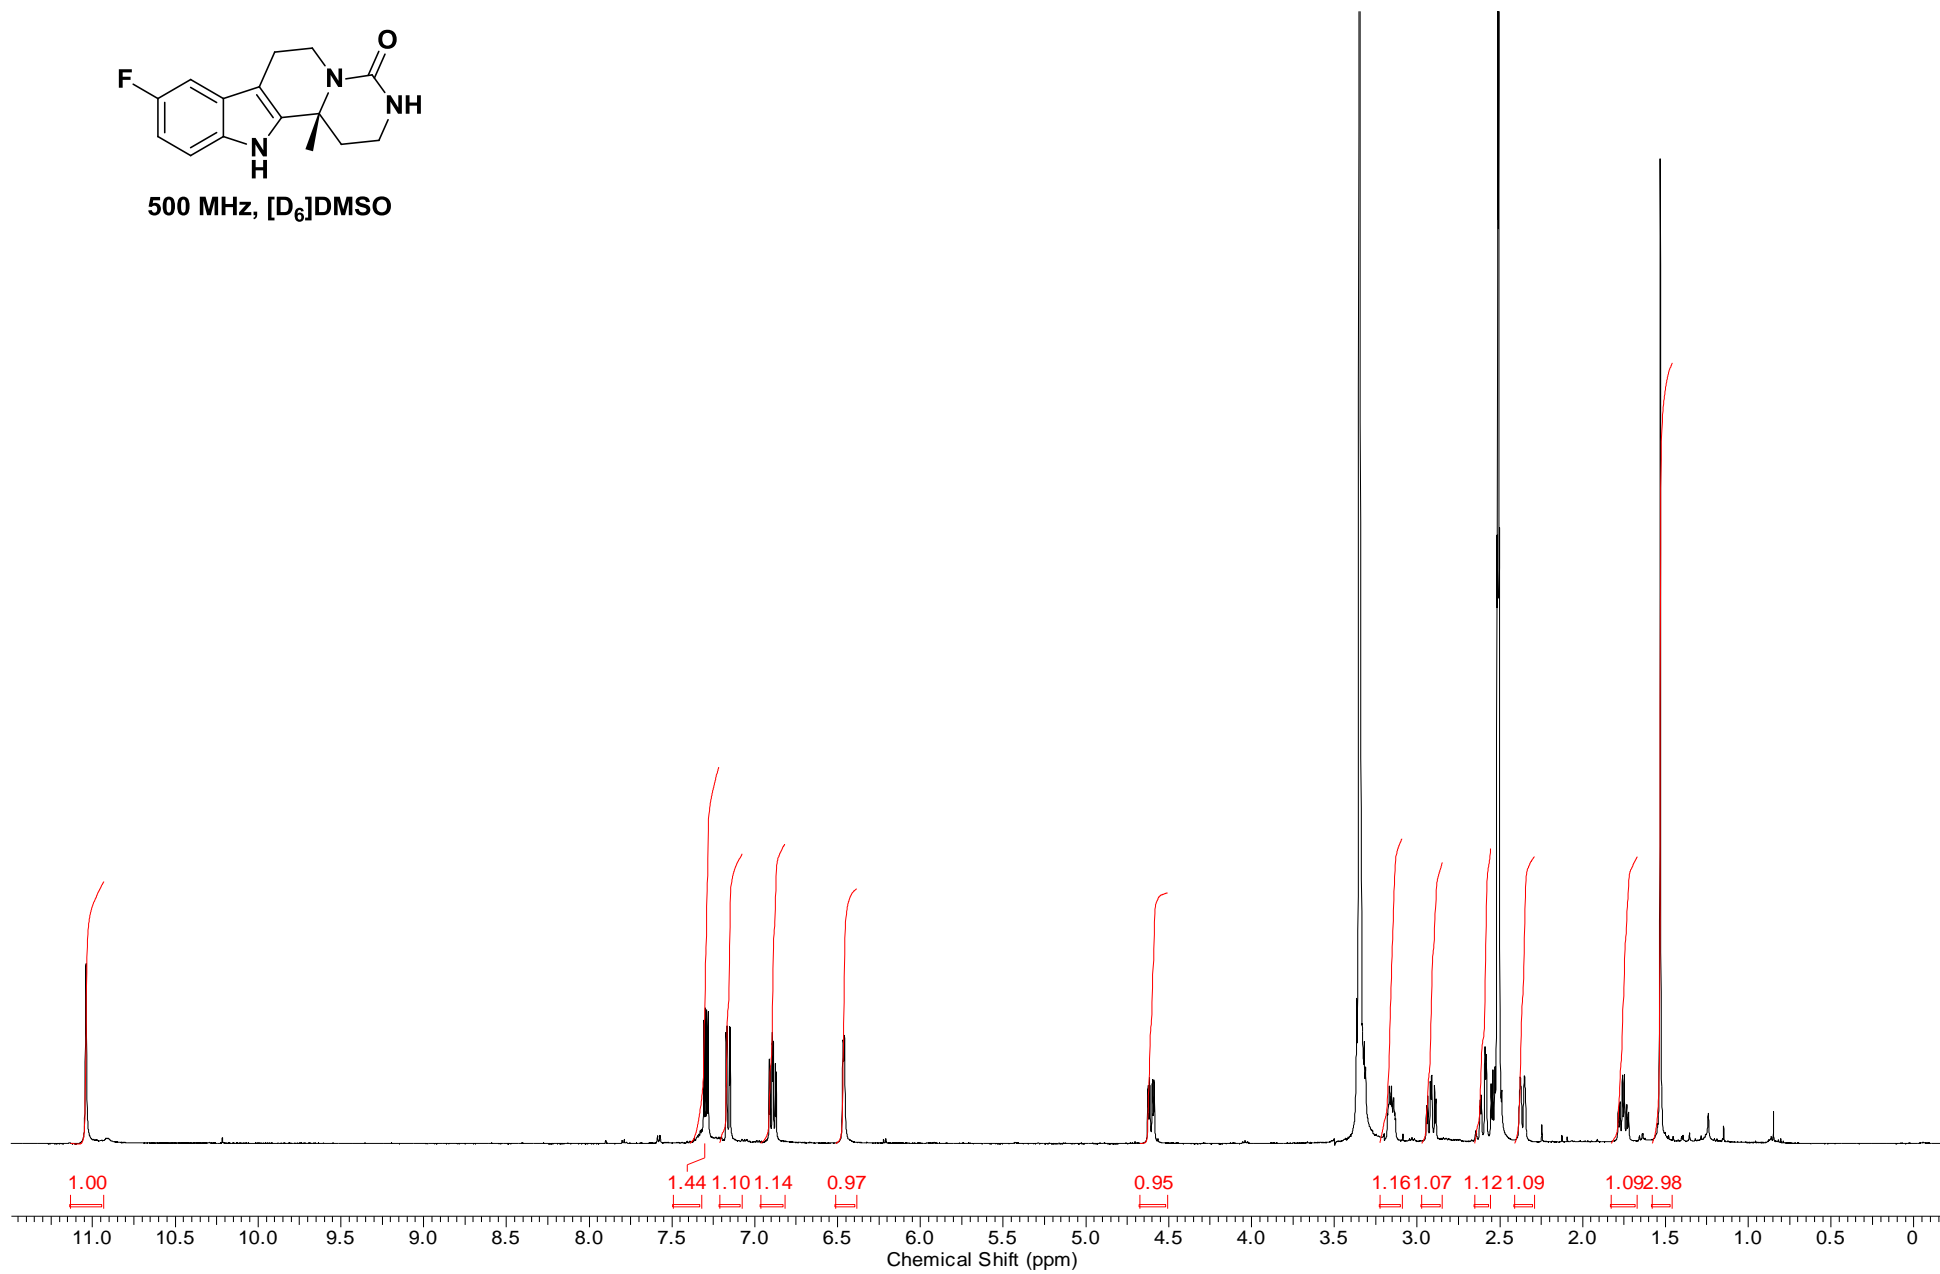

#### 4.4.2 $^{13}\text{C}$ NMR of compound 9d

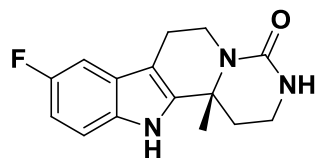

125 MHz,  $[\text{D}_6]\text{DMSO}$

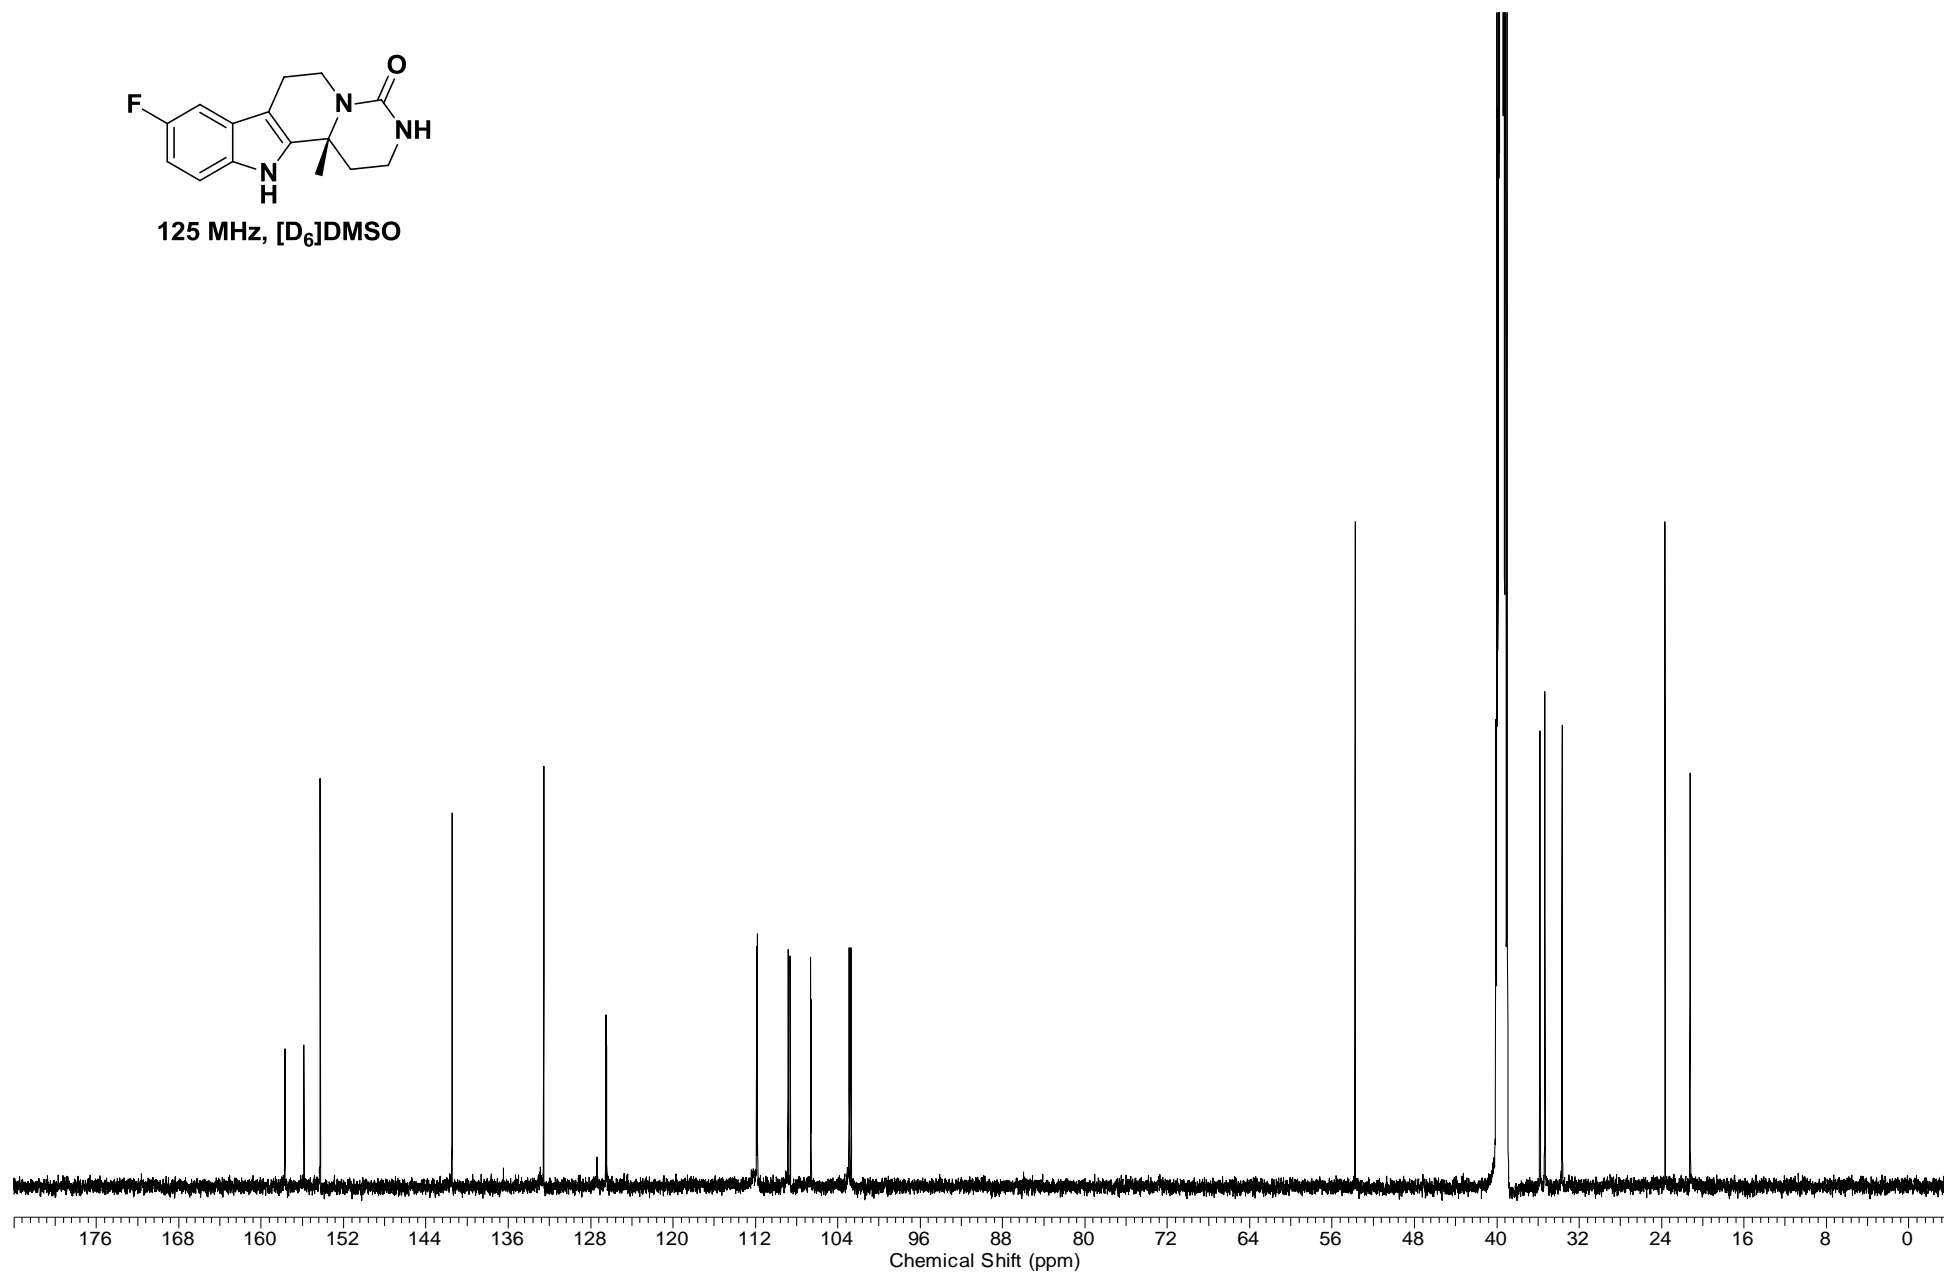

#### 4.5.1 $^1\text{H}$ NMR of compound 9e

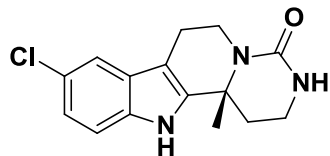

500 MHz,  $[\text{D}_6]\text{DMSO}$

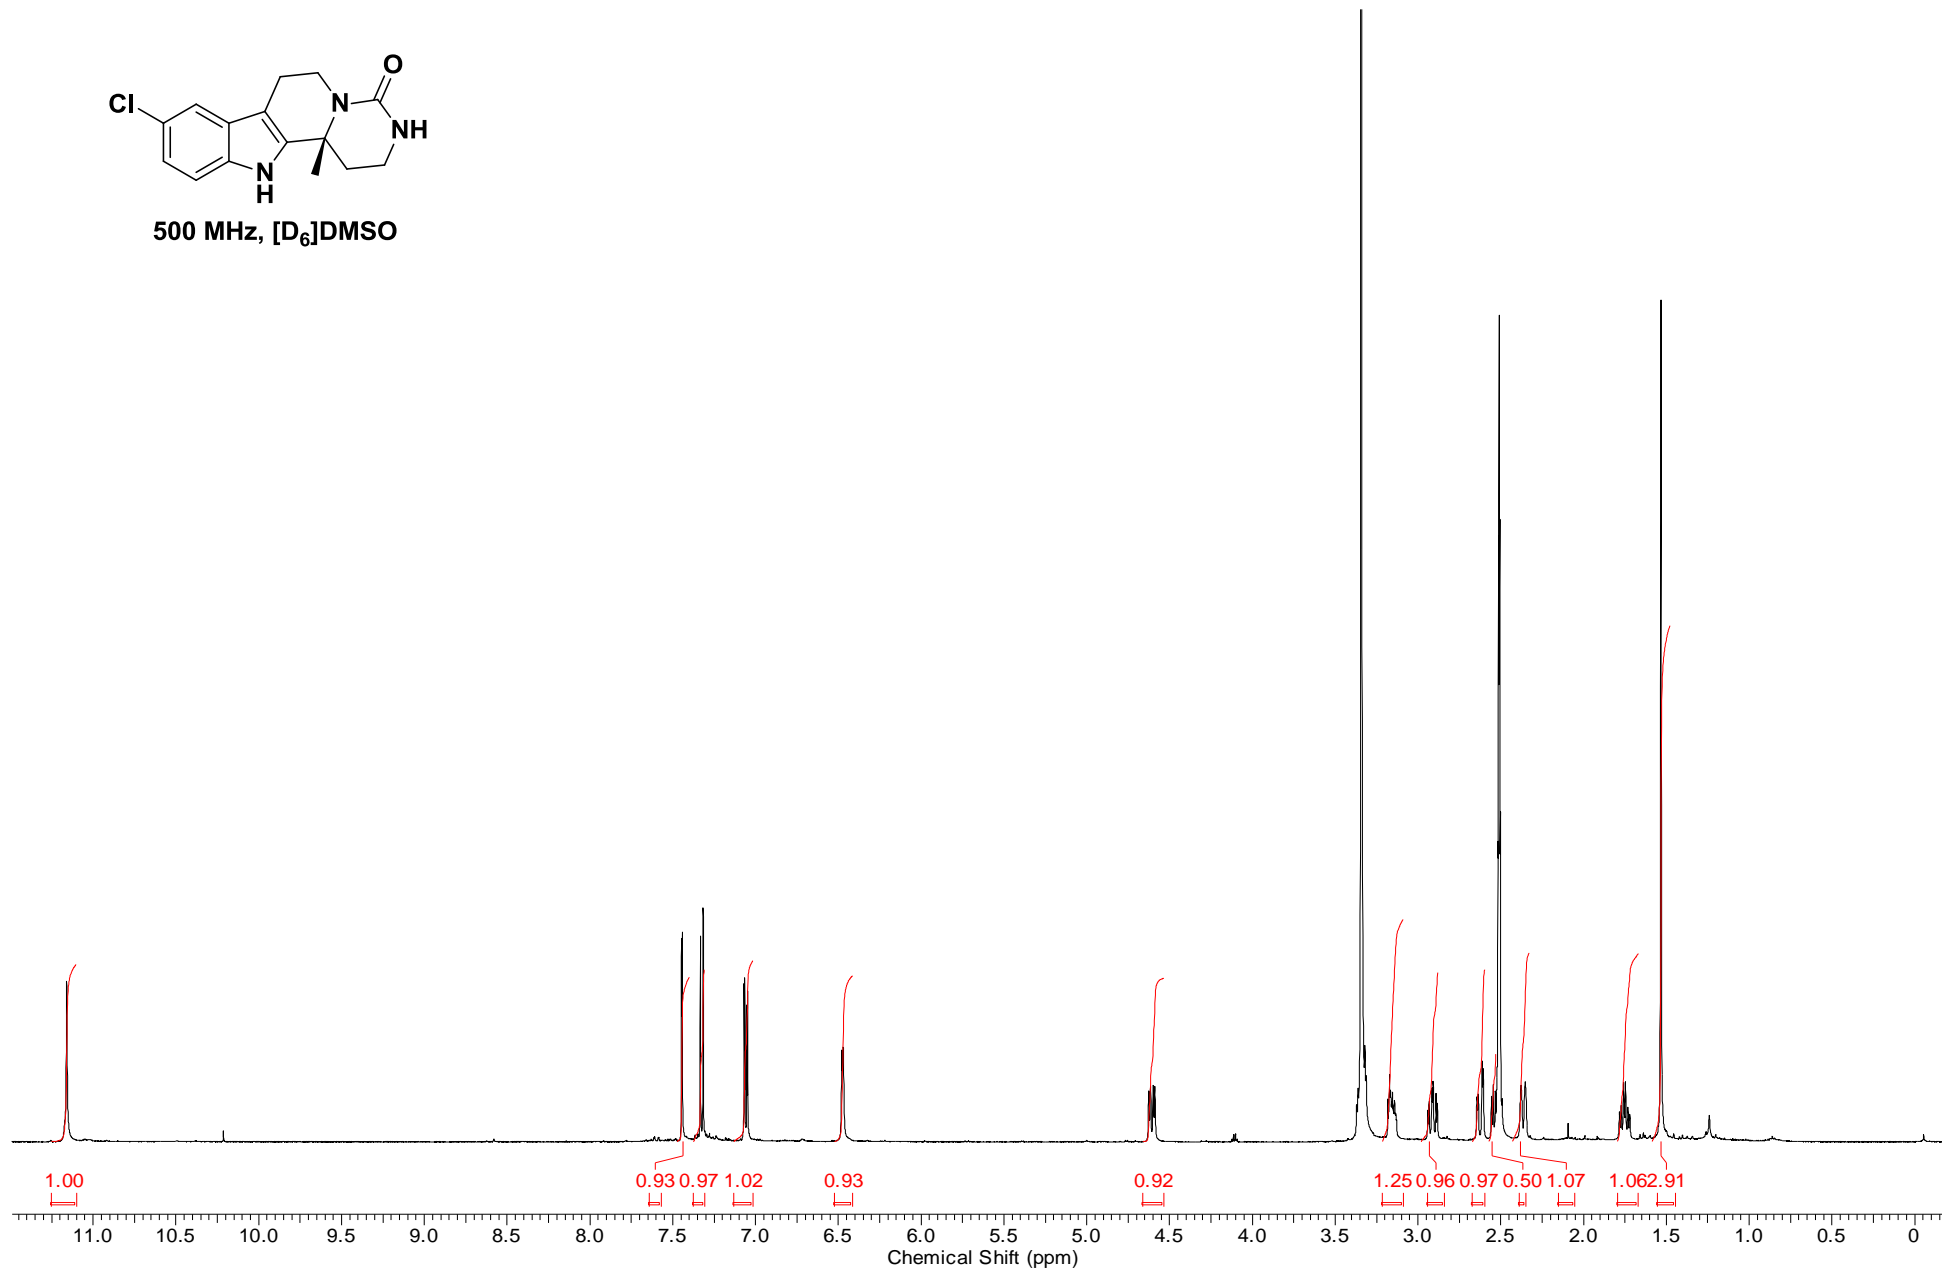

### 4.5.2 $^{13}\text{C}$ NMR of compound 9e

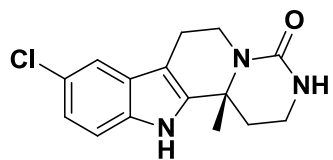

125 MHz,  $[\text{D}_6]\text{DMSO}$

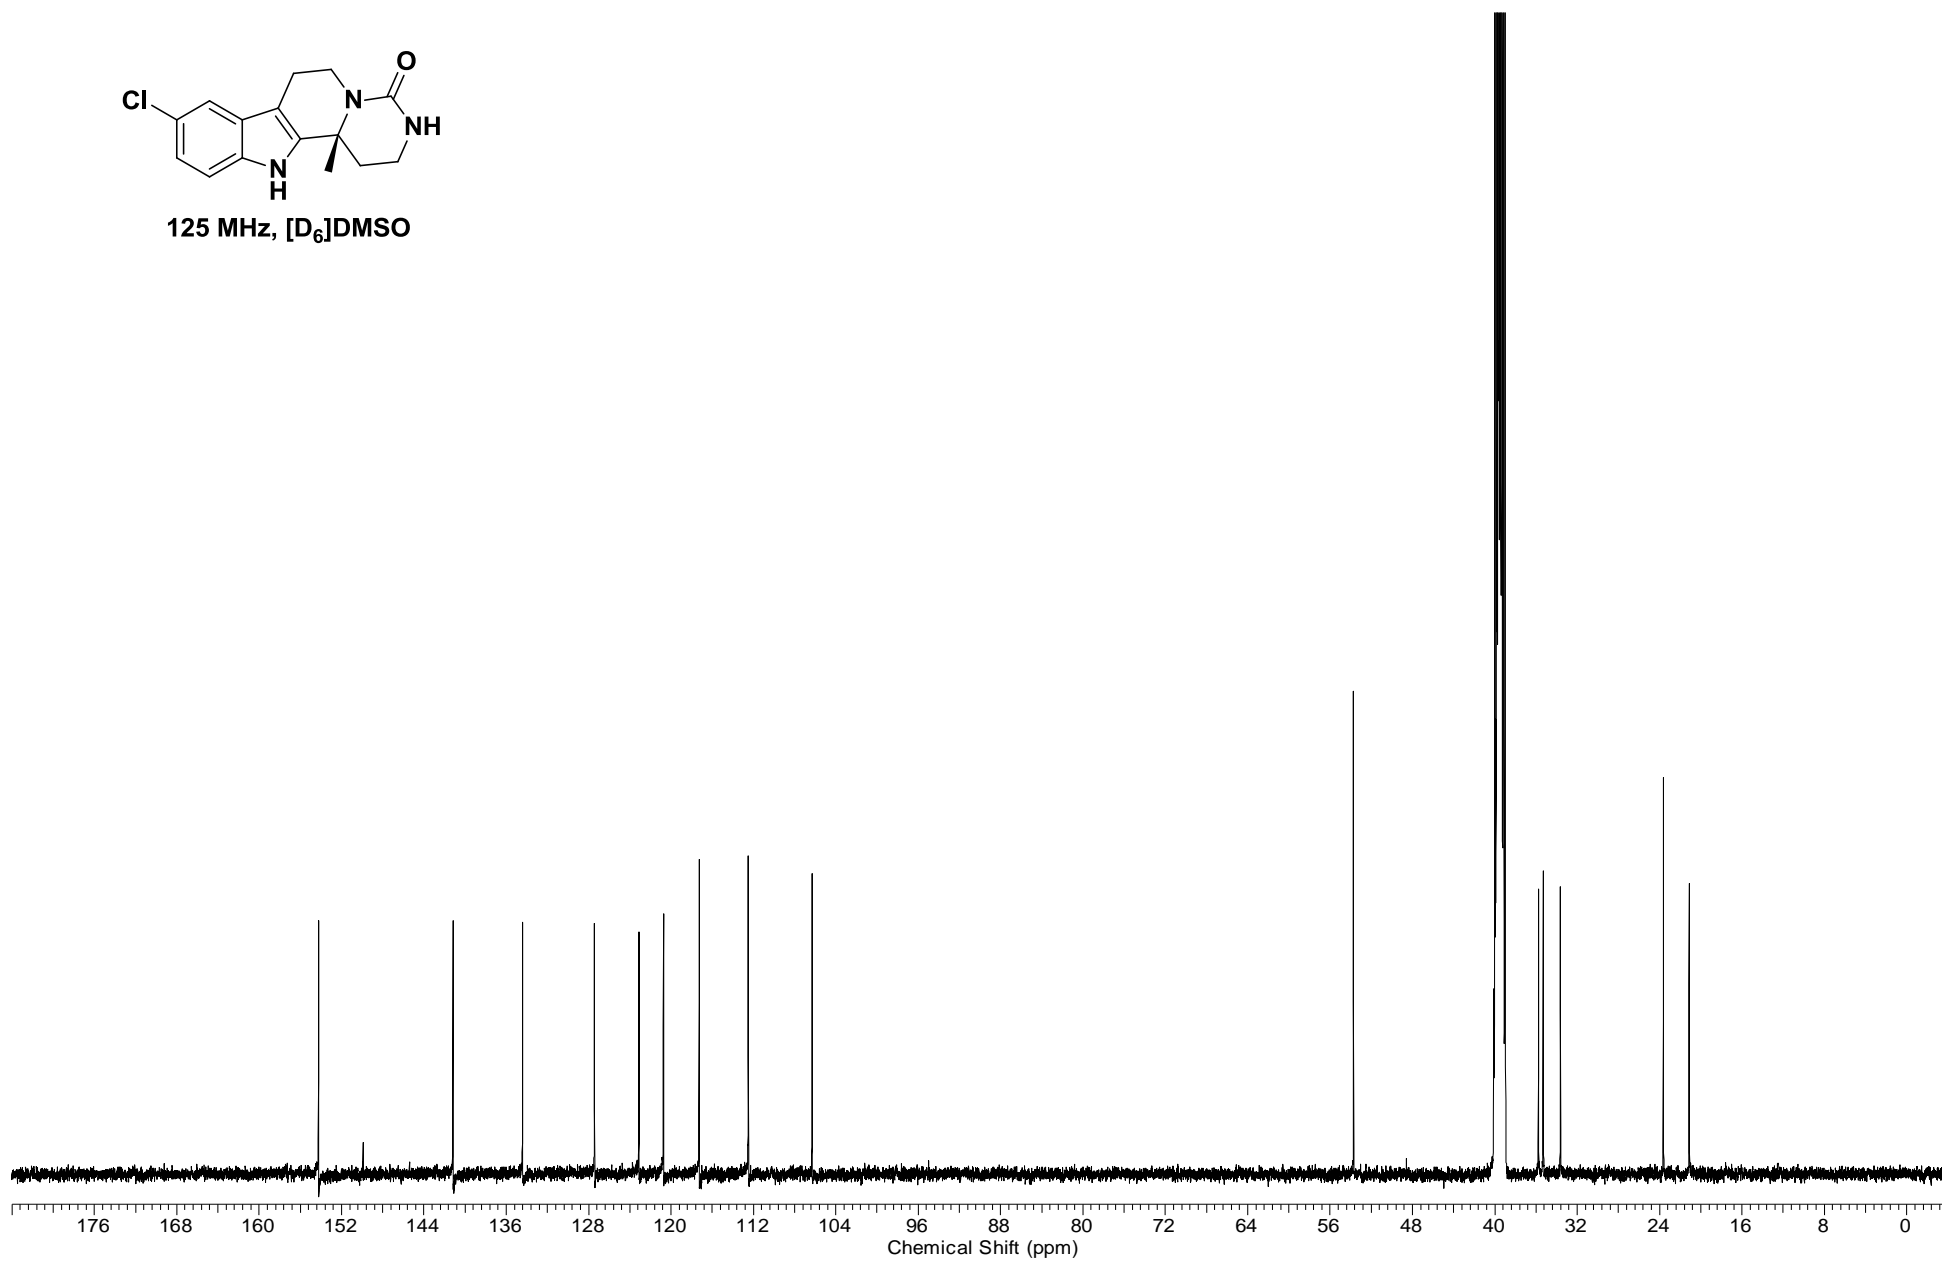

#### 4.6.1 $^1\text{H}$ NMR of compound 9f

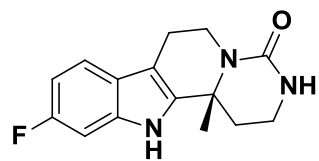

500 MHz,  $[\text{D}_6]\text{DMSO}$

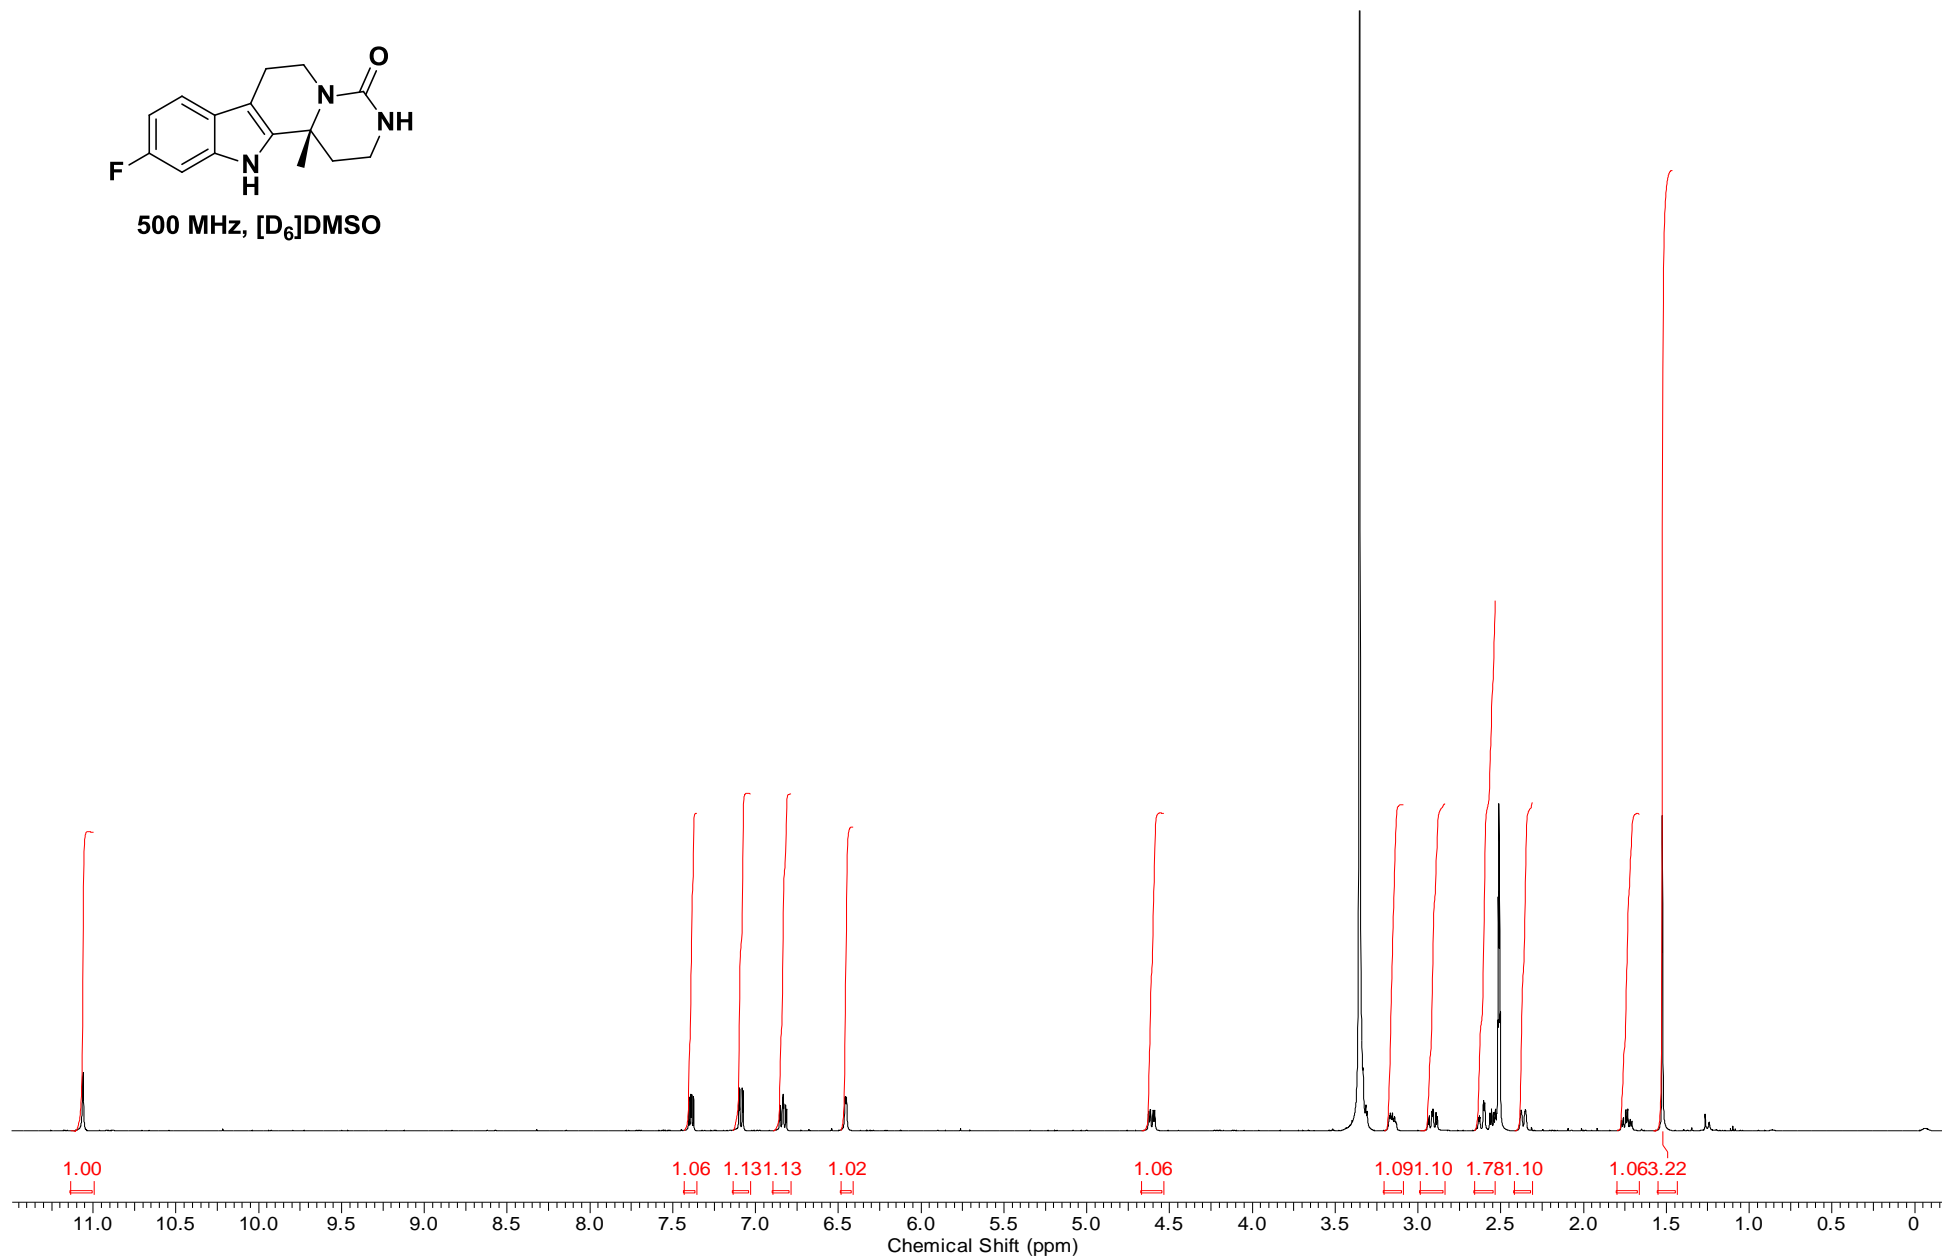

#### 4.6.2 $^{13}\text{C}$ NMR of compound 9f

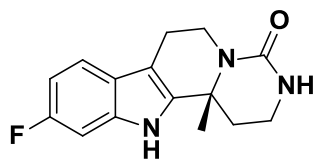

125 MHz,  $[\text{D}_6]\text{DMSO}$

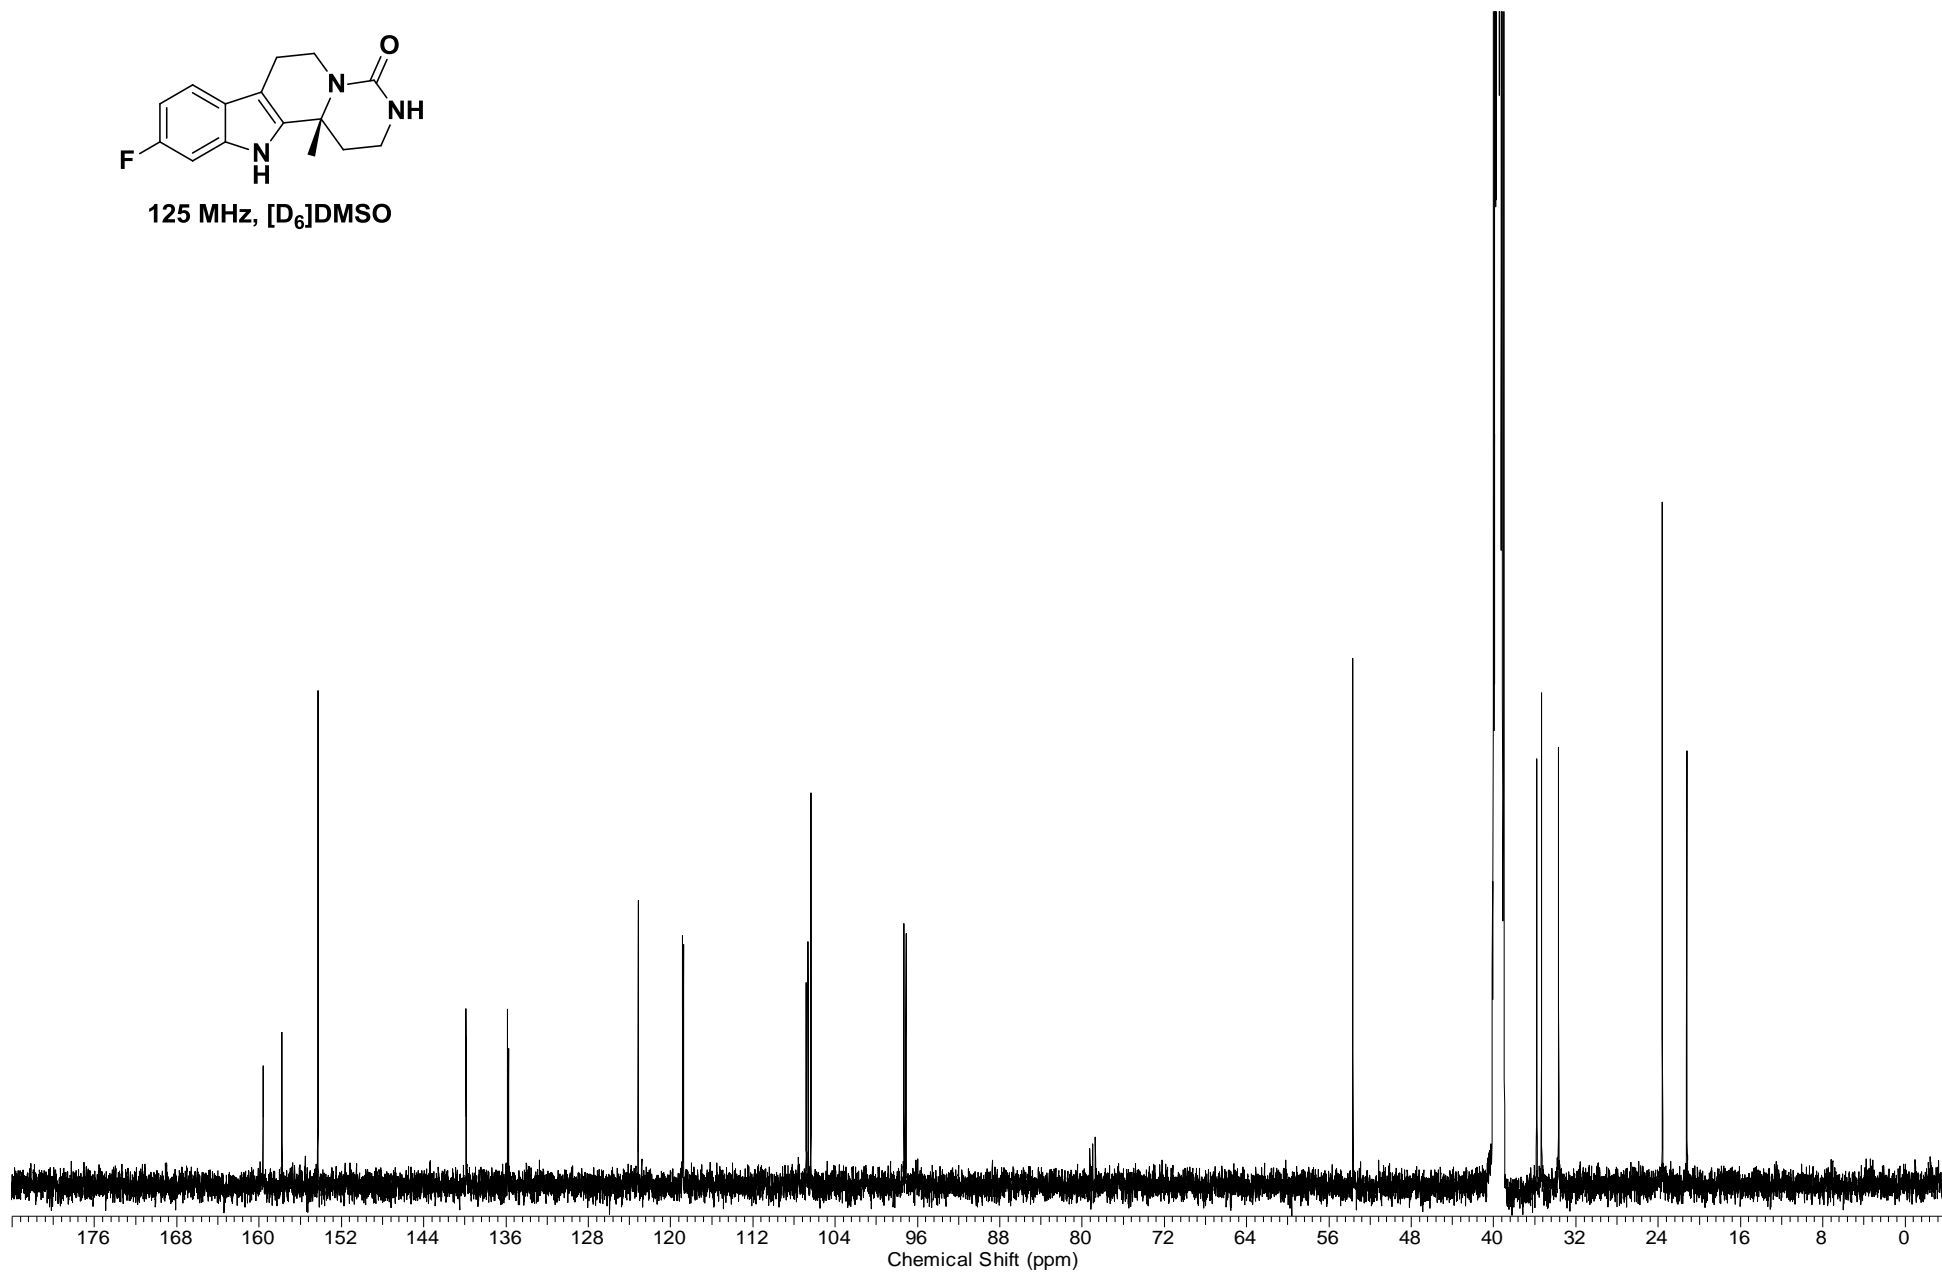



### 4.7.1 $^1\text{H}$ NMR of compound 9g

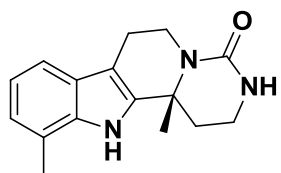

500 MHz,  $[\text{D}_6]\text{DMSO}$

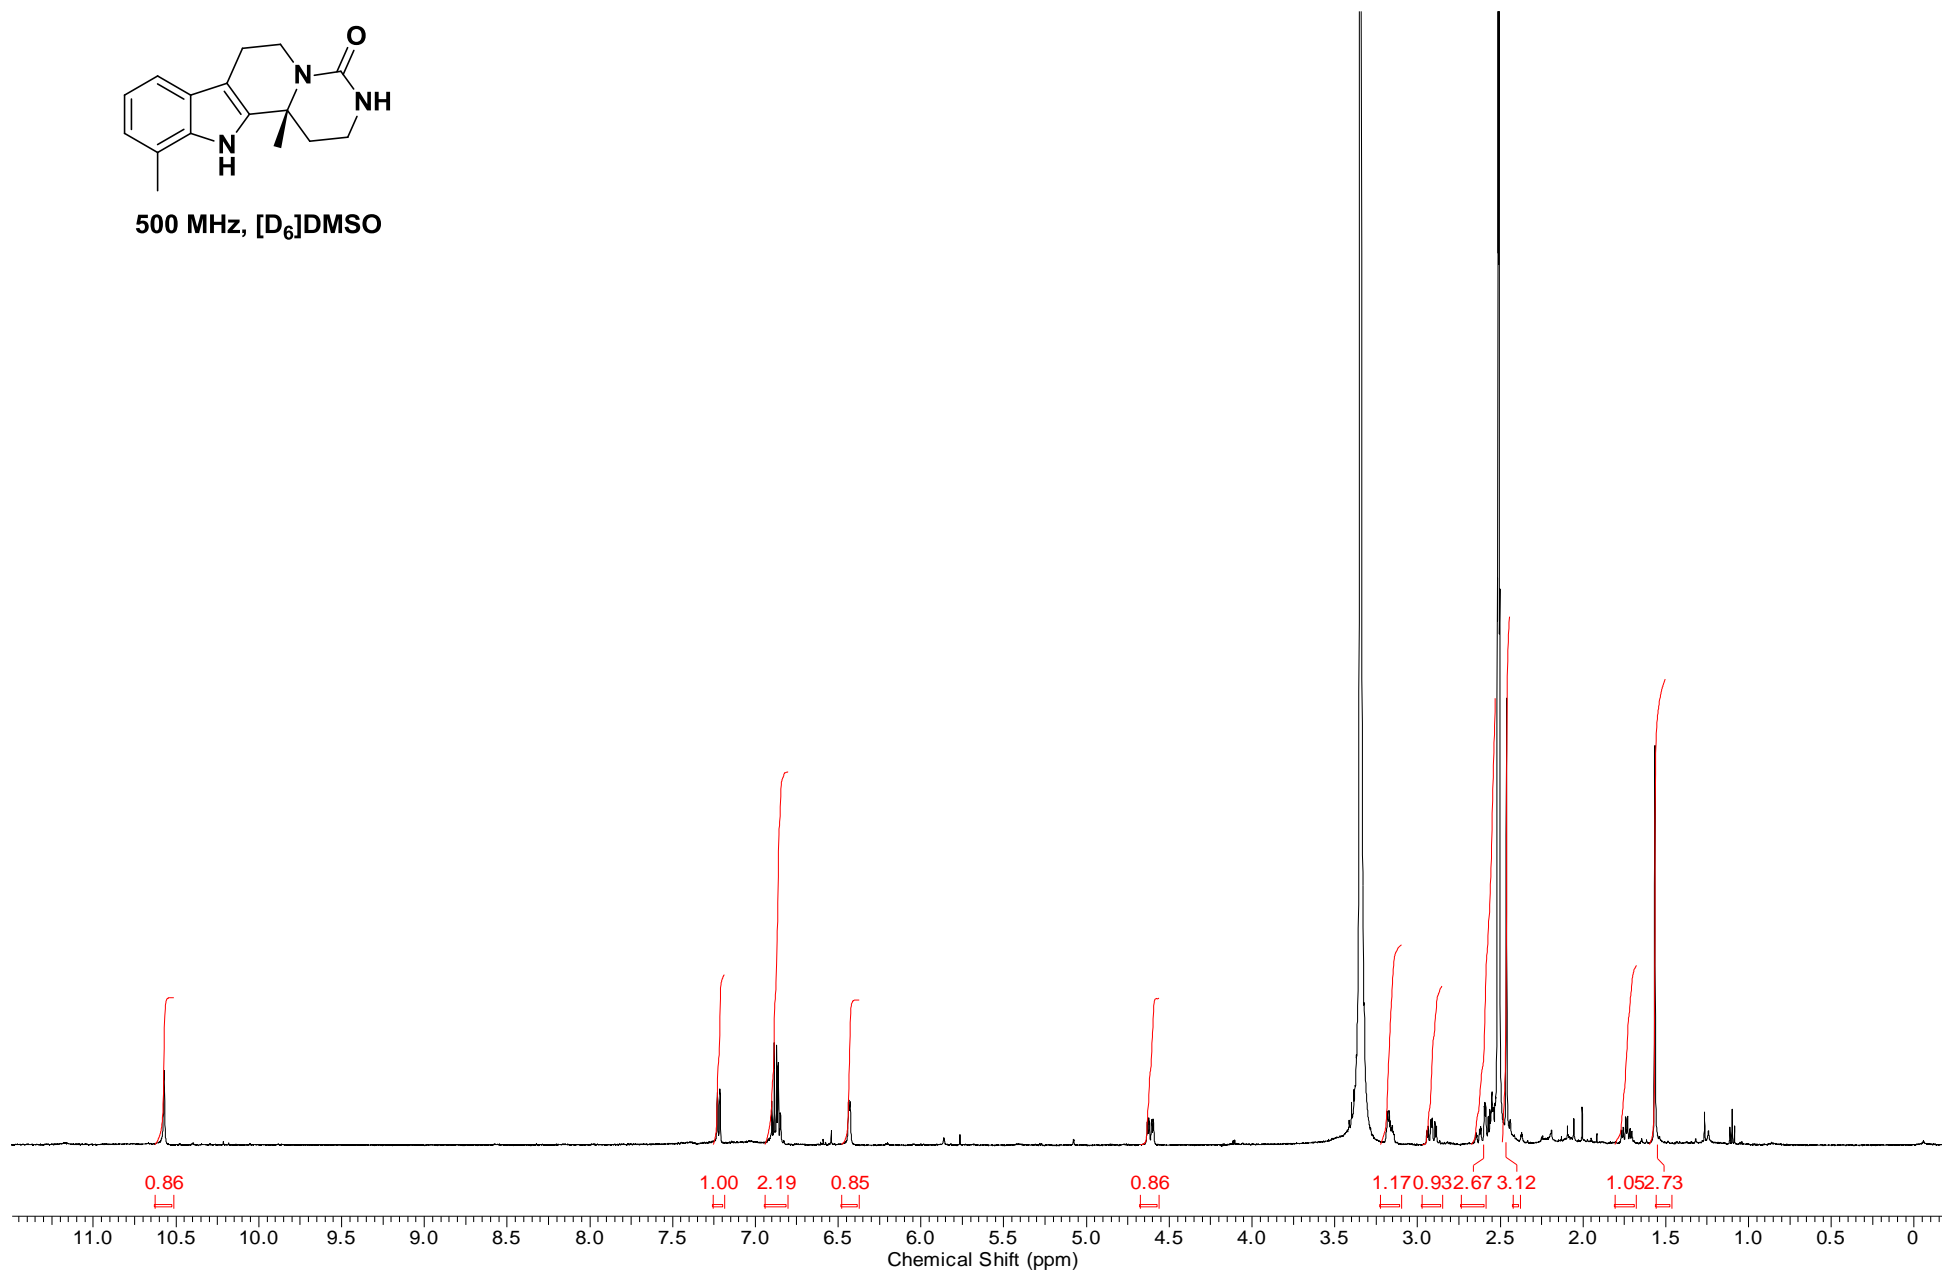

#### 4.7.2 $^{13}\text{C}$ NMR of compound 9g

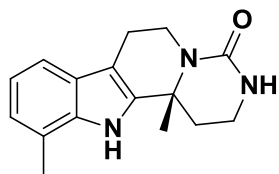

125 MHz,  $[\text{D}_6]\text{DMSO}$

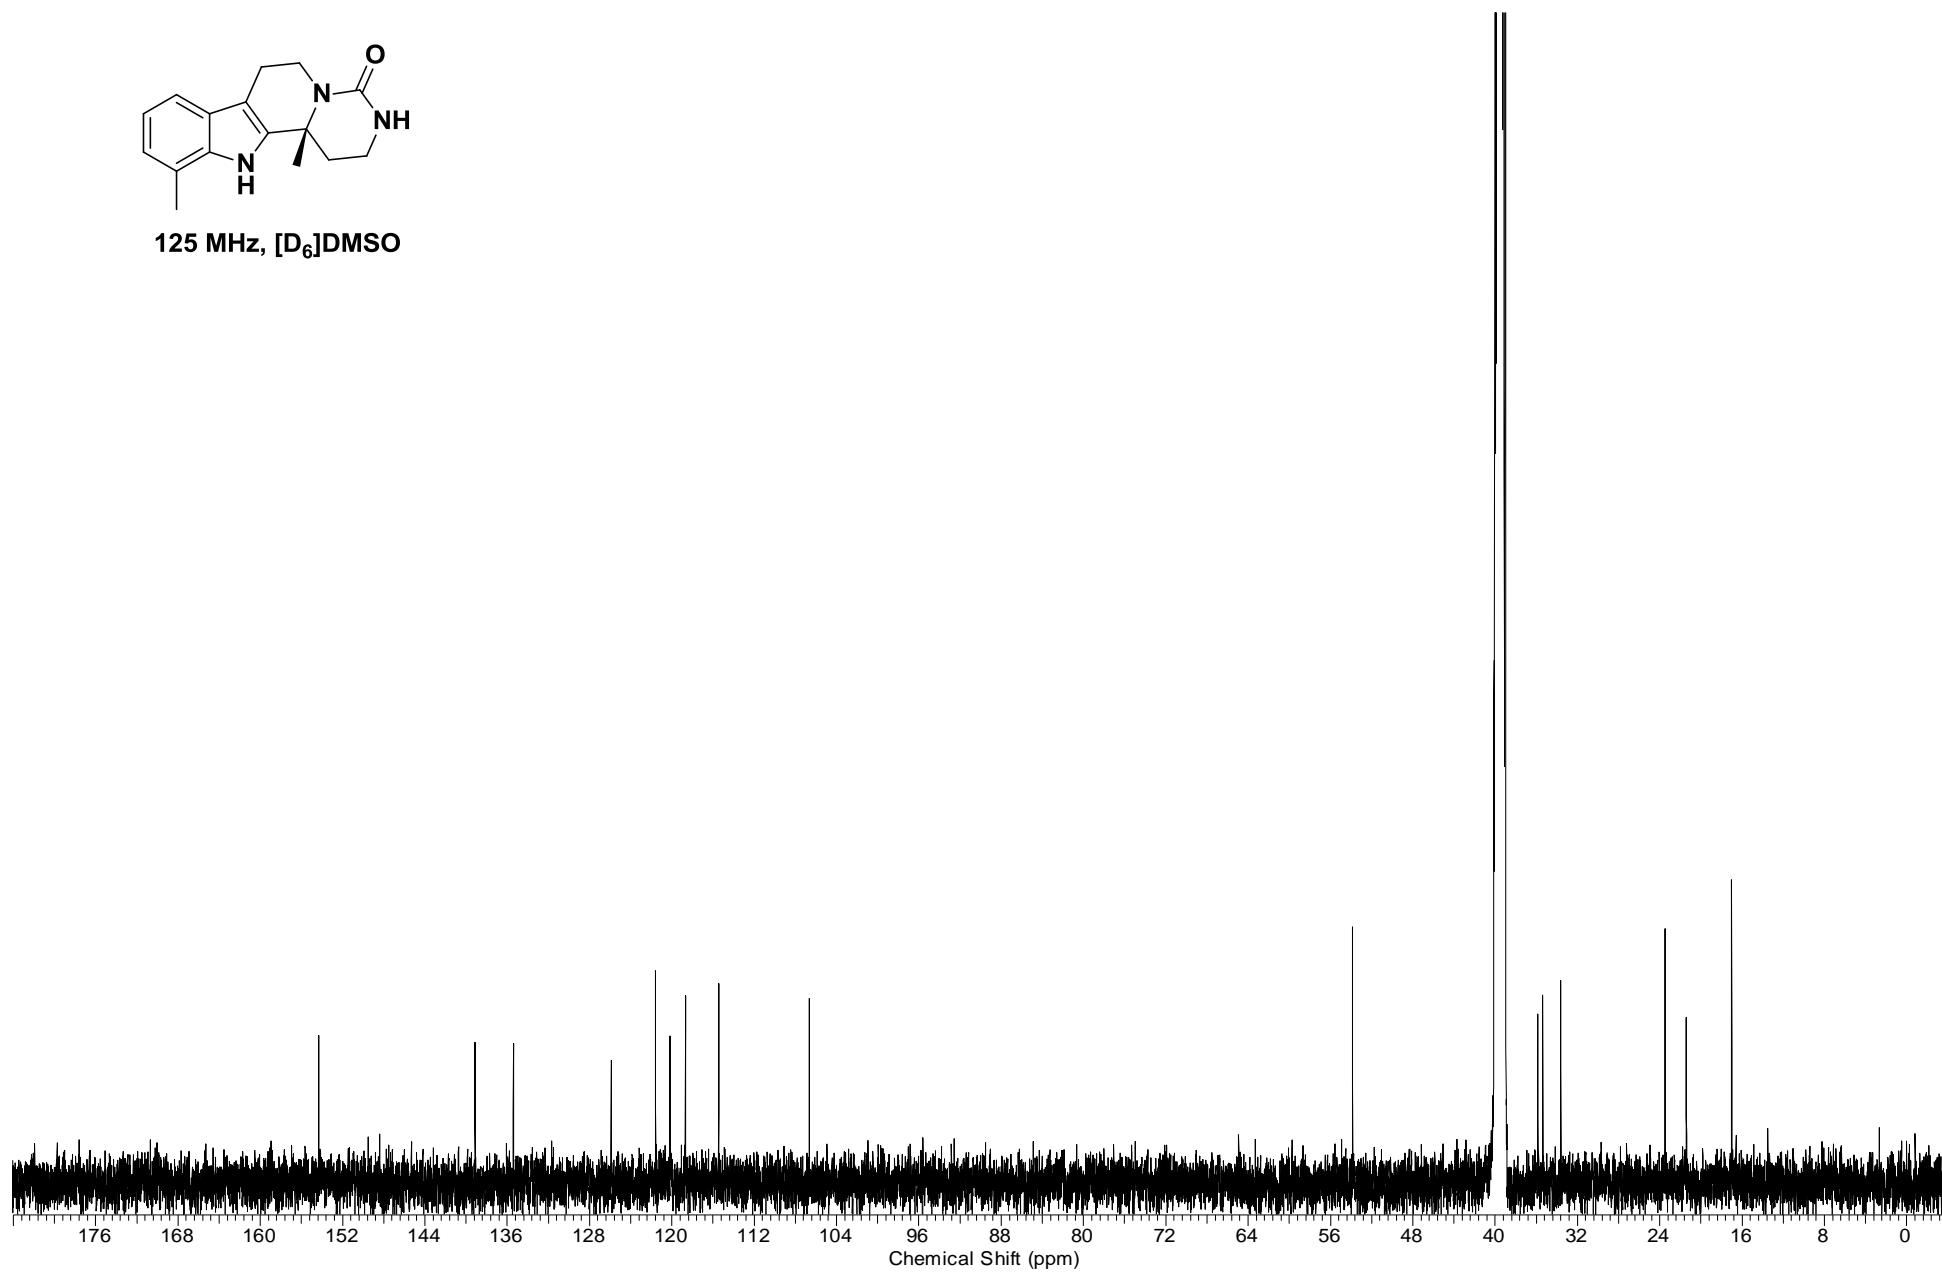

### 4.8.1 $^1\text{H}$ NMR of compound 9h

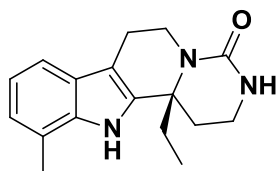

500 MHz,  $[\text{D}_6]\text{DMSO}$

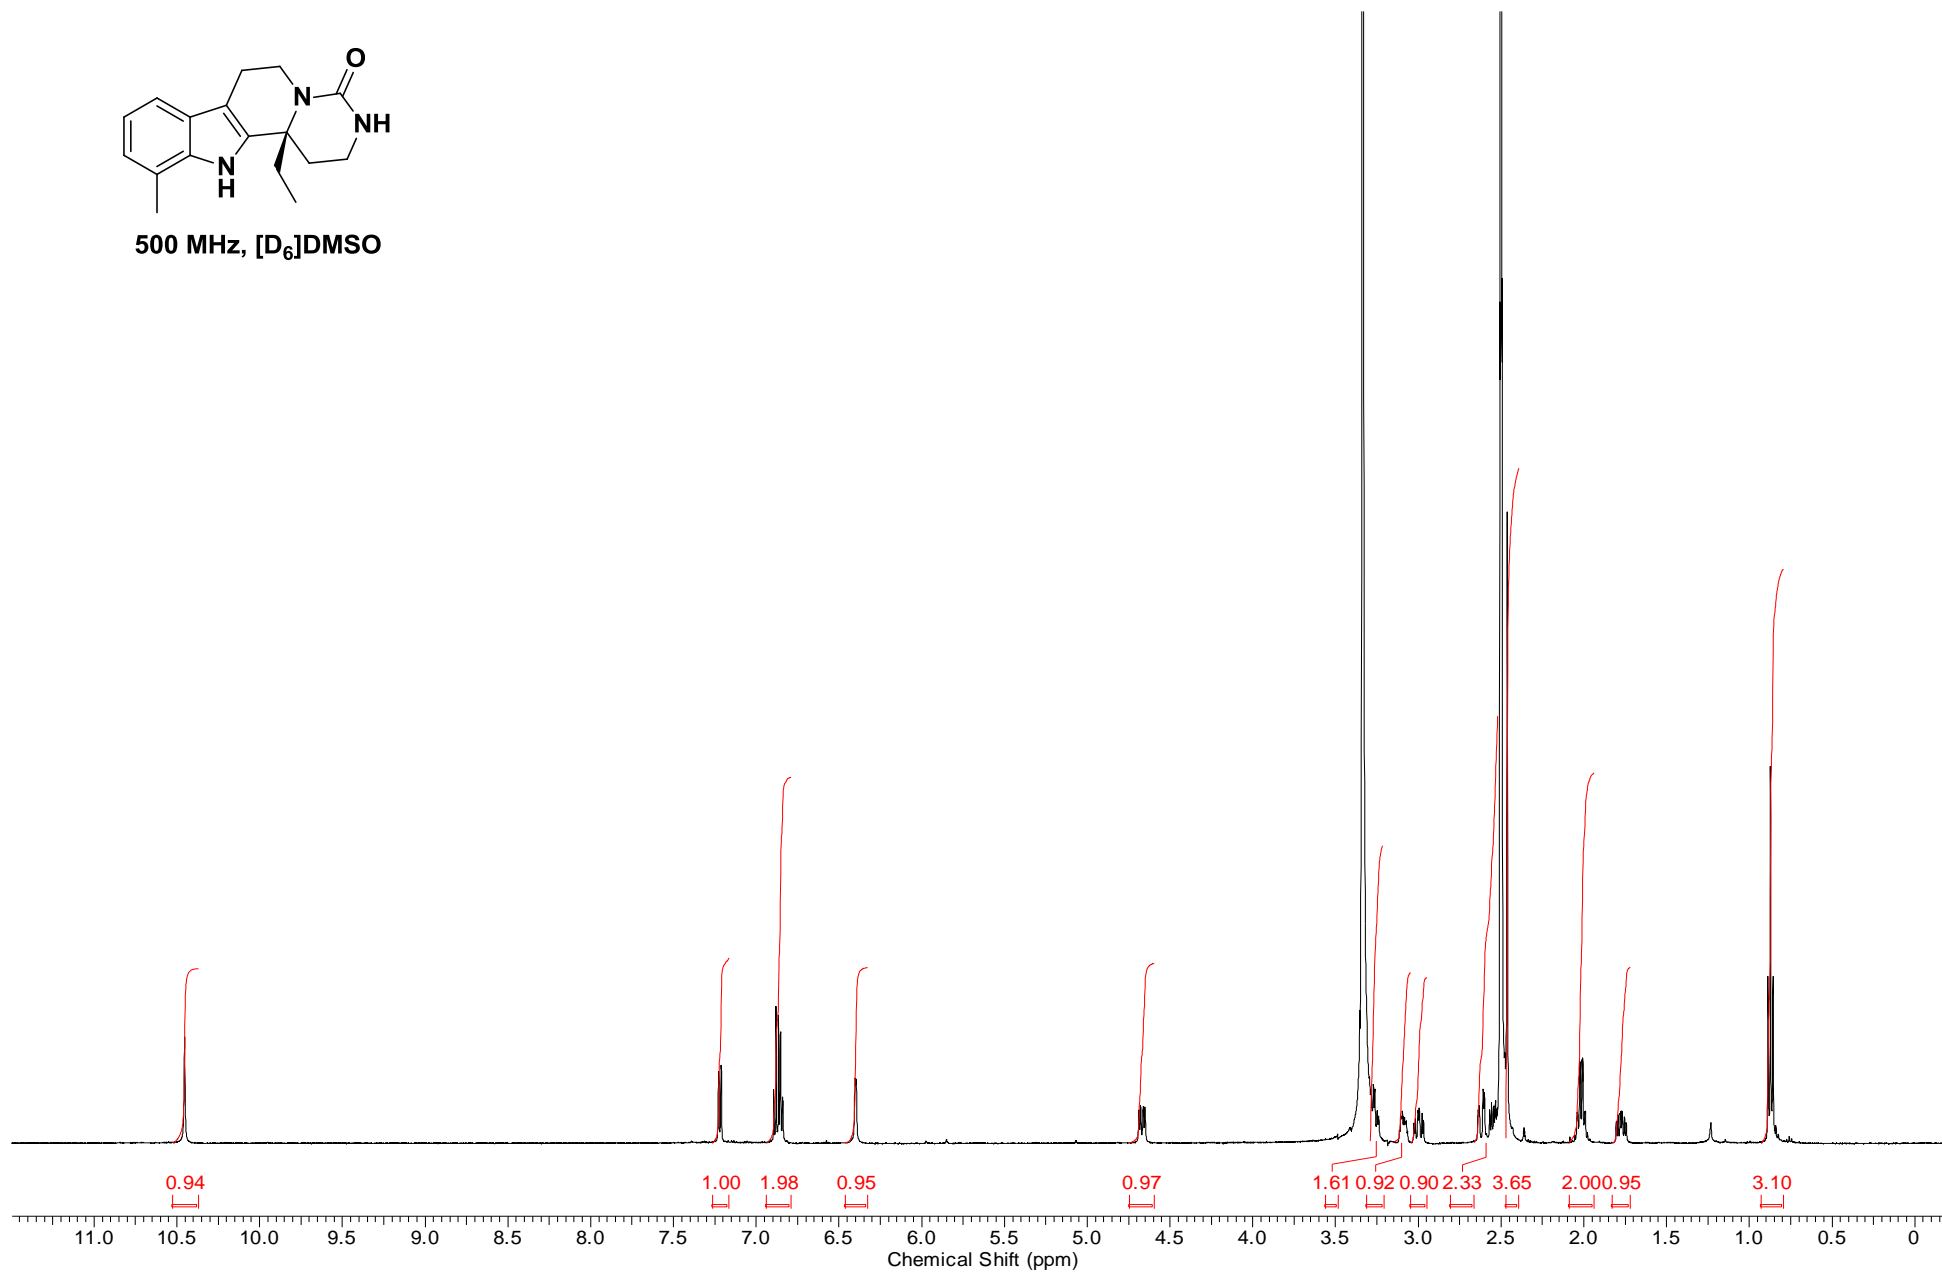

## 4.8.2 $^{13}\text{C}$ NMR of compound 9h

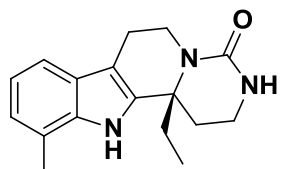

125 MHz,  $[\text{D}_6]\text{DMSO}$

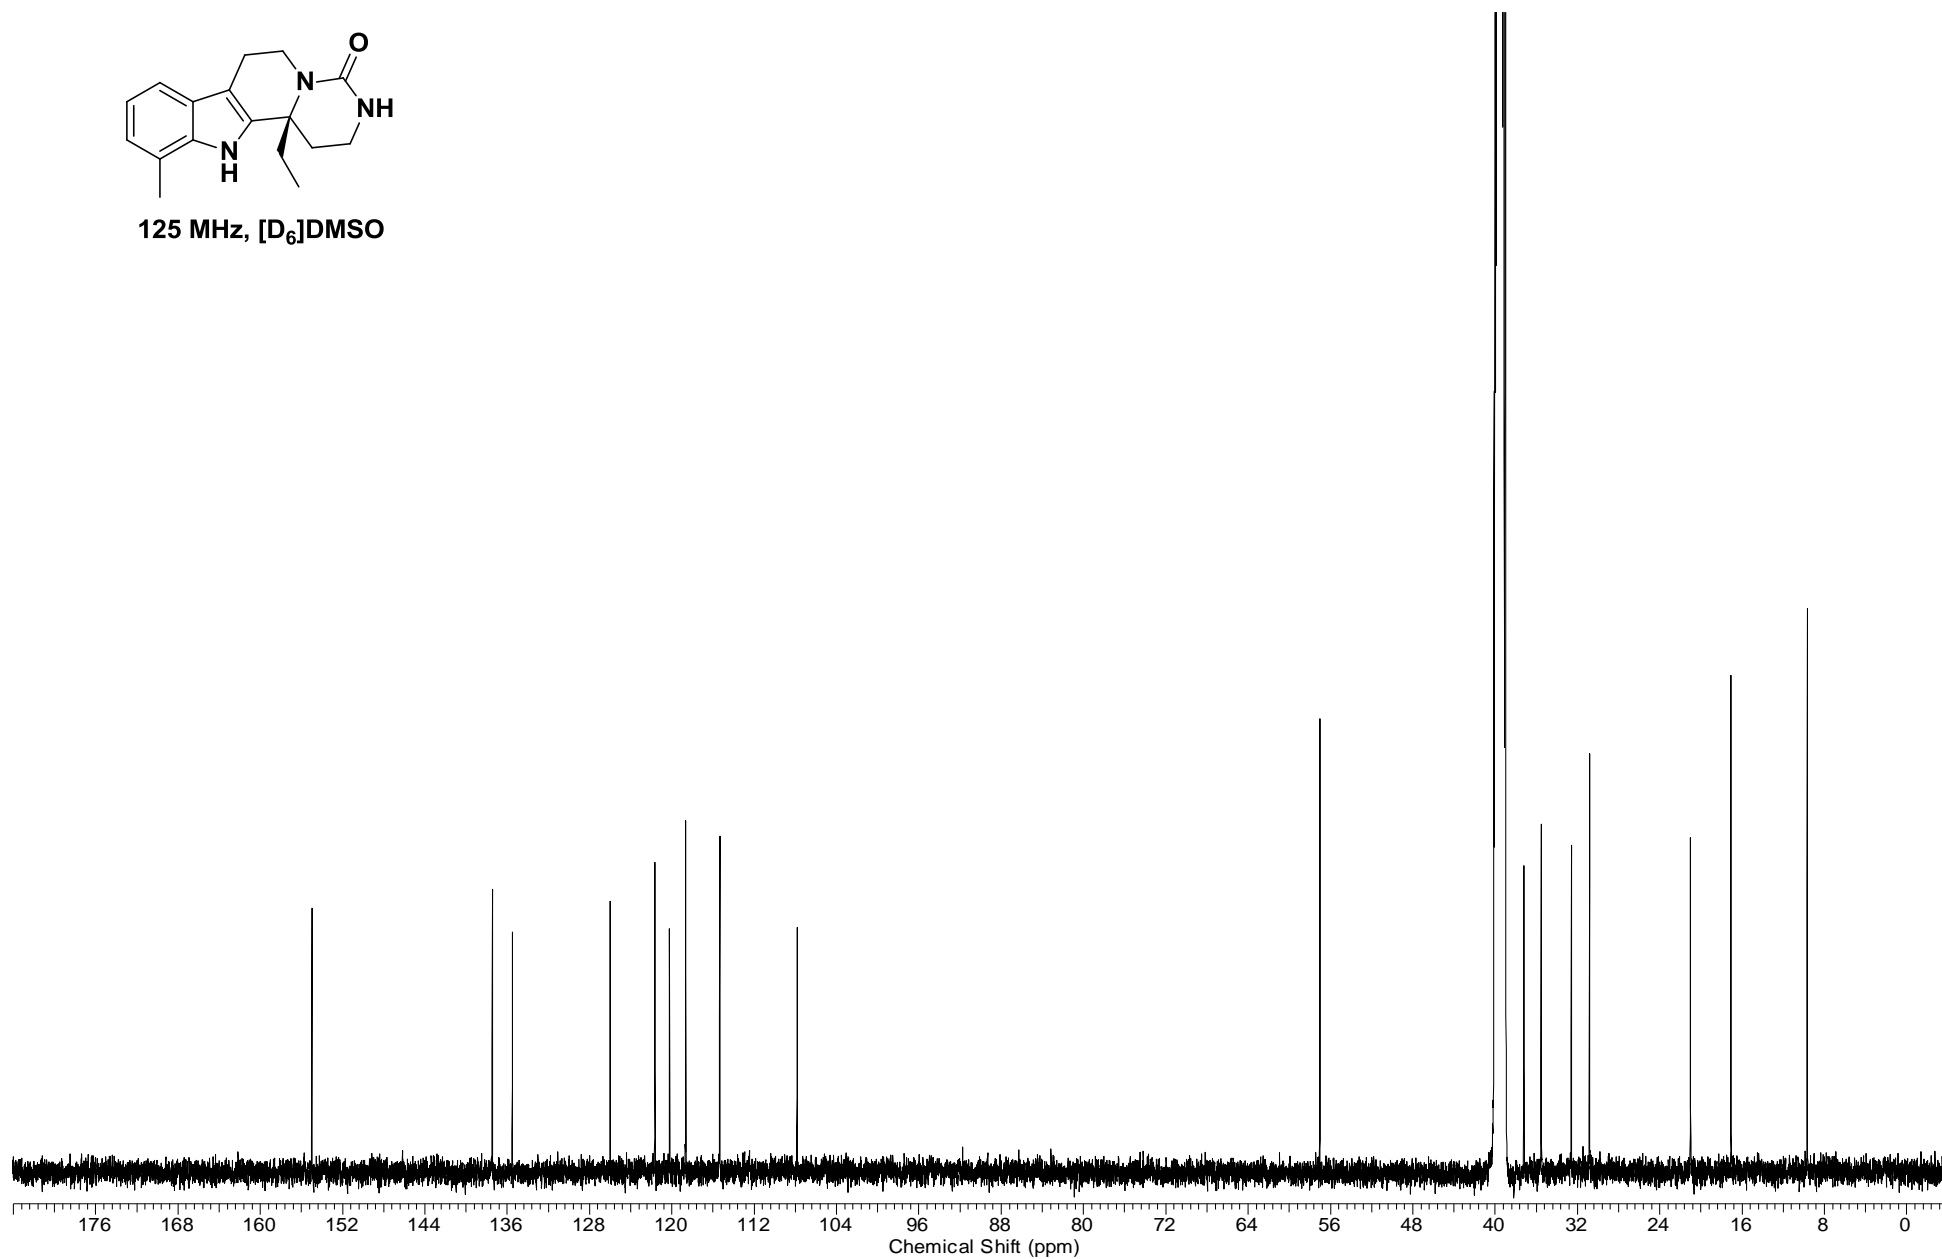

### 4.9.1 $^1\text{H}$ NMR of compound 9i

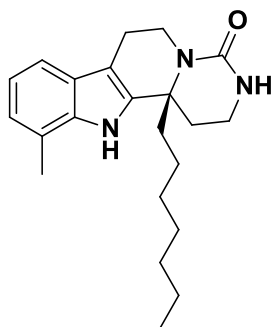

500 MHz,  $[\text{D}_6]\text{DMSO}$

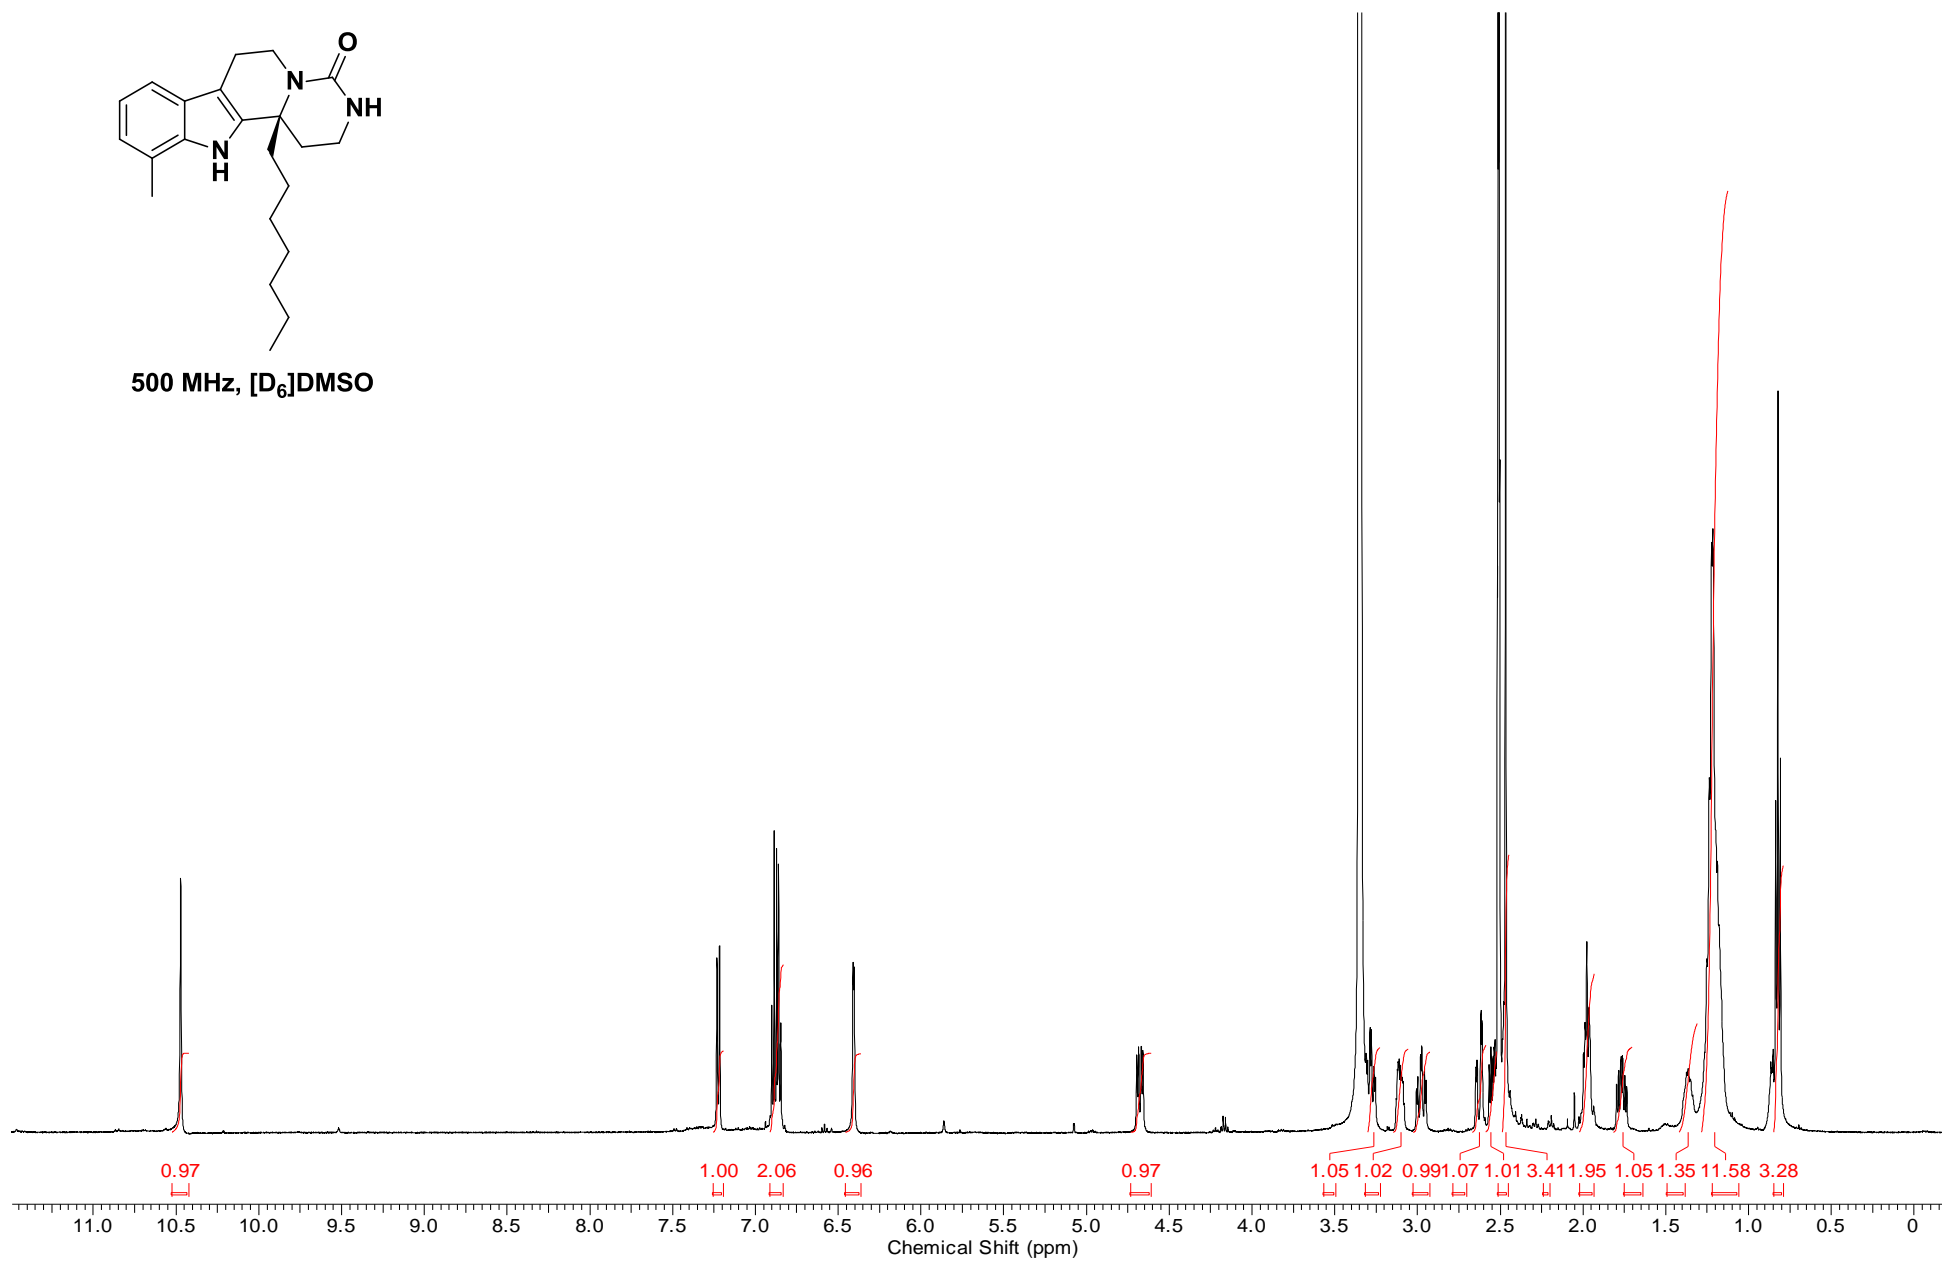

#### 4.9.2 $^{13}\text{C}$ NMR of compound 9i

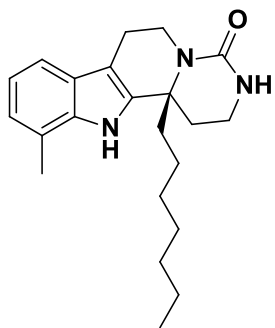

125 MHz,  $[\text{D}_6]\text{DMSO}$

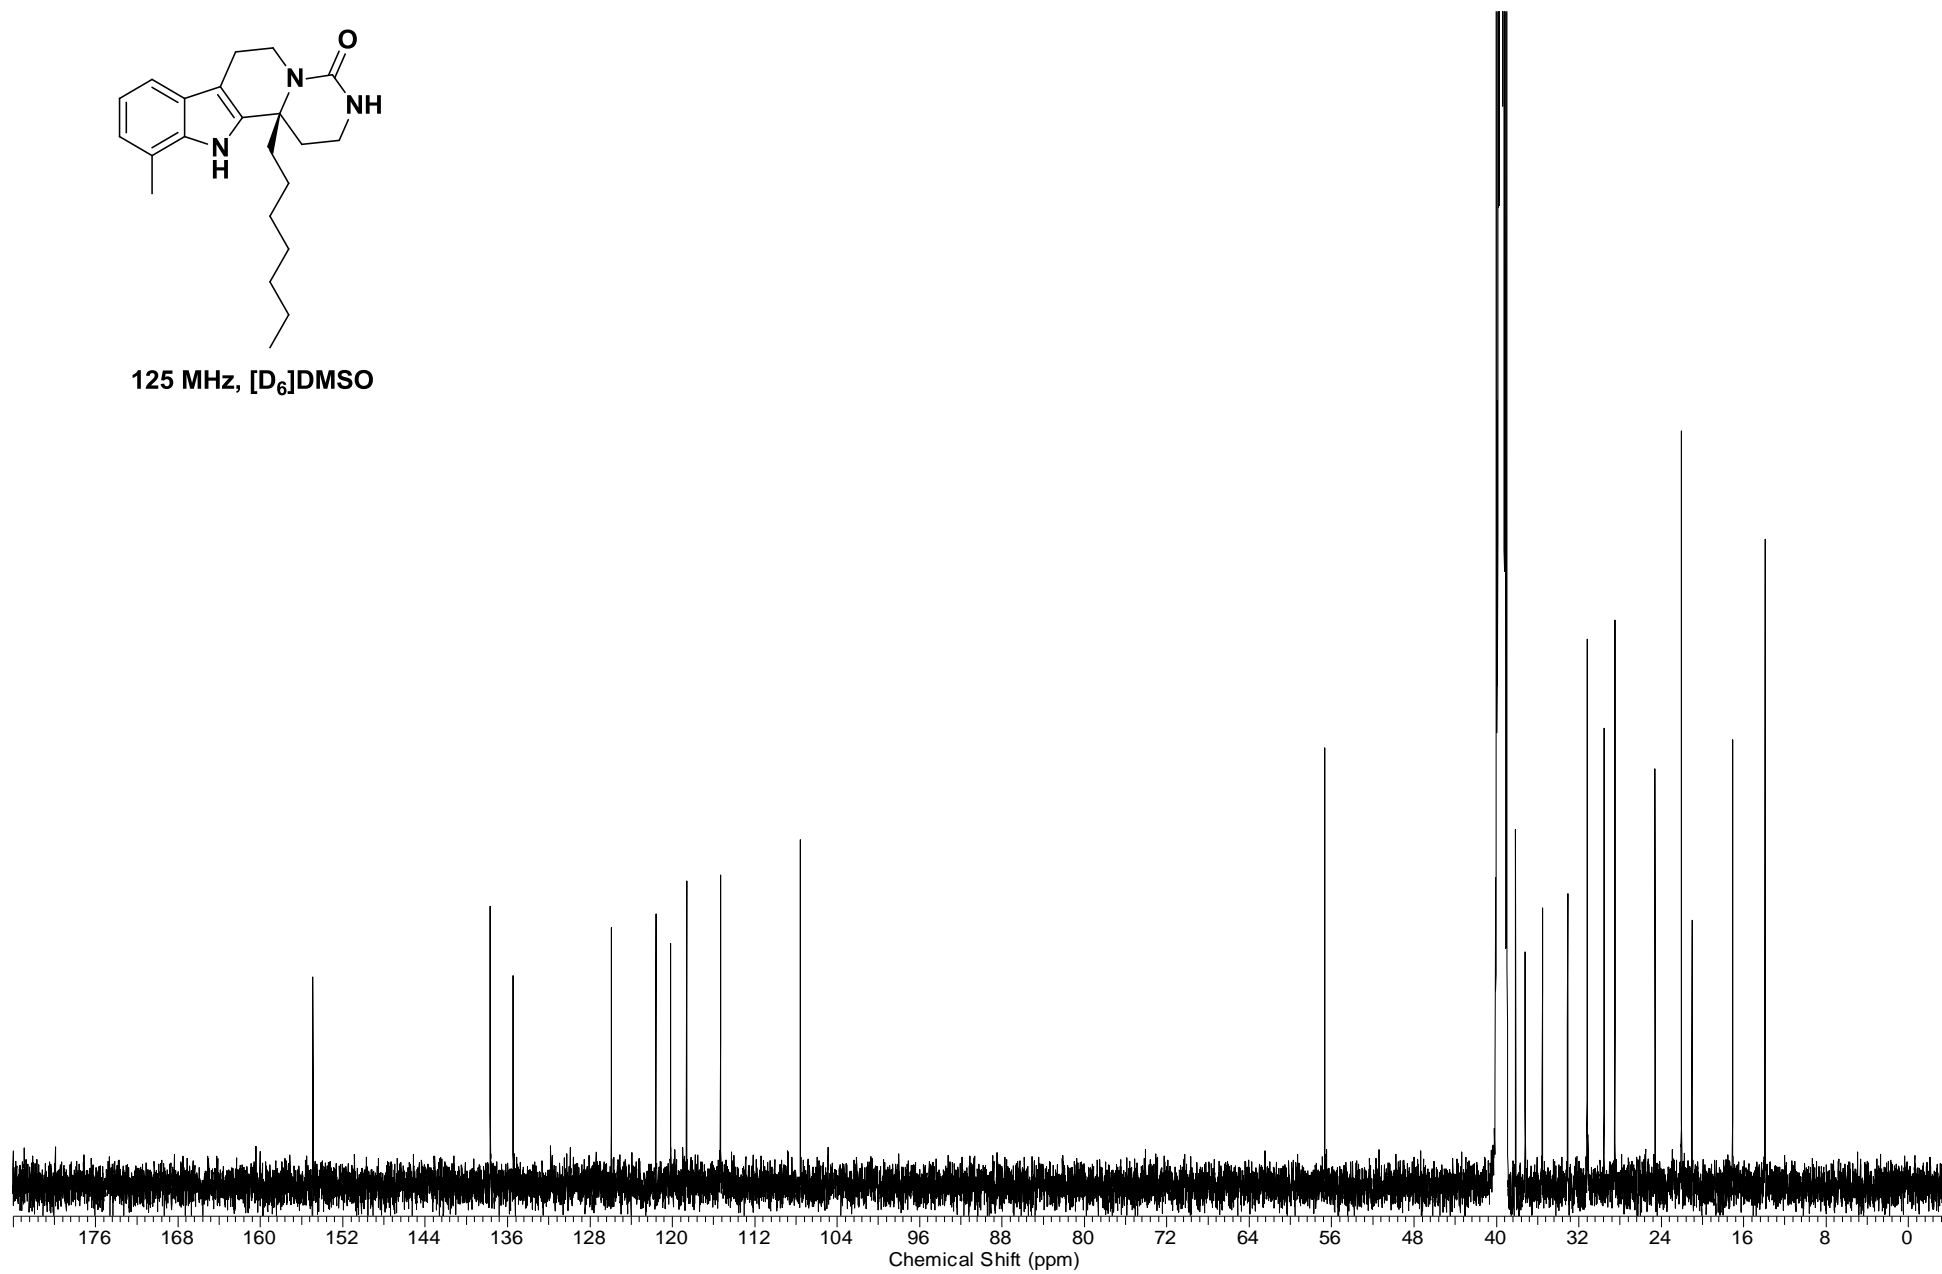

#### 4.10.1 $^1\text{H}$ NMR of compound 9j

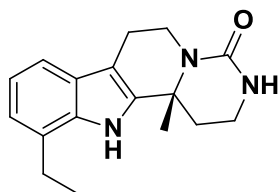

500 MHz,  $[\text{D}_6]\text{DMSO}$

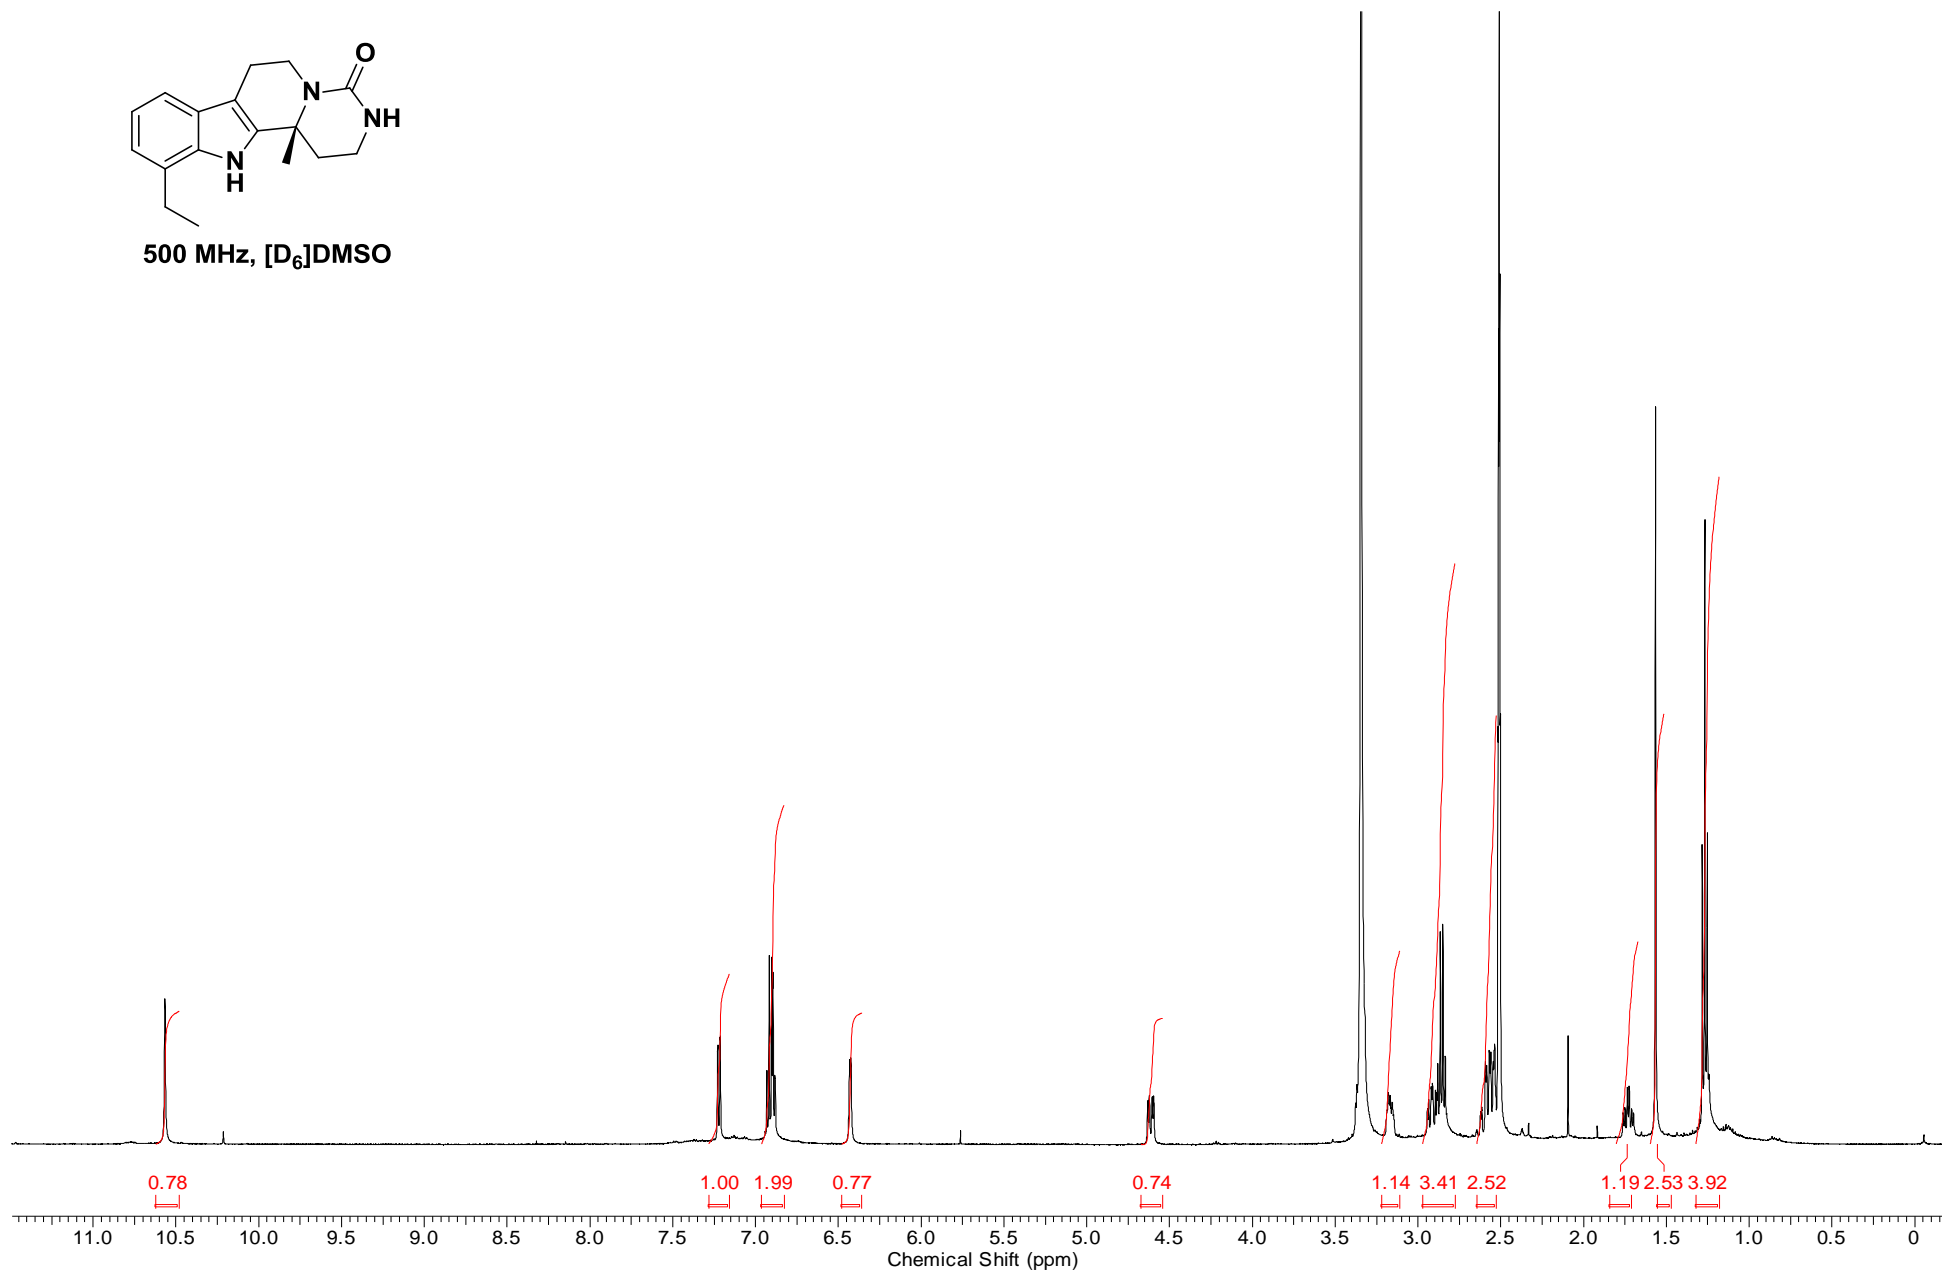

#### 4.10.2 $^{13}\text{C}$ NMR of compound 9j

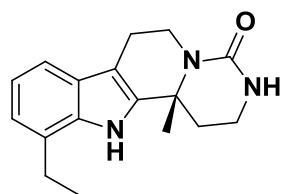

125 MHz,  $[\text{D}_6]\text{DMSO}$

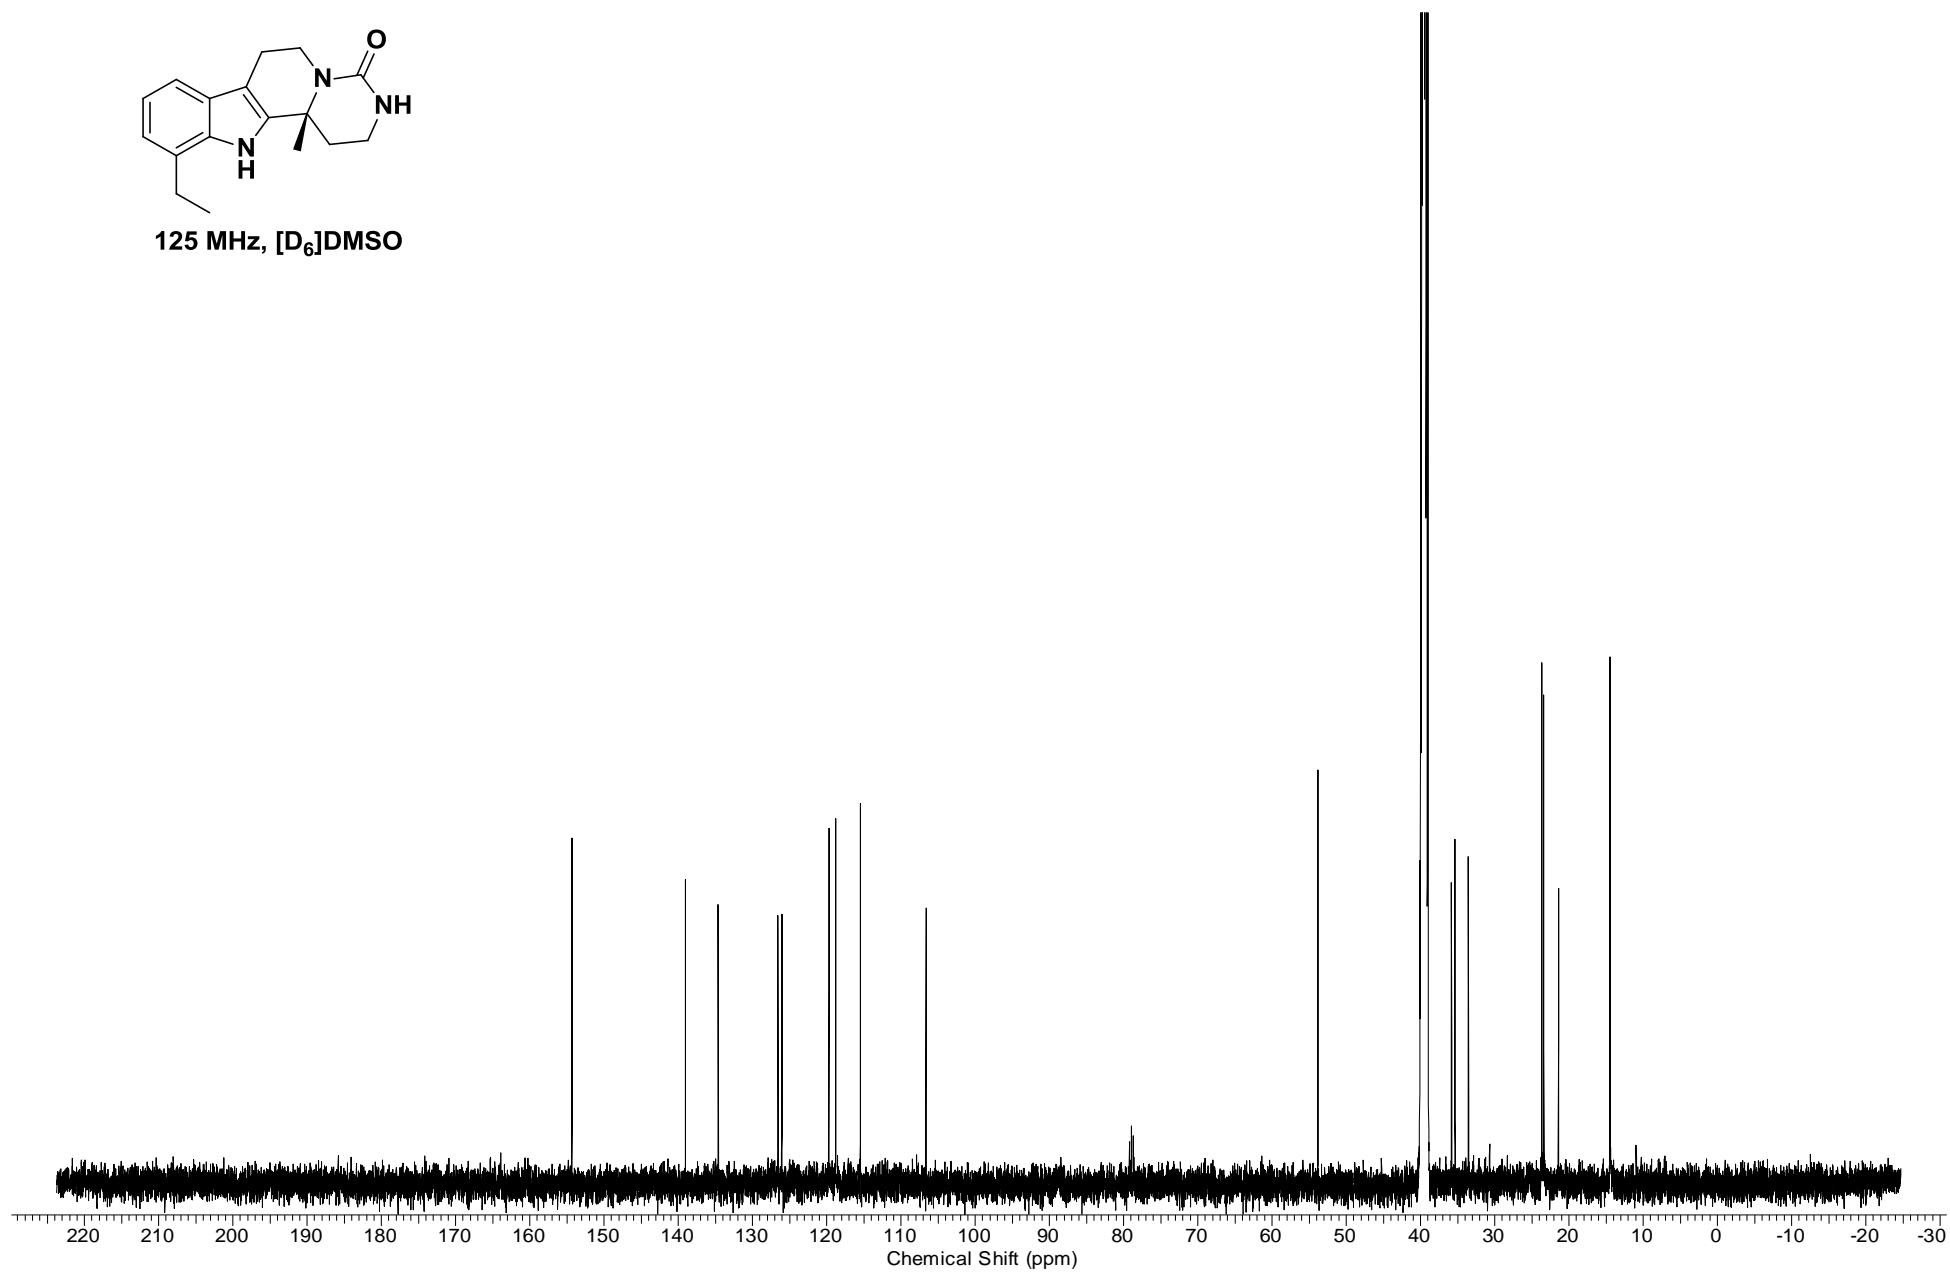



### 4.11.1 $^1\text{H}$ NMR of compound 9k

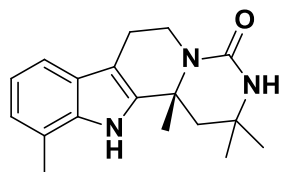

500 MHz,  $[\text{D}_6]\text{DMSO}$

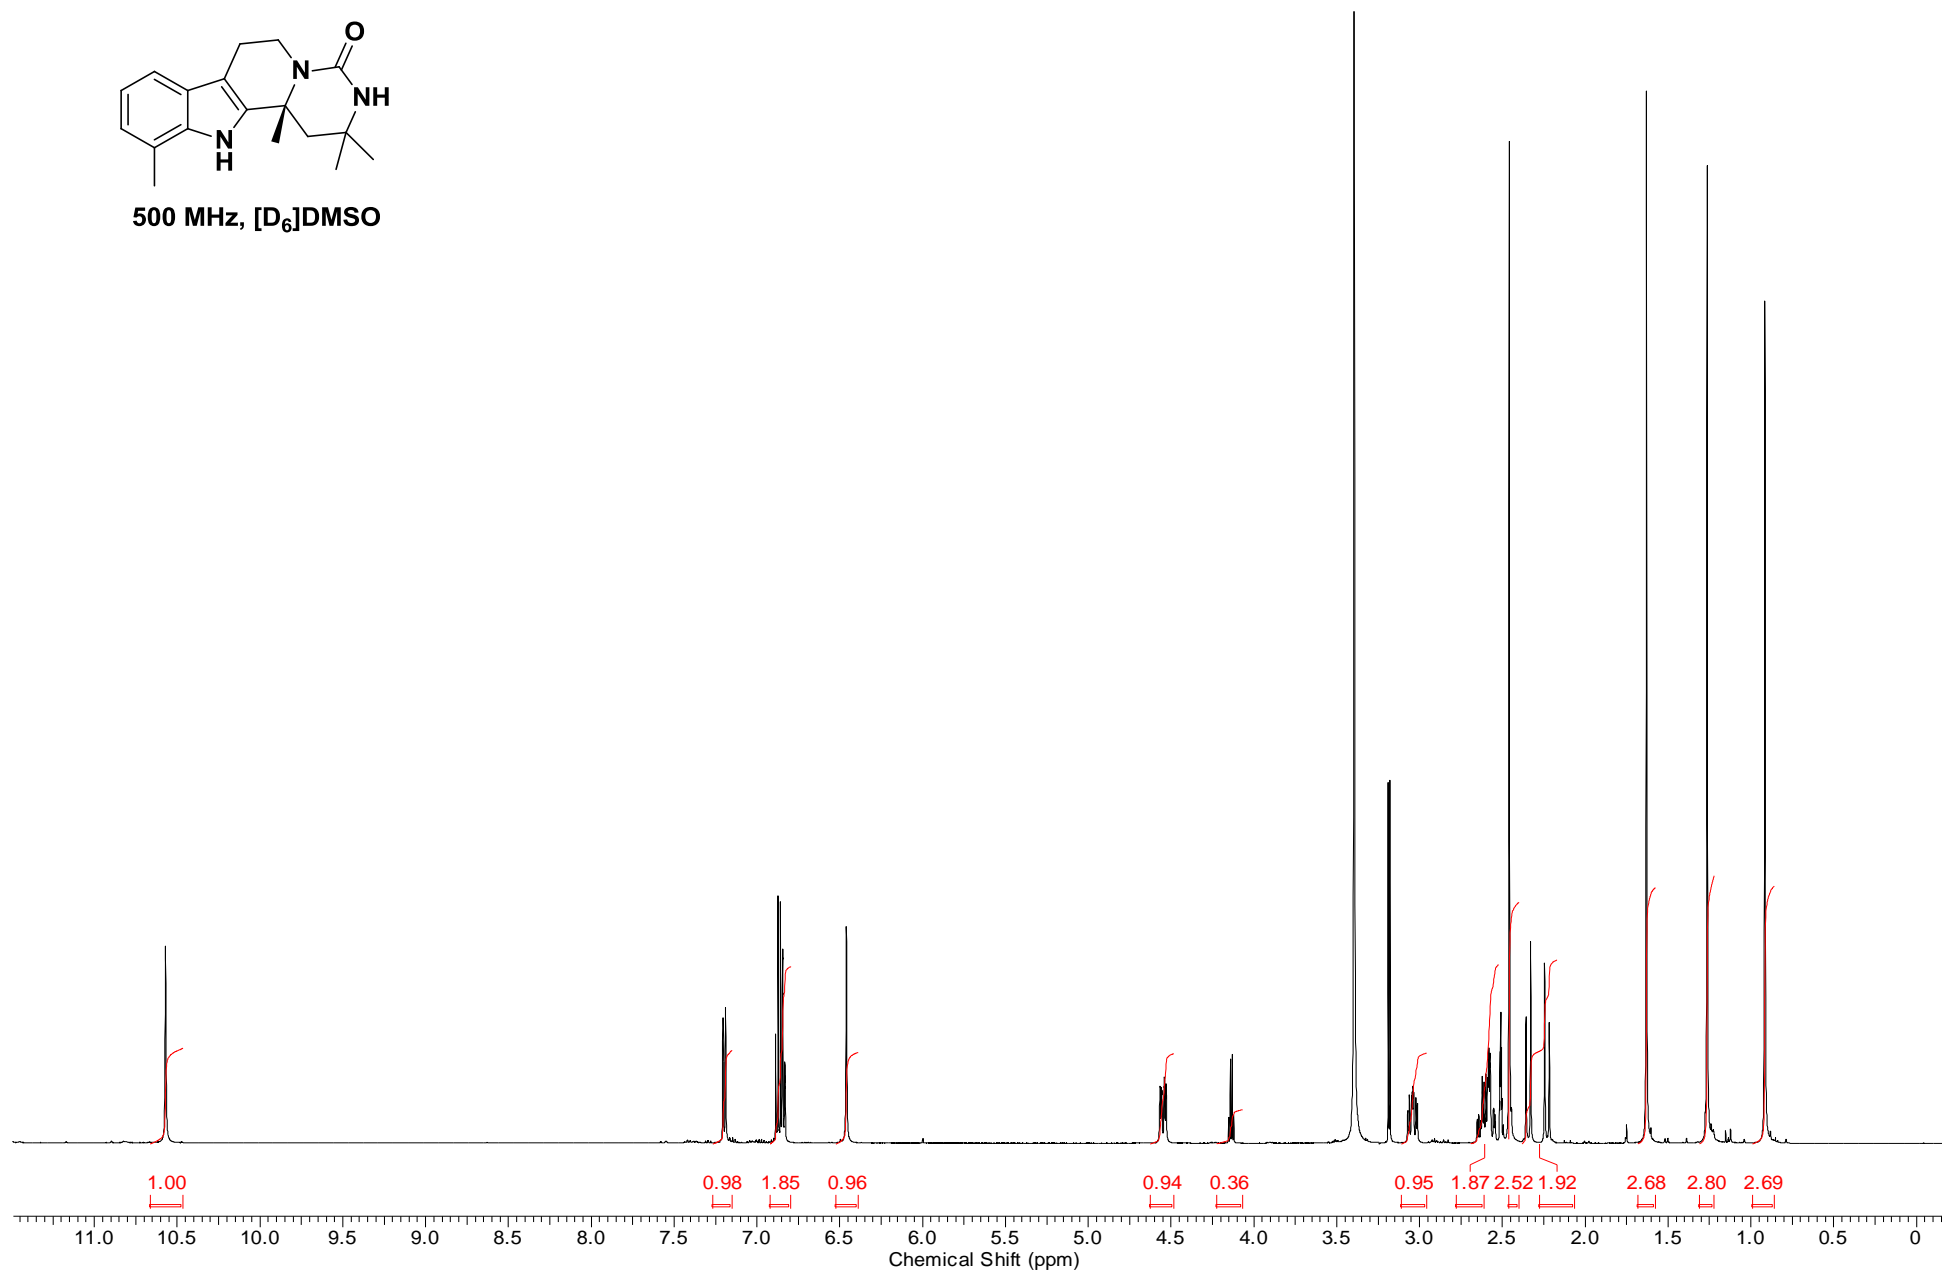

### 4.11.2 $^{13}\text{C}$ NMR of compound 9k

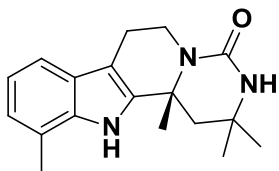

125 MHz,  $[\text{D}_6]\text{DMSO}$

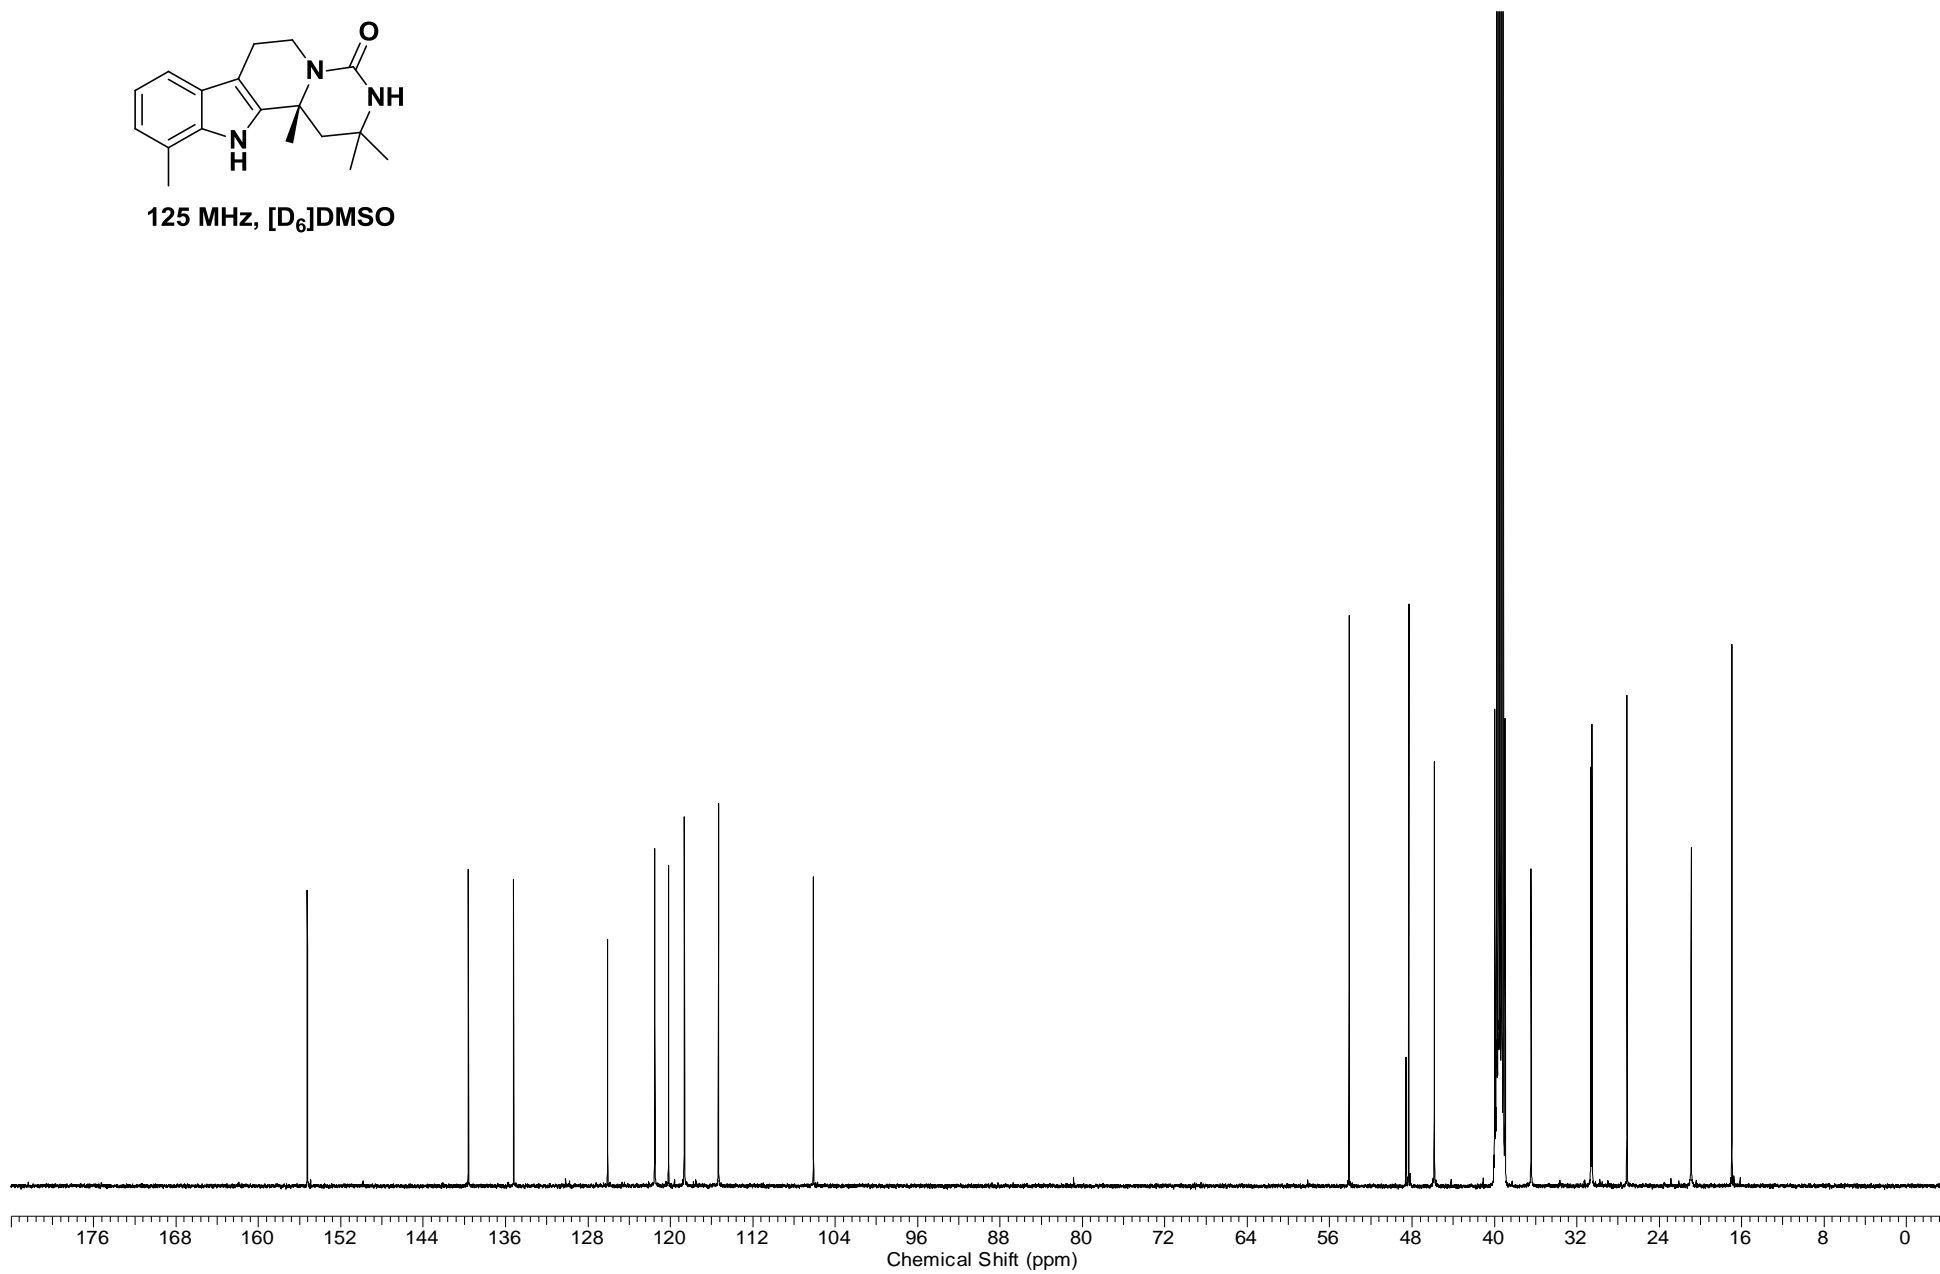

### 4.12.1 $^1\text{H}$ NMR of compound 9l

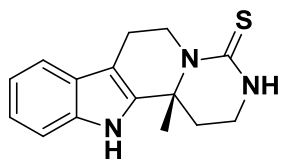

500 MHz,  $[\text{D}_6]\text{DMSO}$

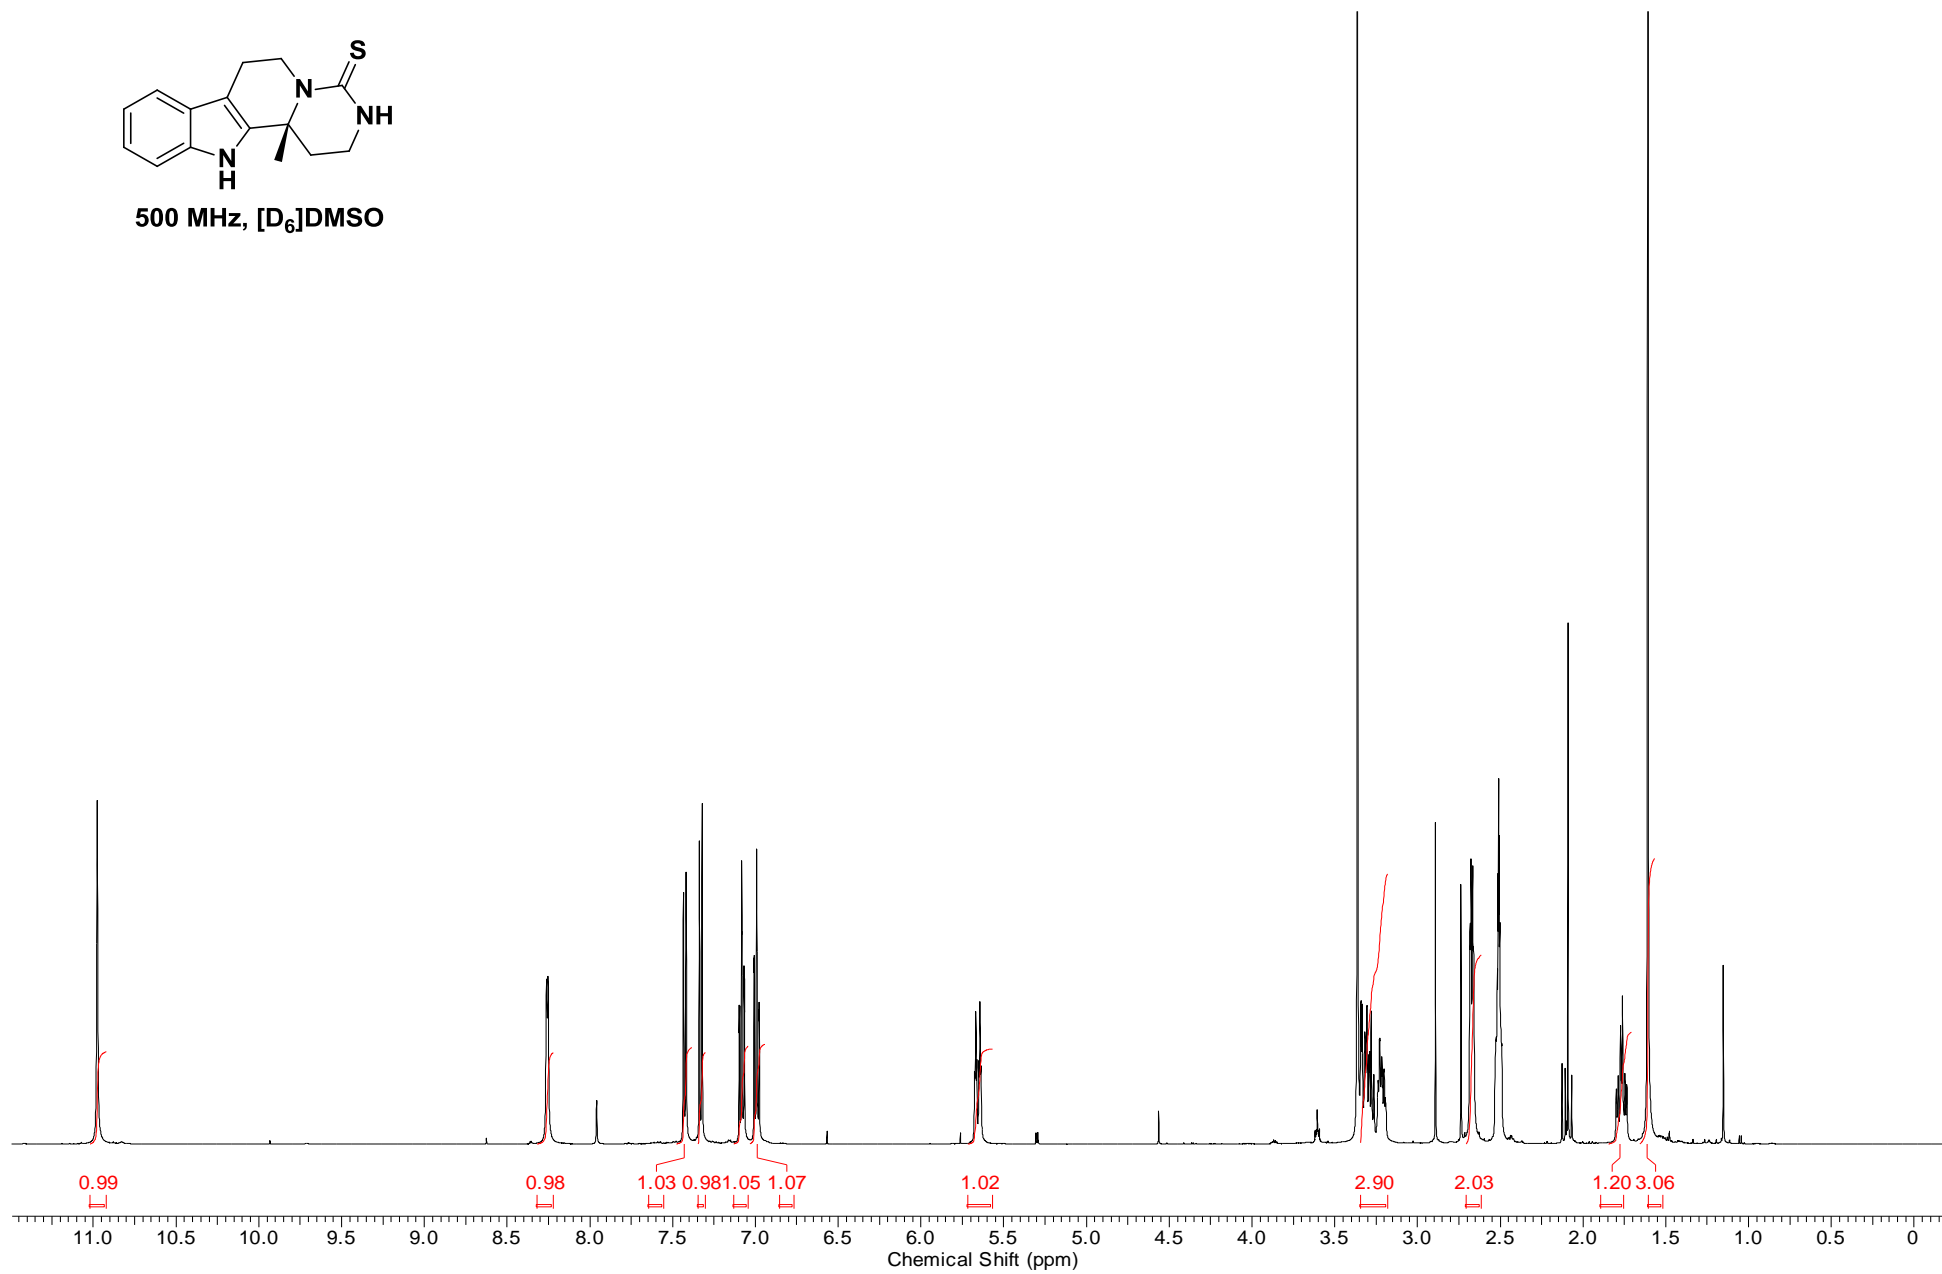

### 4.12.2 $^{13}\text{C}$ NMR of compound 9l

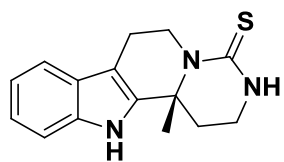

125 MHz,  $[\text{D}_6]\text{DMSO}$

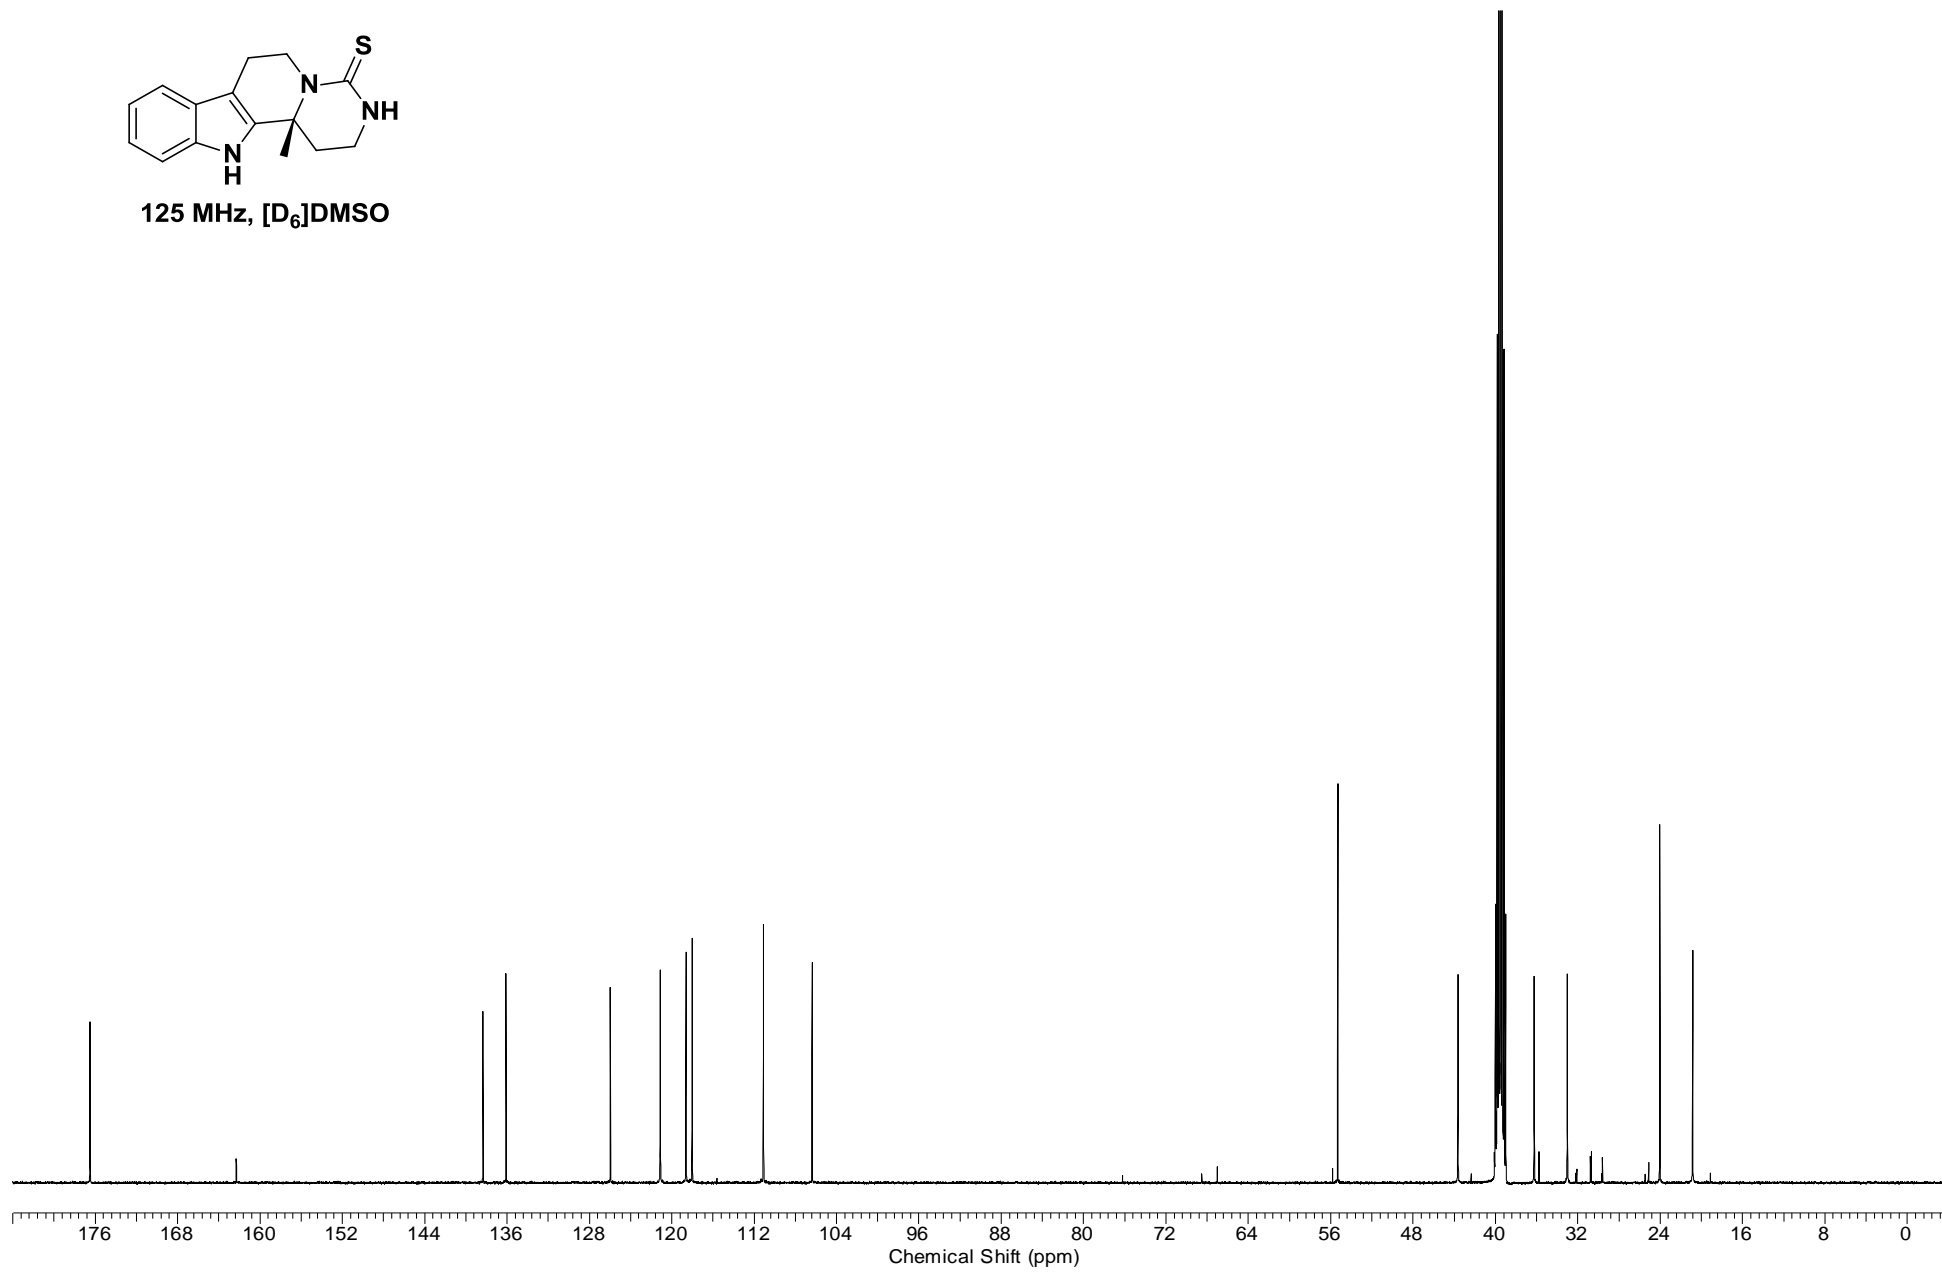

### 4.13.1 $^1\text{H}$ NMR of compound 9m

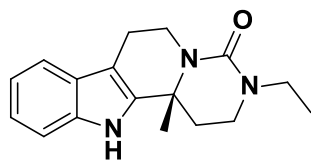

500 MHz,  $[\text{D}_6]\text{DMSO}$

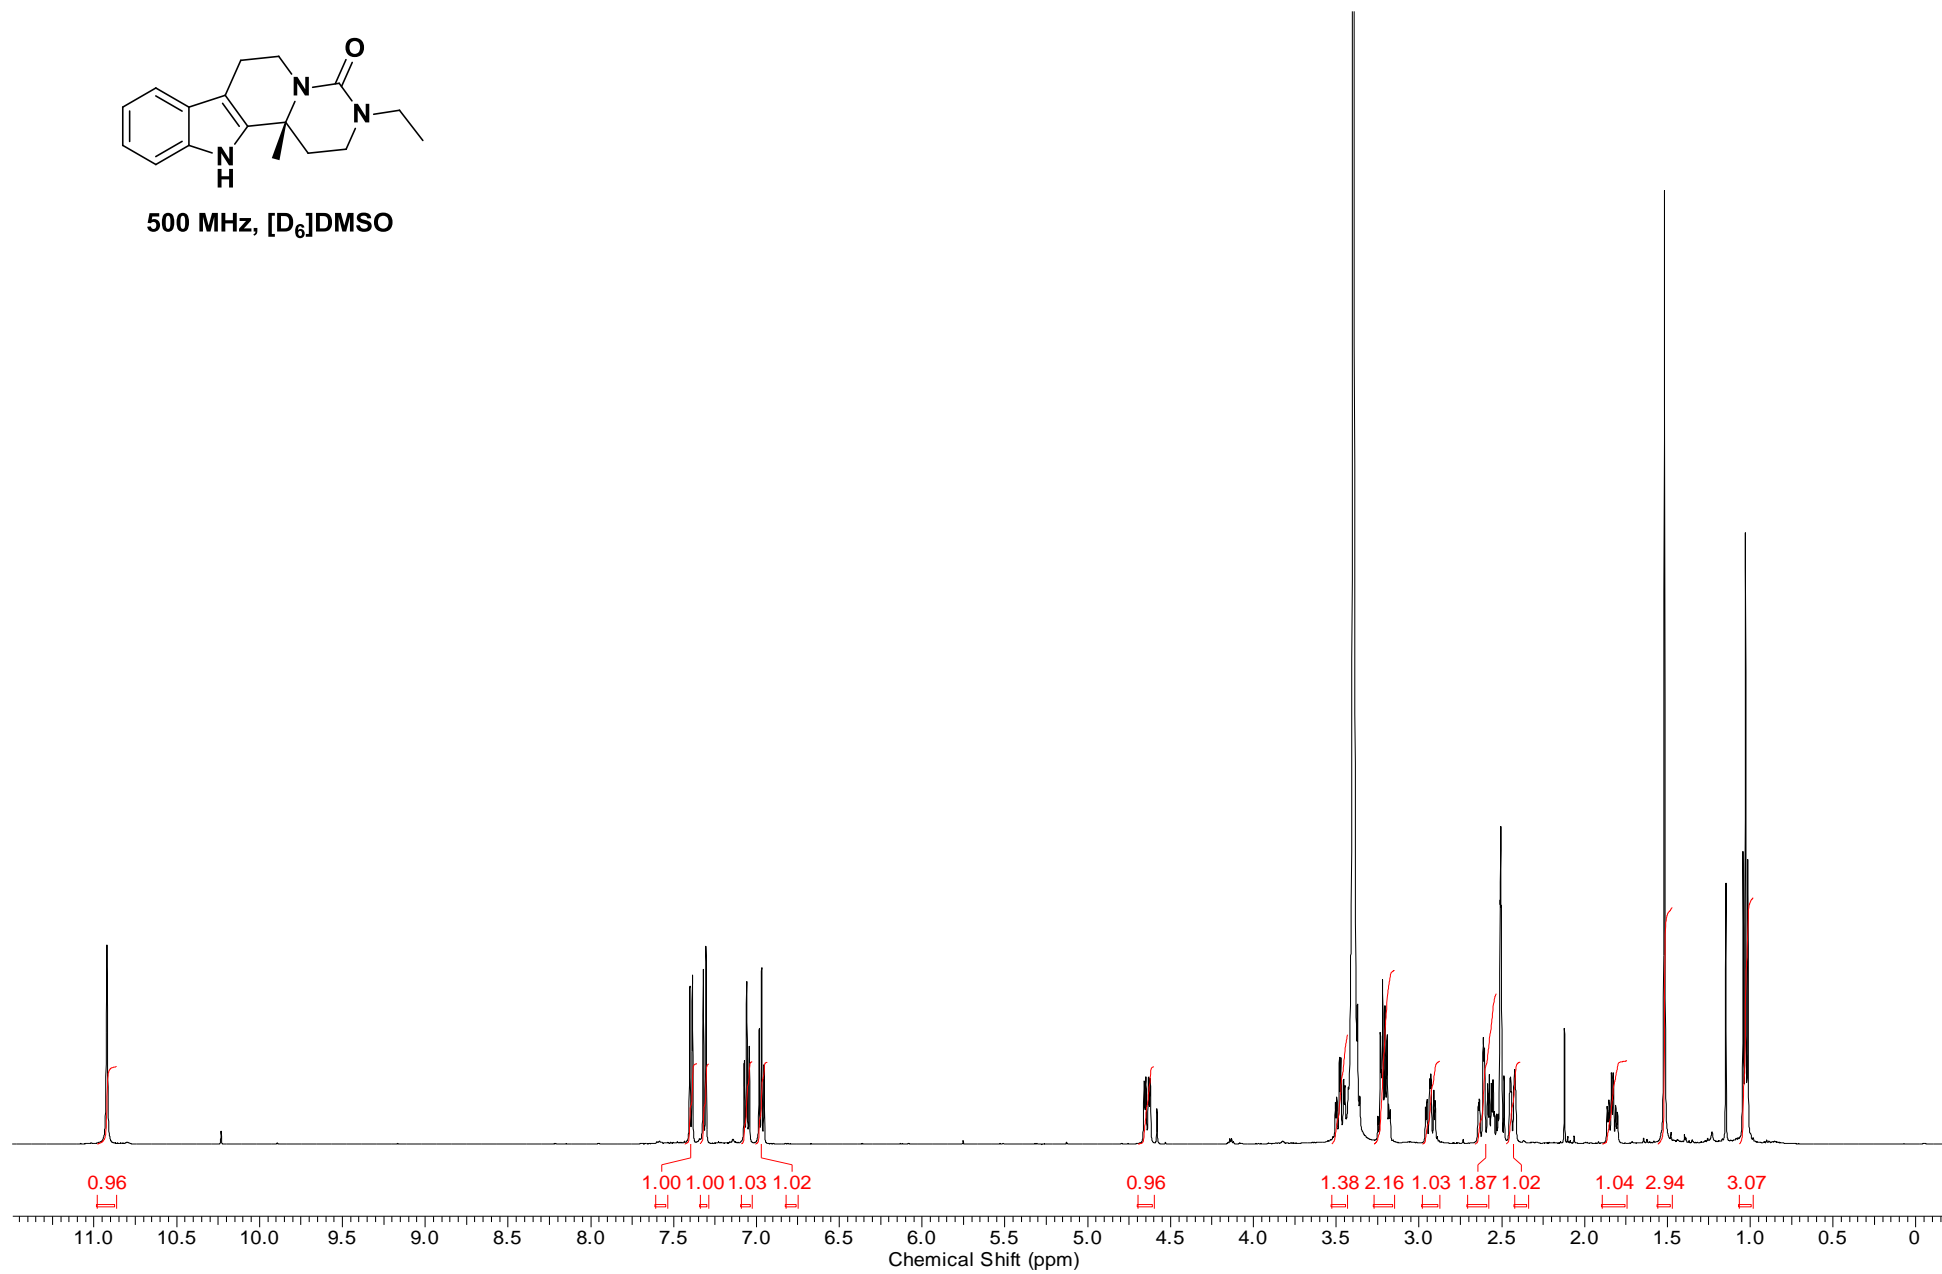

### 4.13.2 $^{13}\text{C}$ NMR of compound 9m

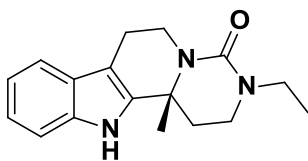

125 MHz,  $[\text{D}_6]\text{DMSO}$

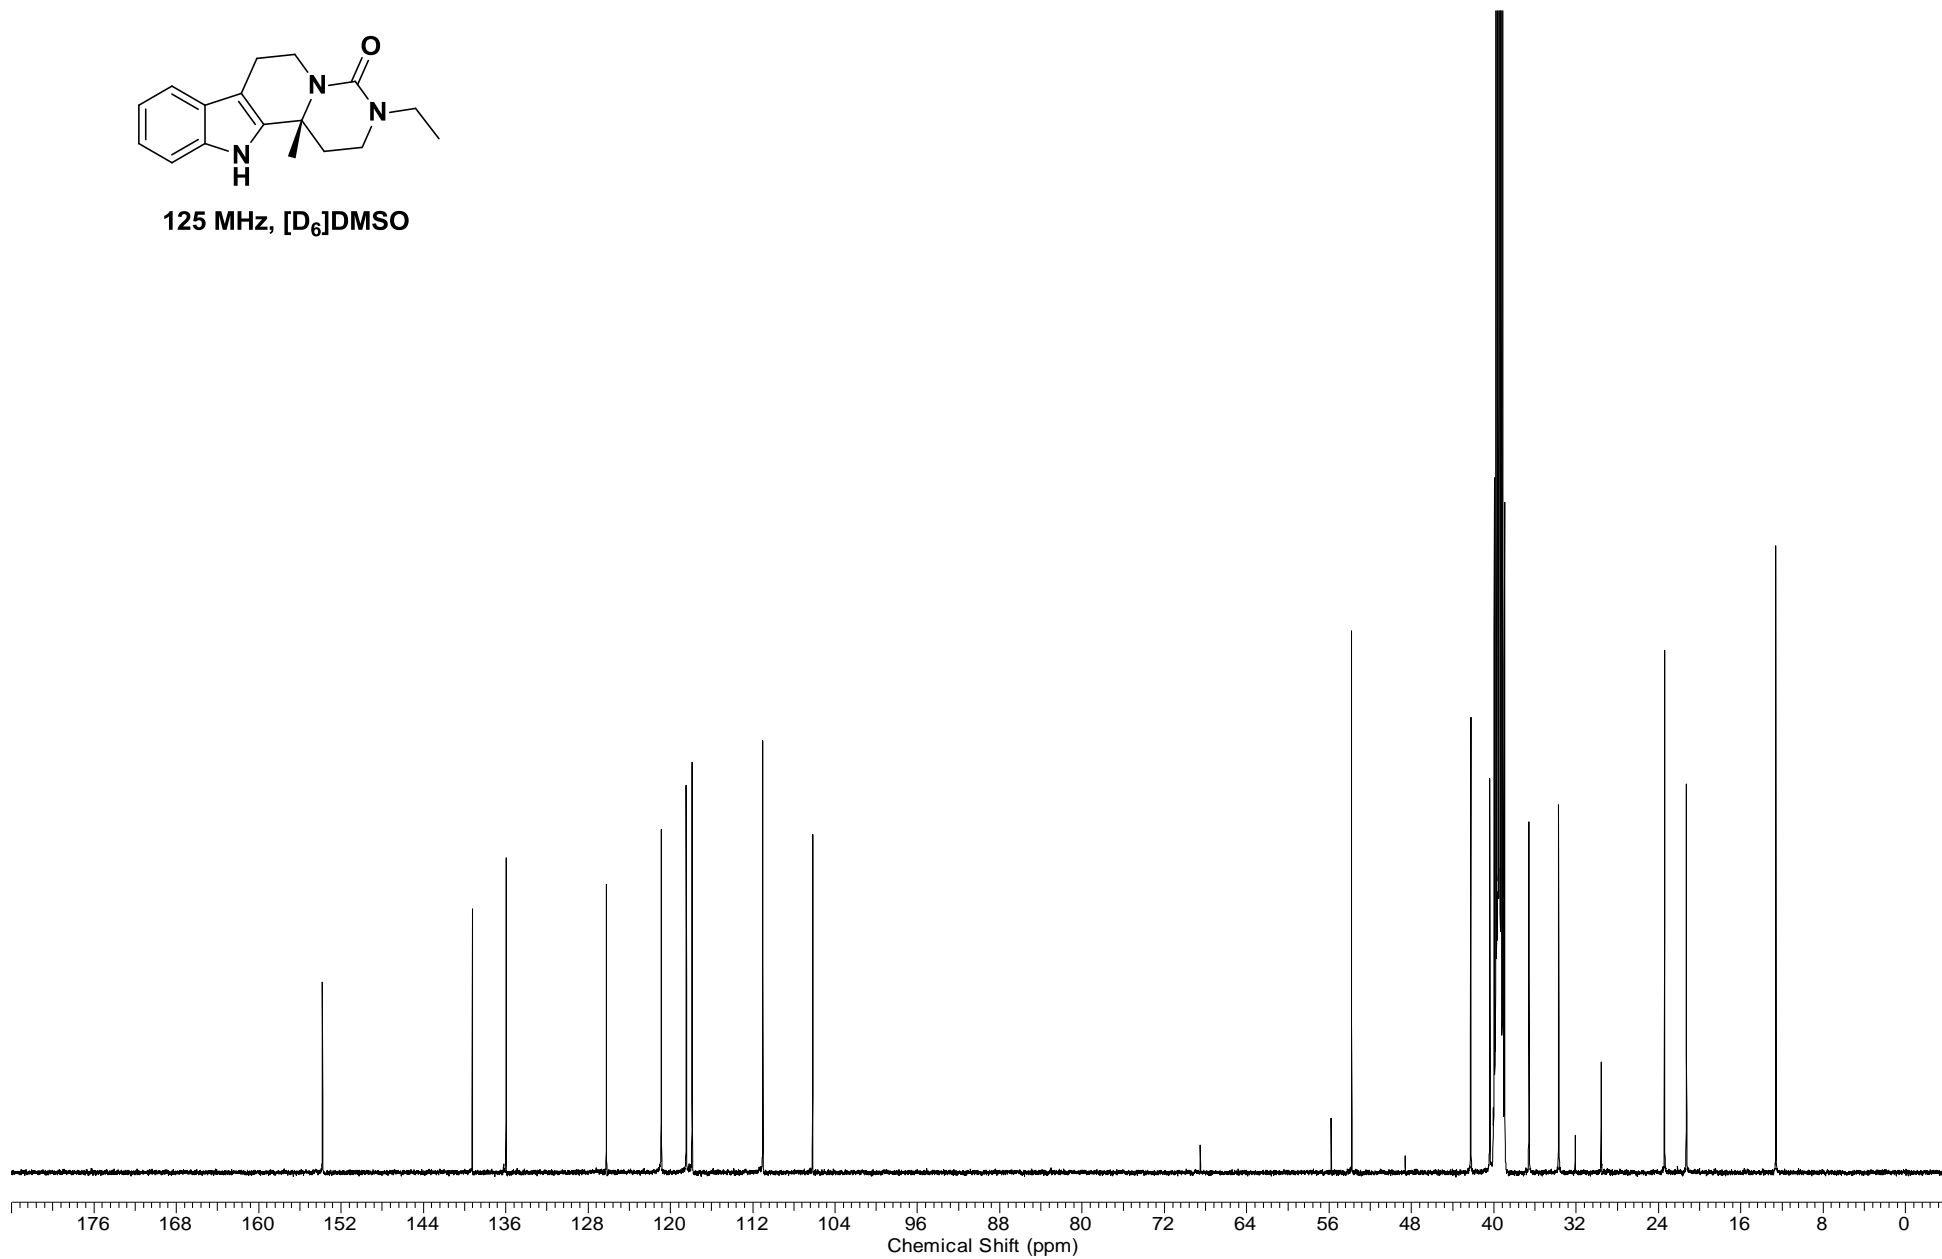

#### 4.14.1 $^1\text{H}$ NMR of compound 9n

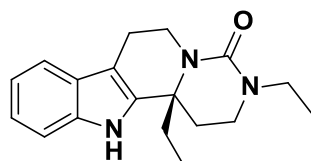

500 MHz,  $[\text{D}_6]\text{DMSO}$

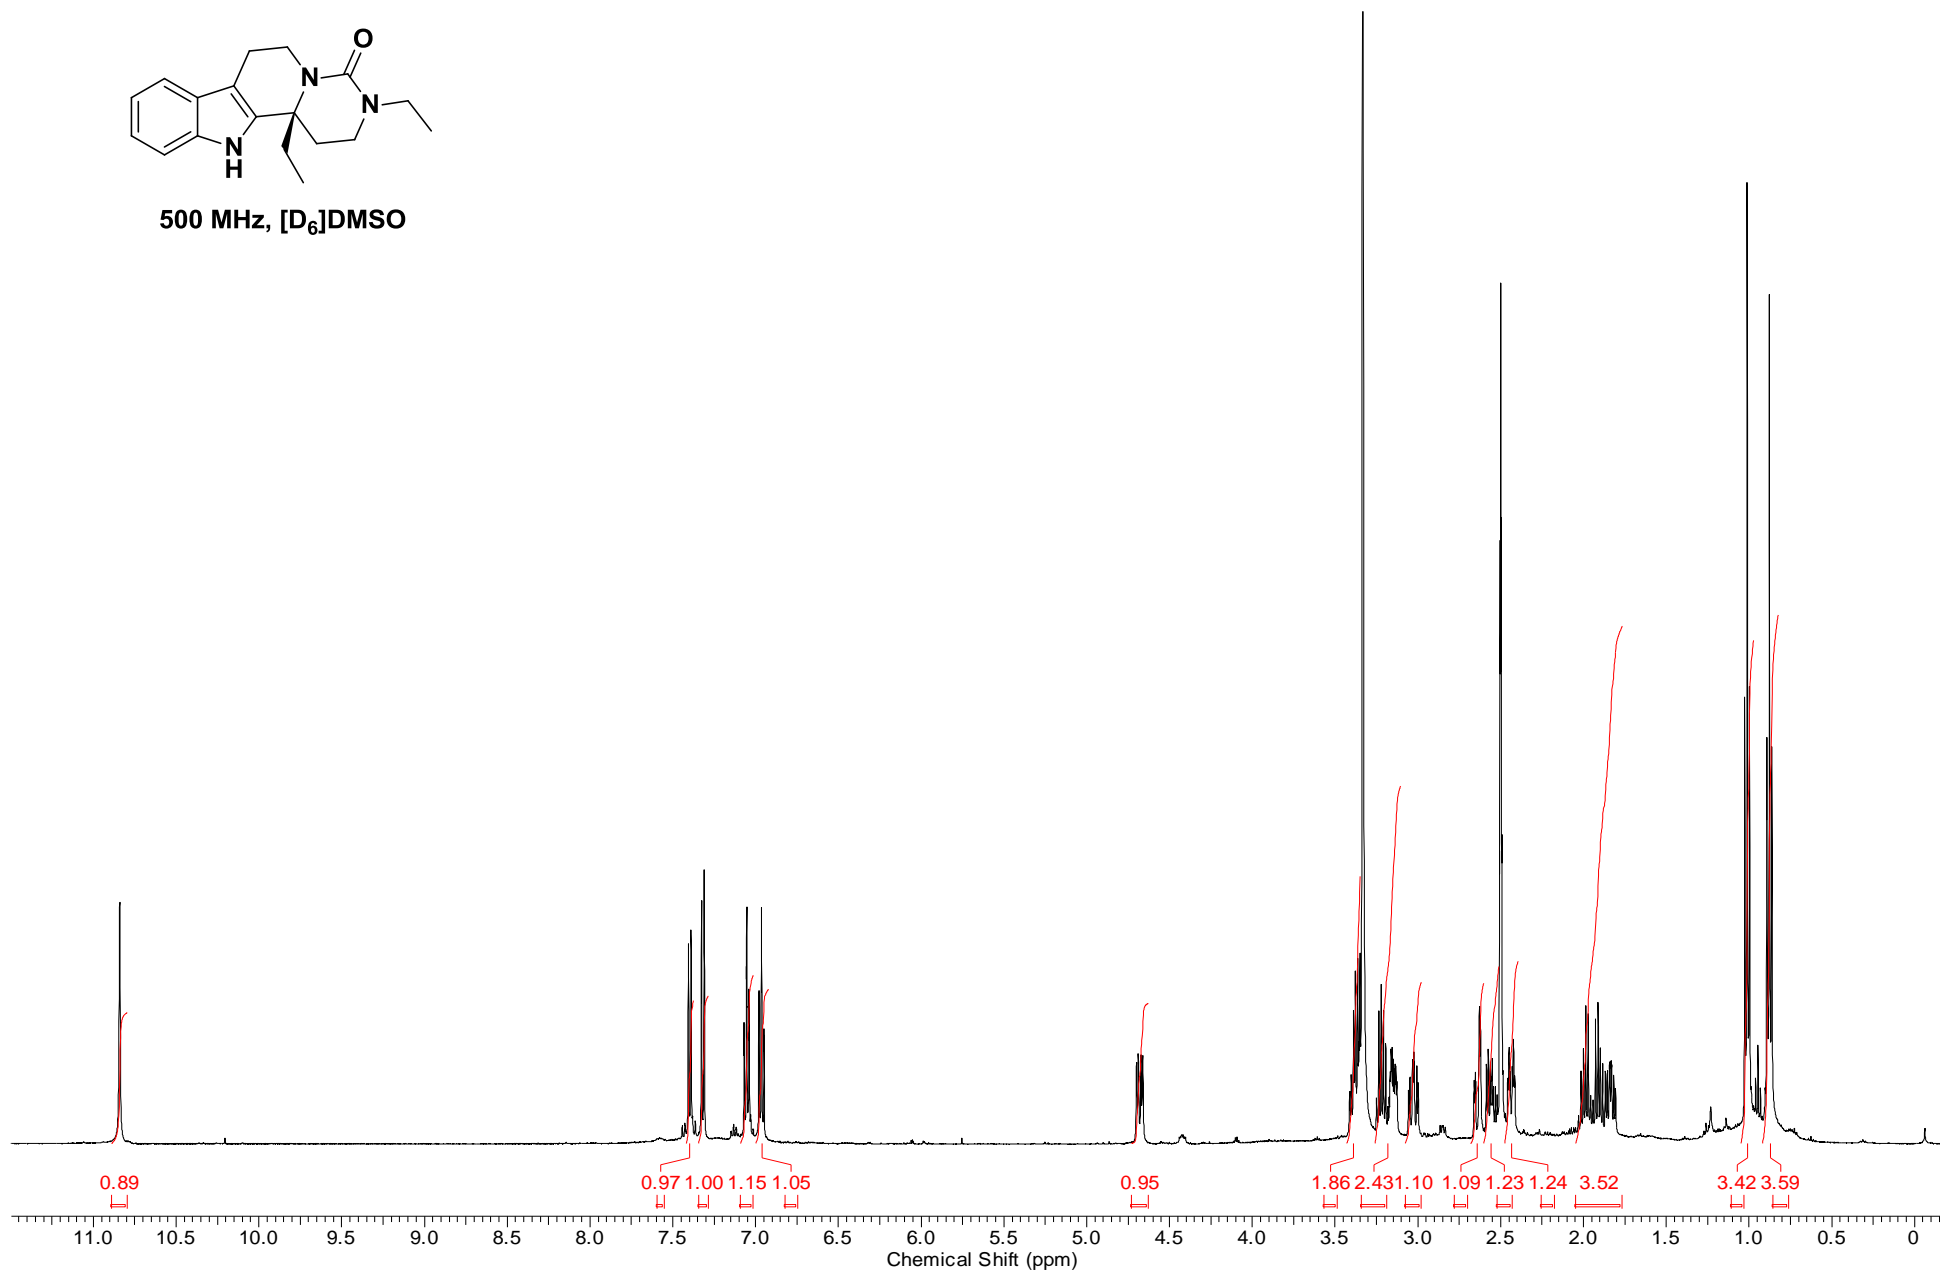

#### 4.14.2 $^{13}\text{C}$ NMR of compound 9n

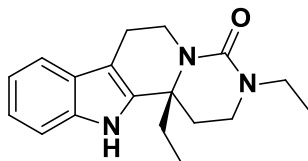

125 MHz,  $[\text{D}_6]\text{DMSO}$

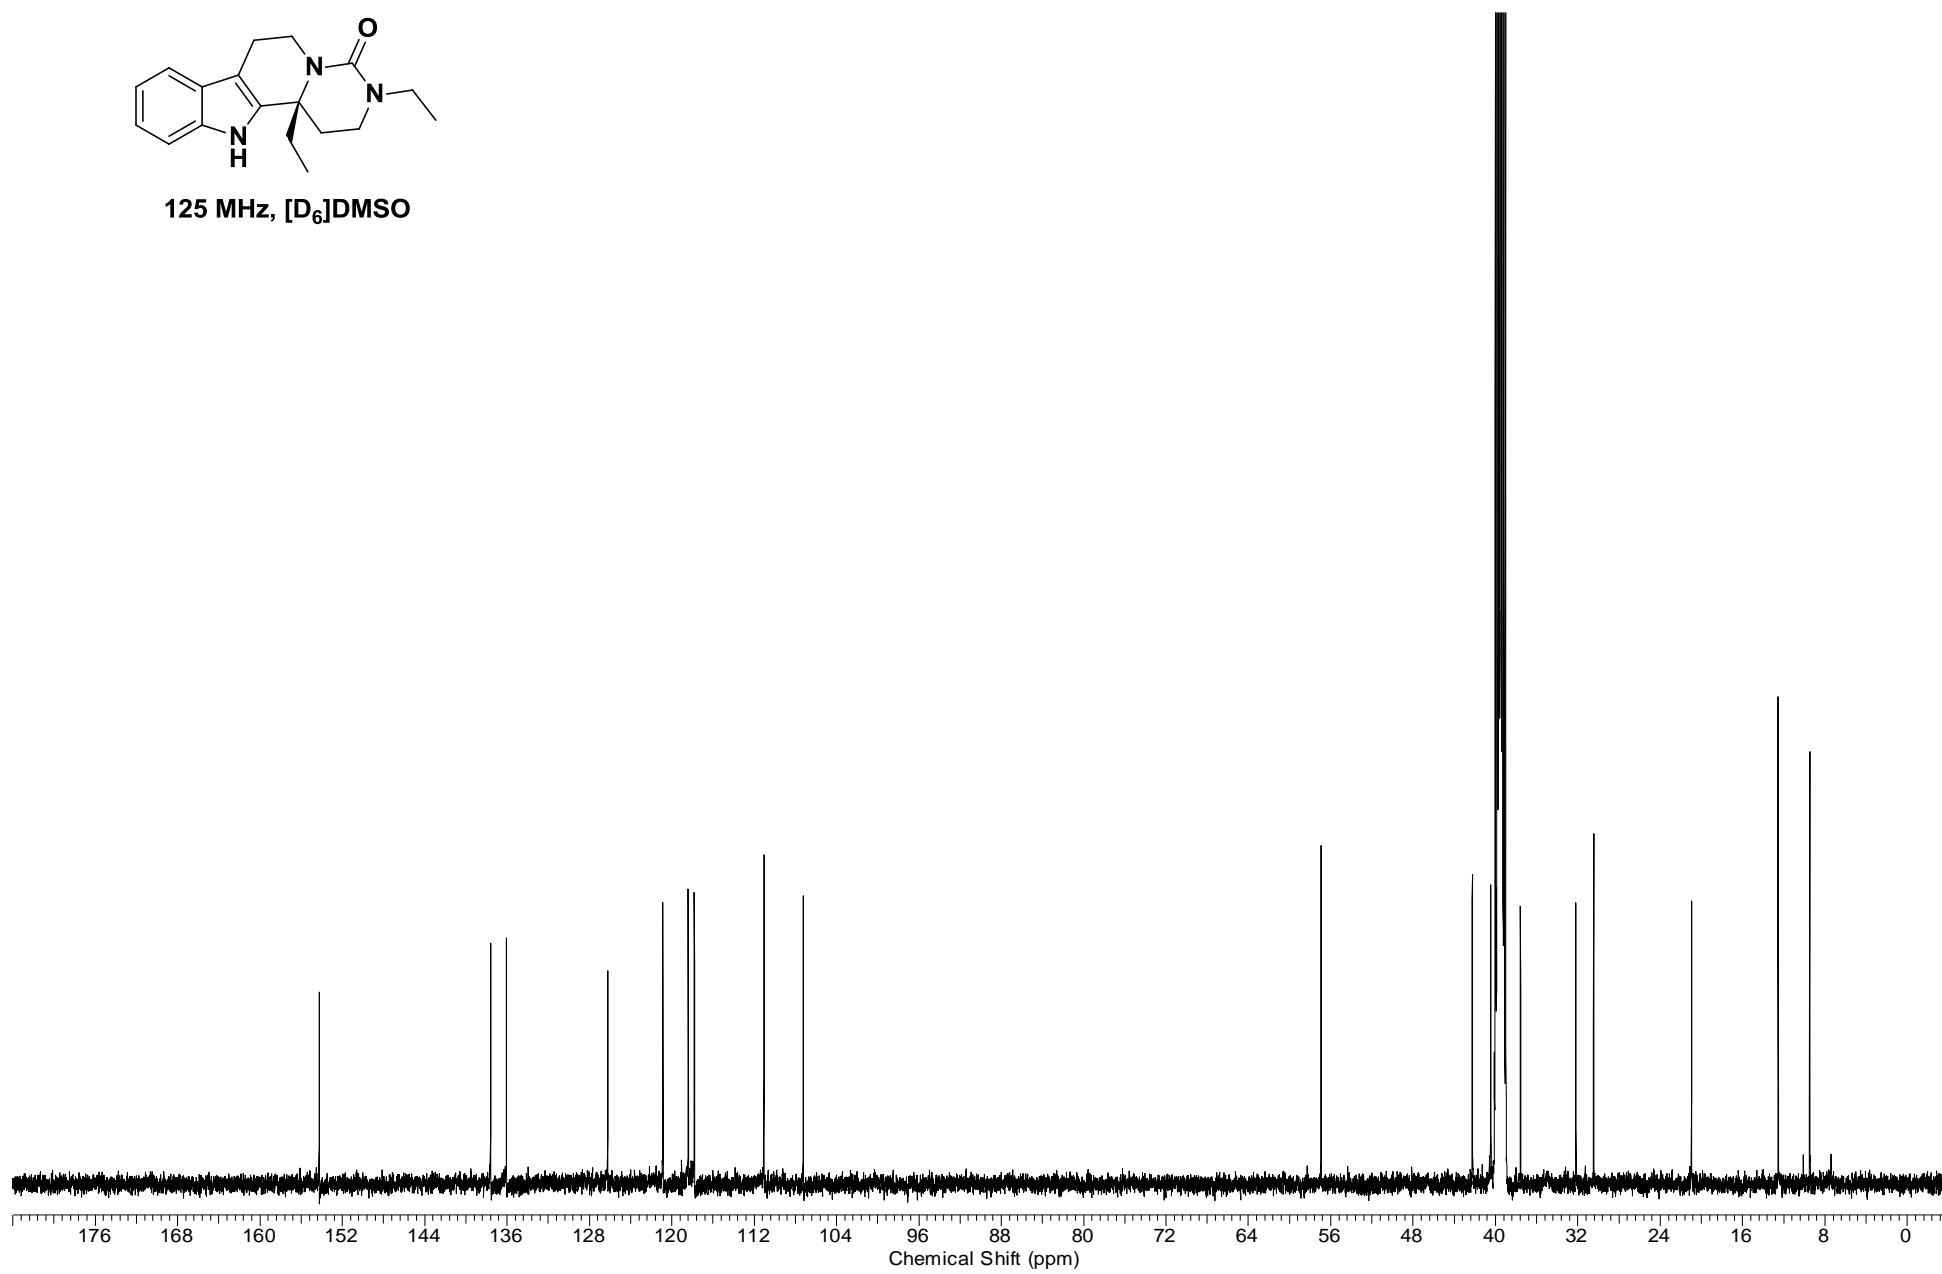



### 4.15.1 $^1\text{H}$ NMR of compound 9o

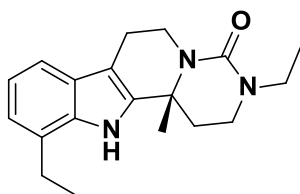

500 MHz, [D<sub>6</sub>]DMSO

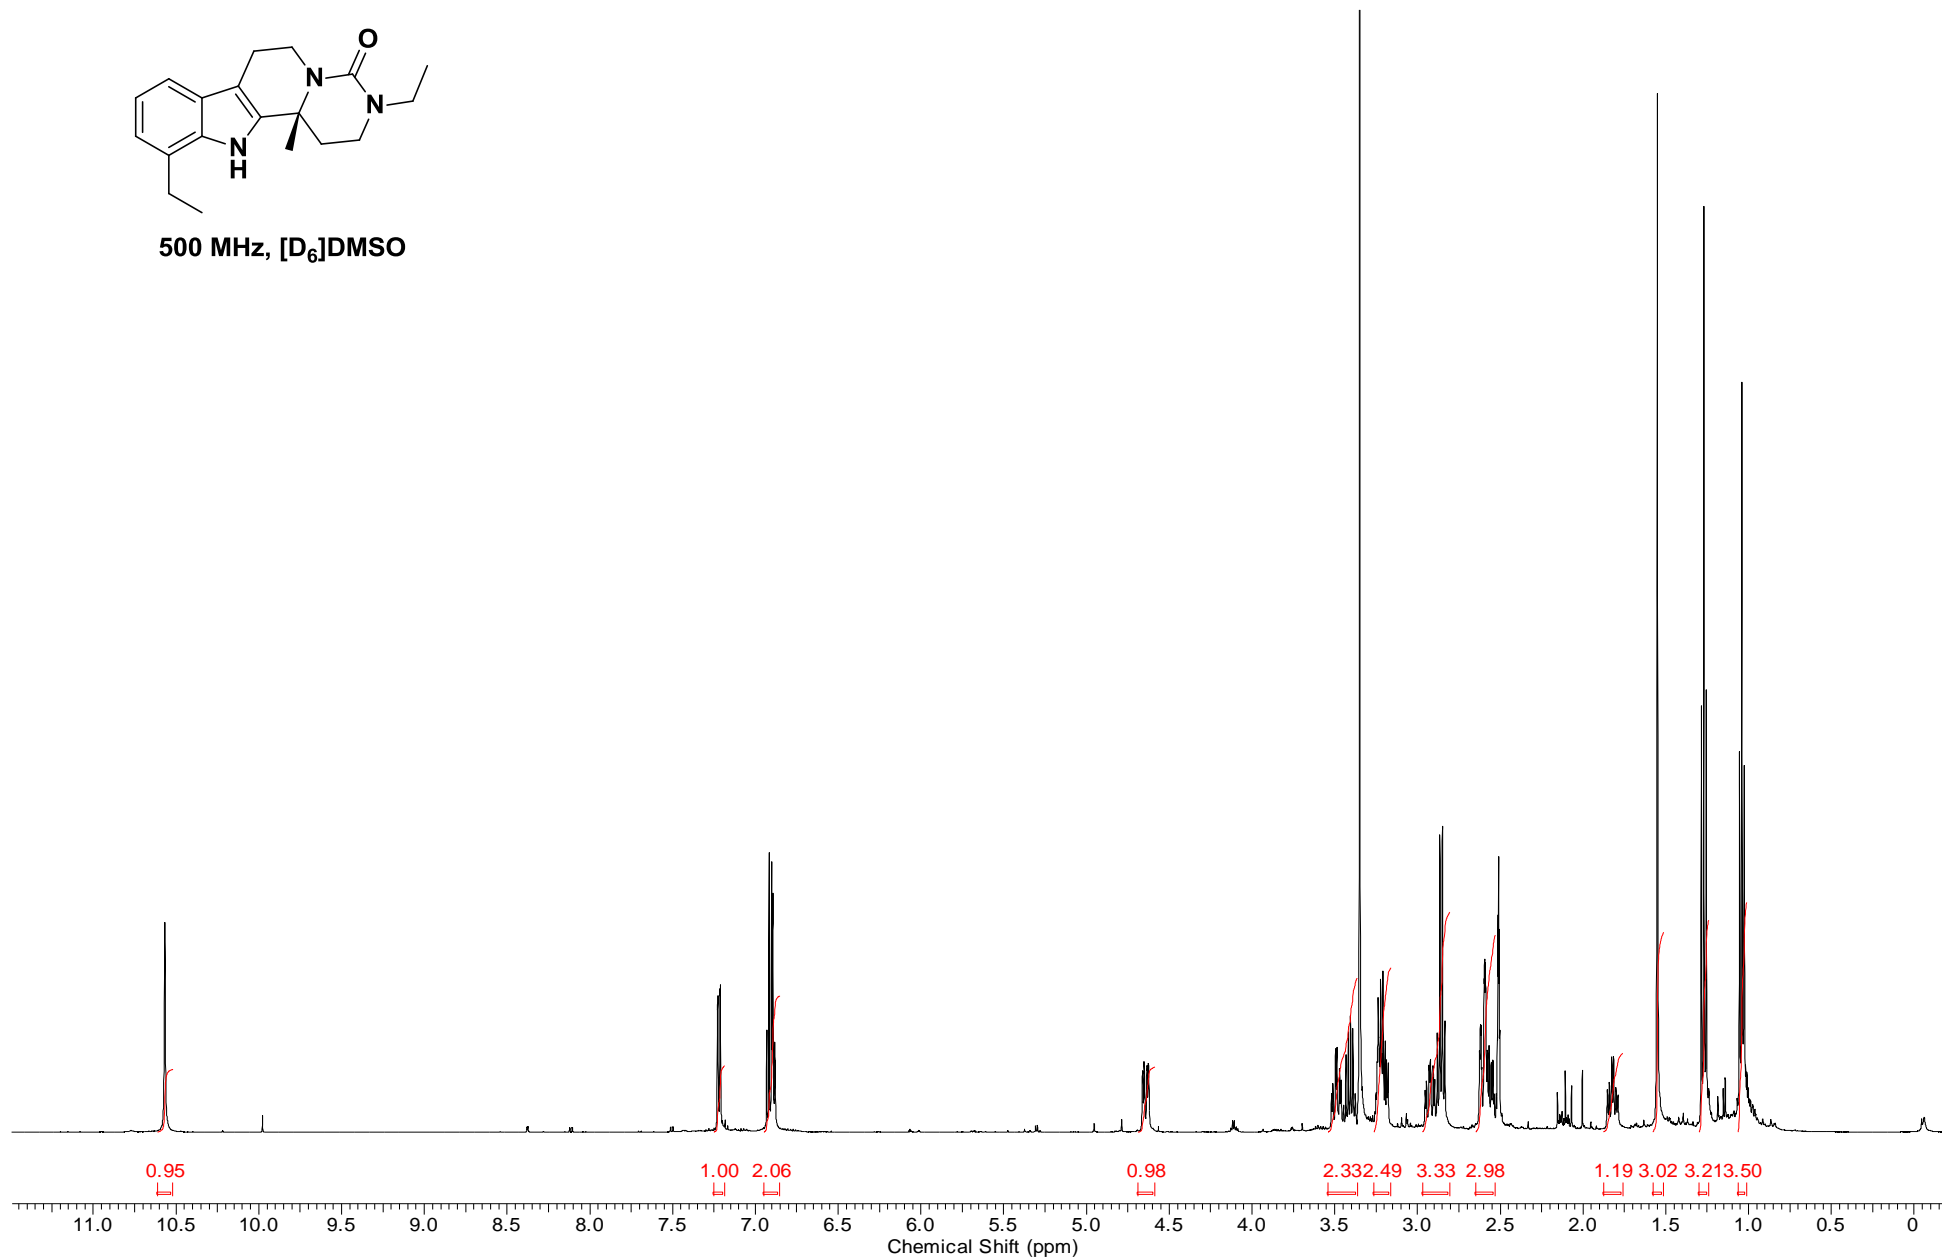

### 4.15.2 $^{13}\text{C}$ NMR of compound 9o

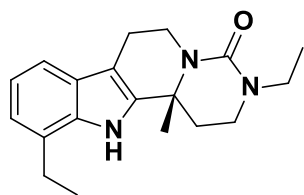

125 MHz,  $[\text{D}_6]\text{DMSO}$

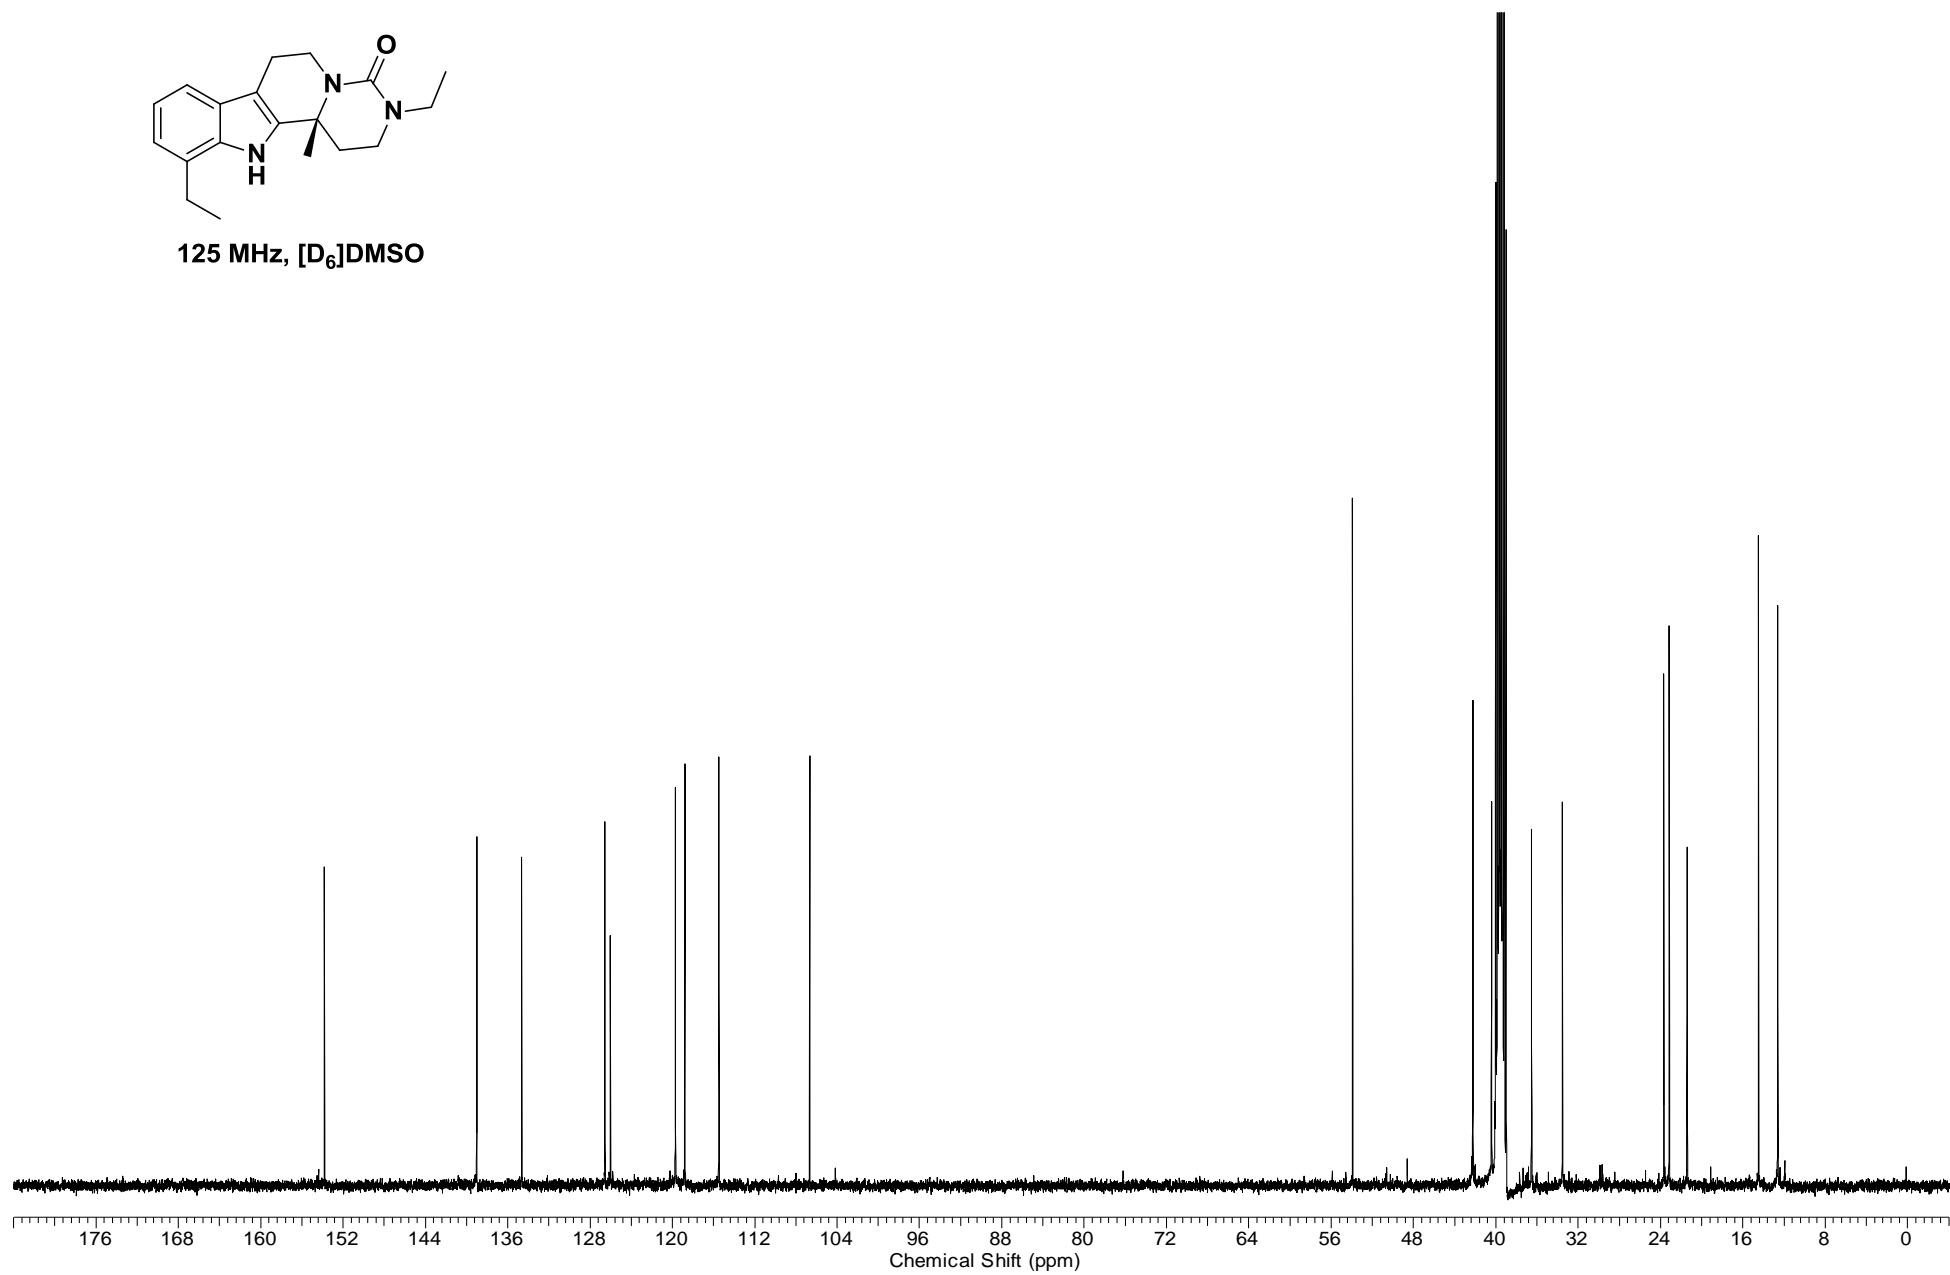

### 4.16.1 $^1\text{H}$ NMR of compound 9p

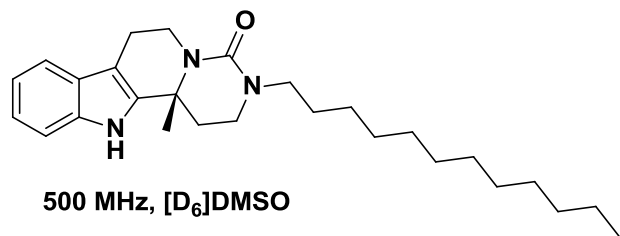

500 MHz,  $[\text{D}_6]\text{DMSO}$

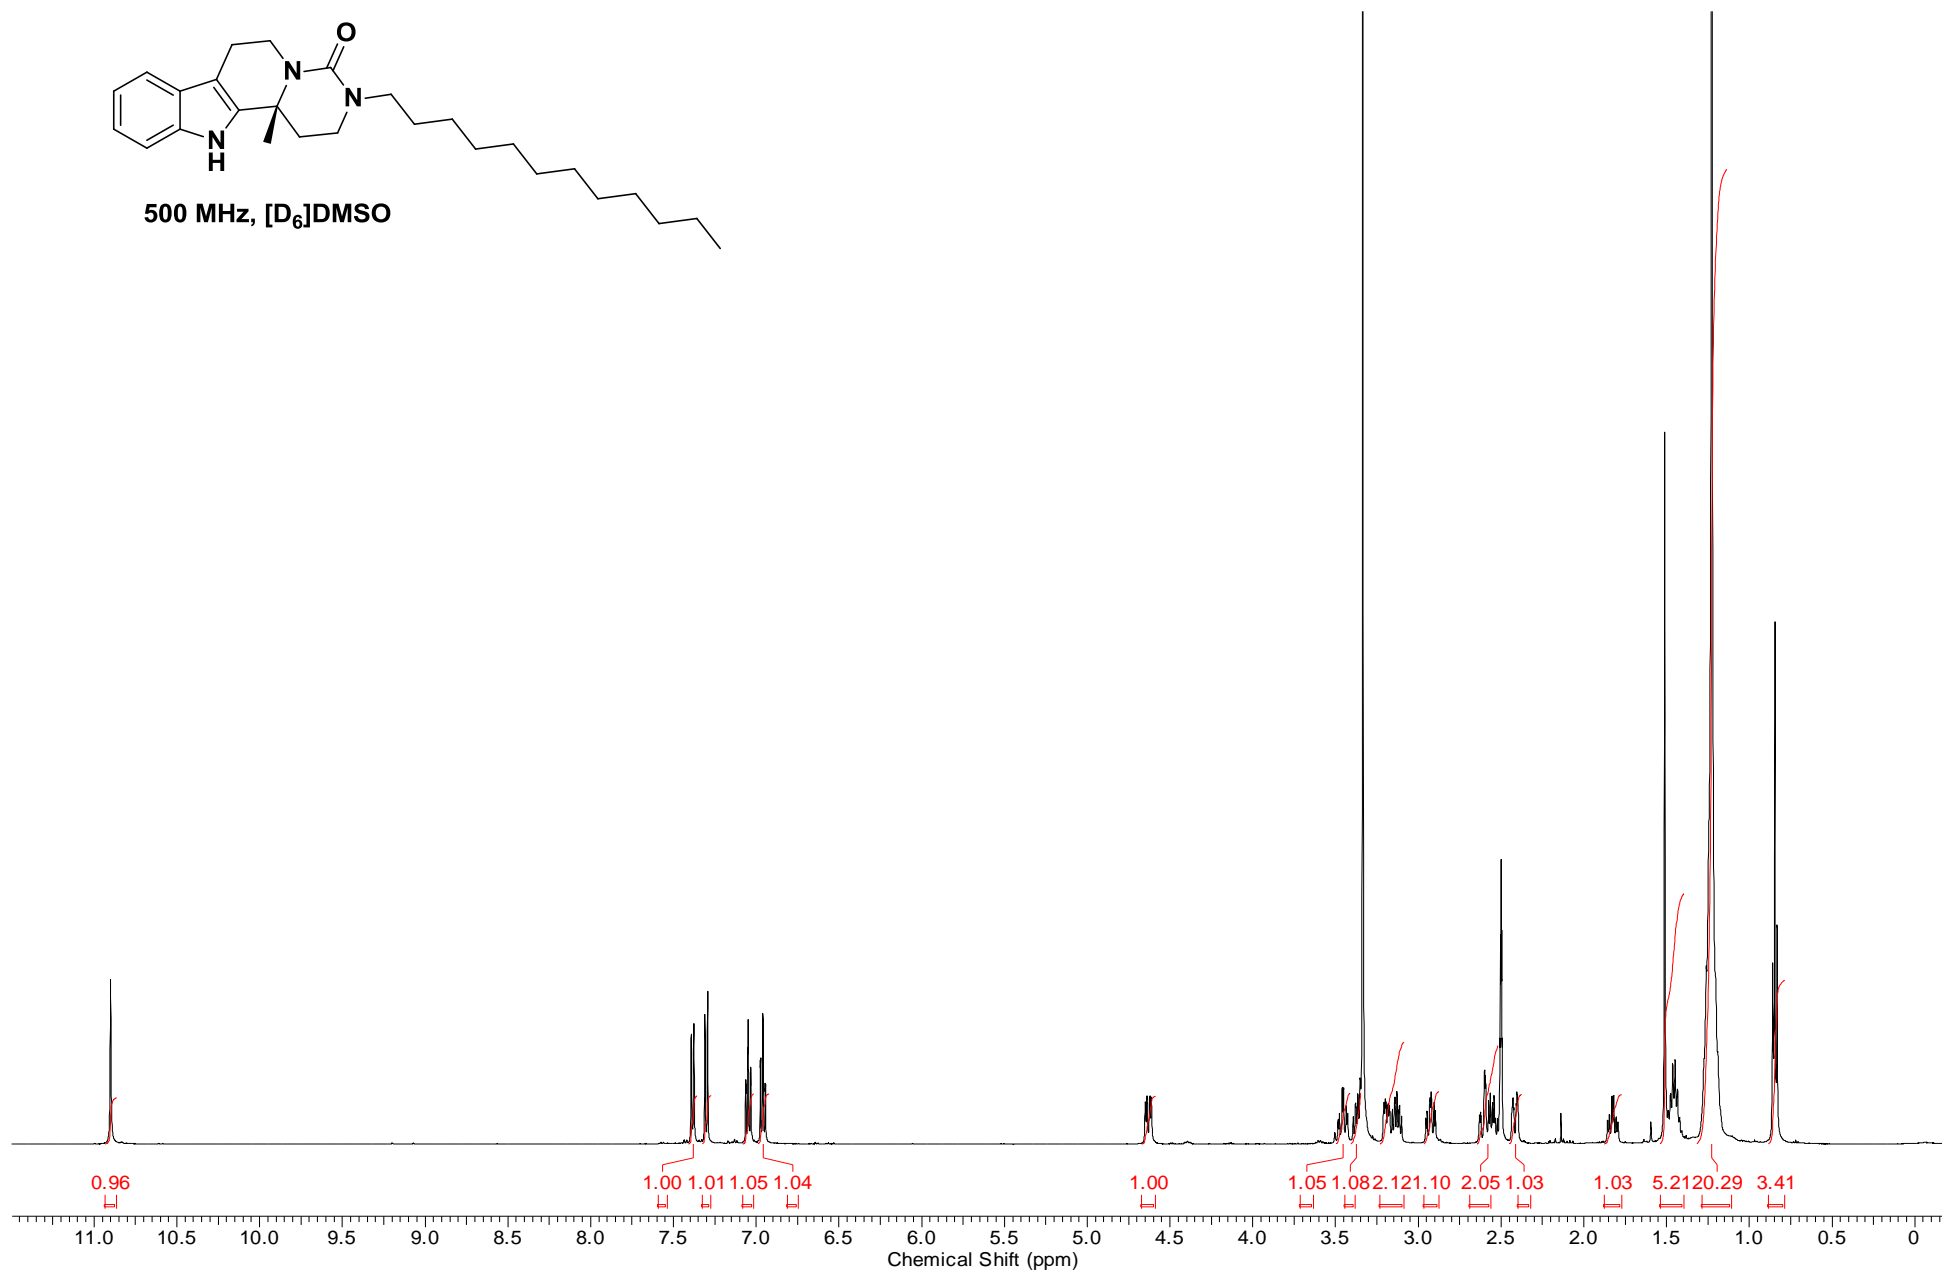

### 4.16.2 $^{13}\text{C}$ NMR of compound 9p

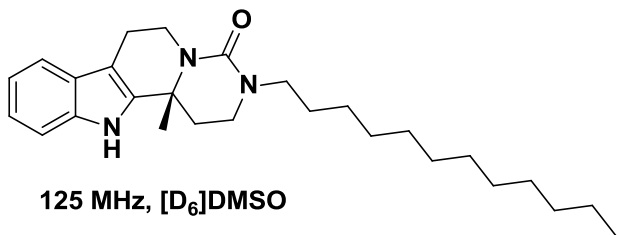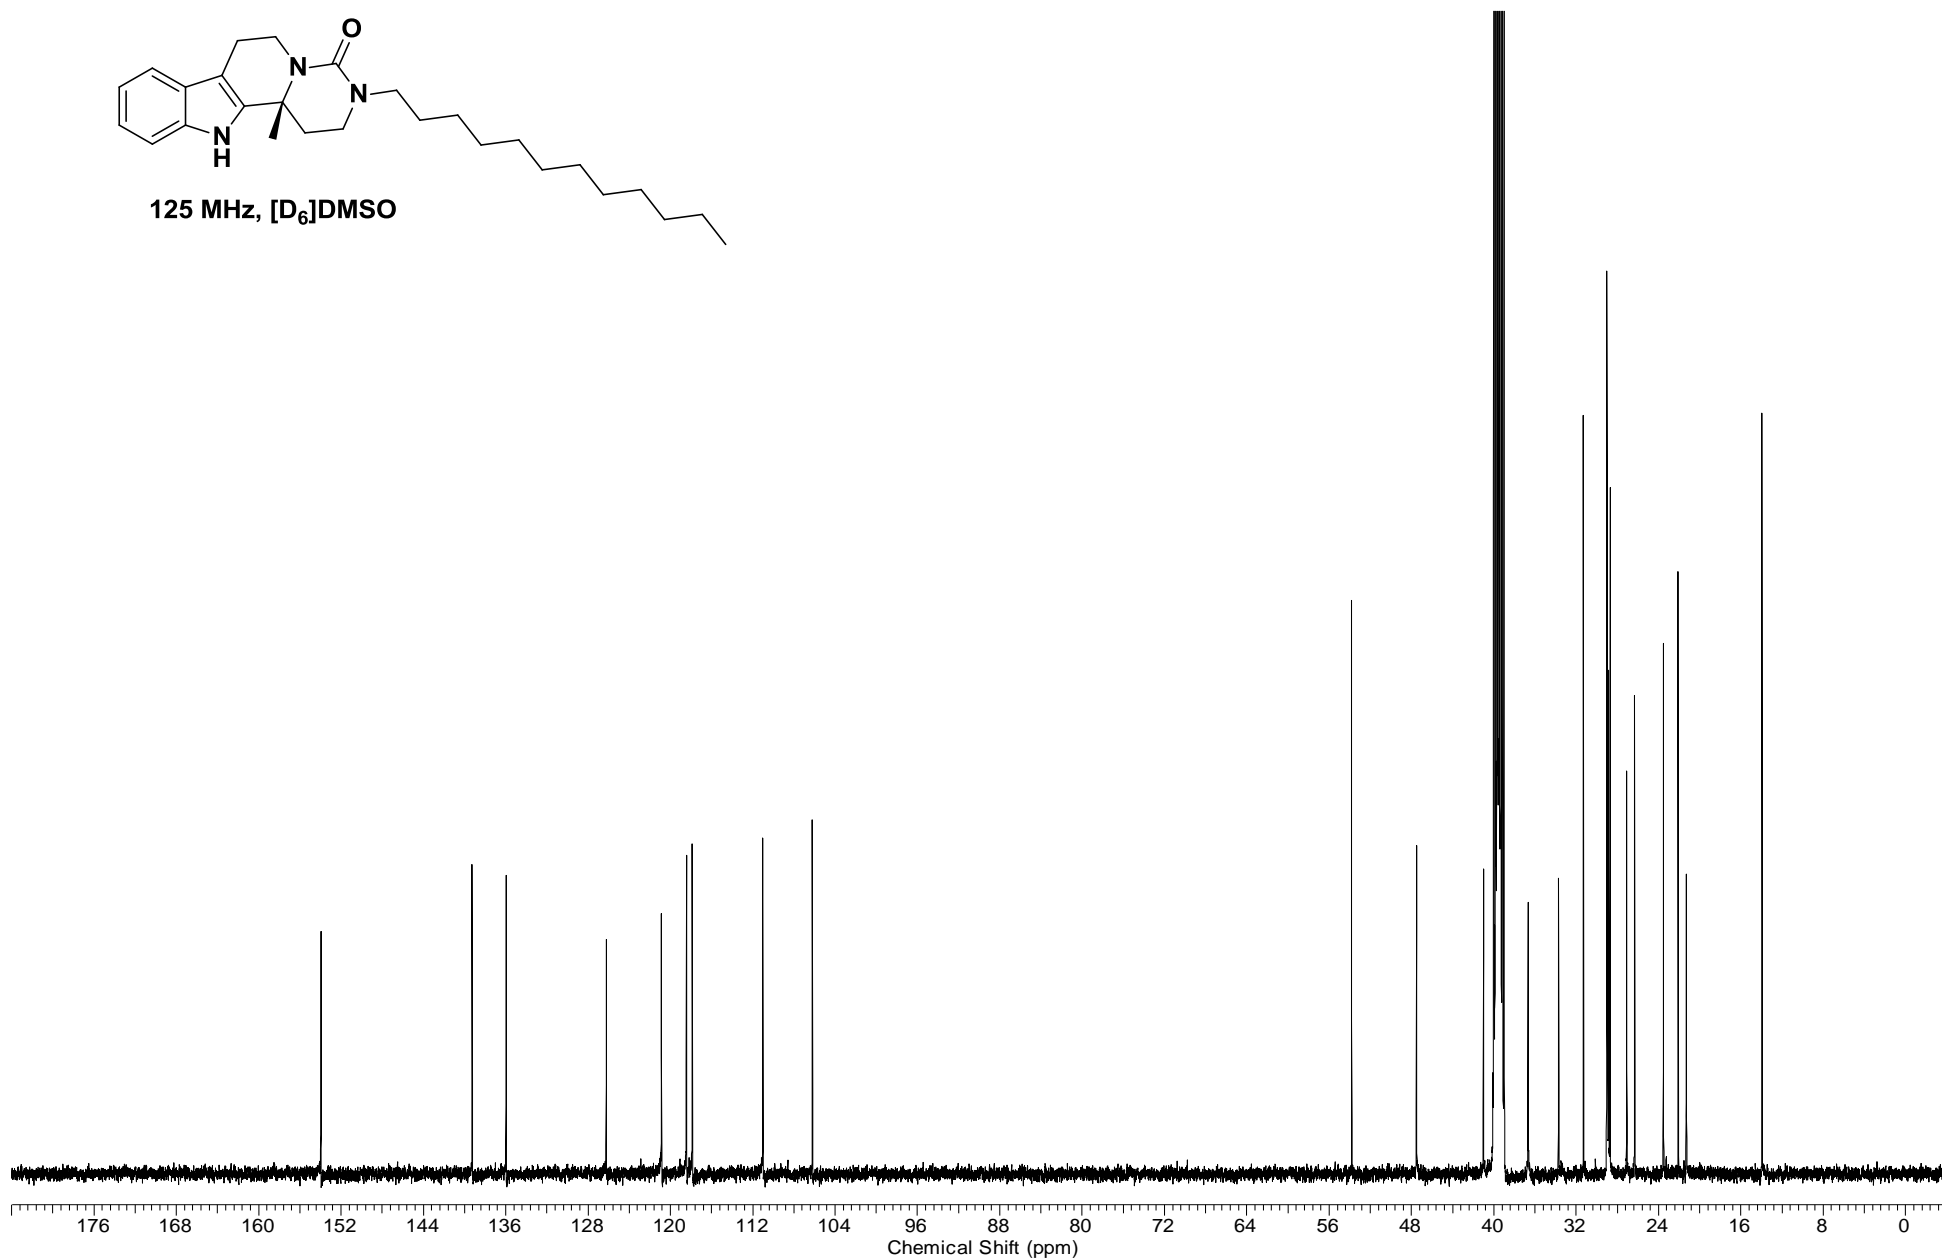

### 4.17.1 $^1\text{H}$ NMR of compound 9q

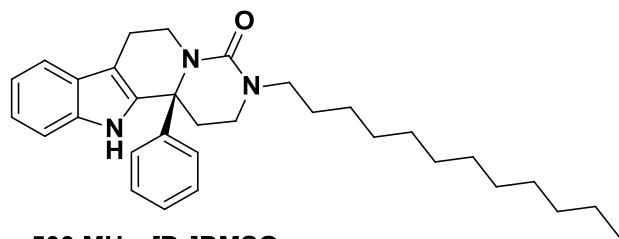

500 MHz,  $[\text{D}_6]\text{DMSO}$

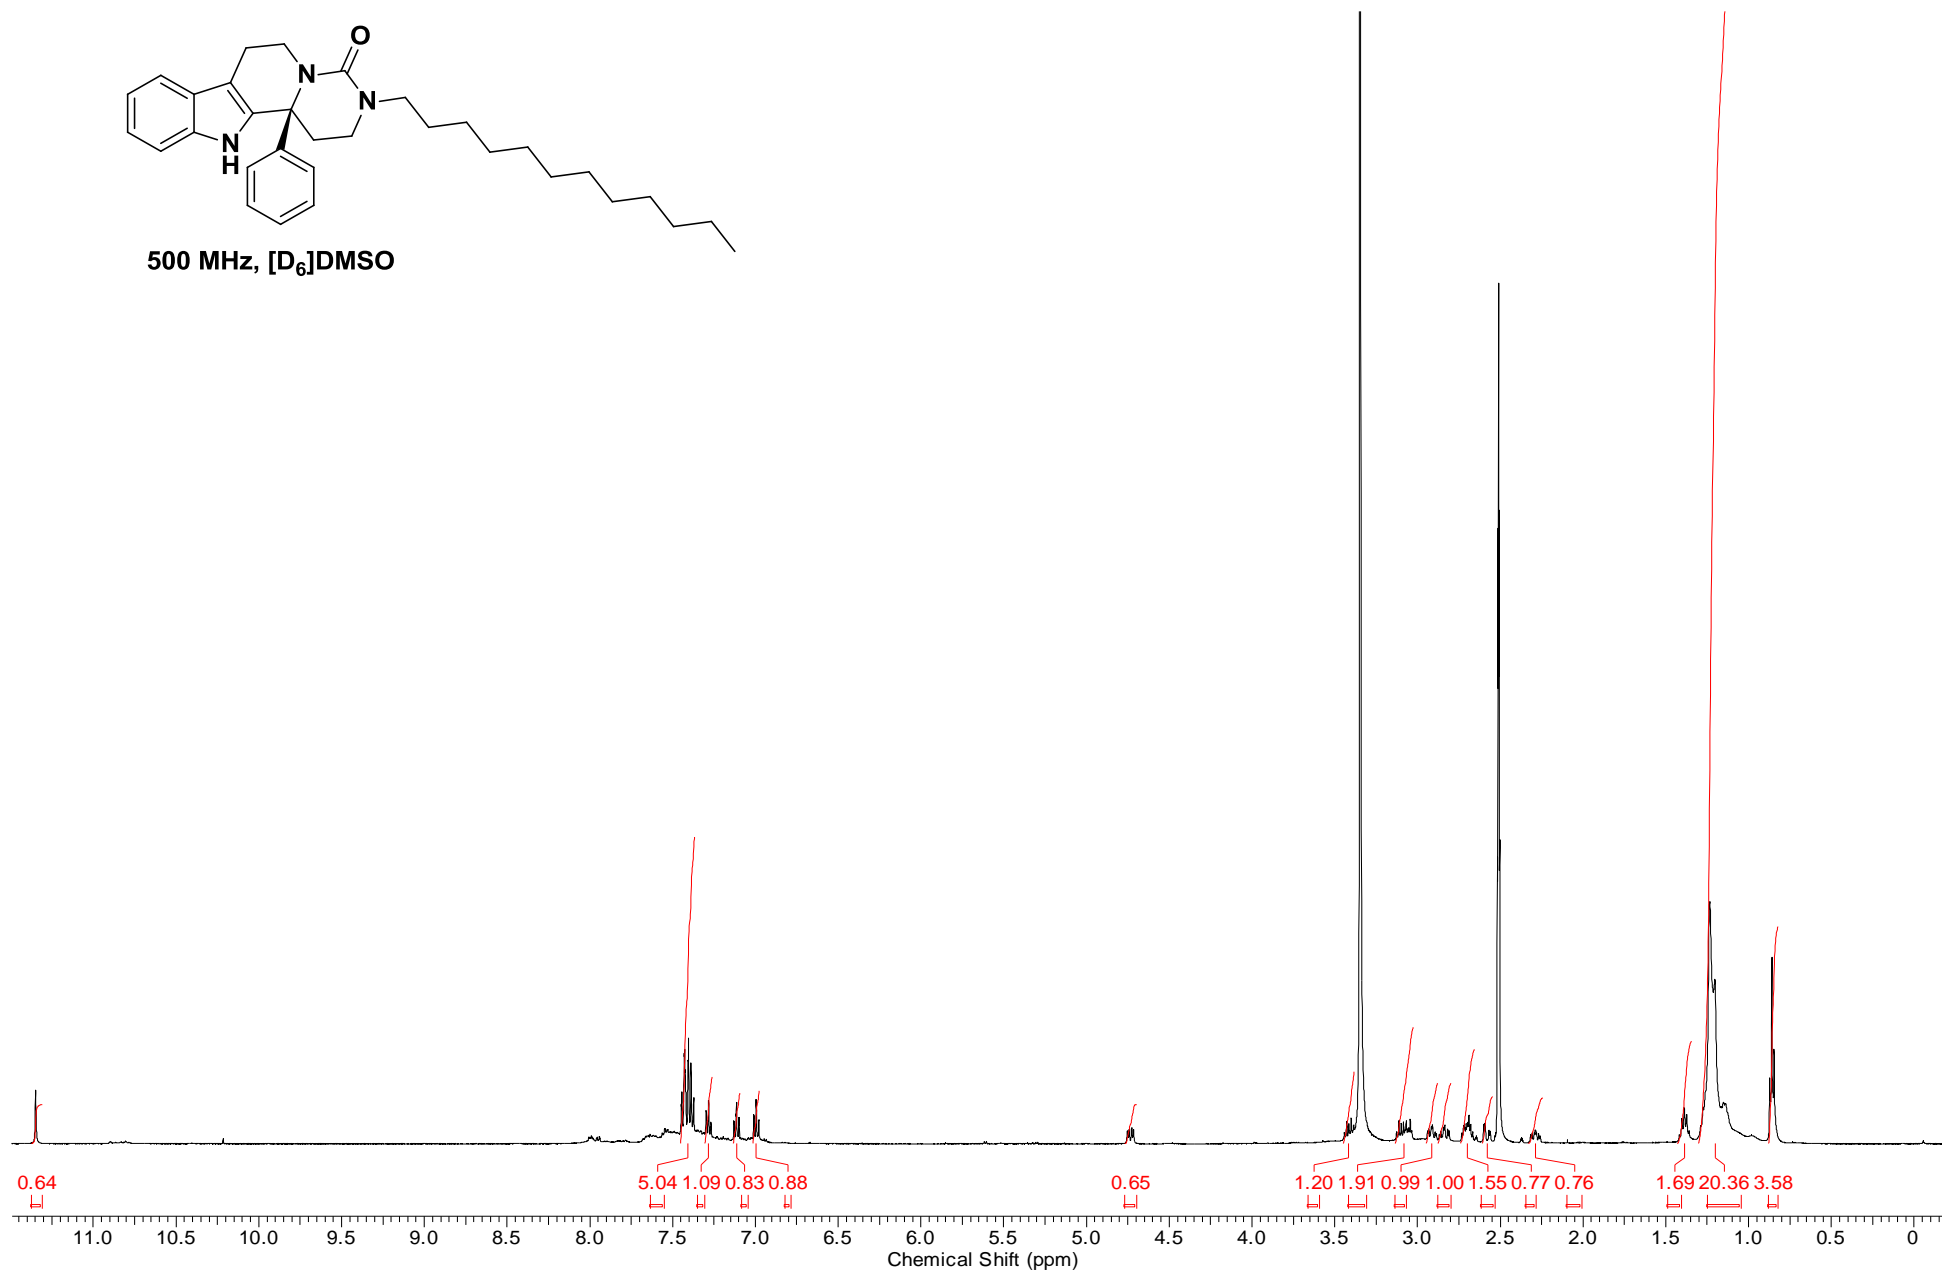

#### 4.17.2 $^{13}\text{C}$ NMR of compound 9q

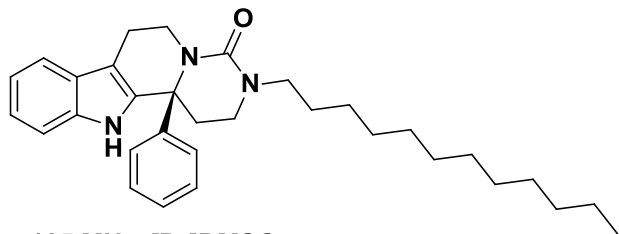

125 MHz,  $[\text{D}_6]\text{DMSO}$

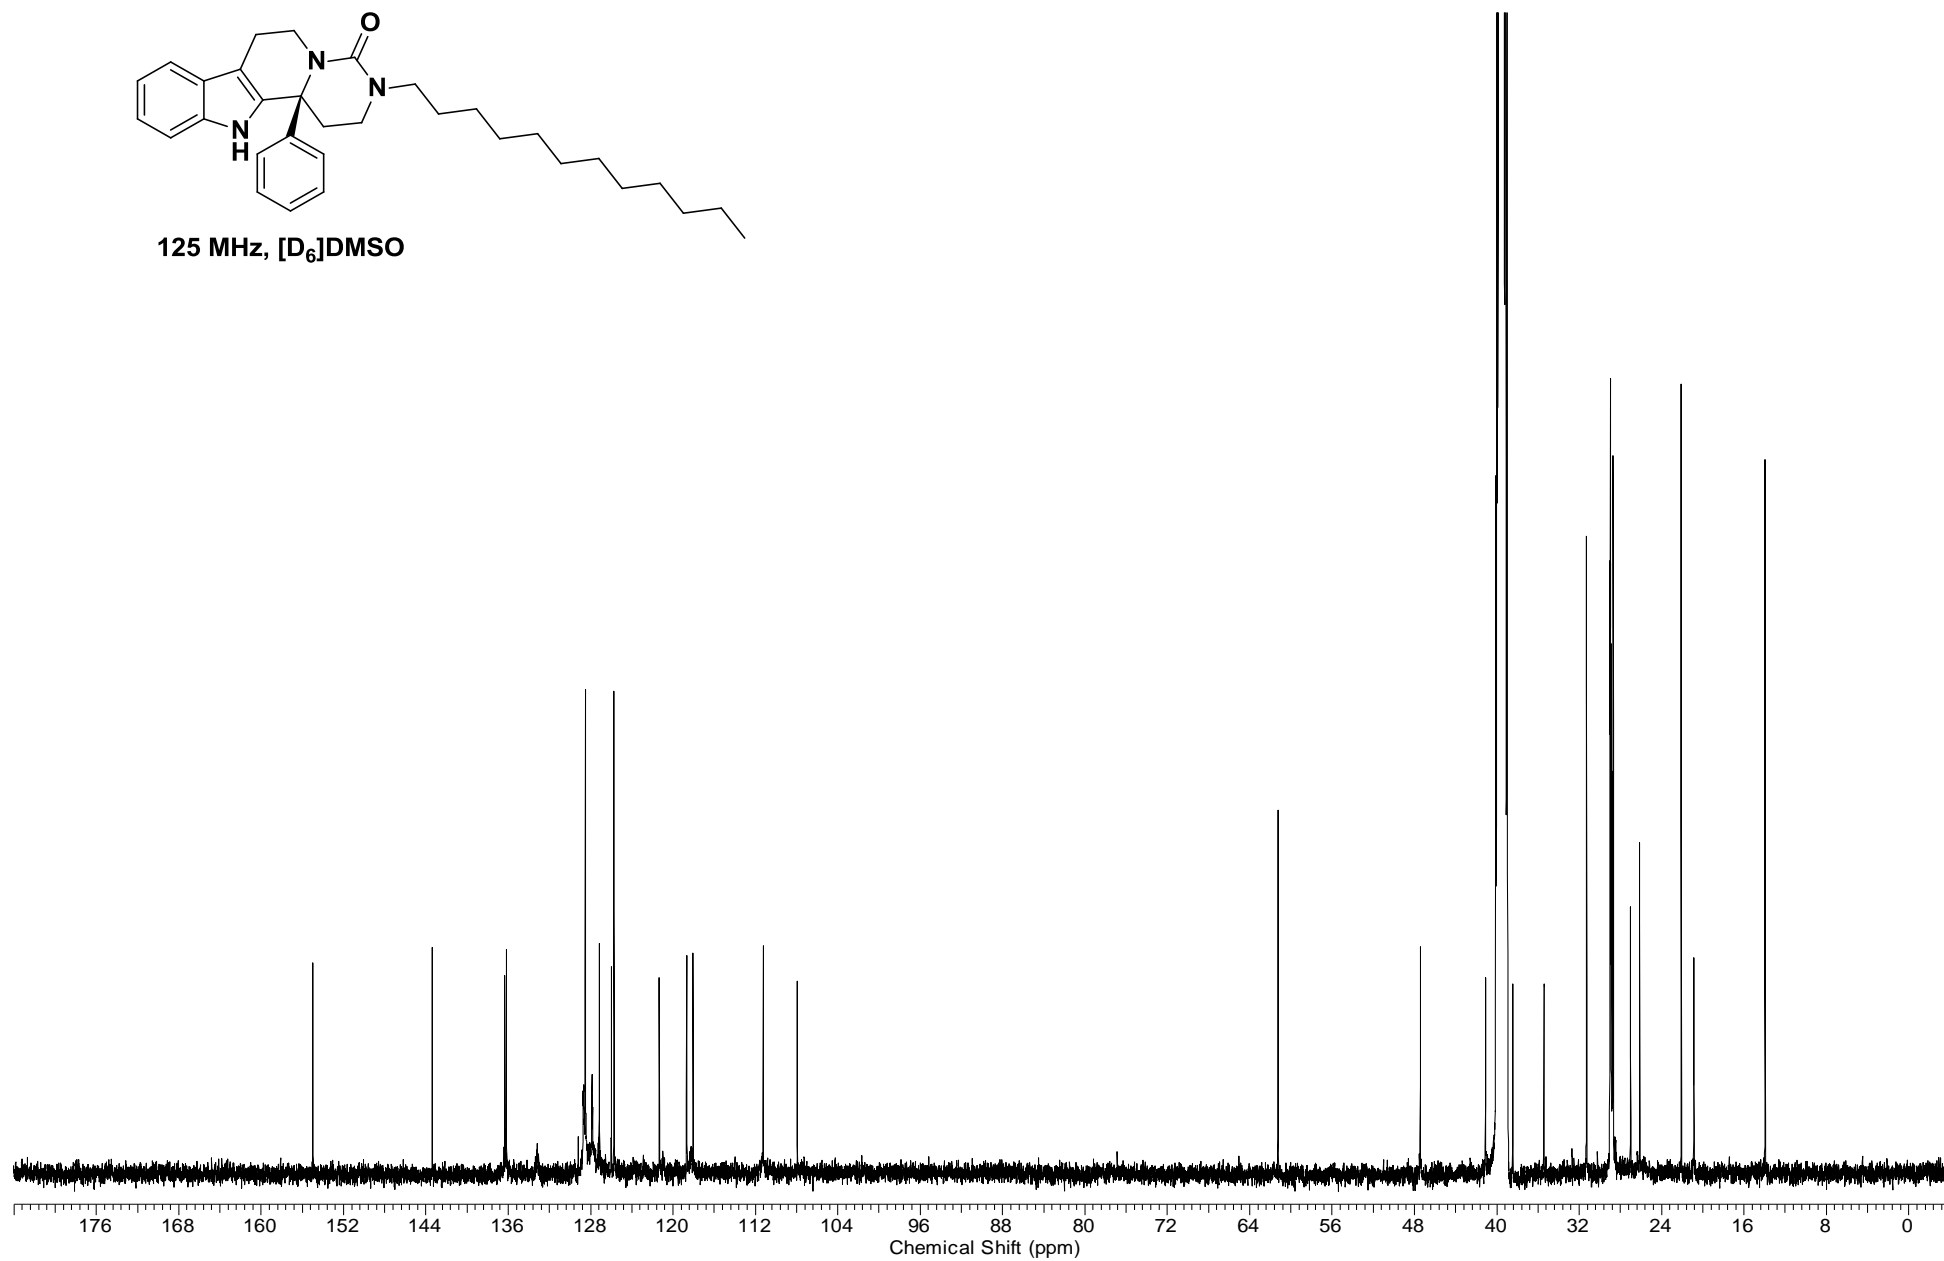

### 4.18.1 $^1\text{H}$ NMR of compound 9r

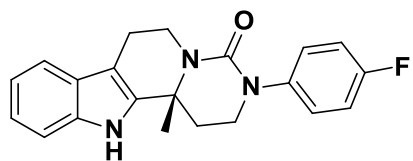

500 MHz,  $[\text{D}_6]\text{DMSO}$

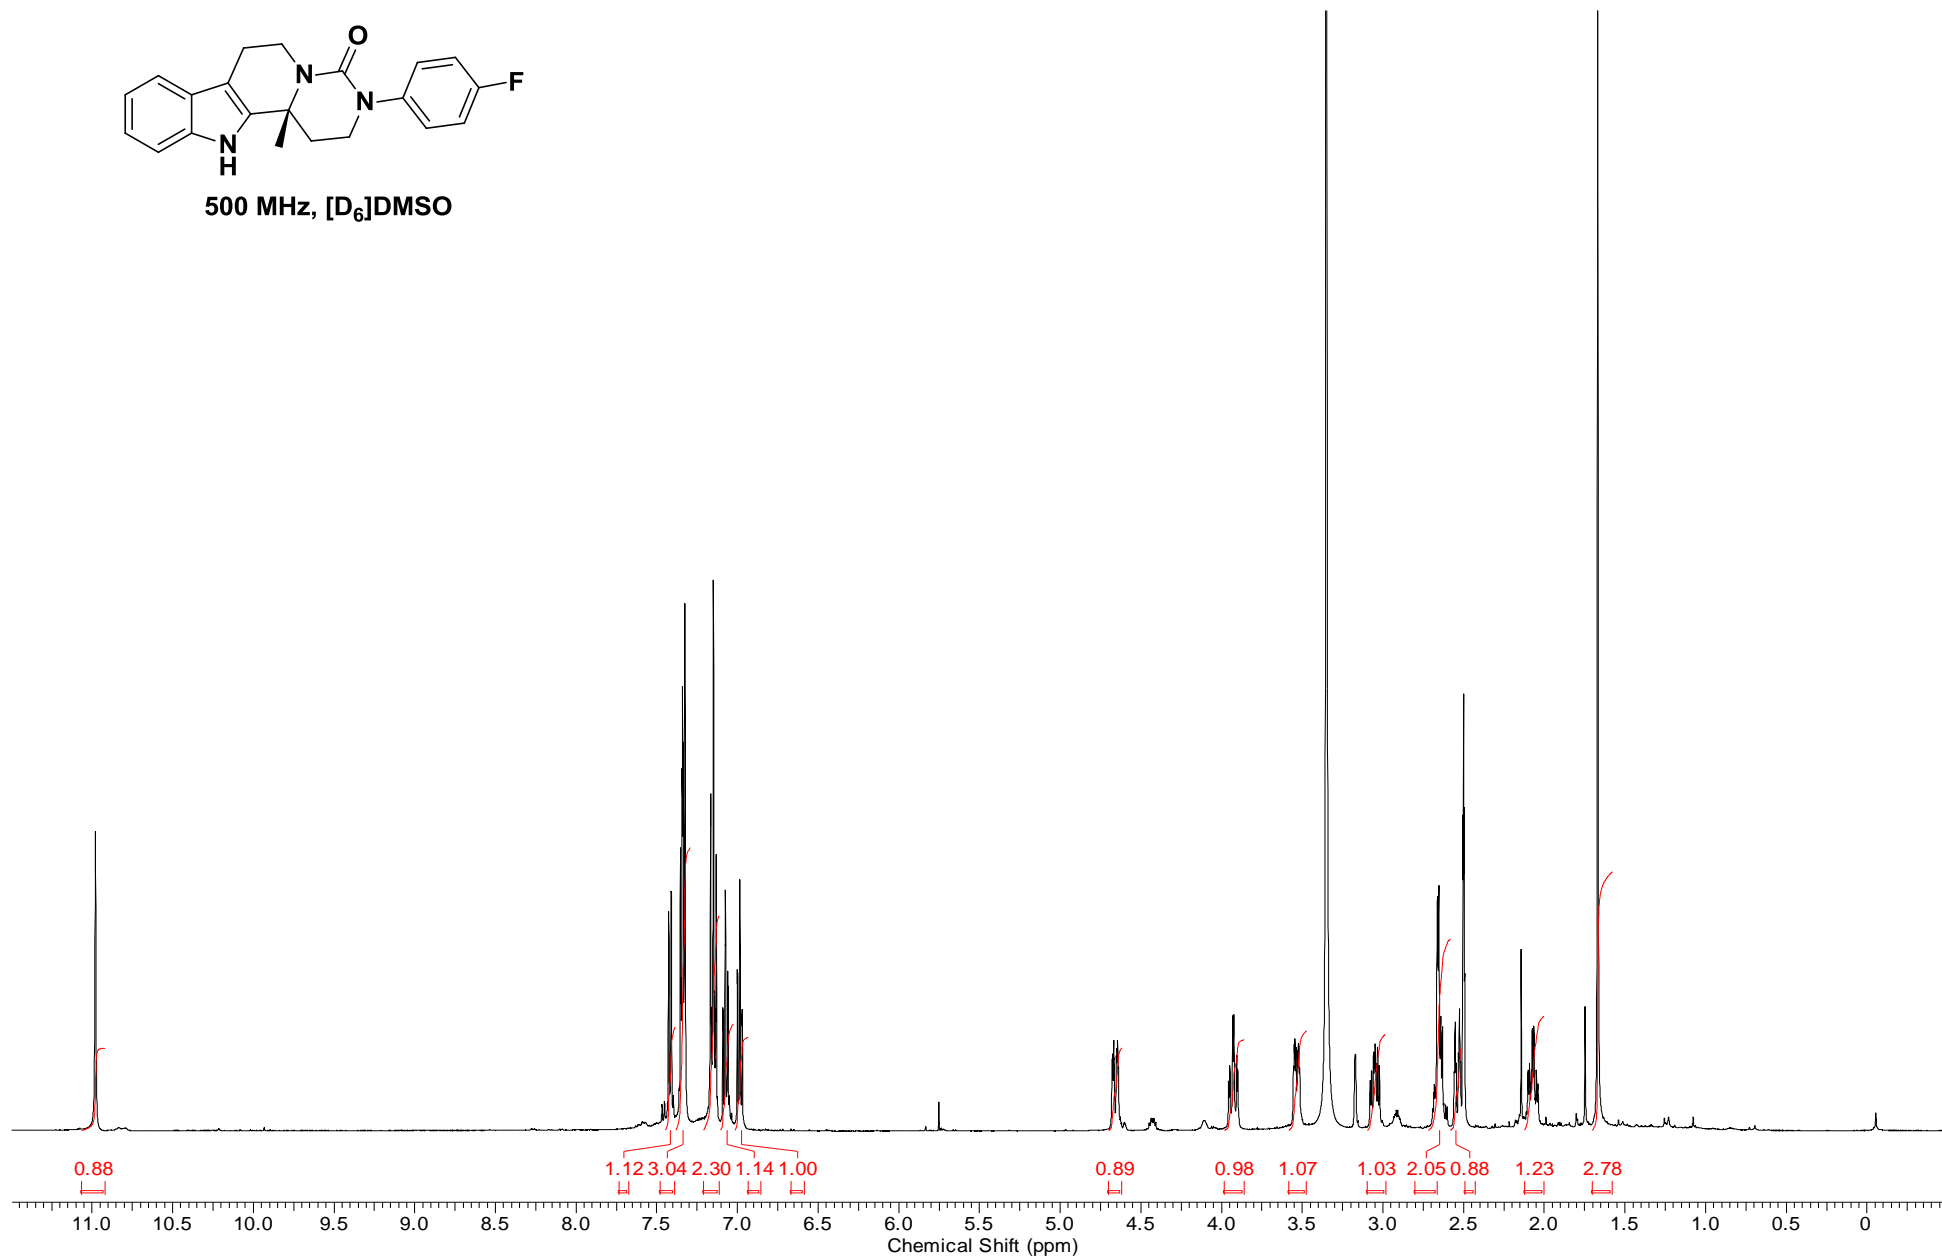

### 4.18.2 $^{13}\text{C}$ NMR of compound 9r

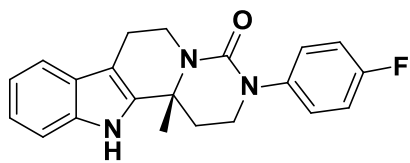

125 MHz,  $[\text{D}_6]\text{DMSO}$

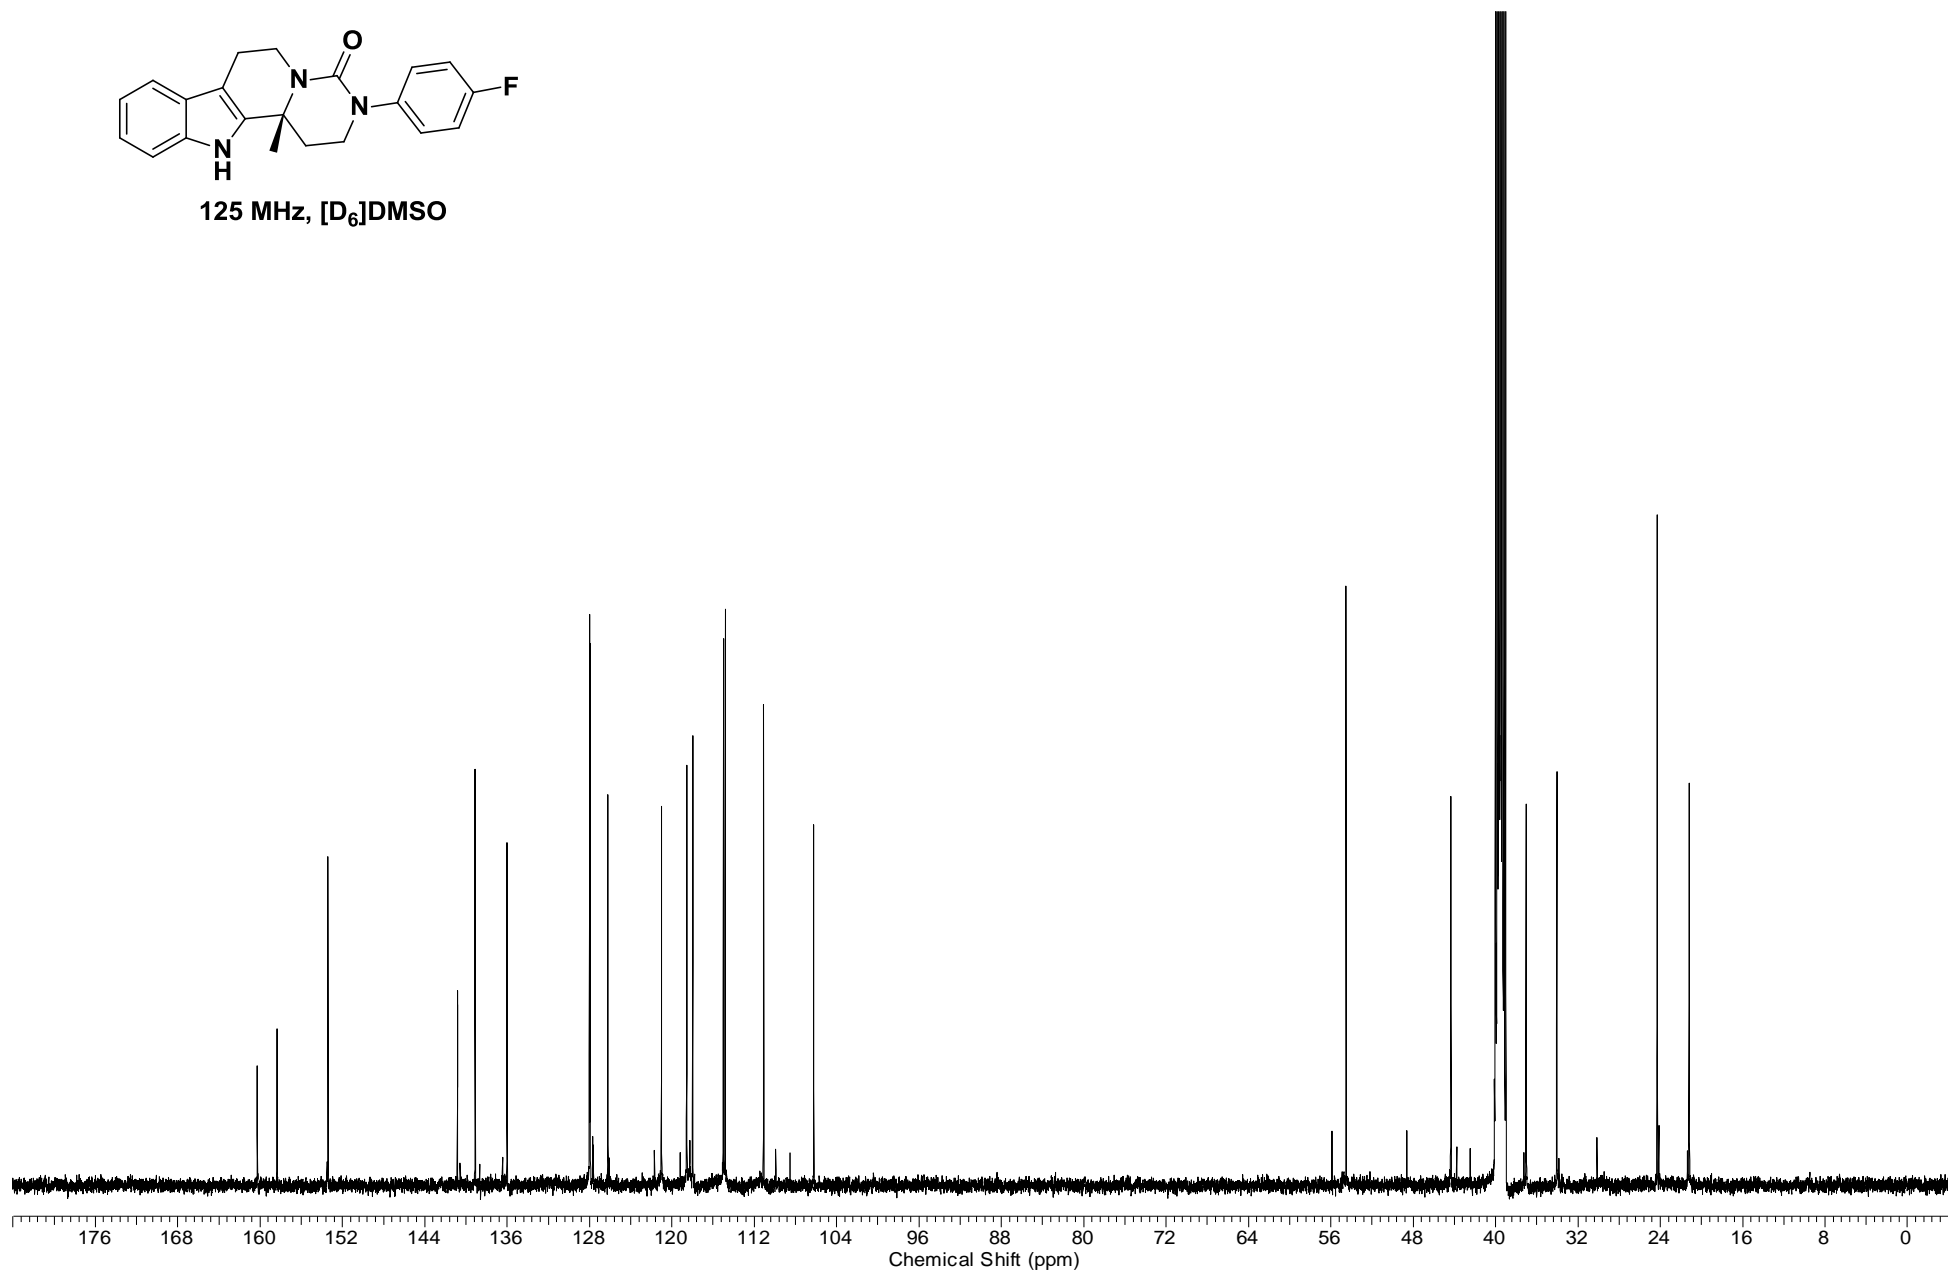



### 4.19.1 $^1\text{H}$ NMR of compound 9s

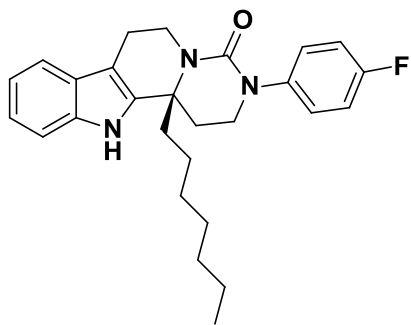

500 MHz,  $[\text{D}_6]\text{DMSO}$

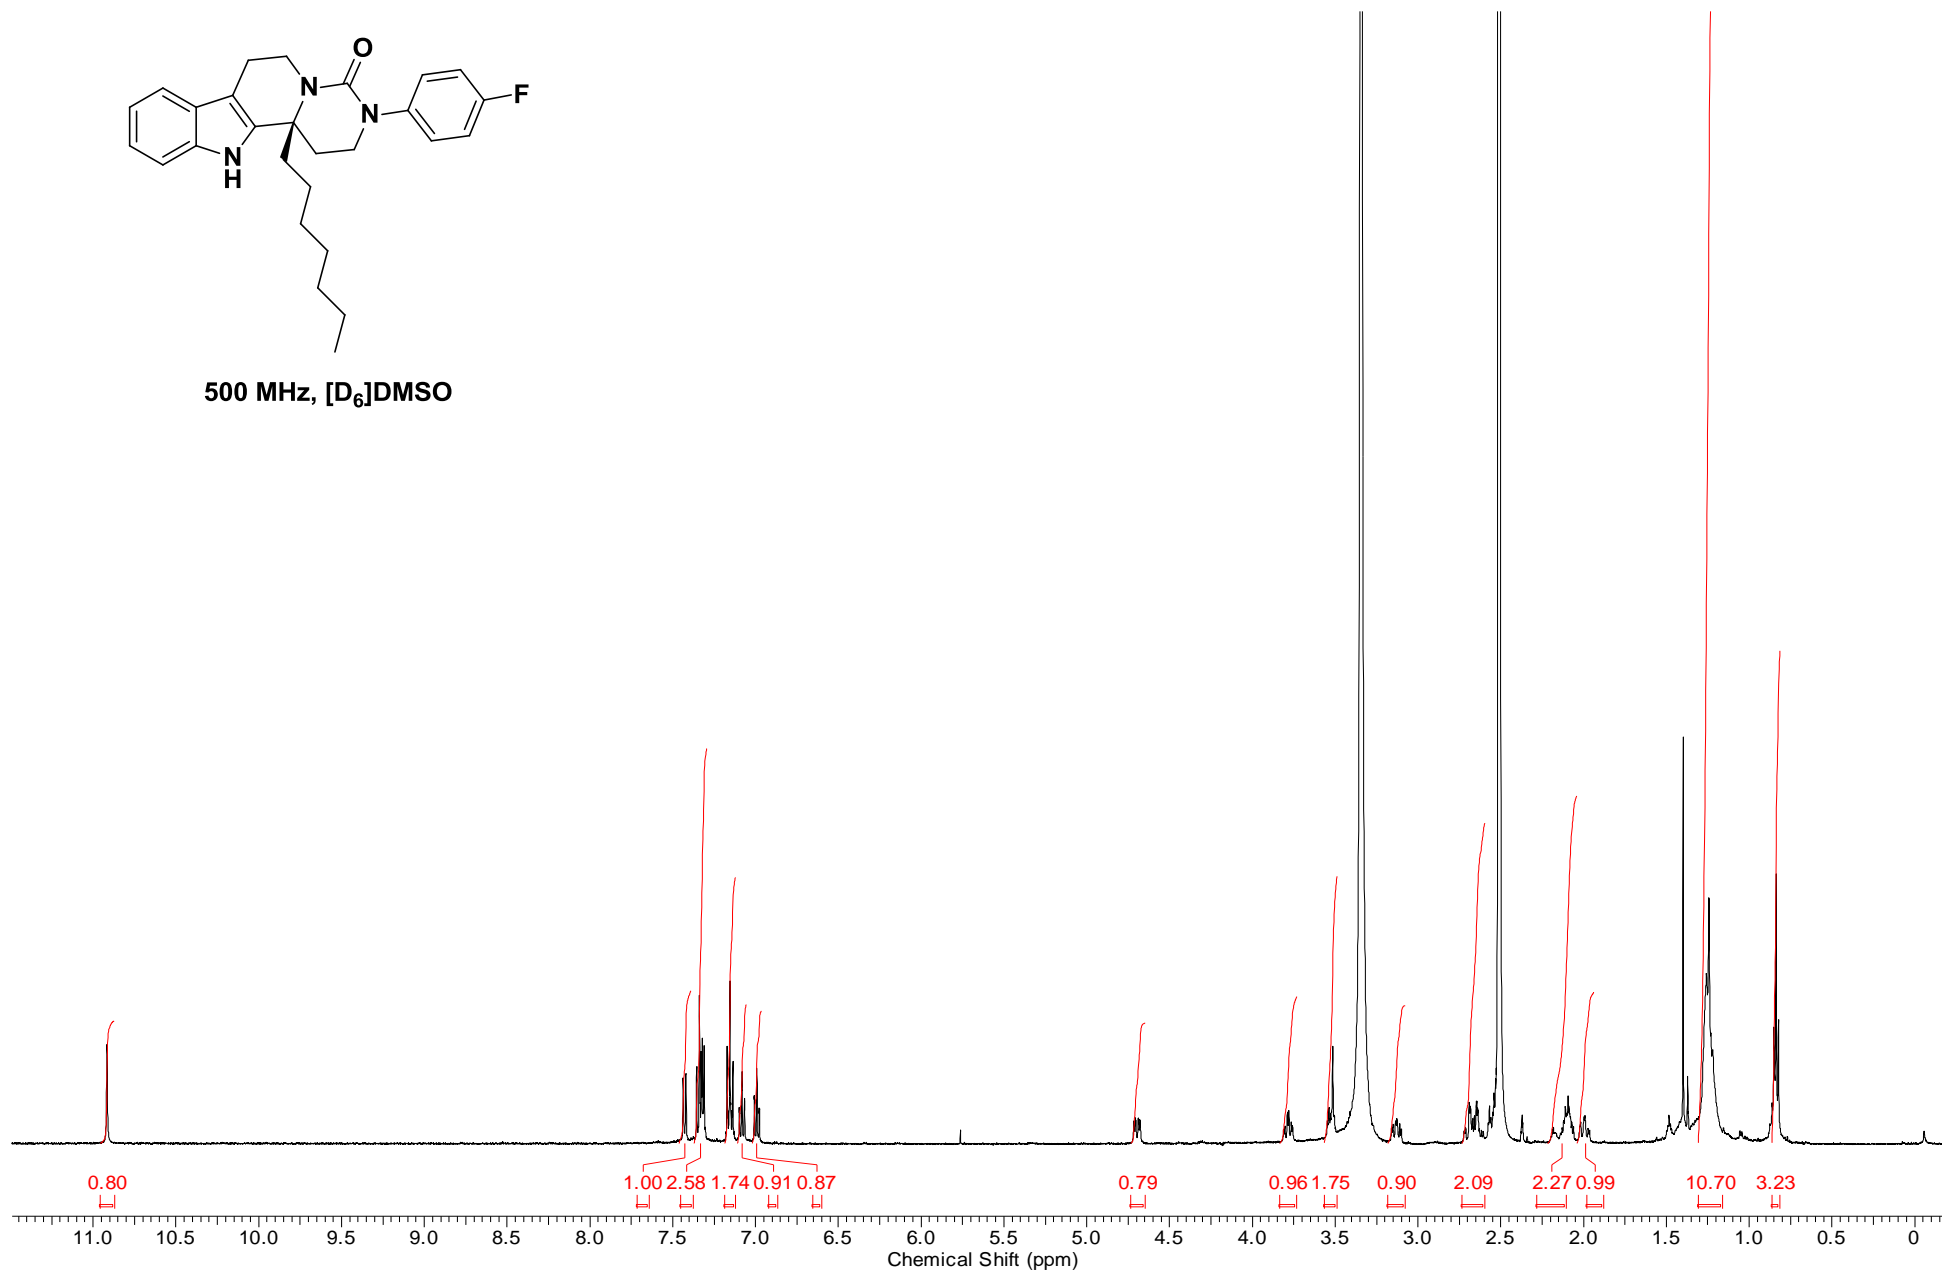

### 4.19.2 $^{13}\text{C}$ NMR of compound 9s

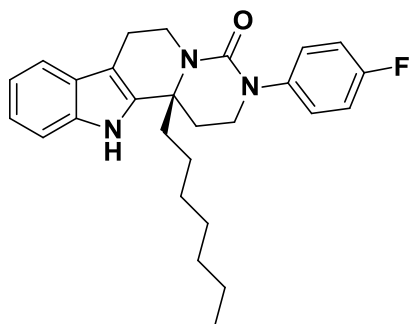

125 MHz,  $[\text{D}_6]\text{DMSO}$

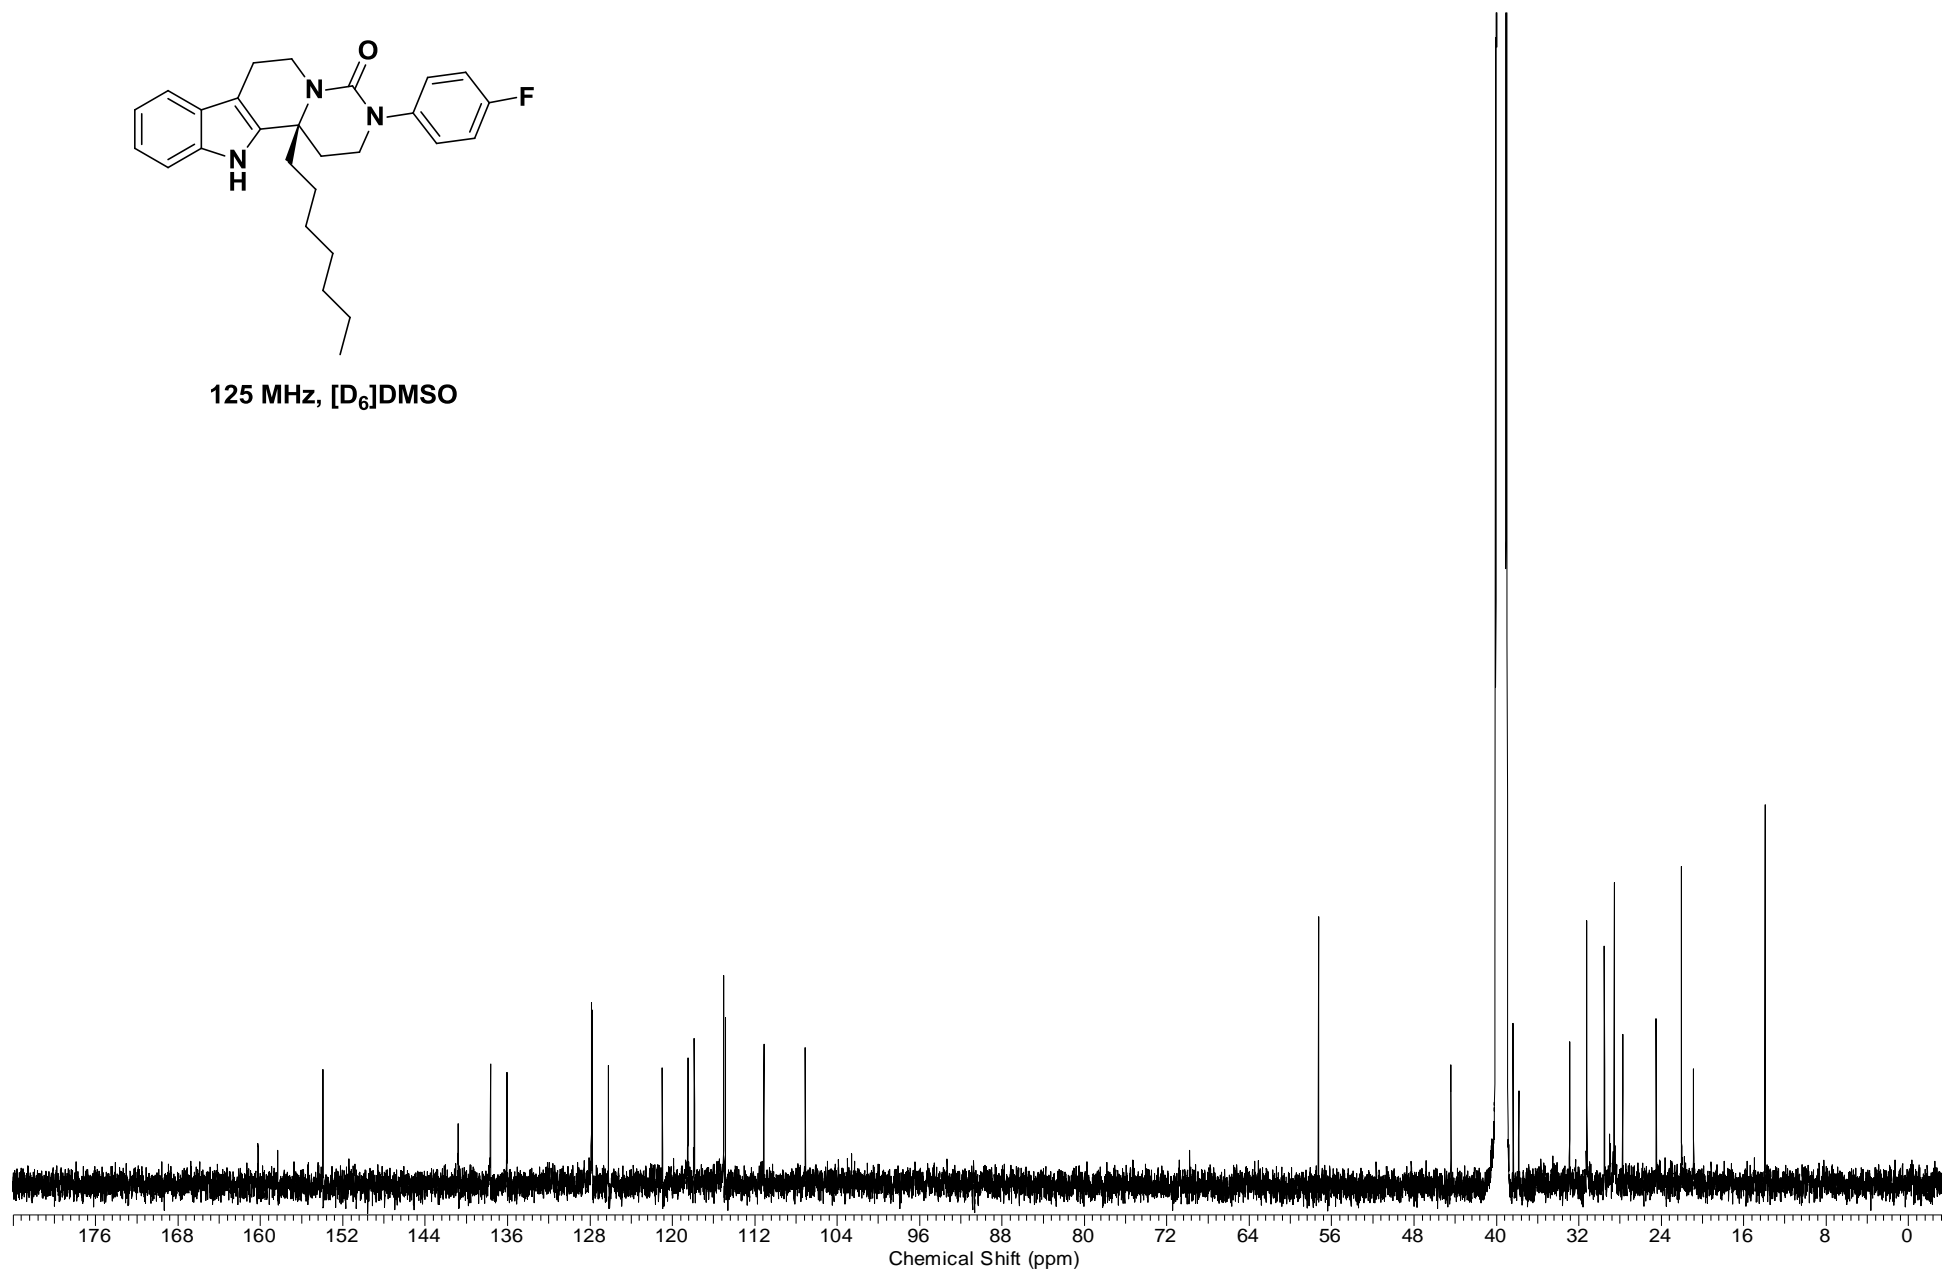

### 4.20.1 $^1\text{H}$ NMR of compound 9t

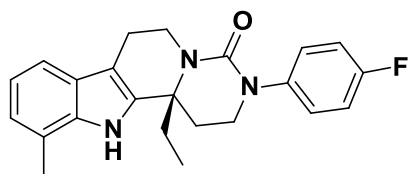

500 MHz,  $[\text{D}_6]\text{DMSO}$

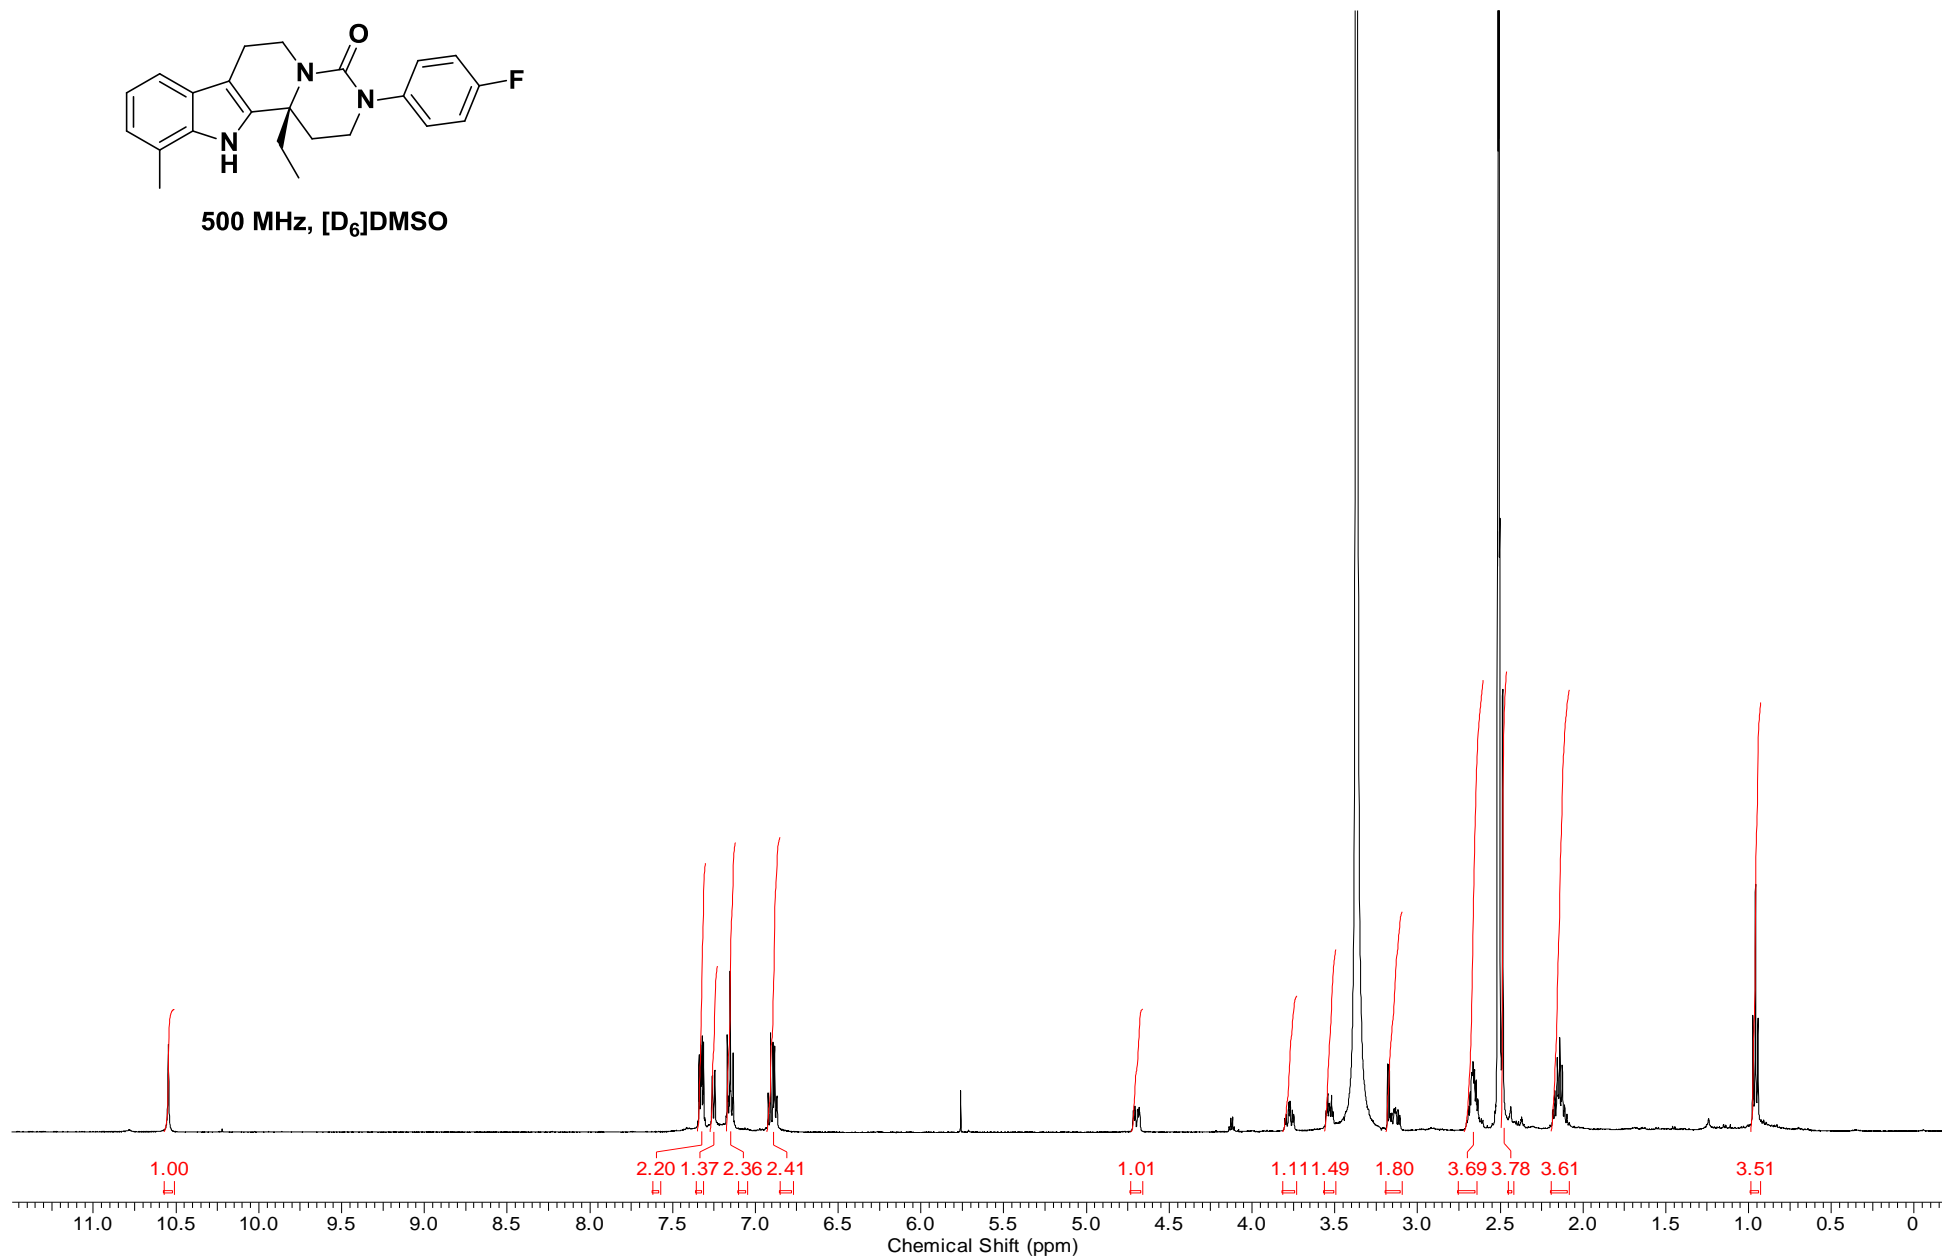

### 4.20.2 $^{13}\text{C}$ NMR of compound 9t

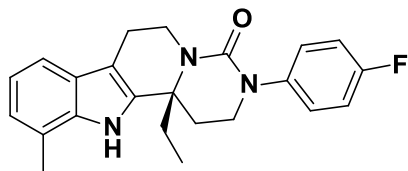

125 MHz, [D<sub>6</sub>]DMSO

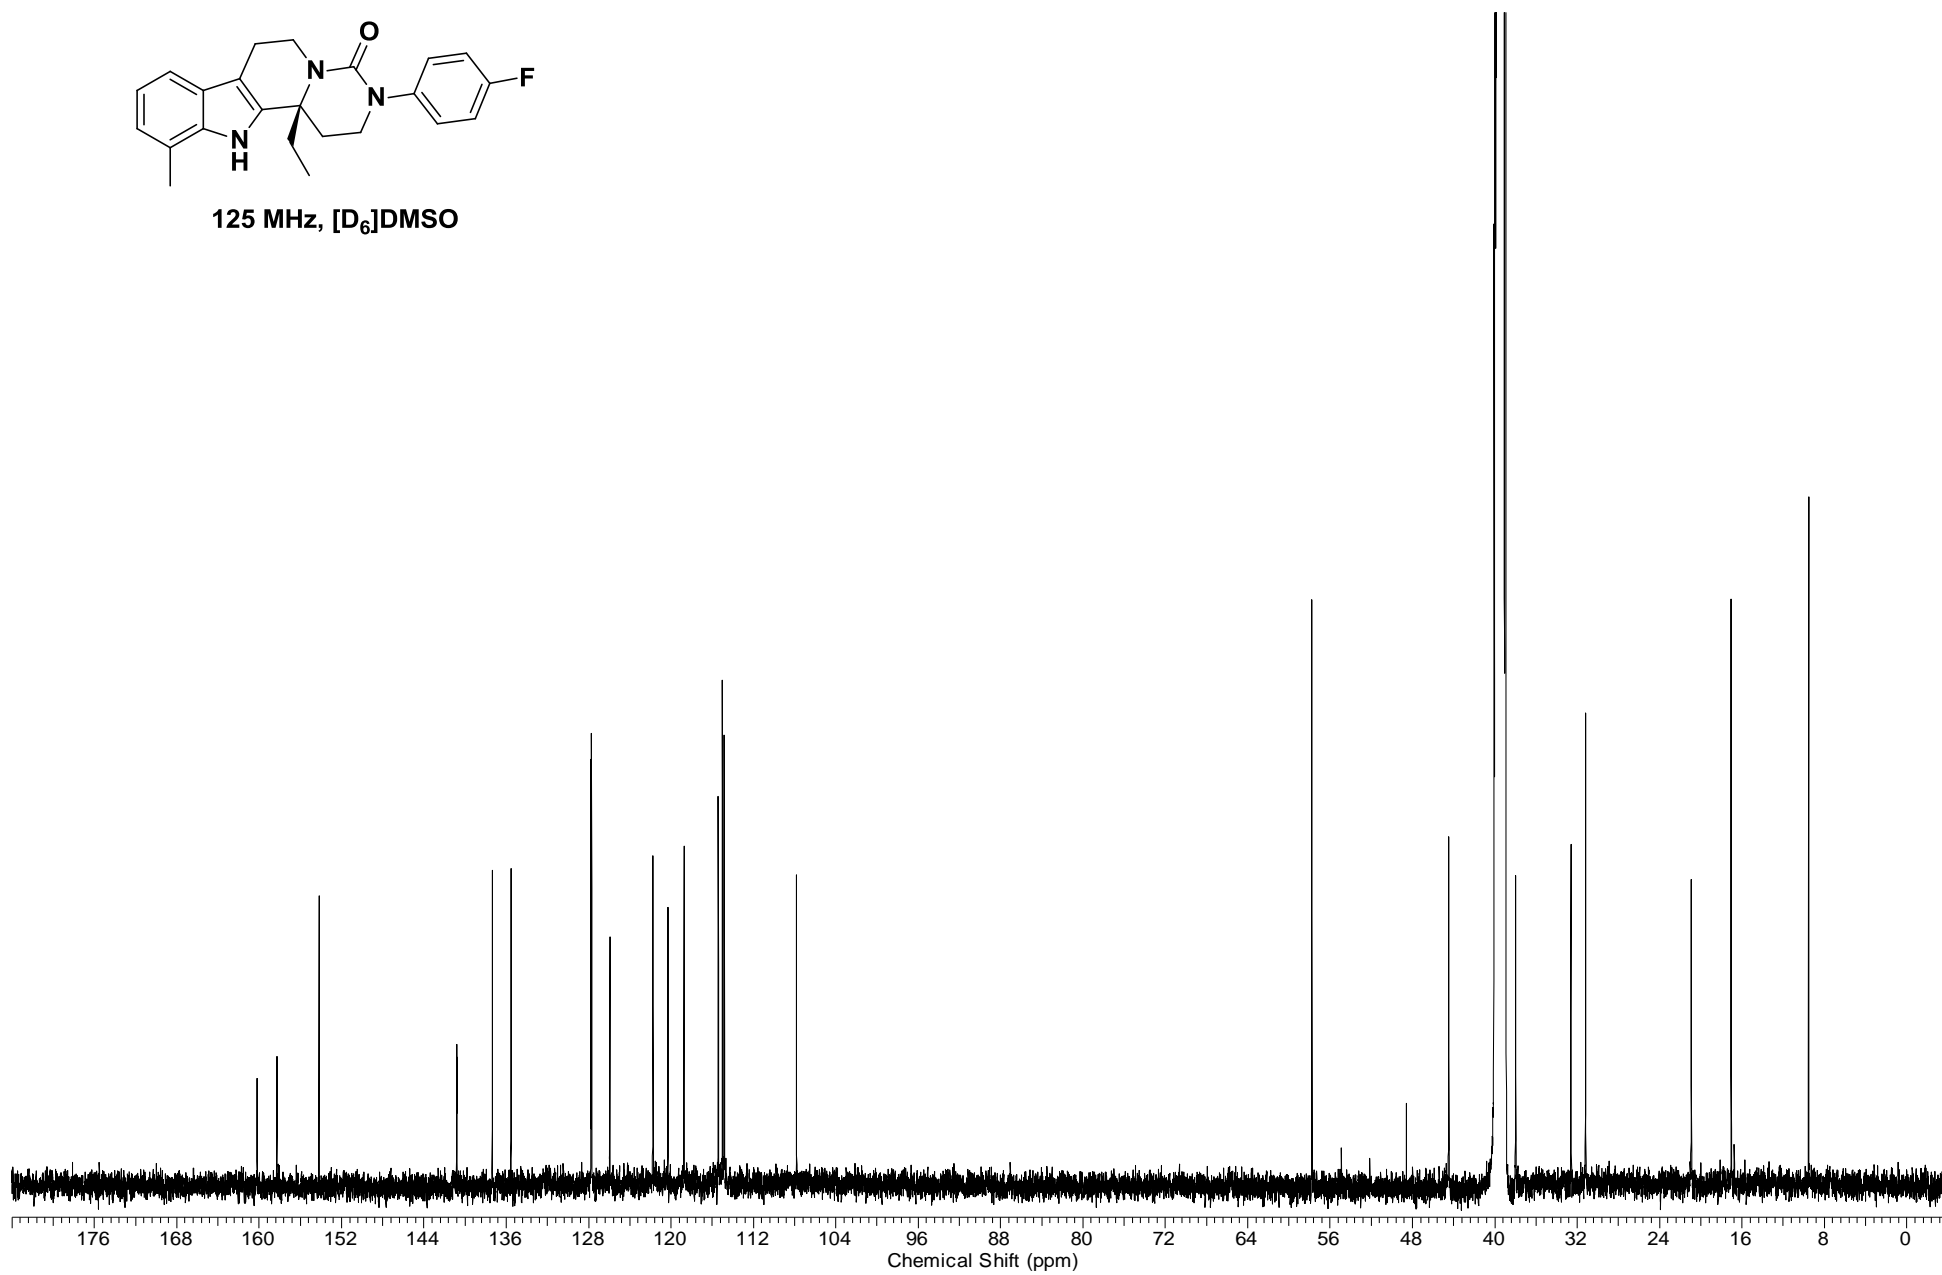

### 4.21.1 $^1\text{H}$ NMR of compound 9u

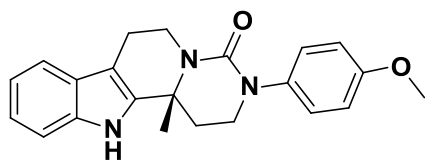

500 MHz,  $[\text{D}_6]\text{DMSO}$

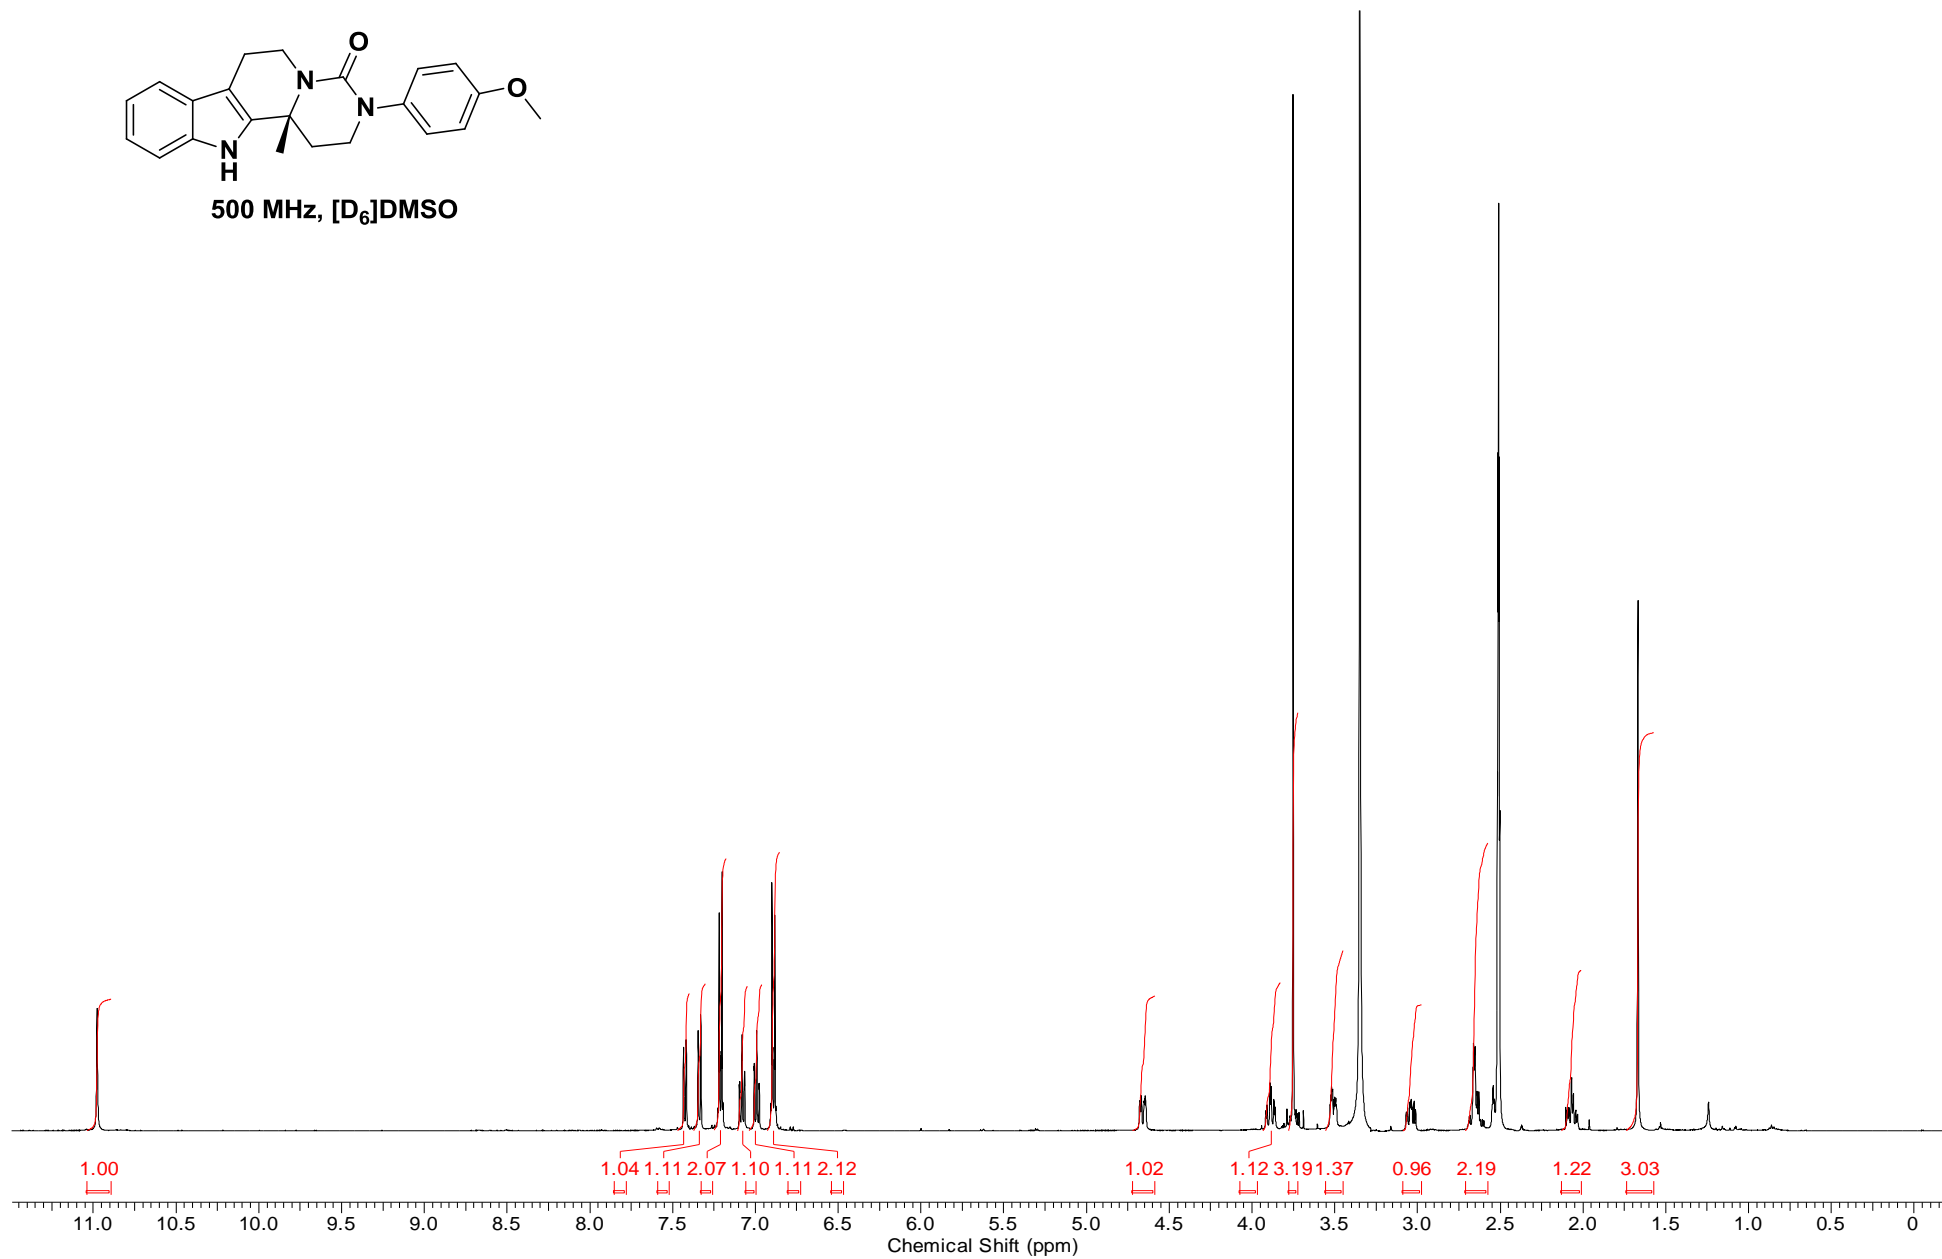

### 4.21.2 $^{13}\text{C}$ NMR of compound 9u

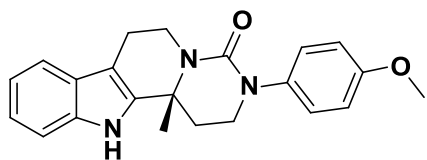

125 MHz,  $[\text{D}_6]\text{DMSO}$

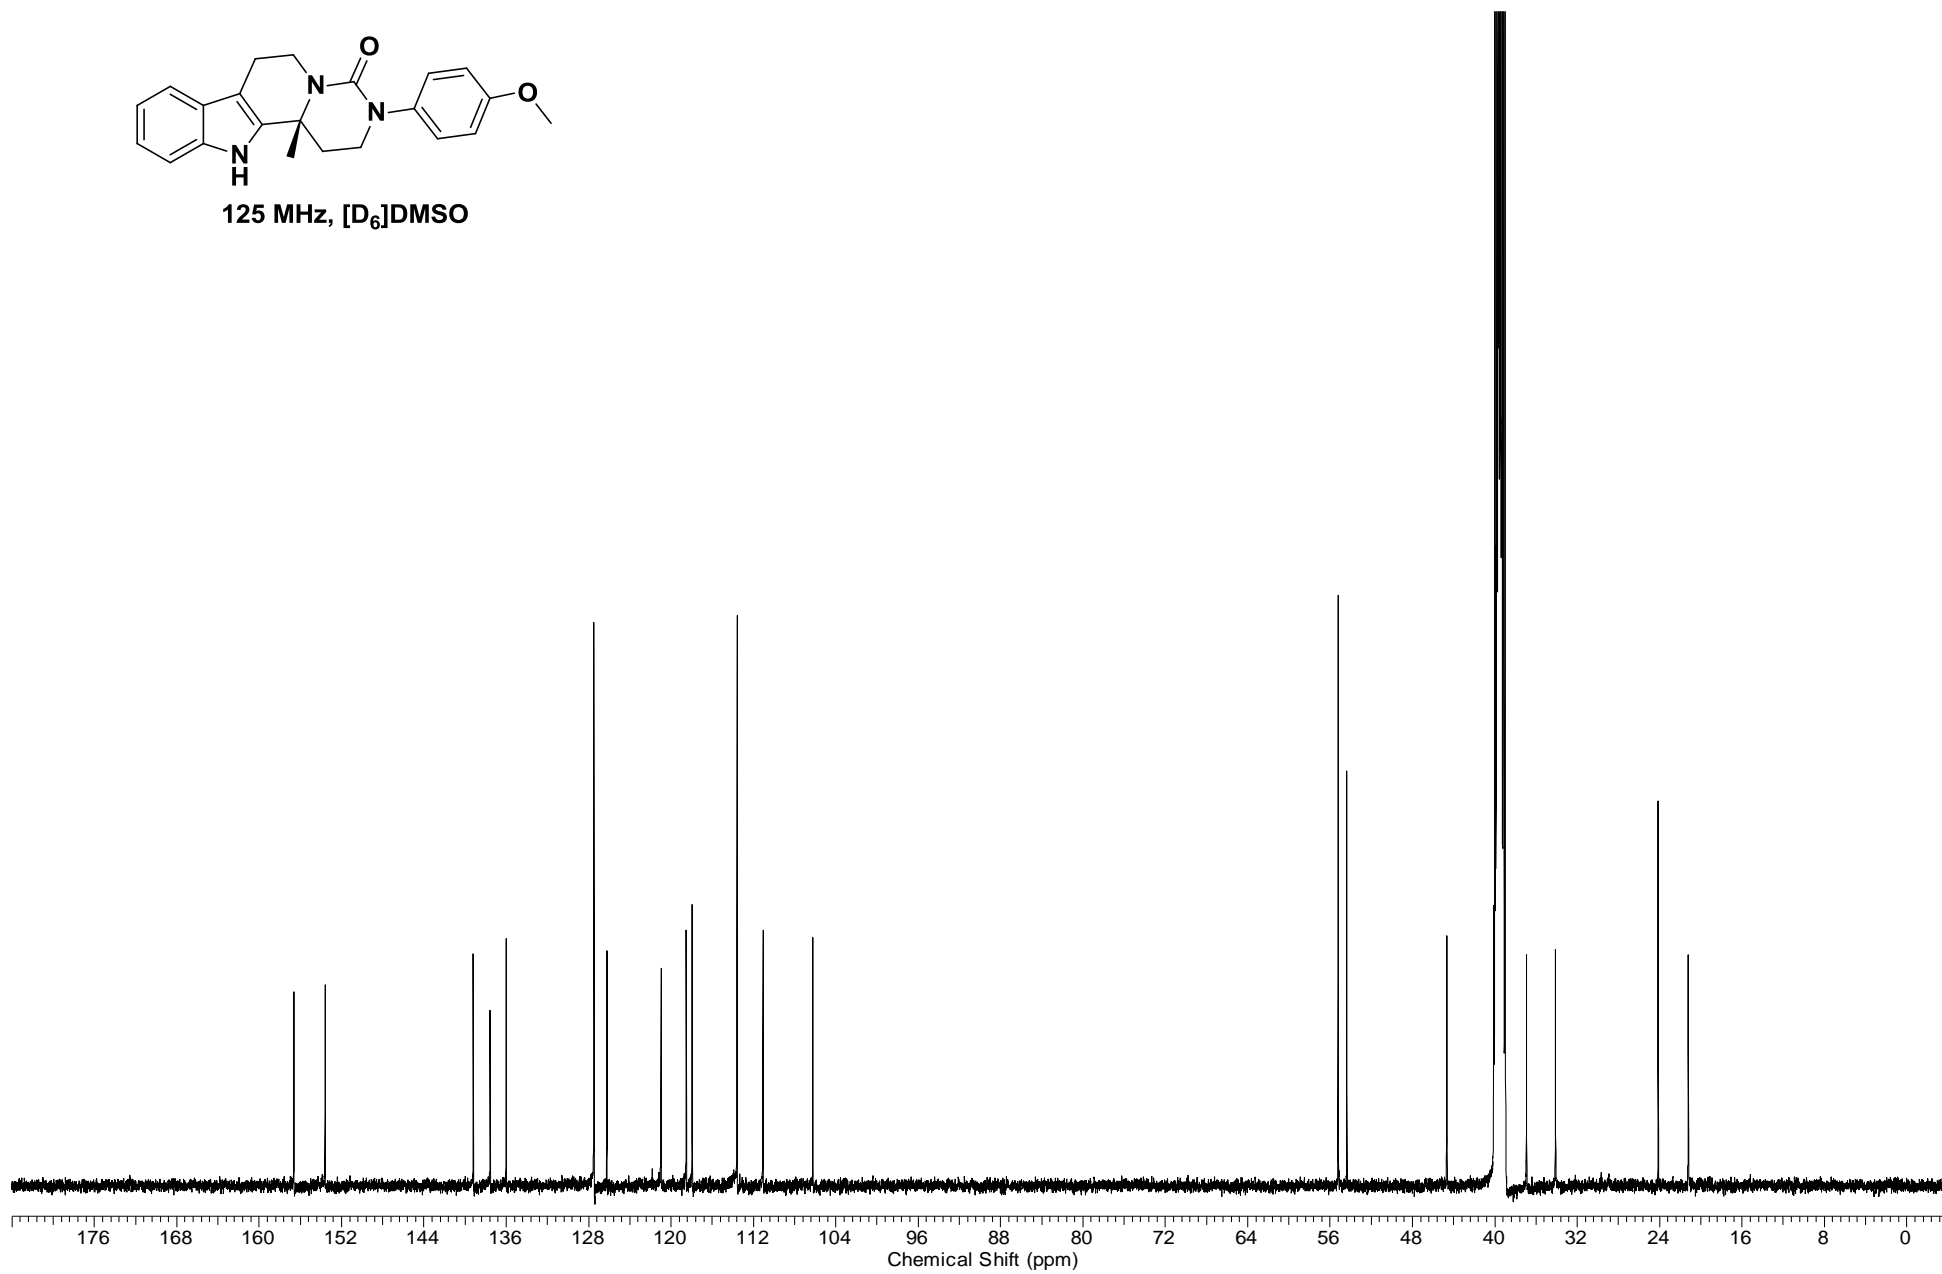

### 4.22.1 $^1\text{H}$ NMR of compound 9v

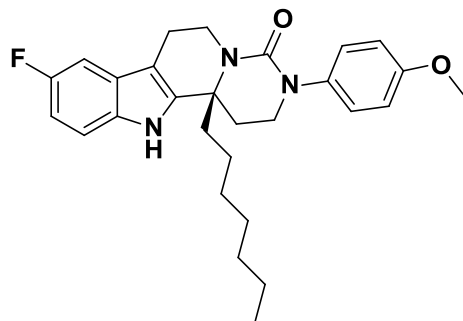

500 MHz, [D<sub>6</sub>]DMSO

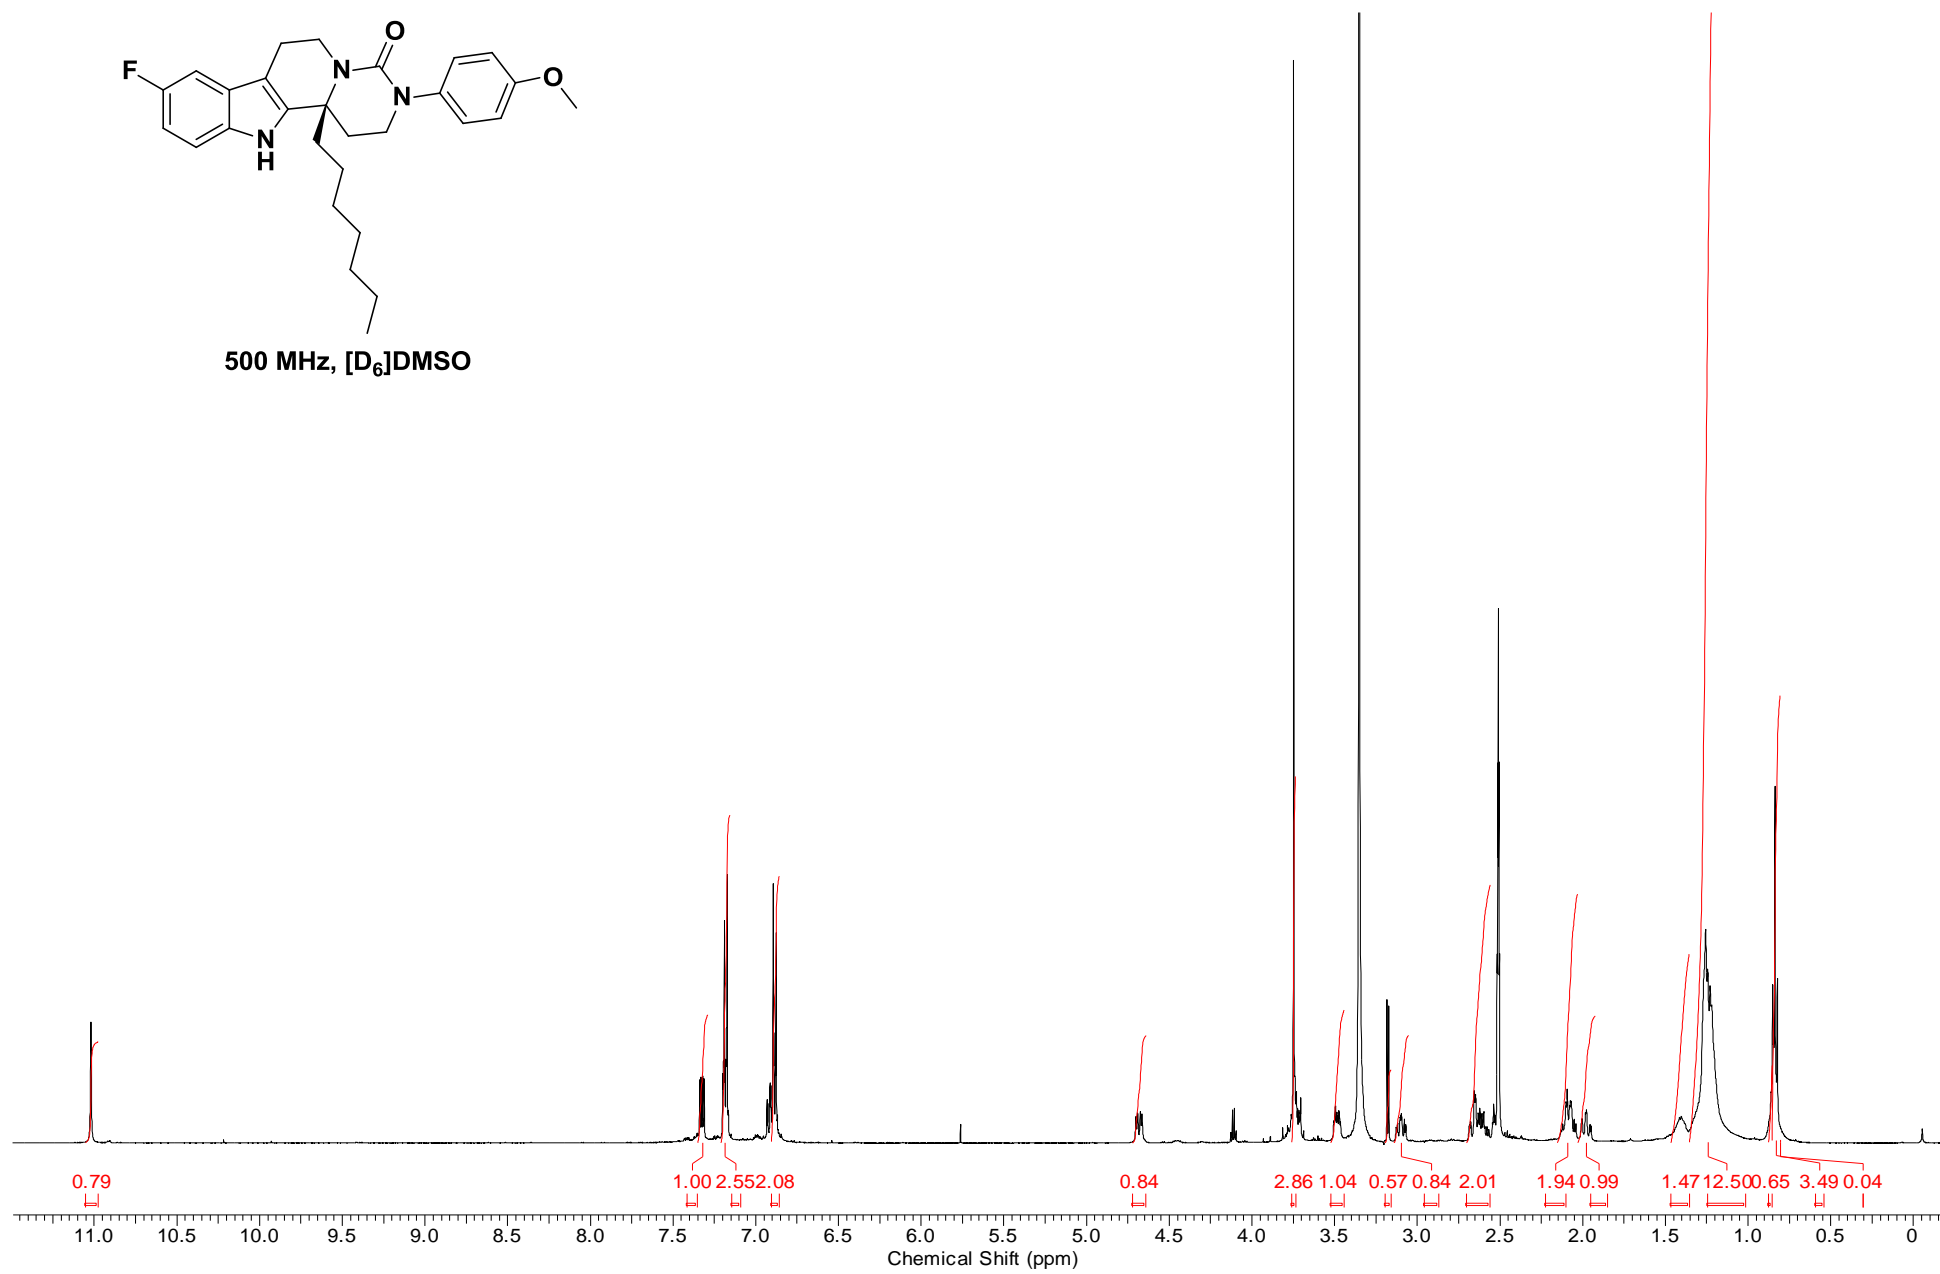

### 4.22.2 $^{13}\text{C}$ NMR of compound 9v

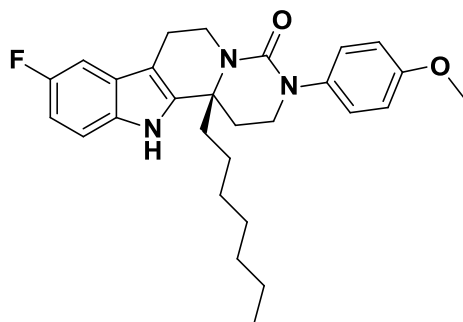

125 MHz,  $[\text{D}_6]\text{DMSO}$

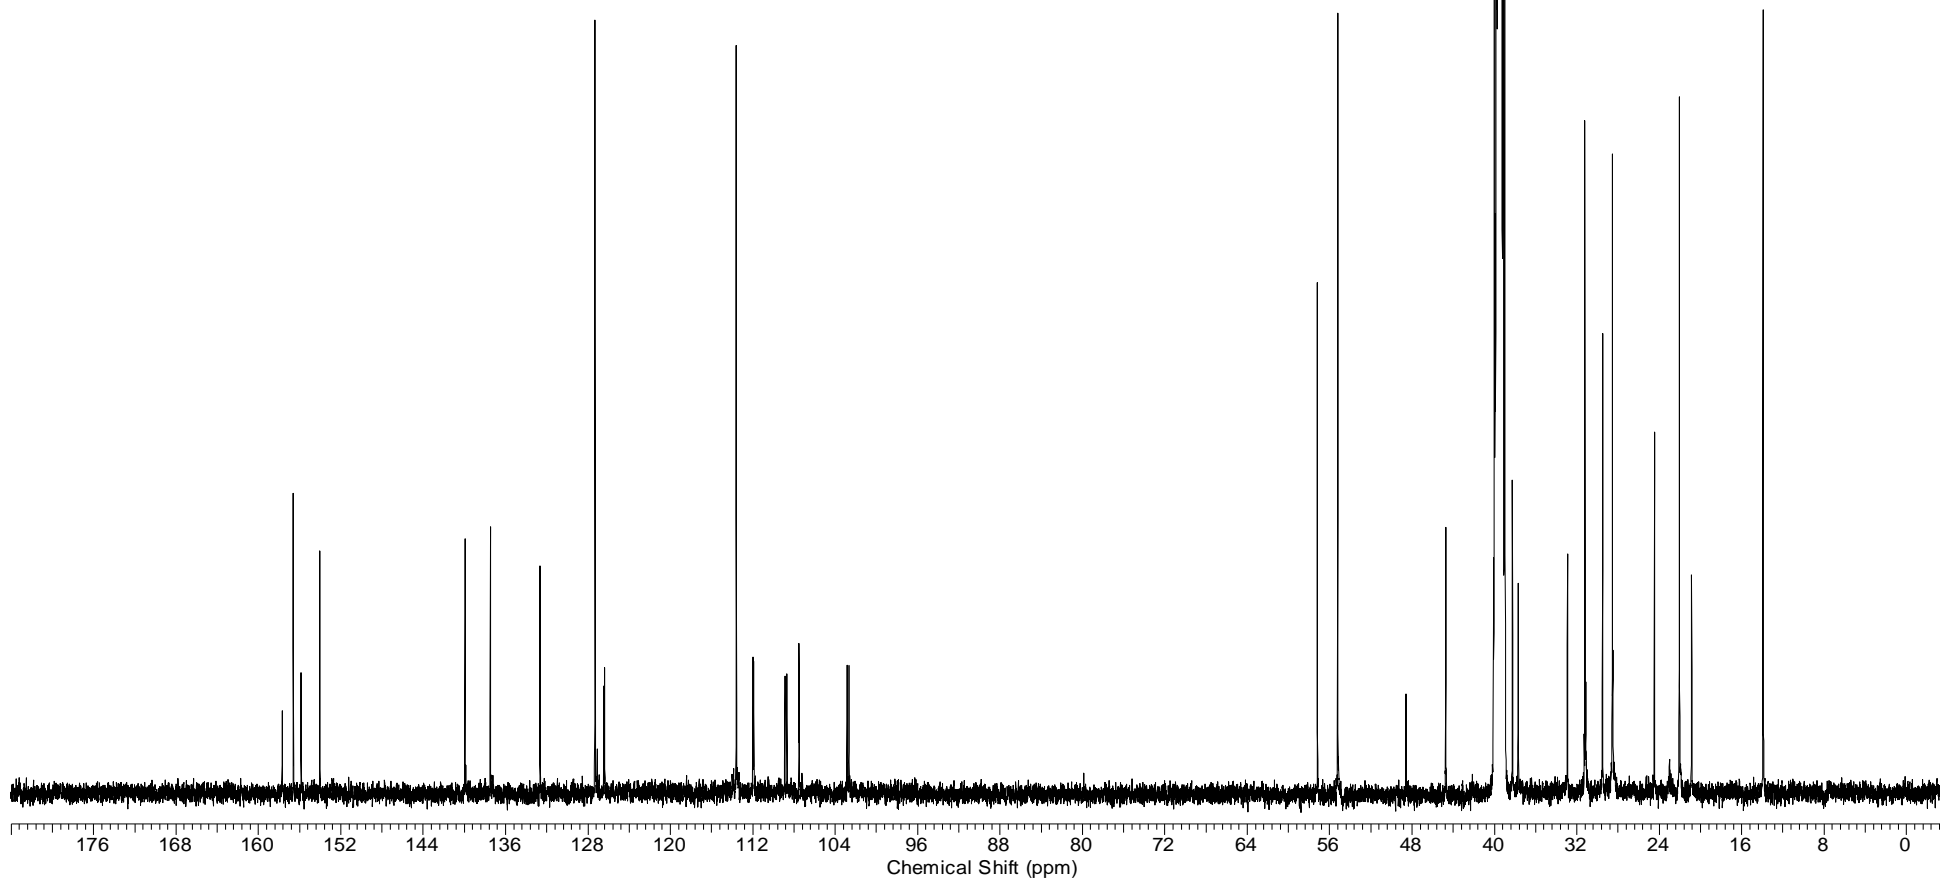



### 4.23.1 $^1\text{H}$ NMR of compound 9w

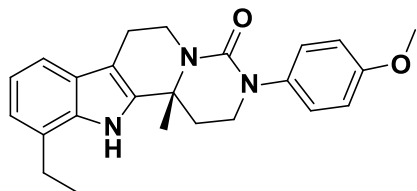

500 MHz,  $[\text{D}_6]\text{DMSO}$

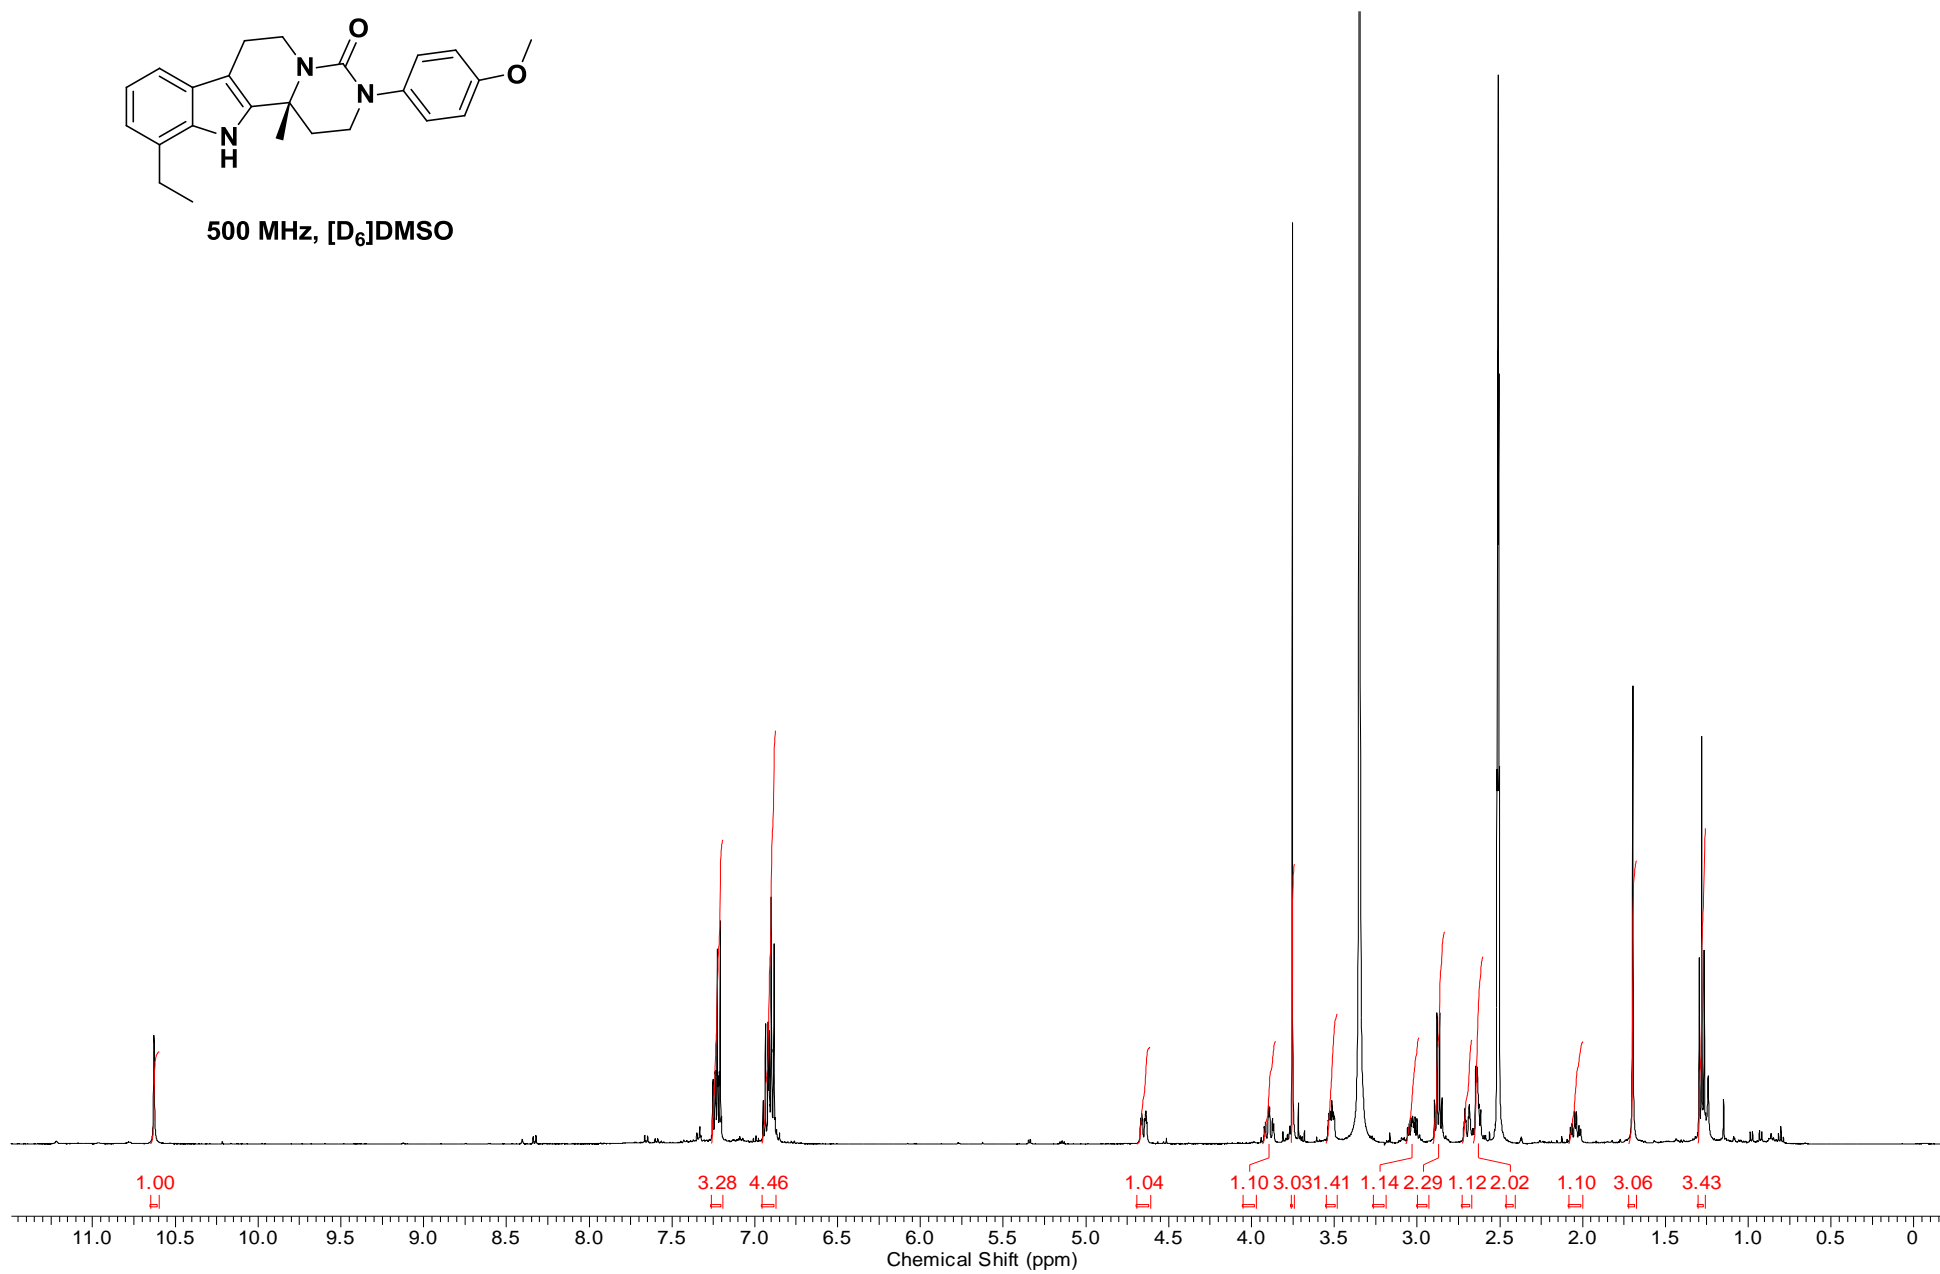

### 4.23.2 $^{13}\text{C}$ NMR of compound 9w

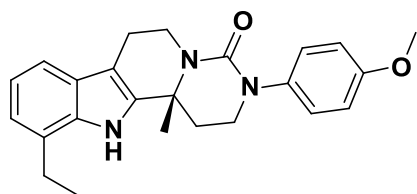

125 MHz,  $[\text{D}_6]\text{DMSO}$

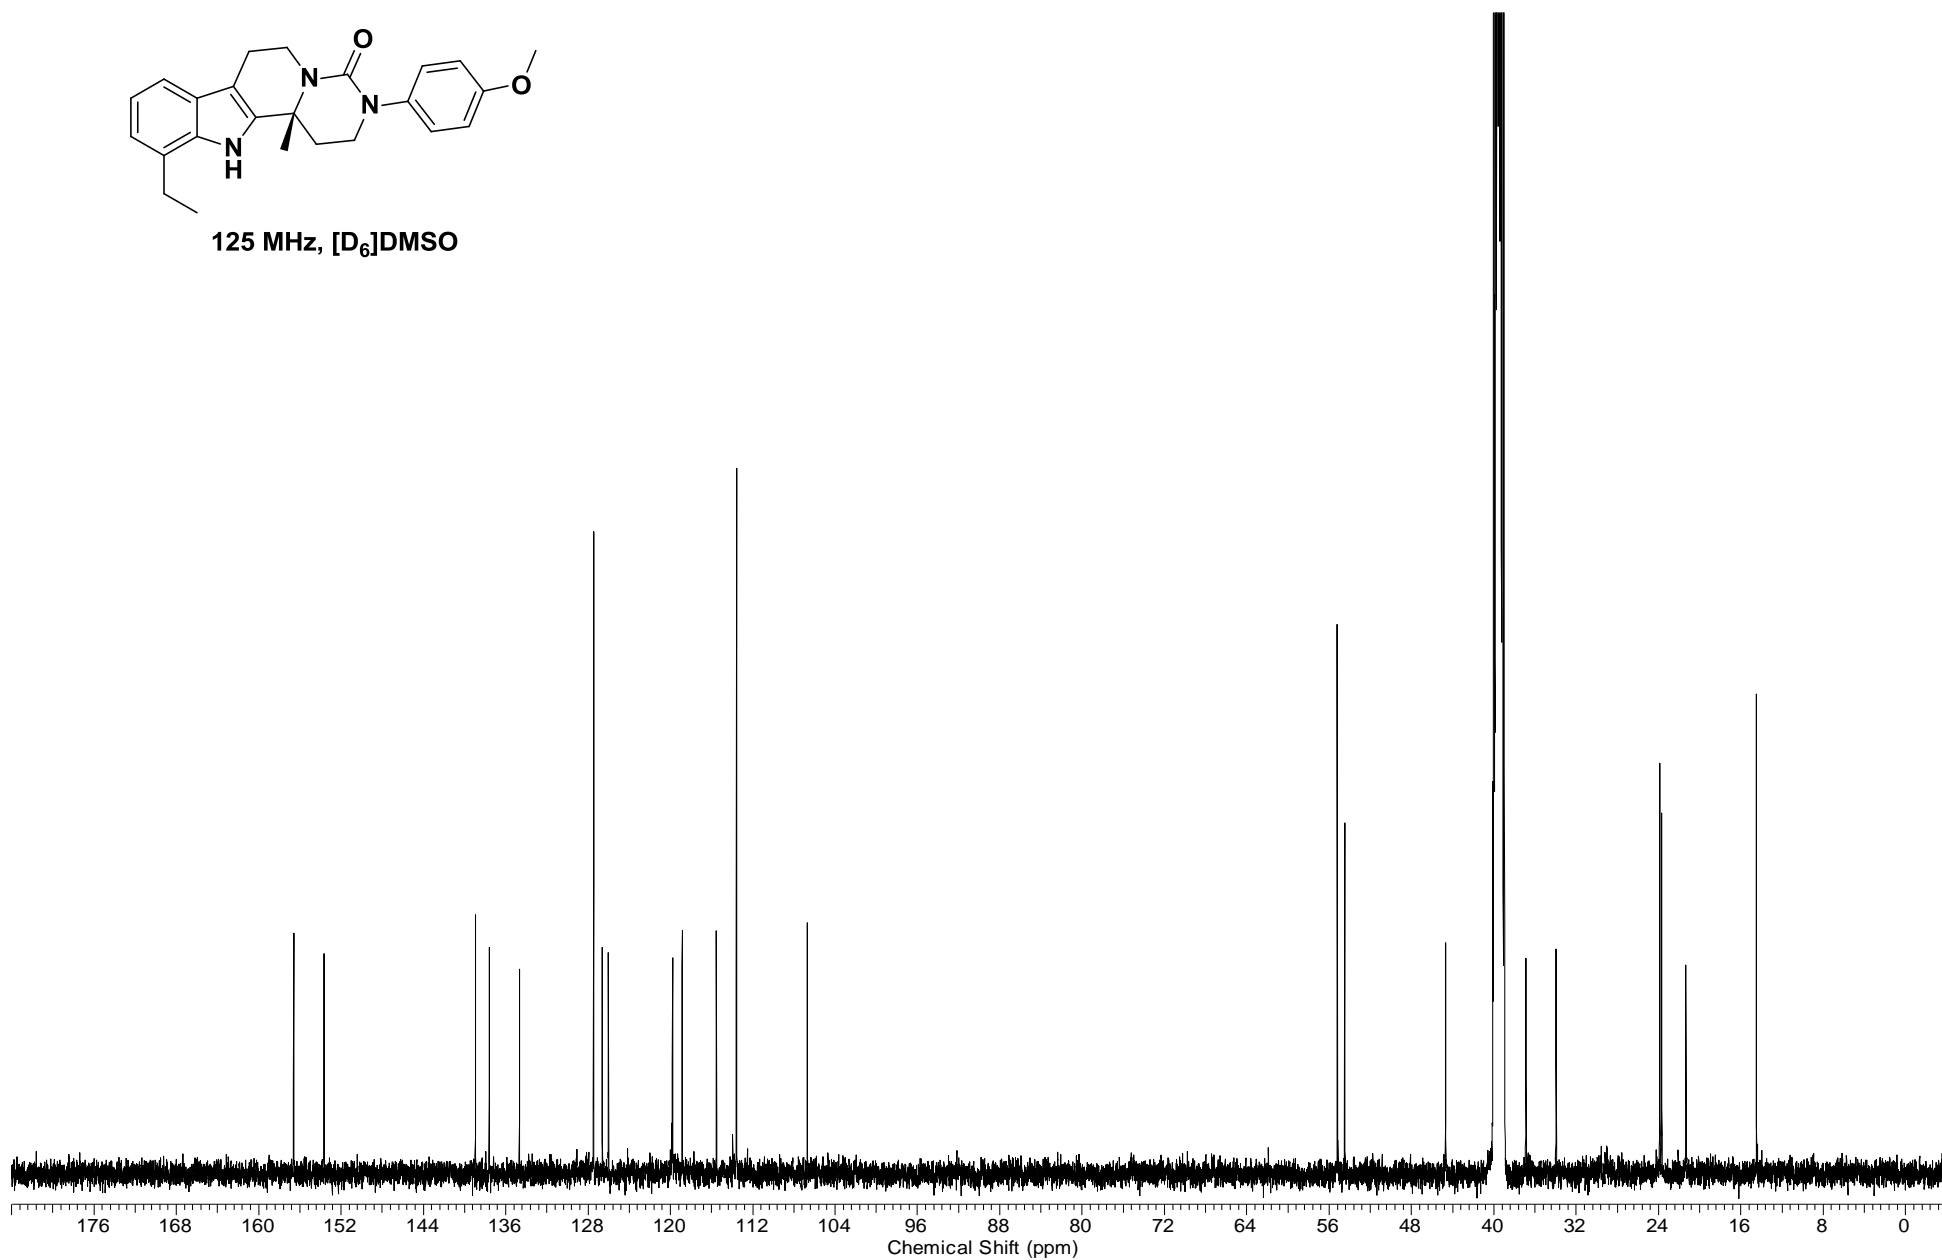



### 5.2.1 HPLC trace of racemic 9b

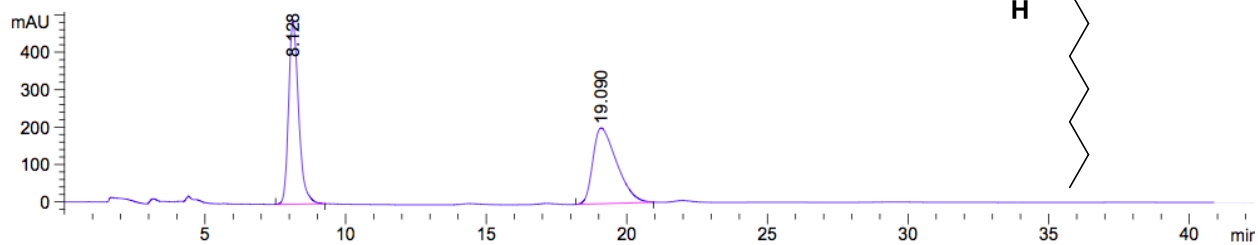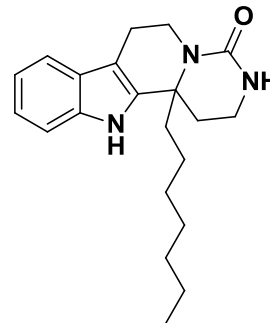

| Peak #   | RetTime [min] | Type | Width [min] | Area [mAU*s] | Height [mAU] | Area %  |
|----------|---------------|------|-------------|--------------|--------------|---------|
| 1        | 8.128         | BB   | 0.3820      | 1.21420e4    | 488.52164    | 50.4201 |
| 2        | 19.090        | BB   | 0.9003      | 1.19397e4    | 202.38368    | 49.5799 |
| Totals : |               |      |             | 2.40817e4    | 690.90532    |         |

### 5.2.2 HPLC trace of enantioenriched 9b

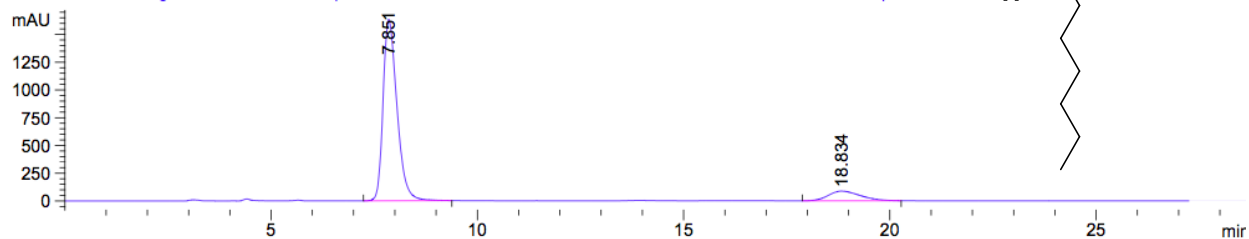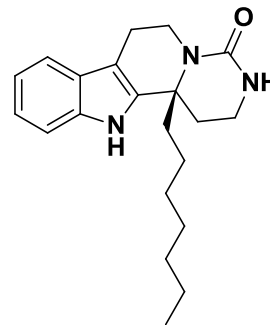

| Peak #   | RetTime [min] | Type | Width [min] | Area [mAU*s] | Height [mAU] | Area %  |
|----------|---------------|------|-------------|--------------|--------------|---------|
| 1        | 7.851         | BB   | 0.3594      | 3.82843e4    | 1633.63770   | 89.1371 |
| 2        | 18.834        | BB   | 0.8287      | 4665.60693   | 86.58440     | 10.8629 |
| Totals : |               |      |             | 4.29499e4    | 1720.22209   |         |

### 5.3.1 HPLC trace of racemic 9c

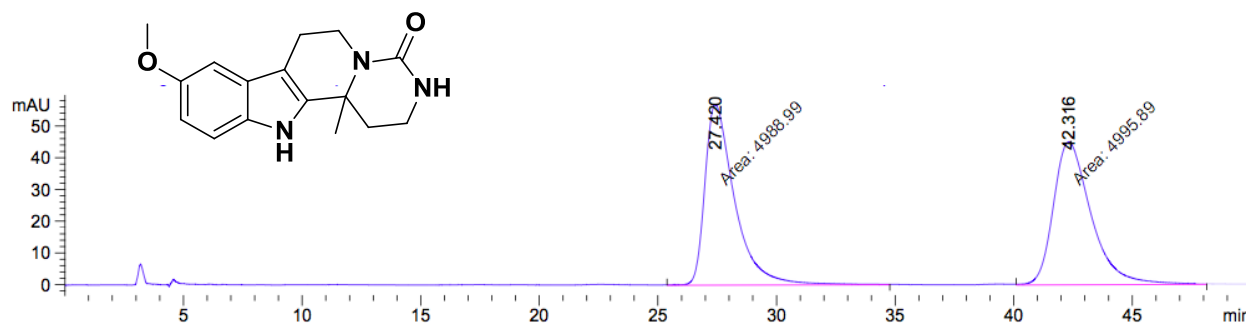

Signal 3: DAD1 C, Sig=220,8 Ref=360,100

| Peak # | RetTime [min] | Type | Width [min] | Area [mAU*s] | Height [mAU] | Area %  |
|--------|---------------|------|-------------|--------------|--------------|---------|
| 1      | 27.420        | MM   | 1.4596      | 4988.99219   | 56.96652     | 49.9655 |
| 2      | 42.316        | MM   | 1.8483      | 4995.88818   | 45.04830     | 50.0345 |

Totals : 9984.88037 102.01482

### 5.3.2 HPLC trace of enantioenriched 9c

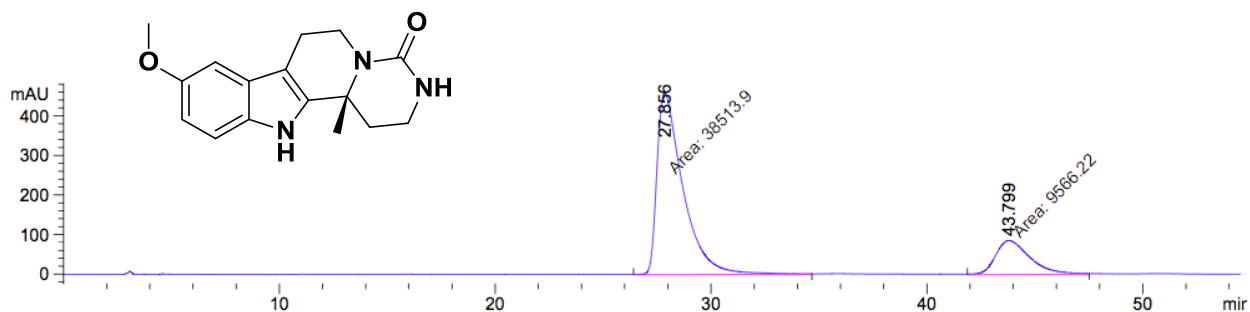

Signal 4: DAD1 D, Sig=220,16 Ref=400,100

| Peak # | RetTime [min] | Type | Width [min] | Area [mAU*s] | Height [mAU] | Area %  |
|--------|---------------|------|-------------|--------------|--------------|---------|
| 1      | 27.856        | MM   | 1.3996      | 3.85139e4    | 458.61905    | 80.1036 |
| 2      | 43.799        | MM   | 1.8588      | 9566.22363   | 85.77356     | 19.8964 |

Totals : 4.80801e4 544.39261

### 5.4.1 HPLC trace of racemic 9d

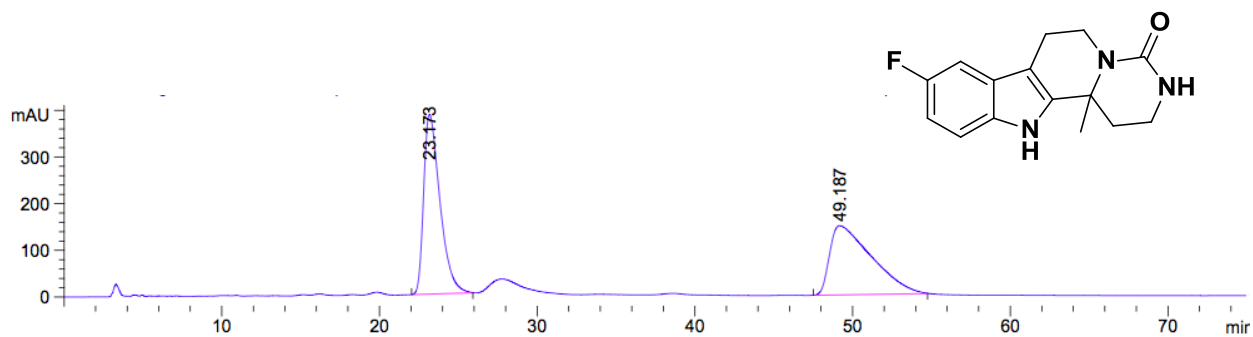

Signal 3: DAD1 C, Sig=220,8 Ref=360,100

| Peak # | RetTime [min] | Type | Width [min] | Area [mAU*s] | Height [mAU] | Area %  |
|--------|---------------|------|-------------|--------------|--------------|---------|
| 1      | 23.173        | BB   | 1.0948      | 2.75907e4    | 384.66782    | 50.3224 |
| 2      | 49.187        | BB   | 2.4675      | 2.72372e4    | 148.11012    | 49.6776 |

Totals : 5.48279e4 532.77794

### 5.4.2 HPLC trace of enantioenriched 9d

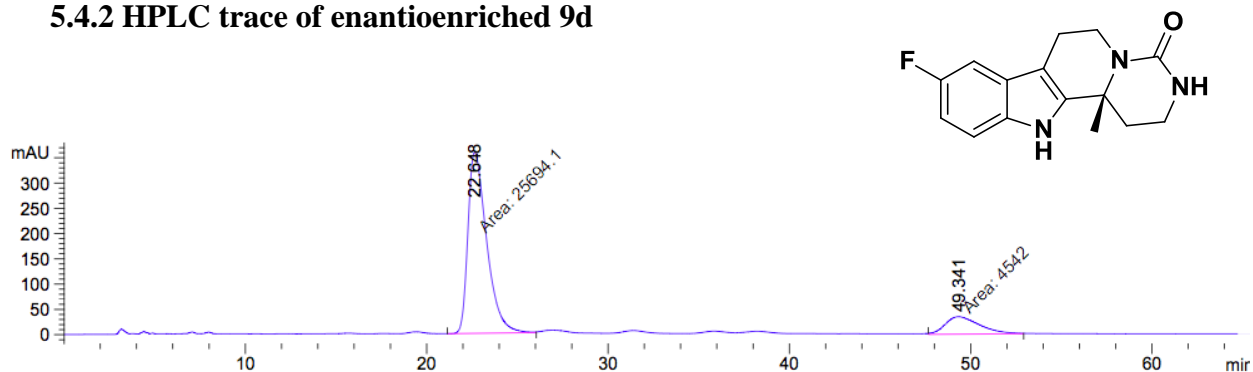

Signal 3: DAD1 C, Sig=220,8 Ref=360,100

| Peak # | RetTime [min] | Type | Width [min] | Area [mAU*s] | Height [mAU] | Area %  |
|--------|---------------|------|-------------|--------------|--------------|---------|
| 1      | 22.648        | MM   | 1.1936      | 2.56941e4    | 358.76926    | 84.9782 |
| 2      | 49.341        | MM   | 2.1947      | 4542.00195   | 34.49198     | 15.0218 |

Totals : 3.02361e4 393.26123

### 5.5.1 HPLC trace of racemic 9e

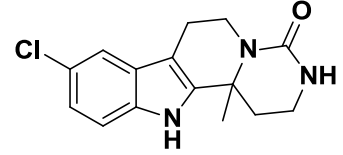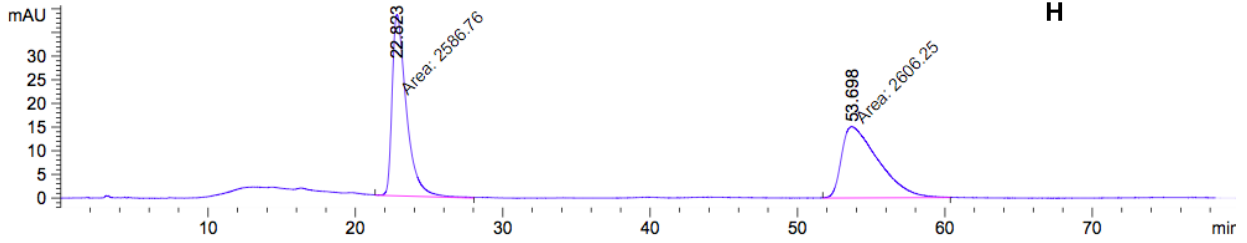

| Peak #   | RetTime [min] | Type | Width [min] | Area [mAU*s] | Height [mAU] | Area %  |
|----------|---------------|------|-------------|--------------|--------------|---------|
| 1        | 22.823        | MM   | 1.1244      | 2586.76172   | 38.34214     | 49.8124 |
| 2        | 53.698        | MM   | 2.8856      | 2606.24707   | 15.05342     | 50.1876 |
| Totals : |               |      |             | 5193.00879   | 53.39557     |         |

### 5.5.2 HPLC trace of enantioenriched 9e

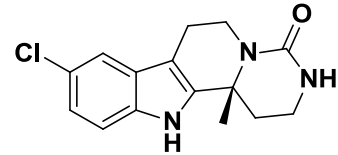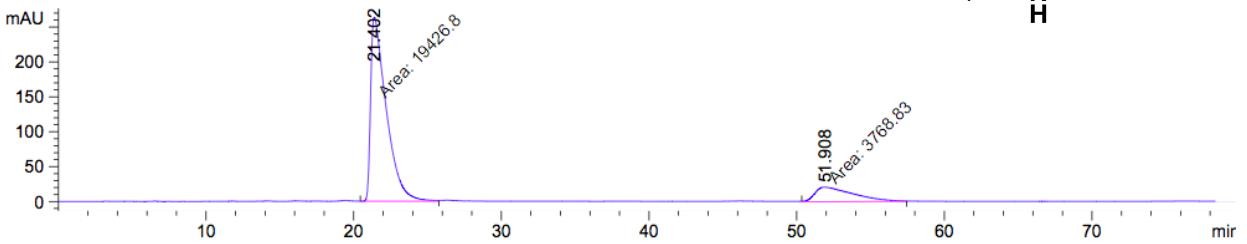

Signal 6: DAD1 F, Sig=300,8 Ref=360,100

| Peak #   | RetTime [min] | Type | Width [min] | Area [mAU*s] | Height [mAU] | Area %  |
|----------|---------------|------|-------------|--------------|--------------|---------|
| 1        | 21.402        | MM   | 1.2289      | 1.94268e4    | 263.47858    | 83.7520 |
| 2        | 51.908        | MM   | 3.0132      | 3768.82812   | 20.84603     | 16.2480 |
| Totals : |               |      |             | 2.31956e4    | 284.32461    |         |

### 5.6.1 HPLC trace of racemic 9f

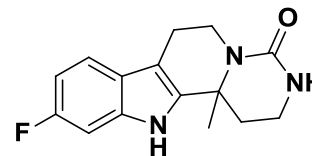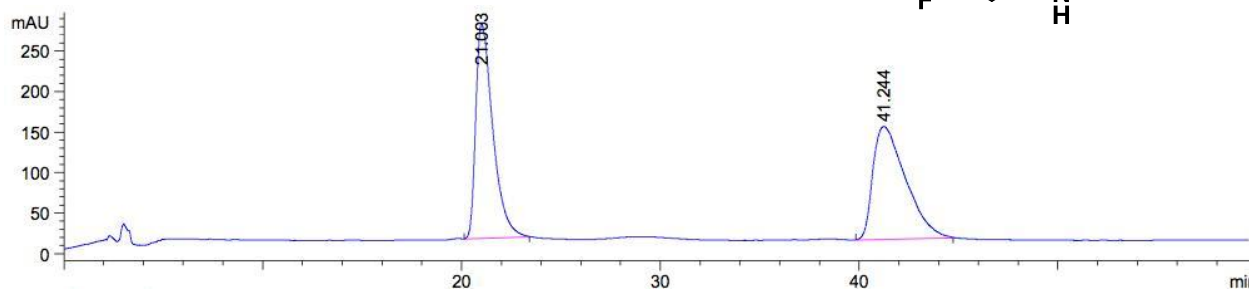

Signal 4: DAD1 D, Sig=220,16 Ref=360,100

| Peak #   | RetTime [min] | Type | Width [min] | Area [mAU*s] | Height [mAU] | Area %  |
|----------|---------------|------|-------------|--------------|--------------|---------|
| 1        | 21.003        | BB   | 0.8935      | 1.58425e4    | 265.37149    | 49.8814 |
| 2        | 41.244        | BB   | 1.5860      | 1.59178e4    | 139.10960    | 50.1186 |
| Totals : |               |      |             | 3.17603e4    | 404.48109    |         |

### 5.6.2 HPLC trace of enantioenriched 9f

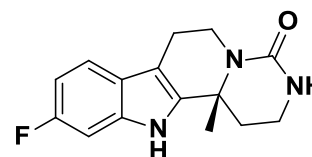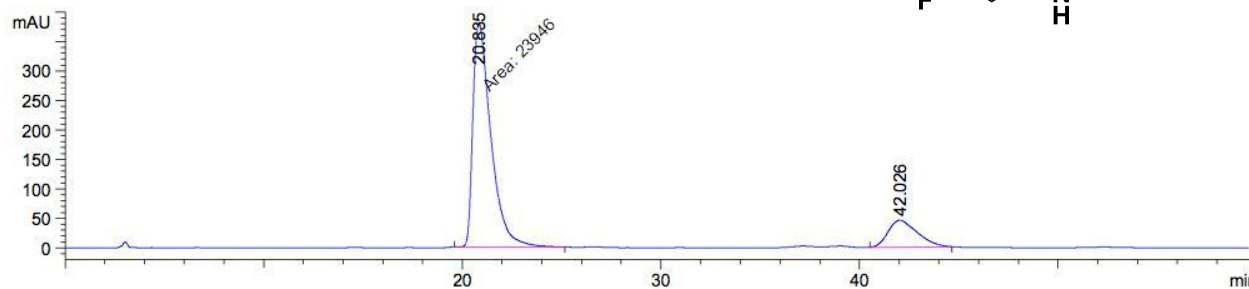

Signal 4: DAD1 D, Sig=220,16 Ref=360,100

| Peak #   | RetTime [min] | Type | Width [min] | Area [mAU*s] | Height [mAU] | Area %  |
|----------|---------------|------|-------------|--------------|--------------|---------|
| 1        | 20.835        | MM   | 1.0511      | 2.39460e4    | 379.69293    | 83.7027 |
| 2        | 42.026        | BB   | 1.3622      | 4662.39063   | 45.74164     | 16.2973 |
| Totals : |               |      |             | 2.86084e4    | 425.43457    |         |



### 5.7.1 HPLC trace of racemic 9g

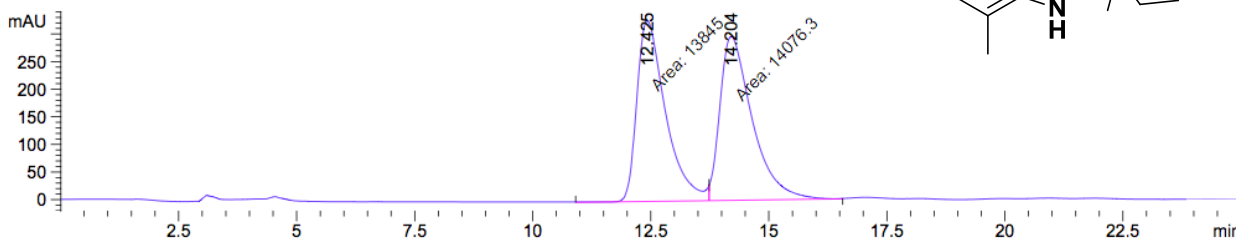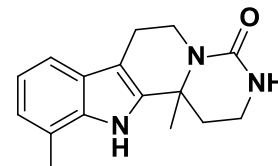

Signal 3: DAD1 C, Sig=220,8 Ref=360,100

| Peak # | RetTime [min] | Type | Width [min] | Area [mAU*s] | Height [mAU] | Area %  |
|--------|---------------|------|-------------|--------------|--------------|---------|
| 1      | 12.425        | MF   | 0.7049      | 1.38450e4    | 327.35123    | 49.5858 |
| 2      | 14.204        | FM   | 0.7906      | 1.40763e4    | 296.74359    | 50.4142 |

Totals : 2.79213e4 624.09482

### 5.7.2 HPLC trace of enantioenriched 9g

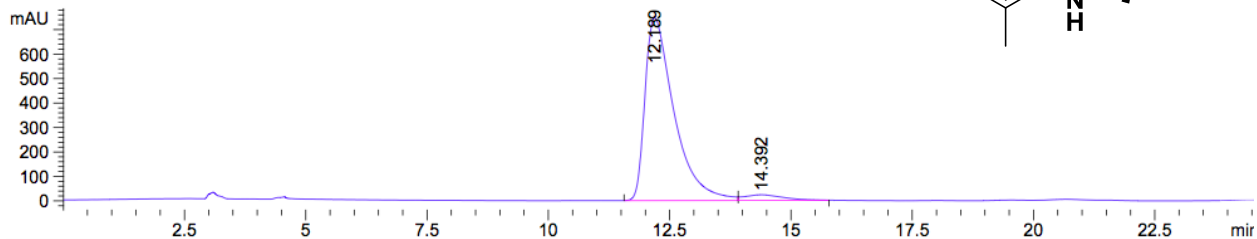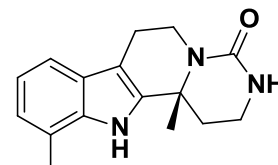

Signal 3: DAD1 C, Sig=220,8 Ref=360,100

| Peak # | RetTime [min] | Type | Width [min] | Area [mAU*s] | Height [mAU] | Area %  |
|--------|---------------|------|-------------|--------------|--------------|---------|
| 1      | 12.189        | BB   | 0.6222      | 3.11330e4    | 747.04541    | 96.1247 |
| 2      | 14.392        | BB   | 0.7902      | 1255.12329   | 22.80222     | 3.8753  |

Totals : 3.23881e4 769.84763

### 5.8.1 HPLC trace of racemic 9h

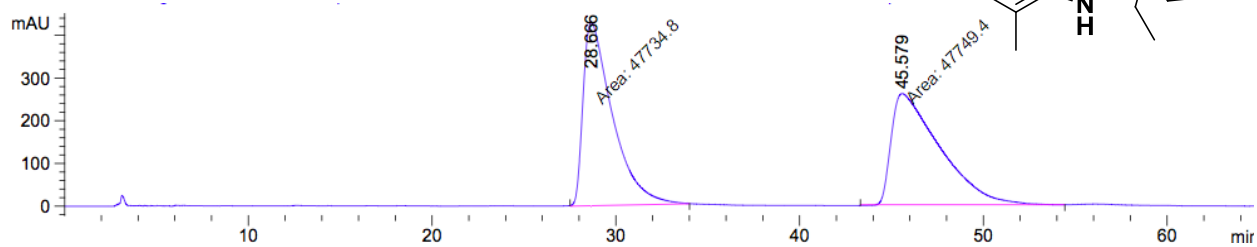

Signal 3: DAD1 C, Sig=220,8 Ref=360,100

| Peak #   | RetTime [min] | Type | Width [min] | Area [mAU*s] | Height [mAU] | Area %  |
|----------|---------------|------|-------------|--------------|--------------|---------|
| 1        | 28.666        | MM   | 1.8568      | 4.77348e4    | 428.45740    | 49.9924 |
| 2        | 45.579        | MM   | 3.0576      | 4.77494e4    | 260.27856    | 50.0076 |
| Totals : |               |      |             | 9.54842e4    | 688.73596    |         |

### 5.8.2 HPLC trace of enantioenriched 9h

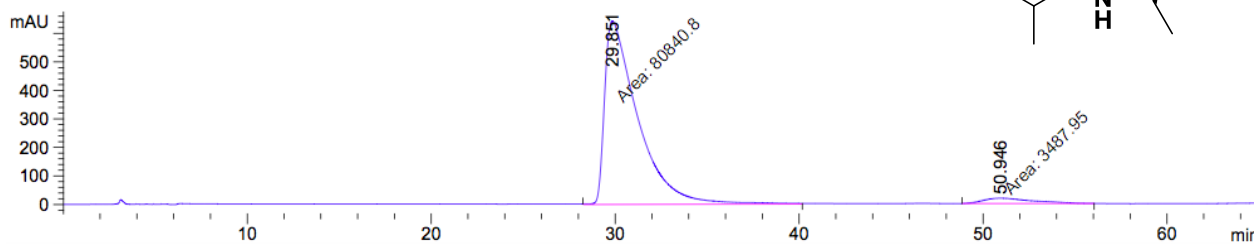

Signal 3: DAD1 C, Sig=220,8 Ref=360,100

| Peak #   | RetTime [min] | Type | Width [min] | Area [mAU*s] | Height [mAU] | Area %  |
|----------|---------------|------|-------------|--------------|--------------|---------|
| 1        | 29.851        | MM   | 2.0953      | 8.08408e4    | 643.03217    | 95.8639 |
| 2        | 50.946        | MM   | 3.1174      | 3487.94824   | 18.64770     | 4.1361  |
| Totals : |               |      |             | 8.43287e4    | 661.67986    |         |

### 5.9.1 HPLC trace of racemic 9i

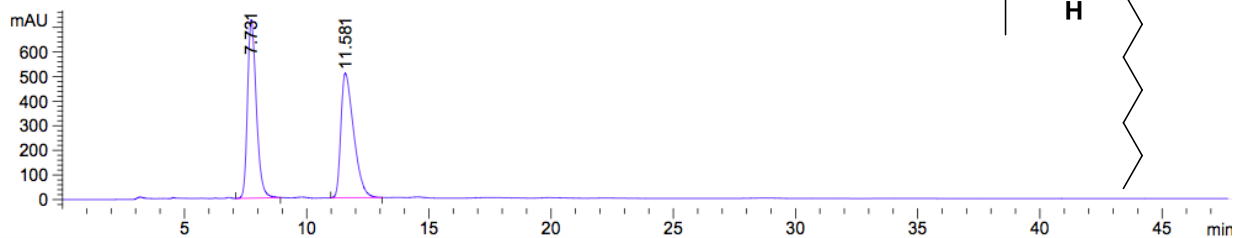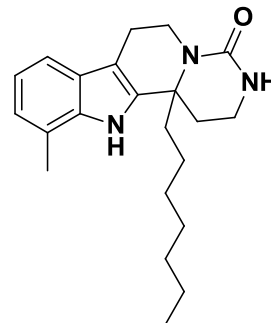

Signal 3: DAD1 C, Sig=220,8 Ref=360,100

| Peak # | RetTime [min] | Type | Width [min] | Area [mAU*s] | Height [mAU] | Area %  |
|--------|---------------|------|-------------|--------------|--------------|---------|
| 1      | 7.731         | VB   | 0.3864      | 1.81636e4    | 724.63928    | 49.7133 |
| 2      | 11.581        | BB   | 0.5562      | 1.83731e4    | 505.28064    | 50.2867 |

Totals : 3.65367e4 1229.91992

### 5.9.2 HPLC trace of enantioenriched 9i

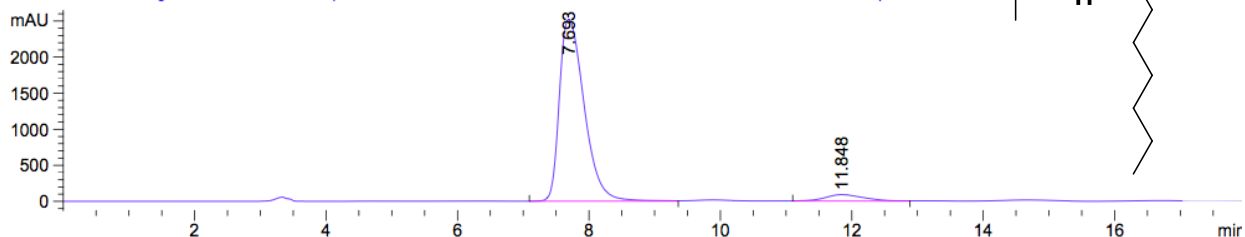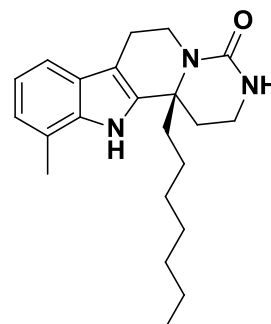

Signal 3: DAD1 C, Sig=220,8 Ref=360,100

| Peak # | RetTime [min] | Type | Width [min] | Area [mAU*s] | Height [mAU] | Area %  |
|--------|---------------|------|-------------|--------------|--------------|---------|
| 1      | 7.693         | BB   | 0.4075      | 6.59833e4    | 2519.54248   | 94.9799 |
| 2      | 11.848        | BB   | 0.5960      | 3487.51880   | 88.07508     | 5.0201  |

Totals : 6.94708e4 2607.61756

### 5.10.1 HPLC trace of racemic 9j

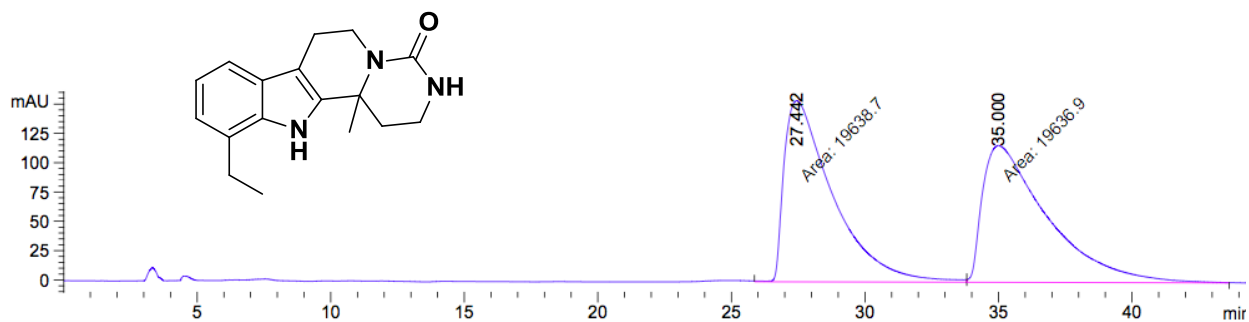

Signal 3: DAD1 C, Sig=220,8 Ref=360,100

| Peak # | RetTime [min] | Type | Width [min] | Area [mAU*s] | Height [mAU] | Area %  |
|--------|---------------|------|-------------|--------------|--------------|---------|
| 1      | 27.442        | MF   | 2.1193      | 1.96387e4    | 154.44676    | 50.0023 |
| 2      | 35.000        | FM   | 2.8073      | 1.96369e4    | 116.58168    | 49.9977 |

Totals : 3.92756e4 271.02844

### 5.10.2 HPLC trace of enantioenriched 9j

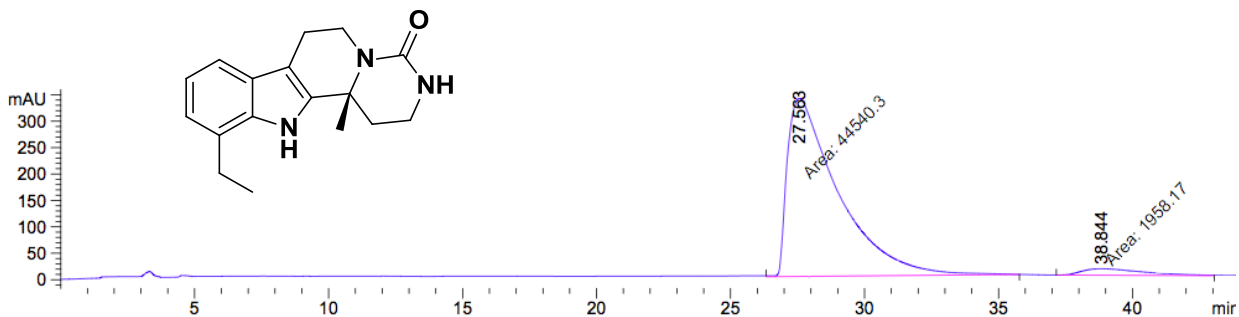

Signal 3: DAD1 C, Sig=220,8 Ref=360,100

| Peak # | RetTime [min] | Type | Width [min] | Area [mAU*s] | Height [mAU] | Area %  |
|--------|---------------|------|-------------|--------------|--------------|---------|
| 1      | 27.563        | MM   | 2.2048      | 4.45403e4    | 336.69745    | 95.7887 |
| 2      | 38.844        | MM   | 2.6787      | 1958.16724   | 12.18364     | 4.2113  |

Totals : 4.64985e4 348.88109

### 5.11.1 HPLC trace of racemic 9k

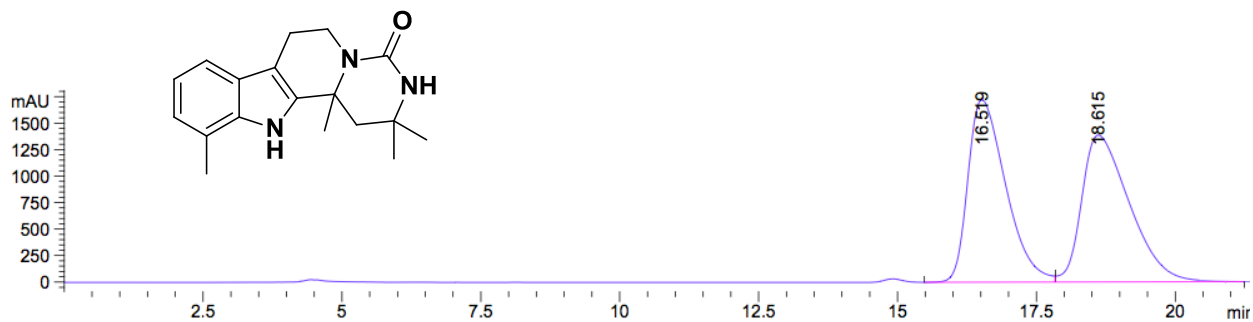

Signal 2: DAD1 B, Sig=220,8 Ref=360,100

| Peak #   | RetTime [min] | Type | Width [min] | Area [mAU*s] | Height [mAU] | Area %  |
|----------|---------------|------|-------------|--------------|--------------|---------|
| 1        | 16.519        | VV   | 0.7301      | 8.15249e4    | 1722.64880   | 49.6028 |
| 2        | 18.615        | VB   | 0.9171      | 8.28304e4    | 1386.34863   | 50.3972 |
| Totals : |               |      |             | 1.64355e5    | 3108.99744   |         |

### 5.11.2 HPLC trace of enantioenriched 9k

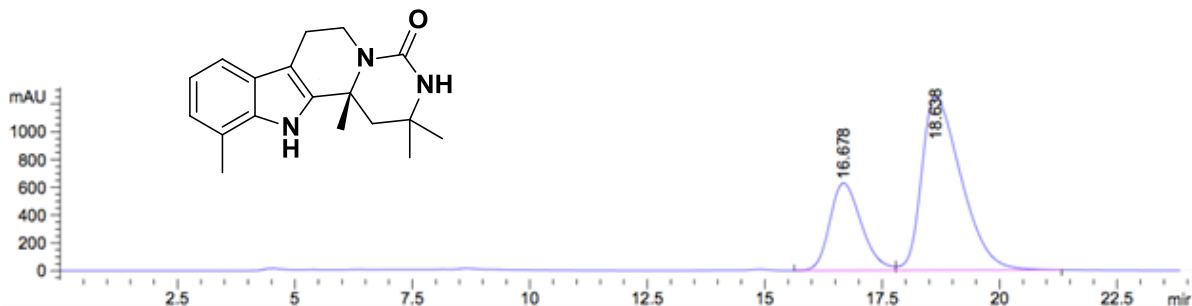

Signal 2: DAD1 B, Sig=220,8 Ref=360,100

| Peak #   | RetTime [min] | Type | Width [min] | Area [mAU*s] | Height [mAU] | Area %  |
|----------|---------------|------|-------------|--------------|--------------|---------|
| 1        | 16.678        | BV   | 0.7231      | 2.93723e4    | 628.60034    | 28.6708 |
| 2        | 18.638        | VB   | 0.8953      | 7.30743e4    | 1251.29919   | 71.3292 |
| Totals : |               |      |             | 1.02447e5    | 1879.89954   |         |

### 5.12.1 HPLC trace of racemic 9l

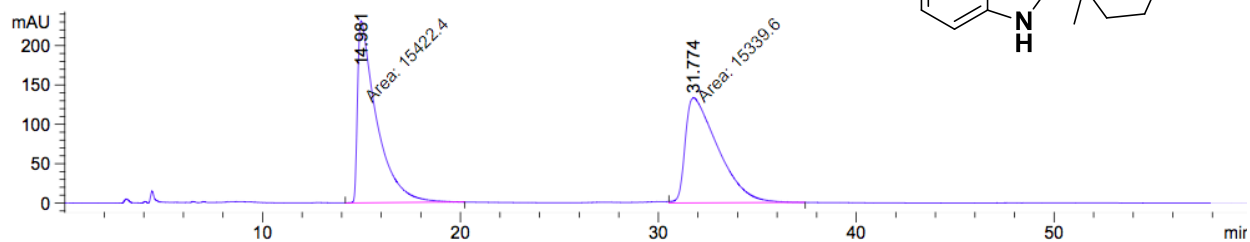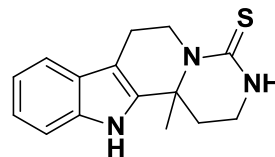

Signal 5: DAD1 E, Sig=240,8 Ref=360,100

| Peak # | RetTime [min] | Type | Width [min] | Area [mAU*s] | Height [mAU] | Area %  |
|--------|---------------|------|-------------|--------------|--------------|---------|
| 1      | 14.981        | MM   | 1.1128      | 1.54224e4    | 230.97691    | 50.1347 |
| 2      | 31.774        | MM   | 1.9148      | 1.53396e4    | 133.51459    | 49.8653 |

Totals : 3.07620e4 364.49150

### 5.12.2 HPLC trace of enantioenriched 9l

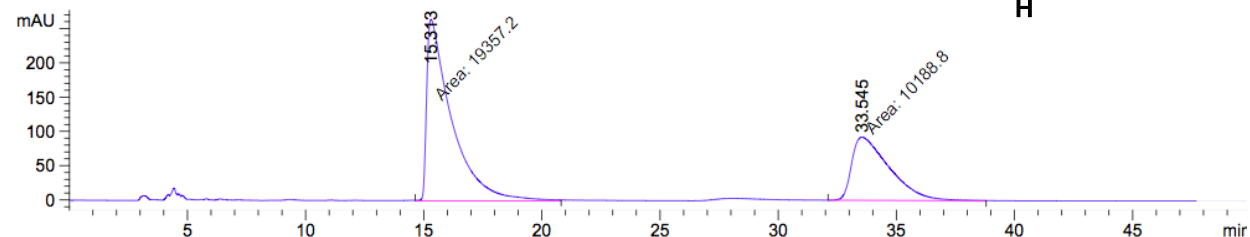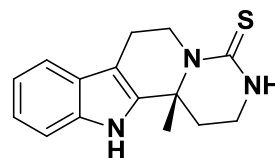

Signal 5: DAD1 E, Sig=240,8 Ref=360,100

| Peak # | RetTime [min] | Type | Width [min] | Area [mAU*s] | Height [mAU] | Area %  |
|--------|---------------|------|-------------|--------------|--------------|---------|
| 1      | 15.313        | MM   | 1.2197      | 1.93572e4    | 264.50677    | 65.5154 |
| 2      | 33.545        | MM   | 1.8424      | 1.01888e4    | 92.16838     | 34.4846 |

Totals : 2.95459e4 356.67516

### 5.13.1 HPLC trace of racemic 9m

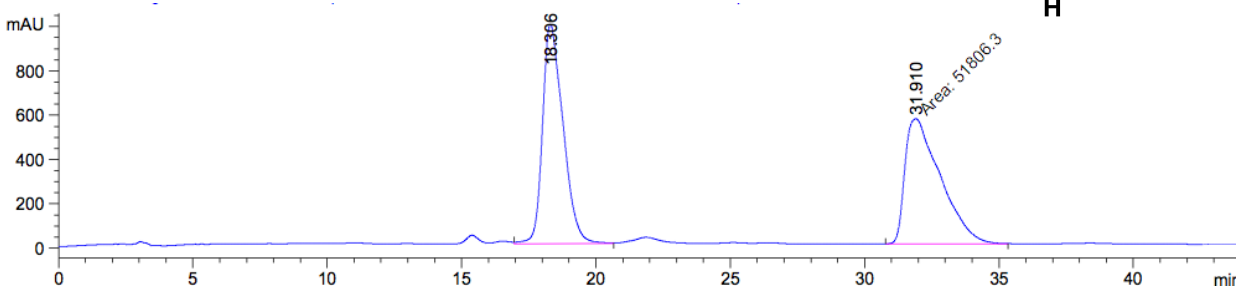

Signal 4: DAD1 D, Sig=220,16 Ref=360,100

| Peak # | RetTime [min] | Type | Width [min] | Area [mAU*s] | Height [mAU] | Area %  |
|--------|---------------|------|-------------|--------------|--------------|---------|
| 1      | 18.306        | VB   | 0.7677      | 5.26164e4    | 990.61047    | 50.3879 |
| 2      | 31.910        | MM   | 1.5287      | 5.18063e4    | 564.81622    | 49.6121 |

Totals : 1.04423e5 1555.42670

### 5.13.2 HPLC trace of enantioenriched 9m

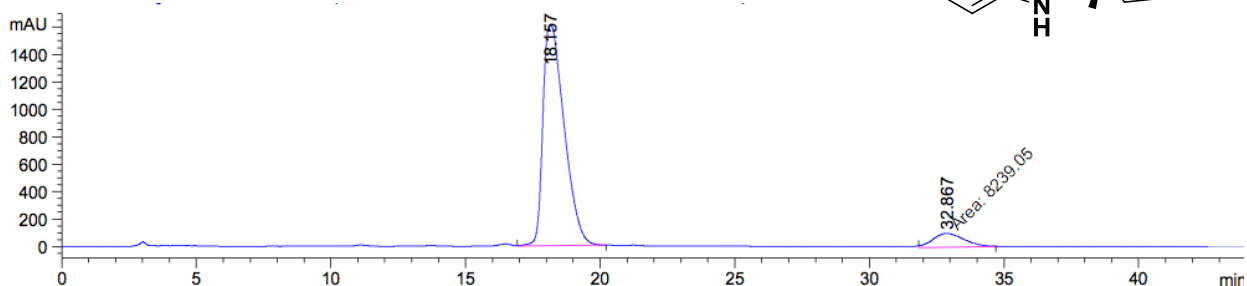

Signal 4: DAD1 D, Sig=220,16 Ref=360,100

| Peak # | RetTime [min] | Type | Width [min] | Area [mAU*s] | Height [mAU] | Area %  |
|--------|---------------|------|-------------|--------------|--------------|---------|
| 1      | 18.157        | VB   | 0.8547      | 8.84266e4    | 1615.15283   | 91.4768 |
| 2      | 32.867        | MM   | 1.3423      | 8239.05469   | 102.30173    | 8.5232  |

Totals : 9.66657e4 1717.45456

### 5.14.1 HPLC trace of racemic 9n

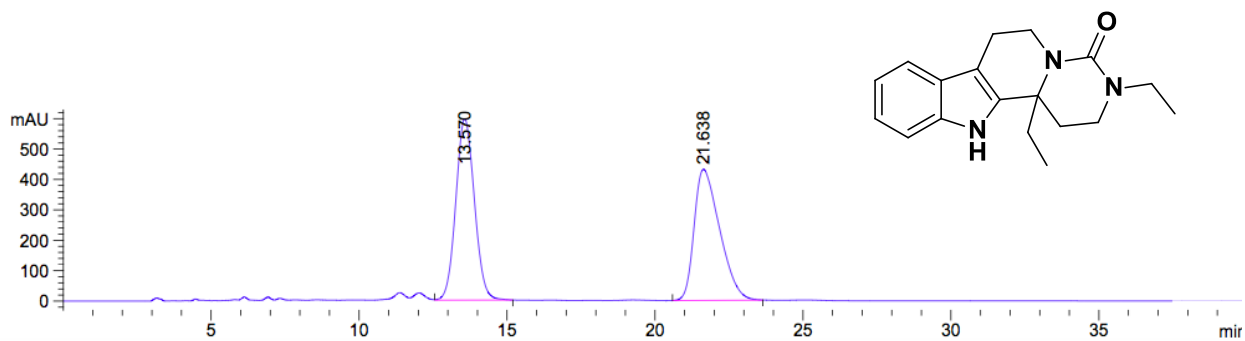

Signal 3: DAD1 C, Sig=220,8 Ref=360,100

| Peak # | RetTime [min] | Type | Width [min] | Area [mAU*s] | Height [mAU] | Area %  |
|--------|---------------|------|-------------|--------------|--------------|---------|
| 1      | 13.570        | VB   | 0.6803      | 2.60506e4    | 595.58911    | 50.2209 |
| 2      | 21.638        | BB   | 0.9189      | 2.58214e4    | 431.04242    | 49.7791 |

Totals : 5.18720e4 1026.63153

### 5.14.2 HPLC trace of enantioenriched 9n

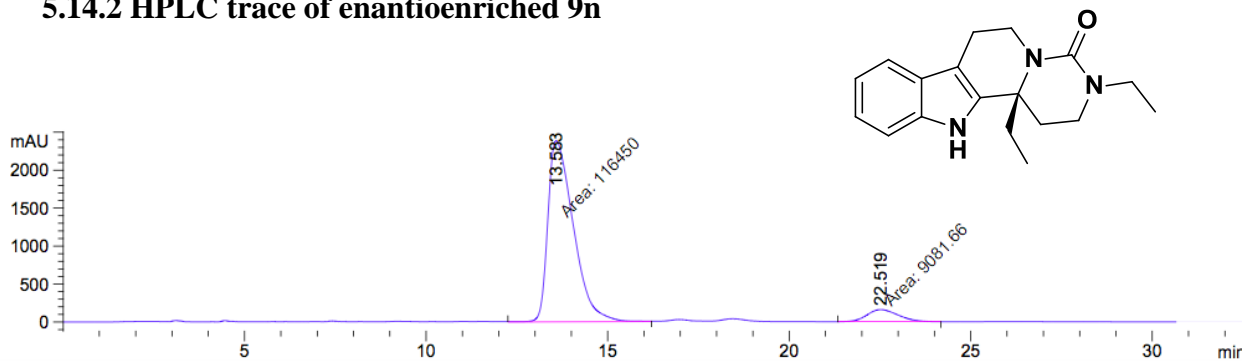

Signal 3: DAD1 C, Sig=220,8 Ref=360,100

| Peak # | RetTime [min] | Type | Width [min] | Area [mAU*s] | Height [mAU] | Area %  |
|--------|---------------|------|-------------|--------------|--------------|---------|
| 1      | 13.583        | MM   | 0.8133      | 1.16450e5    | 2386.23022   | 92.7655 |
| 2      | 22.519        | MM   | 0.9697      | 9081.65625   | 156.08818    | 7.2345  |

Totals : 1.25532e5 2542.31841



### 5.15.1 HPLC trace of racemic 9o

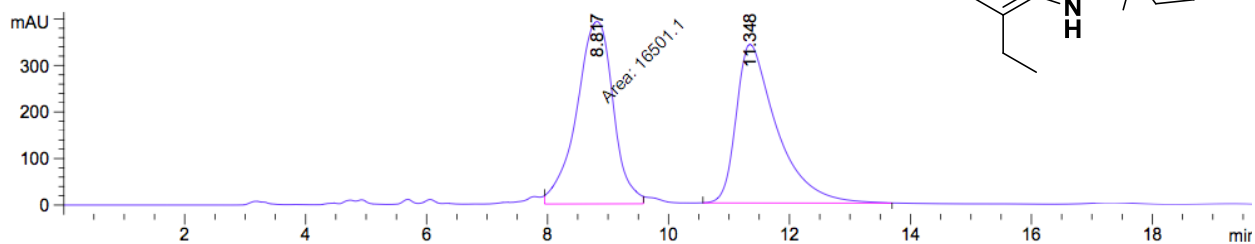

Signal 3: DAD1 C, Sig=220,8 Ref=360,100

| Peak #   | RetTime [min] | Type | Width [min] | Area [mAU*s] | Height [mAU] | Area %  |
|----------|---------------|------|-------------|--------------|--------------|---------|
| 1        | 8.817         | FM   | 0.7018      | 1.65011e4    | 391.85361    | 50.9273 |
| 2        | 11.348        | BB   | 0.6821      | 1.59002e4    | 340.96487    | 49.0727 |
| Totals : |               |      |             | 3.24012e4    | 732.81848    |         |

### 5.15.2 HPLC trace of enantioenriched 9o

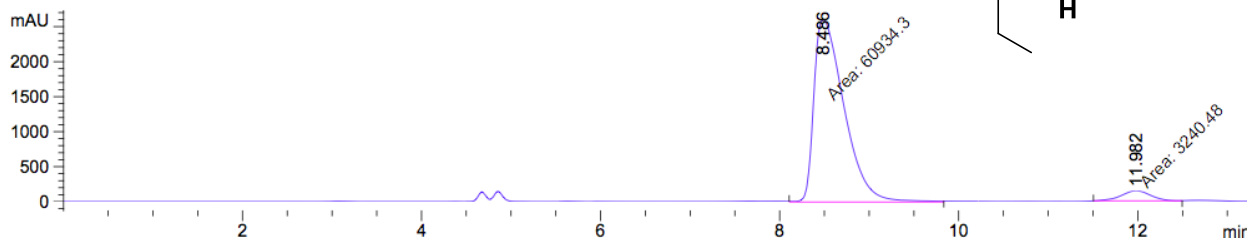

Signal 3: DAD1 C, Sig=220,8 Ref=360,100

| Peak #   | RetTime [min] | Type | Width [min] | Area [mAU*s] | Height [mAU] | Area %  |
|----------|---------------|------|-------------|--------------|--------------|---------|
| 1        | 8.486         | MM   | 0.3900      | 6.09343e4    | 2604.19678   | 94.9505 |
| 2        | 11.982        | MM   | 0.3750      | 3240.48462   | 144.01950    | 5.0495  |
| Totals : |               |      |             | 6.41747e4    | 2748.21628   |         |

### 5.16.1 HPLC trace of racemic 9p

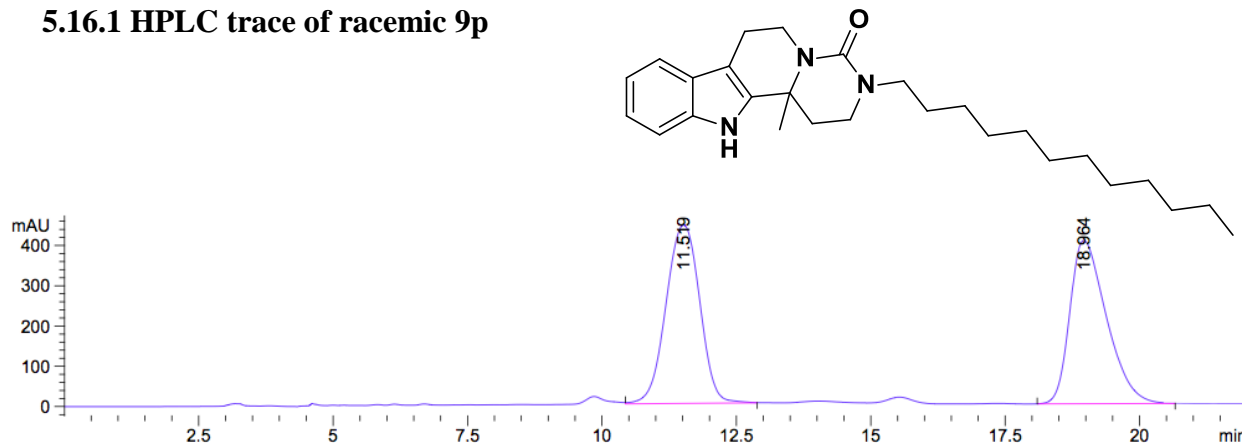

Signal 3: DAD1 C, Sig=220,8 Ref=360,100

| Peak # | RetTime [min] | Type | Width [min] | Area [mAU*s] | Height [mAU] | Area %  |
|--------|---------------|------|-------------|--------------|--------------|---------|
| 1      | 11.519        | VB   | 0.6965      | 1.93258e4    | 443.37531    | 50.1671 |
| 2      | 18.964        | BB   | 0.7236      | 1.91970e4    | 406.00046    | 49.8329 |

Totals : 3.85229e4 849.37576

### 5.16.2 HPLC trace of enantioenriched 9p

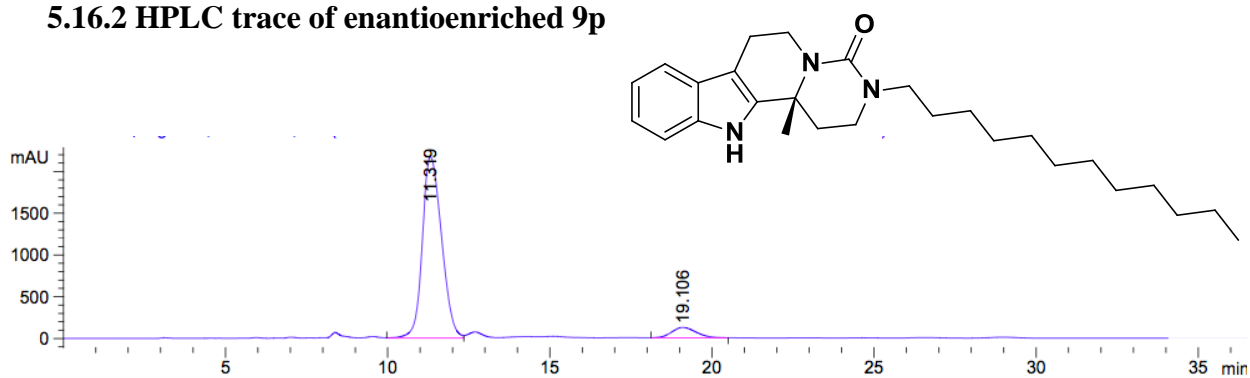

Signal 3: DAD1 C, Sig=220,8 Ref=360,100

| Peak # | RetTime [min] | Type | Width [min] | Area [mAU*s] | Height [mAU] | Area %  |
|--------|---------------|------|-------------|--------------|--------------|---------|
| 1      | 11.319        | VV   | 0.6470      | 8.95164e4    | 2171.06934   | 93.2987 |
| 2      | 19.106        | BB   | 0.8106      | 6429.60840   | 123.25988    | 6.7013  |

Totals : 9.59460e4 2294.32922

### 5.17.1 HPLC trace of racemic 9q

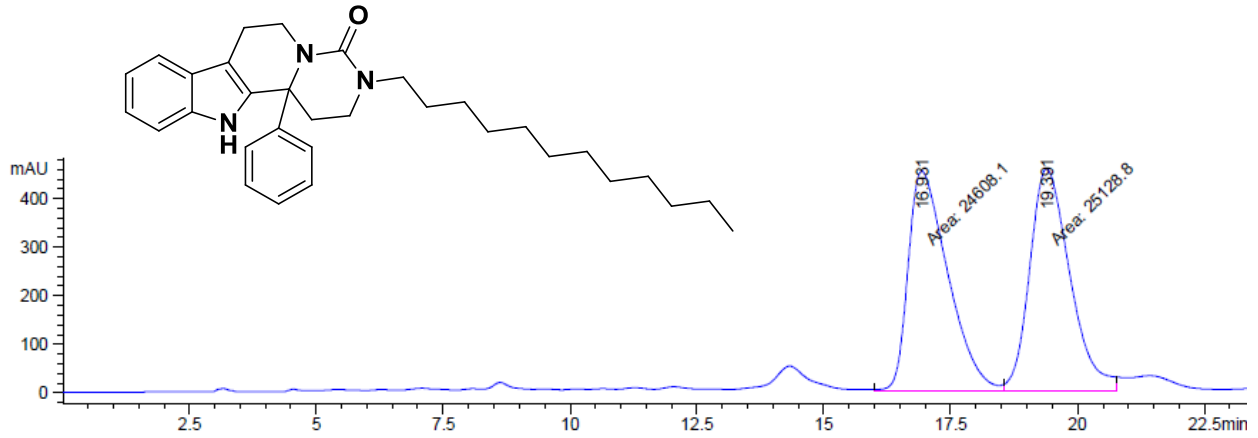

Signal 3: DAD1 C, Sig=220,8 Ref=360,100

| Peak # | RetTime [min] | Type | Width [min] | Area [mAU*s] | Height [mAU] | Area %  |
|--------|---------------|------|-------------|--------------|--------------|---------|
| 1      | 16.931        | MM   | 0.9069      | 2.46081e4    | 452.25519    | 49.4765 |
| 2      | 19.391        | MM   | 0.9167      | 2.51288e4    | 456.87338    | 50.5235 |

Totals : 4.97370e4 909.12857

### 5.17.2 HPLC trace of enantioenriched 9q

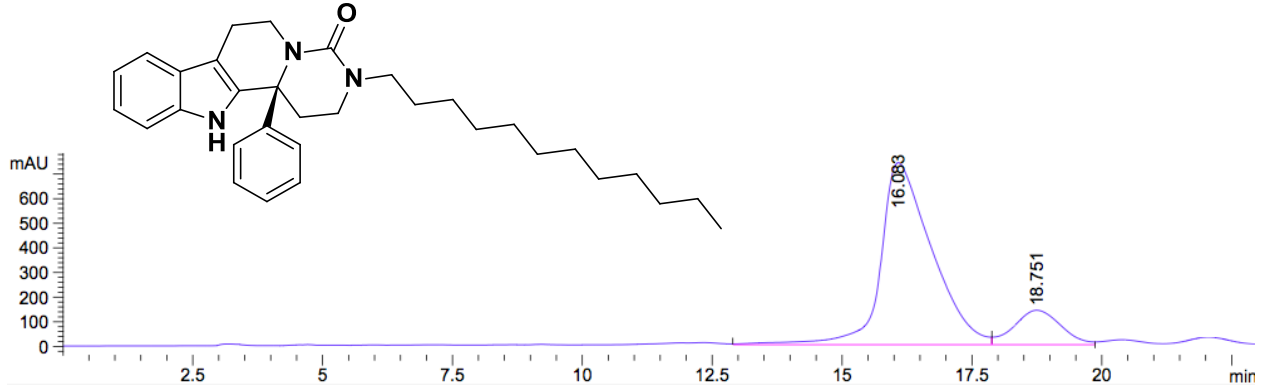

Signal 2: DAD1 B, Sig=220,8 Ref=360,100

| Peak # | RetTime [min] | Type | Width [min] | Area [mAU*s] | Height [mAU] | Area %  |
|--------|---------------|------|-------------|--------------|--------------|---------|
| 1      | 16.083        | VV   | 0.9892      | 5.07680e4    | 739.23029    | 85.3385 |
| 2      | 18.751        | VV   | 0.9612      | 8722.18164   | 139.93593    | 14.6615 |

Totals : 5.94902e4 879.16621

### 5.18.1 HPLC trace of racemic 9r

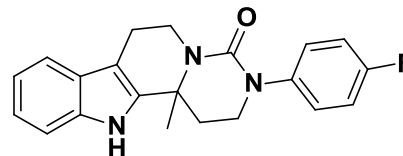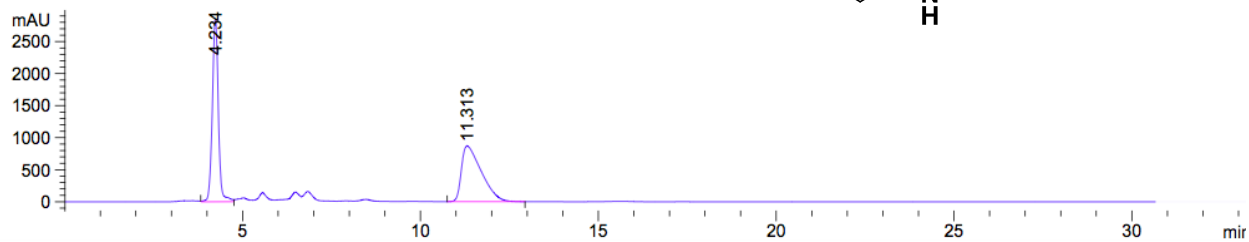

Signal 3: DAD1 C, Sig=220,8 Ref=360,100

| Peak # | RetTime [min] | Type | Width [min] | Area [mAU*s] | Height [mAU] | Area %  |
|--------|---------------|------|-------------|--------------|--------------|---------|
| 1      | 4.234         | VV   | 0.1774      | 3.35204e4    | 2845.25171   | 49.8565 |
| 2      | 11.313        | BB   | 0.5883      | 3.37134e4    | 869.58191    | 50.1435 |

Totals : 6.72338e4 3714.83362

### 5.18.2 HPLC trace of enantioenriched 9r

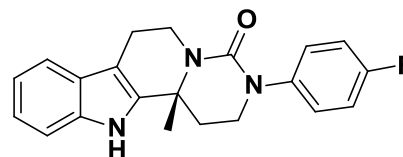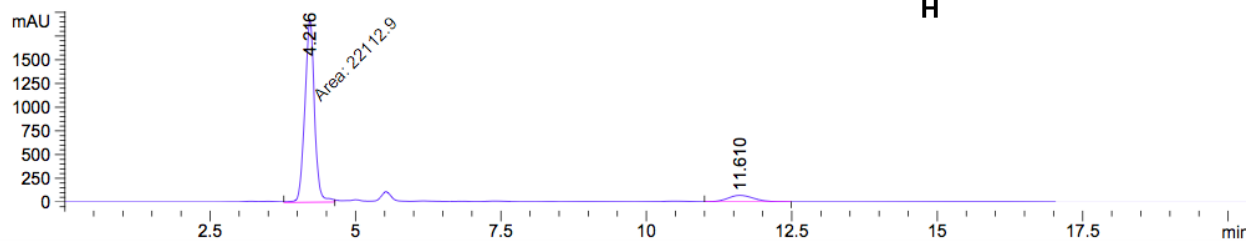

Signal 3: DAD1 C, Sig=220,8 Ref=360,100

| Peak # | RetTime [min] | Type | Width [min] | Area [mAU*s] | Height [mAU] | Area %  |
|--------|---------------|------|-------------|--------------|--------------|---------|
| 1      | 4.216         | MF   | 0.1924      | 2.21129e4    | 1915.04517   | 91.3112 |
| 2      | 11.610        | VB   | 0.4788      | 2104.17700   | 68.42592     | 8.6888  |

Totals : 2.42171e4 1983.47108

### 5.19.1 HPLC trace of racemic 9s

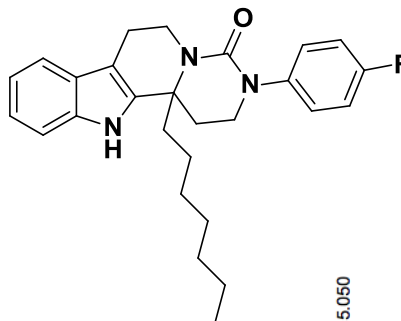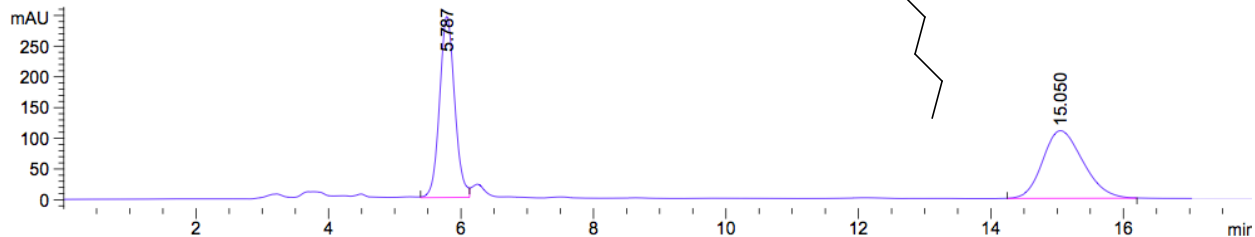

Signal 2: DAD1 B, Sig=220,16 Ref=360,100

| Peak # | RetTime [min] | Type | Width [min] | Area [mAU*s] | Height [mAU] | Area %  |
|--------|---------------|------|-------------|--------------|--------------|---------|
| 1      | 5.787         | BV   | 0.2448      | 4665.55713   | 294.60724    | 50.1021 |
| 2      | 15.050        | BB   | 0.6542      | 4646.53906   | 110.13287    | 49.8979 |

Totals : 9312.09619 404.74011

### 5.19.2 HPLC trace of enantioenriched 9s

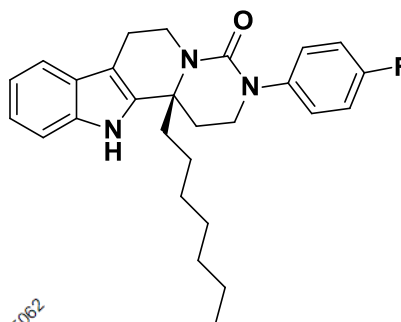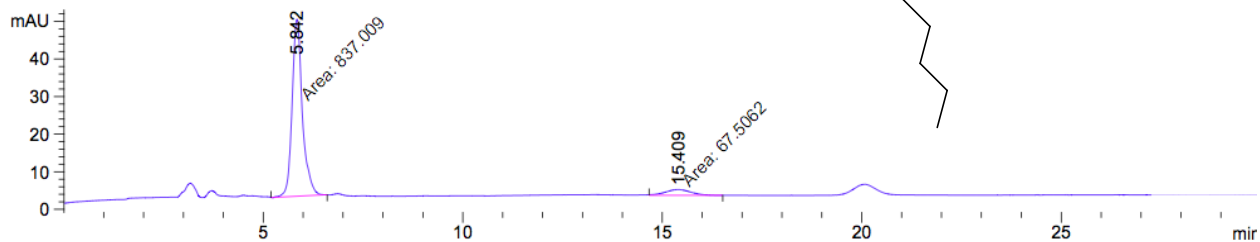

Signal 2: DAD1 B, Sig=220,8 Ref=360,100

| Peak # | RetTime [min] | Type | Width [min] | Area [mAU*s] | Height [mAU] | Area %  |
|--------|---------------|------|-------------|--------------|--------------|---------|
| 1      | 5.842         | MM   | 0.2959      | 837.00934    | 47.14312     | 92.5368 |
| 2      | 15.409        | MM   | 0.7438      | 67.50617     | 1.51255      | 7.4632  |

Totals : 904.51551 48.65567

### 5.20.1 HPLC trace of racemic 9t

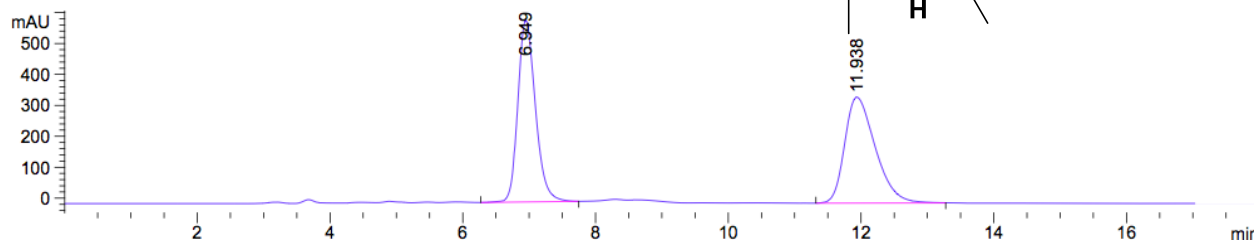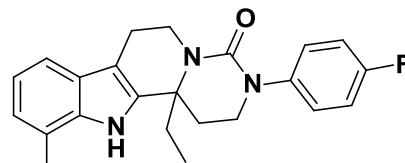

Signal 2: DAD1 B, Sig=220,16 Ref=360,100

| Peak # | RetTime [min] | Type | Width [min] | Area [mAU*s] | Height [mAU] | Area %  |
|--------|---------------|------|-------------|--------------|--------------|---------|
| 1      | 6.949         | VB   | 0.2826      | 1.08061e4    | 587.42609    | 49.6517 |
| 2      | 11.938        | BB   | 0.4931      | 1.09577e4    | 342.60583    | 50.3483 |

Totals : 2.17638e4 930.03192

### 5.20.2 HPLC trace of enantioenriched 9t

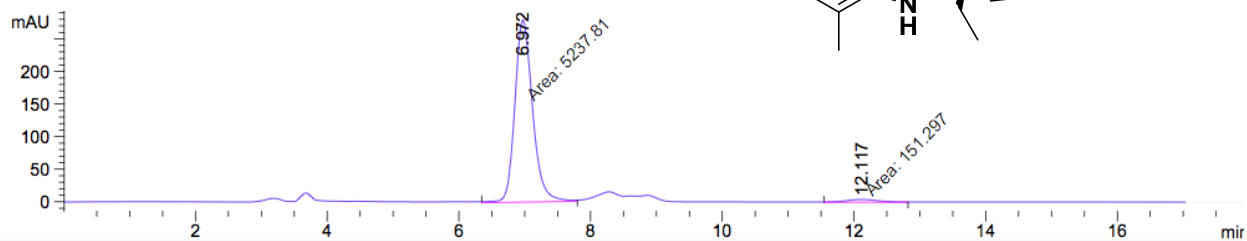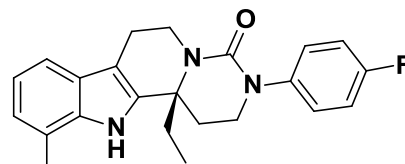

Signal 2: DAD1 B, Sig=220,16 Ref=360,100

| Peak # | RetTime [min] | Type | Width [min] | Area [mAU*s] | Height [mAU] | Area %  |
|--------|---------------|------|-------------|--------------|--------------|---------|
| 1      | 6.972         | MM   | 0.3129      | 5237.81445   | 278.97552    | 97.1925 |
| 2      | 12.117        | MM   | 0.5935      | 151.29684    | 4.24903      | 2.8075  |

Totals : 5389.11130 283.22456

### 5.21.1 HPLC trace of racemic 9u

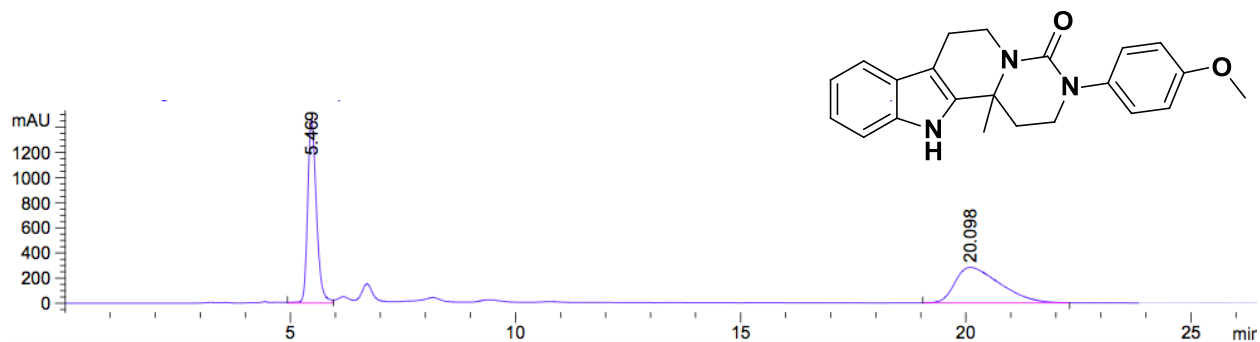

Signal 3: DAD1 C, Sig=220,8 Ref=360,100

| Peak # | RetTime [min] | Type | Width [min] | Area [mAU*s] | Height [mAU] | Area %  |
|--------|---------------|------|-------------|--------------|--------------|---------|
| 1      | 5.469         | VV   | 0.2079      | 1.97446e4    | 1458.60791   | 50.3041 |
| 2      | 20.098        | BB   | 1.0570      | 1.95059e4    | 281.99466    | 49.6959 |

Totals : 3.92505e4 1740.60257

### 5.21.2 HPLC trace of enantioenriched 9u

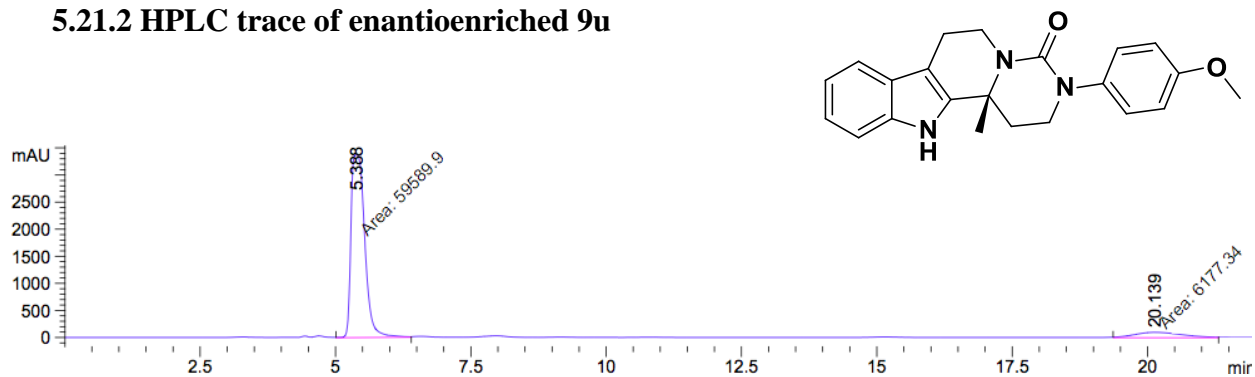

Signal 3: DAD1 C, Sig=220,8 Ref=360,100

| Peak # | RetTime [min] | Type | Width [min] | Area [mAU*s] | Height [mAU] | Area %  |
|--------|---------------|------|-------------|--------------|--------------|---------|
| 1      | 5.388         | MM   | 0.2943      | 5.95899e4    | 3374.79736   | 90.6073 |
| 2      | 20.139        | MM   | 1.0297      | 6177.33545   | 99.98903     | 9.3927  |

Totals : 6.57673e4 3474.78639

### 5.22.1 HPLC trace of racemic 9v

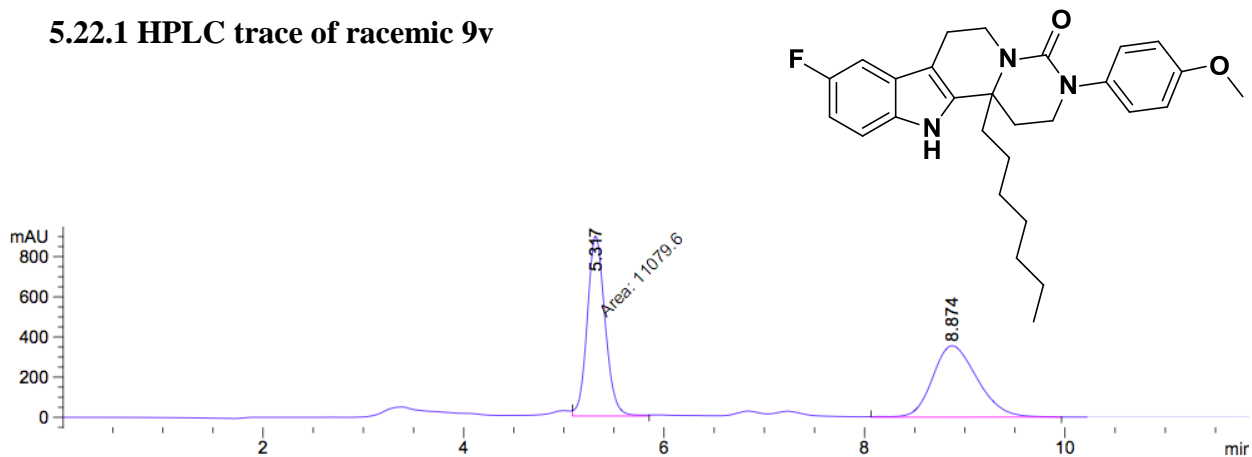

Signal 3: DAD1 C, Sig=220,8 Ref=360,100

| Peak # | RetTime [min] | Type | Width [min] | Area [mAU*s] | Height [mAU] | Area %  |
|--------|---------------|------|-------------|--------------|--------------|---------|
| 1      | 5.317         | FM   | 0.2058      | 1.10796e4    | 897.13824    | 50.2426 |
| 2      | 8.874         | BB   | 0.4785      | 1.09726e4    | 355.12552    | 49.7574 |

Totals : 2.20522e4 1252.26376

### 5.22.2 HPLC trace of enantioenriched 9v

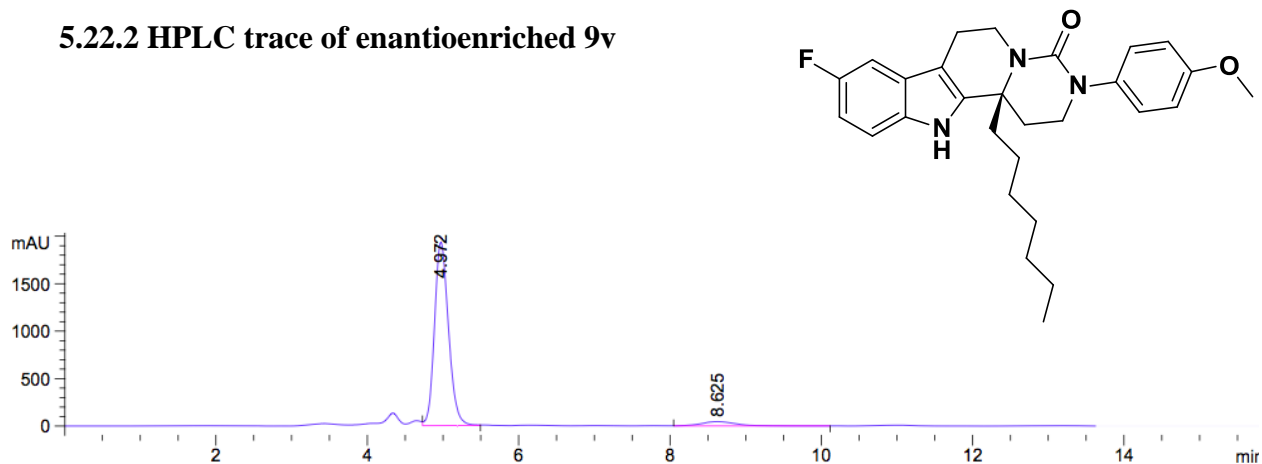

Signal 3: DAD1 C, Sig=220,8 Ref=360,100

| Peak # | RetTime [min] | Type | Width [min] | Area [mAU*s] | Height [mAU] | Area %  |
|--------|---------------|------|-------------|--------------|--------------|---------|
| 1      | 4.972         | VB   | 0.1981      | 2.48334e4    | 1929.70862   | 94.6152 |
| 2      | 8.625         | VB   | 0.4866      | 1413.32751   | 44.97867     | 5.3848  |

Totals : 2.62467e4 1974.68729



### 5.23.1 HPLC trace of racemic 9w

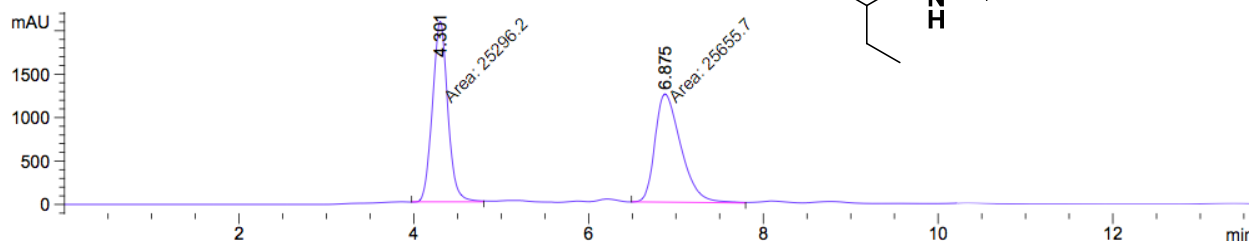

Signal 3: DAD1 C, Sig=220,8 Ref=360,100

| Peak # | RetTime [min] | Type | Width [min] | Area [mAU*s] | Height [mAU] | Area %  |
|--------|---------------|------|-------------|--------------|--------------|---------|
| 1      | 4.301         | MM   | 0.2031      | 2.52962e4    | 2076.03149   | 49.6473 |
| 2      | 6.875         | MM   | 0.3434      | 2.56557e4    | 1245.01917   | 50.3527 |

Totals : 5.09519e4 3321.05066

### 5.23.2 HPLC trace of enantioenriched 9w

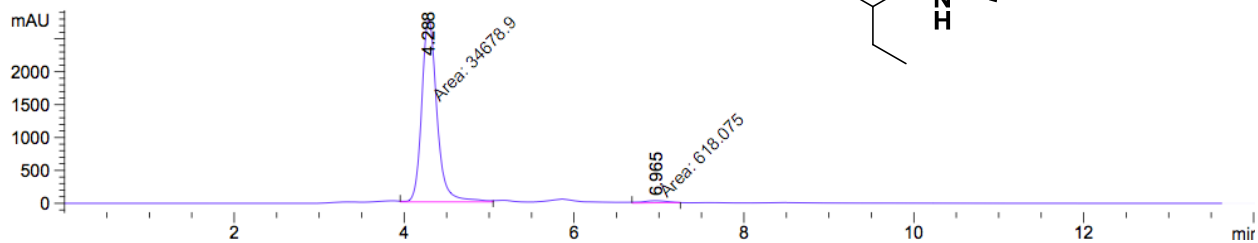

Signal 3: DAD1 C, Sig=220,8 Ref=360,100

| Peak # | RetTime [min] | Type | Width [min] | Area [mAU*s] | Height [mAU] | Area %  |
|--------|---------------|------|-------------|--------------|--------------|---------|
| 1      | 4.288         | MM   | 0.2089      | 3.46789e4    | 2767.33862   | 98.2489 |
| 2      | 6.965         | MM   | 0.3215      | 618.07465    | 32.04358     | 1.7511  |

Totals : 3.52970e4 2799.38220

## 6. Single crystal X-ray diffraction data for compound 9r

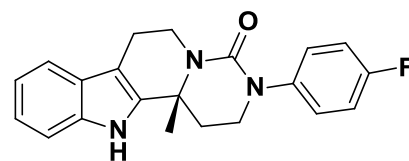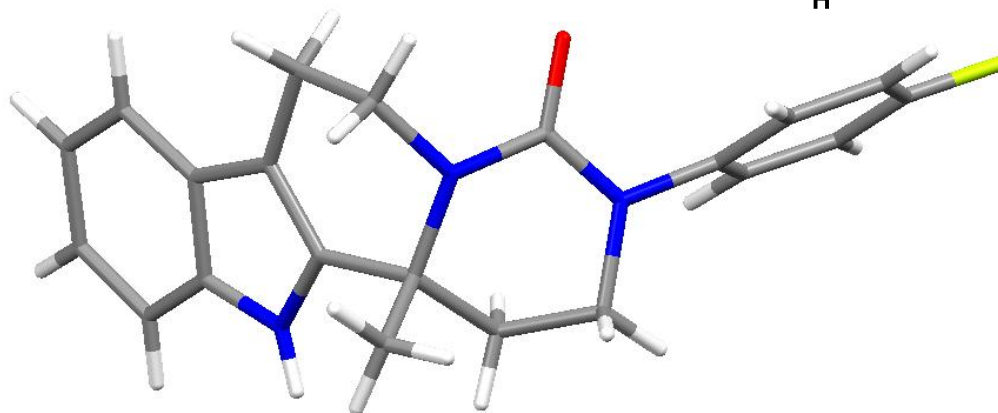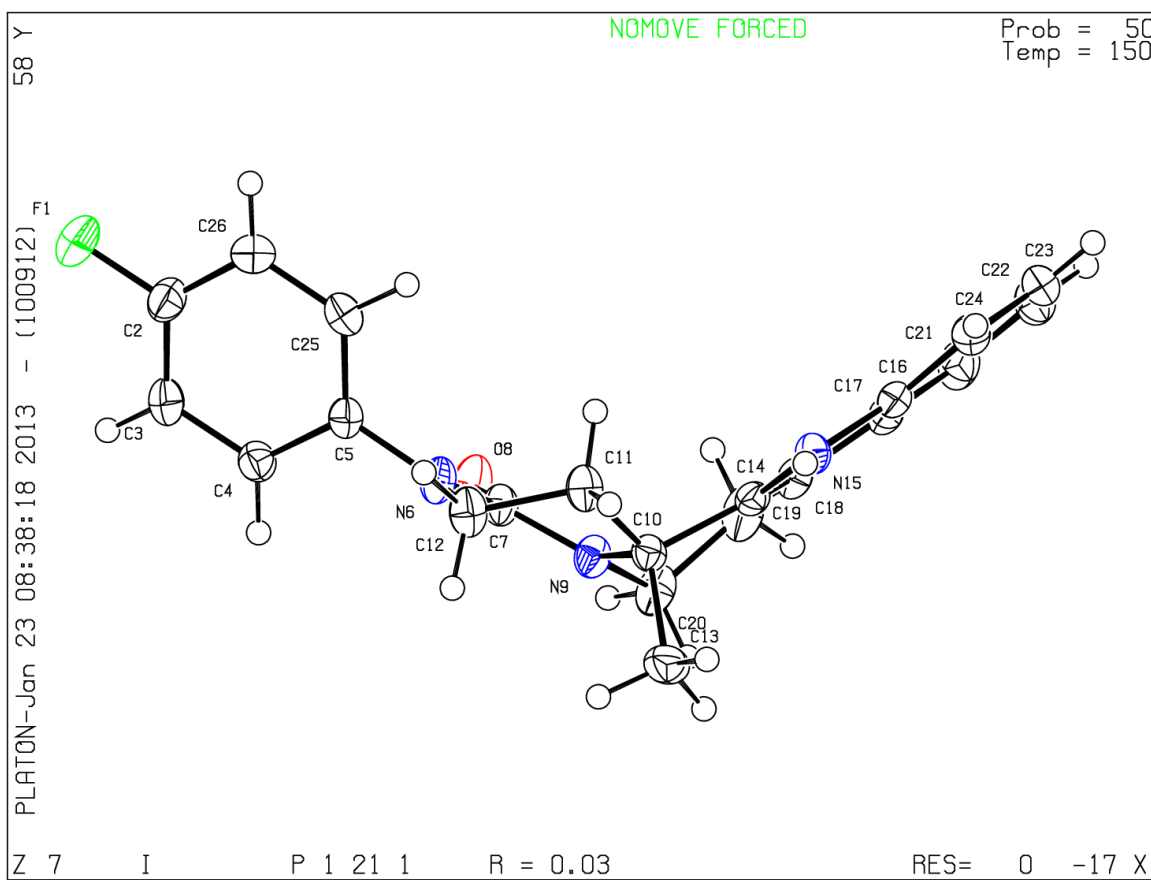

## (9r)

### Crystal data

C<sub>21</sub>H<sub>20</sub>FN<sub>3</sub>O  
 $M_r = 349.41$   
Monoclinic,  $P2_1$   
Hall symbol: P 2yb  
 $a = 7.1383 (1) \text{ \AA}$   
 $b = 10.6018 (1) \text{ \AA}$   
 $c = 12.0383 (1) \text{ \AA}$   
 $\beta = 102.3752 (6)^\circ$   
 $V = 889.88 (2) \text{ \AA}^3$   
 $Z = 2$

$F(000) = 368$   
 $D_x = 1.304 \text{ Mg m}^{-3}$   
Melting point: not measured K  
Cu  $K\alpha$  radiation,  $\lambda = 1.54180 \text{ \AA}$   
Cell parameters from 59434 reflections  
 $\theta = 4\text{--}77^\circ$   
 $\mu = 0.72 \text{ mm}^{-1}$   
 $T = 150 \text{ K}$   
Block, Clear\_pale\_colourless  
 $0.20 \times 0.15 \times 0.08 \text{ mm}$

### Data collection

Oxford Diffraction SuperNova  
diffractometer  
Graphite monochromator  
 $\omega$  scans  
Absorption correction: Multi-scan  
CrysAlis, (Oxford Diffraction, 2002)  
 $T_{\min} = 0.75$ ,  $T_{\max} = 0.94$   
76919 measured reflections  
3711 independent reflections

3698 reflections with  $I > 2.0\sigma(I)$   
 $R_{\text{int}} = 0.020$   
 $\theta_{\max} = 76.9^\circ$ ,  $\theta_{\min} = 3.8^\circ$   
 $h = -9\text{--}8$   
 $k = -13\text{--}13$   
 $l = -15\text{--}15$

### Refinement

Refinement on  $F^2$   
Least-squares matrix: Full  
 $R[F^2 > 2\sigma(F^2)] = 0.026$   
 $wR(F^2) = 0.067$   
 $S = 0.97$   
3711 reflections  
236 parameters  
1 restraint  
Primary atom site location: Structure-invariant  
direct methods

Hydrogen site location: Difference Fourier map  
H-atom parameters constrained  
Method = Modified Sheldrick  $w = 1/[\sigma^2(F^2) + (0.04P)^2 + 0.17P]$ ,  
where  $P = (\max(F_o^2, 0) + 2F_c^2)/3$   
 $(\Delta/\sigma)_{\max} = 0.0004$   
 $\Delta\rho_{\max} = 0.14 \text{ e \AA}^{-3}$   
 $\Delta\rho_{\min} = -0.14 \text{ e \AA}^{-3}$   
Absolute structure: Flack (1983), 1743 Friedel-pairs  
Flack parameter: 0.06 (11)

### Special details

*Refinement.* The Flack  $x$  parameter [Flack, 1983; Flack & Bernardinelli (2000)] refined to 0.05 (12), reducing to -0.001 (8) on the application of Bijvoet difference restraints [Thompson & Watkin, 2010]. Analysis of the Bijvoet differences [Hooft *et al.*, 2008] gave a Hooft  $y$  parameter of -0.03 (3),  $G$  of 1.06 (6), and a probability that the structure was the correct hand of >99.99% given that the structure is enantiopure or a racemic twin using the Bayesian method.

Fractional atomic coordinates and isotropic or equivalent isotropic displacement parameters ( $\text{\AA}^2$ )

|      | x             | y            | z            | $U_{\text{iso}}^*/U_{\text{eq}}$ |
|------|---------------|--------------|--------------|----------------------------------|
| F1   | -0.00358 (14) | 0.99563 (10) | 0.98412 (8)  | 0.0521                           |
| C2   | 0.08003 (19)  | 0.91592 (13) | 0.92023 (10) | 0.0338                           |
| C3   | 0.03623 (17)  | 0.78974 (13) | 0.92022 (10) | 0.0307                           |
| C4   | 0.12329 (16)  | 0.70895 (12) | 0.85599 (9)  | 0.0265                           |
| C5   | 0.24939 (15)  | 0.75645 (12) | 0.79293 (9)  | 0.0234                           |
| N6   | 0.34433 (12)  | 0.67285 (11) | 0.72988 (8)  | 0.0266                           |
| C7   | 0.24483 (14)  | 0.61977 (12) | 0.63222 (9)  | 0.0245                           |
| O8   | 0.06797 (10)  | 0.63142 (11) | 0.60392 (7)  | 0.0354                           |
| N9   | 0.34627 (13)  | 0.55022 (10) | 0.56999 (8)  | 0.0253                           |
| C10  | 0.55571 (14)  | 0.56518 (11) | 0.57476 (9)  | 0.0218                           |
| C11  | 0.63833 (15)  | 0.66469 (13) | 0.66405 (9)  | 0.0263                           |
| C12  | 0.55036 (14)  | 0.65099 (13) | 0.76740 (9)  | 0.0295                           |
| H122 | 0.5690        | 0.5654       | 0.8010       | 0.0358*                          |
| H121 | 0.6061        | 0.7131       | 0.8290       | 0.0358*                          |
| H111 | 0.6023        | 0.7505       | 0.6305       | 0.0308*                          |
| H112 | 0.7748        | 0.6552       | 0.6829       | 0.0315*                          |
| C13  | 0.66062 (18)  | 0.43964 (12) | 0.60394 (11) | 0.0347                           |
| H131 | 0.7933        | 0.4519       | 0.6016       | 0.0510*                          |
| H132 | 0.6064        | 0.3733       | 0.5510       | 0.0514*                          |
| H133 | 0.6515        | 0.4144       | 0.6805       | 0.0517*                          |
| C14  | 0.57102 (14)  | 0.61045 (11) | 0.45813 (8)  | 0.0212                           |
| N15  | 0.73261 (13)  | 0.66928 (10) | 0.43752 (7)  | 0.0239                           |
| C16  | 0.69180 (16)  | 0.71246 (11) | 0.32716 (9)  | 0.0254                           |
| C17  | 0.50181 (16)  | 0.67627 (12) | 0.27700 (9)  | 0.0273                           |
| C18  | 0.42830 (14)  | 0.61120 (12) | 0.36264 (9)  | 0.0251                           |
| C19  | 0.23178 (16)  | 0.55907 (15) | 0.36077 (10) | 0.0356                           |
| C20  | 0.23698 (17)  | 0.48506 (13) | 0.46907 (10) | 0.0329                           |
| H201 | 0.1072        | 0.4720       | 0.4813       | 0.0390*                          |
| H202 | 0.3000        | 0.4056       | 0.4636       | 0.0387*                          |
| H192 | 0.1893        | 0.5047       | 0.2969       | 0.0433*                          |
| H191 | 0.1373        | 0.6304       | 0.3556       | 0.0438*                          |
| C21  | 0.4220 (2)    | 0.71176 (14) | 0.16416 (10) | 0.0375                           |
| C22  | 0.5310 (2)    | 0.78393 (14) | 0.10684 (11) | 0.0435                           |
| C23  | 0.7175 (2)    | 0.82134 (13) | 0.15866 (12) | 0.0414                           |
| C24  | 0.8014 (2)    | 0.78619 (12) | 0.26938 (11) | 0.0329                           |
| H241 | 0.9257        | 0.8092       | 0.3035       | 0.0375*                          |
| H231 | 0.7898        | 0.8695       | 0.1190       | 0.0488*                          |
| H221 | 0.4770        | 0.8096       | 0.0284       | 0.0521*                          |
| H211 | 0.2899        | 0.6869       | 0.1277       | 0.0455*                          |
| H151 | 0.8427        | 0.6708       | 0.4829       | 0.0304*                          |
| C25  | 0.28774 (18)  | 0.88460 (13) | 0.79390 (10) | 0.0307                           |
| C26  | 0.20334 (19)  | 0.96629 (13) | 0.85882 (10) | 0.0349                           |
| H261 | 0.2290        | 1.0539       | 0.8611       | 0.0430*                          |

|      |         |        |        |         |
|------|---------|--------|--------|---------|
| H251 | 0.3739  | 0.9162 | 0.7481 | 0.0371* |
| H41  | 0.0949  | 0.6206 | 0.8546 | 0.0315* |
| H31  | -0.0490 | 0.7586 | 0.9615 | 0.0371* |

*Atomic displacement parameters ( $\text{\AA}^2$ )*

|     | $U^{11}$   | $U^{22}$   | $U^{33}$   | $U^{12}$    | $U^{13}$   | $U^{23}$    |
|-----|------------|------------|------------|-------------|------------|-------------|
| F1  | 0.0684 (6) | 0.0416 (4) | 0.0565 (5) | 0.0120 (4)  | 0.0357 (4) | -0.0078 (4) |
| C2  | 0.0395 (6) | 0.0338 (6) | 0.0304 (6) | 0.0095 (5)  | 0.0125 (5) | -0.0018 (5) |
| C3  | 0.0290 (6) | 0.0386 (6) | 0.0272 (5) | 0.0000 (5)  | 0.0124 (4) | -0.0001 (4) |
| C4  | 0.0272 (5) | 0.0276 (5) | 0.0255 (5) | -0.0021 (4) | 0.0075 (4) | 0.0002 (4)  |
| C5  | 0.0211 (5) | 0.0291 (5) | 0.0200 (5) | 0.0014 (4)  | 0.0045 (4) | -0.0007 (4) |
| N6  | 0.0186 (4) | 0.0368 (5) | 0.0248 (4) | 0.0014 (4)  | 0.0058 (3) | -0.0041 (4) |
| C7  | 0.0211 (4) | 0.0288 (5) | 0.0250 (5) | -0.0027 (4) | 0.0081 (4) | -0.0016 (4) |
| O8  | 0.0184 (4) | 0.0559 (5) | 0.0319 (4) | -0.0008 (4) | 0.0052 (3) | -0.0121 (4) |
| N9  | 0.0203 (4) | 0.0284 (5) | 0.0290 (4) | -0.0048 (3) | 0.0094 (3) | -0.0052 (4) |
| C10 | 0.0184 (5) | 0.0237 (5) | 0.0244 (5) | 0.0001 (4)  | 0.0074 (4) | 0.0015 (4)  |
| C11 | 0.0185 (4) | 0.0362 (5) | 0.0244 (5) | -0.0024 (4) | 0.0055 (4) | -0.0017 (4) |
| C12 | 0.0199 (5) | 0.0443 (7) | 0.0240 (5) | 0.0030 (4)  | 0.0042 (4) | 0.0009 (5)  |
| C13 | 0.0356 (6) | 0.0293 (6) | 0.0421 (6) | 0.0087 (5)  | 0.0149 (5) | 0.0101 (5)  |
| C14 | 0.0206 (4) | 0.0194 (4) | 0.0247 (5) | 0.0021 (4)  | 0.0076 (4) | -0.0008 (4) |
| N15 | 0.0221 (4) | 0.0277 (4) | 0.0224 (4) | -0.0021 (3) | 0.0060 (3) | -0.0007 (4) |
| C16 | 0.0343 (6) | 0.0212 (5) | 0.0224 (5) | 0.0027 (4)  | 0.0098 (4) | -0.0023 (4) |
| C17 | 0.0307 (5) | 0.0285 (5) | 0.0229 (5) | 0.0085 (4)  | 0.0060 (4) | -0.0025 (4) |
| C18 | 0.0225 (5) | 0.0290 (5) | 0.0240 (5) | 0.0028 (4)  | 0.0052 (4) | -0.0047 (4) |
| C19 | 0.0234 (5) | 0.0512 (7) | 0.0316 (6) | -0.0045 (5) | 0.0042 (4) | -0.0137 (6) |
| C20 | 0.0268 (5) | 0.0365 (6) | 0.0384 (6) | -0.0107 (5) | 0.0135 (5) | -0.0156 (5) |
| C21 | 0.0429 (7) | 0.0448 (7) | 0.0233 (5) | 0.0136 (6)  | 0.0038 (5) | -0.0002 (5) |
| C22 | 0.0631 (9) | 0.0436 (8) | 0.0250 (6) | 0.0160 (6)  | 0.0121 (6) | 0.0064 (5)  |
| C23 | 0.0690 (9) | 0.0284 (6) | 0.0342 (6) | 0.0037 (6)  | 0.0277 (6) | 0.0050 (5)  |
| C24 | 0.0444 (7) | 0.0264 (5) | 0.0322 (6) | -0.0043 (5) | 0.0175 (5) | -0.0027 (4) |
| C25 | 0.0339 (6) | 0.0319 (6) | 0.0288 (6) | -0.0026 (5) | 0.0126 (4) | 0.0045 (5)  |
| C26 | 0.0441 (7) | 0.0263 (6) | 0.0360 (6) | 0.0033 (5)  | 0.0124 (5) | 0.0028 (5)  |

*Geometric parameters ( $\text{\AA}$ ,  $^\circ$ )*

|        |             |          |             |
|--------|-------------|----------|-------------|
| F1—C2  | 1.3634 (13) | C13—H133 | 0.975       |
| C2—C3  | 1.3738 (18) | C14—N15  | 1.3798 (13) |
| C2—C26 | 1.3730 (18) | C14—C18  | 1.3628 (14) |
| C3—C4  | 1.3869 (16) | N15—C16  | 1.3761 (14) |
| C3—H31 | 0.925       | N15—H151 | 0.856       |
| C4—C5  | 1.3903 (15) | C16—C17  | 1.4143 (16) |
| C4—H41 | 0.958       | C16—C24  | 1.3931 (16) |
| C5—N6  | 1.4288 (14) | C17—C18  | 1.4304 (15) |
| C5—C25 | 1.3855 (17) | C17—C21  | 1.4070 (16) |
| N6—C7  | 1.3585 (14) | C18—C19  | 1.5035 (15) |

|              |             |               |             |
|--------------|-------------|---------------|-------------|
| N6—C12       | 1.4615 (13) | C19—C20       | 1.5152 (19) |
| C7—O8        | 1.2413 (13) | C19—H192      | 0.956       |
| C7—N9        | 1.3644 (14) | C19—H191      | 1.006       |
| N9—C10       | 1.4923 (12) | C20—H201      | 0.978       |
| N9—C20       | 1.4682 (14) | C20—H202      | 0.964       |
| C10—C11      | 1.5311 (15) | C21—C22       | 1.377 (2)   |
| C10—C13      | 1.5307 (15) | C21—H211      | 0.987       |
| C10—C14      | 1.5098 (14) | C22—C23       | 1.401 (2)   |
| C11—C12      | 1.5160 (14) | C22—H221      | 0.980       |
| C11—H111     | 1.006       | C23—C24       | 1.3900 (19) |
| C11—H112     | 0.957       | C23—H231      | 0.928       |
| C12—H122     | 0.990       | C24—H241      | 0.927       |
| C12—H121     | 1.008       | C25—C26       | 1.3877 (17) |
| C13—H131     | 0.962       | C25—H251      | 0.969       |
| C13—H132     | 0.972       | C26—H261      | 0.946       |
| F1—C2—C3     | 118.46 (11) | C10—C14—N15   | 122.74 (9)  |
| F1—C2—C26    | 118.12 (12) | C10—C14—C18   | 126.60 (9)  |
| C3—C2—C26    | 123.42 (11) | N15—C14—C18   | 110.38 (9)  |
| C2—C3—C4     | 118.18 (11) | C14—N15—C16   | 108.17 (9)  |
| C2—C3—H31    | 121.6       | C14—N15—H151  | 125.6       |
| C4—C3—H31    | 120.3       | C16—N15—H151  | 125.8       |
| C3—C4—C5     | 120.04 (10) | N15—C16—C17   | 107.89 (9)  |
| C3—C4—H41    | 119.7       | N15—C16—C24   | 130.05 (11) |
| C5—C4—H41    | 120.3       | C17—C16—C24   | 121.94 (11) |
| C4—C5—N6     | 120.11 (10) | C16—C17—C18   | 106.83 (9)  |
| C4—C5—C25    | 120.03 (10) | C16—C17—C21   | 119.49 (11) |
| N6—C5—C25    | 119.83 (10) | C18—C17—C21   | 133.61 (11) |
| C5—N6—C7     | 119.81 (9)  | C17—C18—C14   | 106.70 (9)  |
| C5—N6—C12    | 119.65 (9)  | C17—C18—C19   | 130.67 (10) |
| C7—N6—C12    | 120.44 (9)  | C14—C18—C19   | 122.47 (10) |
| N6—C7—O8     | 120.57 (10) | C18—C19—C20   | 109.07 (10) |
| N6—C7—N9     | 117.29 (9)  | C18—C19—H192  | 111.5       |
| O8—C7—N9     | 122.10 (10) | C20—C19—H192  | 109.0       |
| C7—N9—C10    | 124.52 (9)  | C18—C19—H191  | 109.6       |
| C7—N9—C20    | 117.27 (9)  | C20—C19—H191  | 109.6       |
| C10—N9—C20   | 115.60 (8)  | H192—C19—H191 | 108.1       |
| N9—C10—C11   | 109.41 (8)  | C19—C20—N9    | 112.27 (10) |
| N9—C10—C13   | 110.69 (9)  | C19—C20—H201  | 110.7       |
| C11—C10—C13  | 110.01 (9)  | N9—C20—H201   | 107.1       |
| N9—C10—C14   | 105.64 (8)  | C19—C20—H202  | 108.6       |
| C11—C10—C14  | 109.88 (9)  | N9—C20—H202   | 107.1       |
| C13—C10—C14  | 111.12 (9)  | H201—C20—H202 | 111.0       |
| C10—C11—C12  | 110.19 (9)  | C17—C21—C22   | 118.50 (13) |
| C10—C11—H111 | 108.3       | C17—C21—H211  | 120.5       |
| C12—C11—H111 | 107.5       | C22—C21—H211  | 120.9       |
| C10—C11—H112 | 108.3       | C21—C22—C23   | 121.26 (12) |

|               |            |              |             |
|---------------|------------|--------------|-------------|
| C12—C11—H112  | 112.0      | C21—C22—H221 | 119.4       |
| H111—C11—H112 | 110.5      | C23—C22—H221 | 119.4       |
| C11—C12—N6    | 107.31 (8) | C22—C23—C24  | 121.64 (12) |
| C11—C12—H122  | 112.4      | C22—C23—H231 | 120.5       |
| N6—C12—H122   | 108.0      | C24—C23—H231 | 117.9       |
| C11—C12—H121  | 112.0      | C16—C24—C23  | 117.14 (13) |
| N6—C12—H121   | 109.7      | C16—C24—H241 | 120.8       |
| H122—C12—H121 | 107.4      | C23—C24—H241 | 122.0       |
| C10—C13—H131  | 108.2      | C5—C25—C26   | 120.52 (11) |
| C10—C13—H132  | 111.9      | C5—C25—H251  | 118.8       |
| H131—C13—H132 | 109.5      | C26—C25—H251 | 120.6       |
| C10—C13—H133  | 109.1      | C25—C26—C2   | 117.79 (12) |
| H131—C13—H133 | 109.3      | C25—C26—H261 | 121.6       |
| H132—C13—H133 | 108.9      | C2—C26—H261  | 120.6       |

*Hydrogen-bond geometry* ( $\text{\AA}$ ,  $^\circ$ )

| <i>D</i> —H $\cdots$ <i>A</i>     | <i>D</i> —H | H $\cdots$ <i>A</i> | <i>D</i> $\cdots$ <i>A</i> | <i>D</i> —H $\cdots$ <i>A</i> |
|-----------------------------------|-------------|---------------------|----------------------------|-------------------------------|
| C11—H112 $\cdots$ O8 <sup>i</sup> | 0.96        | 2.49                | 3.3175 (18)                | 145                           |
| N15—H151 $\cdots$ O8 <sup>i</sup> | 0.86        | 1.97                | 2.8017 (18)                | 164                           |

Symmetry code: (i)  $x+1, y, z$ .
